# Supplementary material
Source: publisher site journal article supplement (https://www.dovepress.com/article/430453)
Supplement: Supplementary file 1 [file get_supplementary_file.php]

## Supplementary tables

**Supplementary Table1. The demographics and perioperative characteristics in 20 patients for serum proteomic analysis.**

|                                                                             | Bottom 10<br>(all in Group C) | Top 10<br>(all in Group S) | <i>P</i> value |
|-----------------------------------------------------------------------------|-------------------------------|----------------------------|----------------|
| Patient age, mean±SD, y                                                     | 53.9±5.3                      | 52.9±4.5                   | 0.656          |
| BMI, mean±SD, kg/m <sup>2</sup>                                             | 23.9±2.1                      | 23.9±1.9                   | 0.978          |
| ASA physical status, n (%)                                                  |                               |                            |                |
| I                                                                           | 3 (30)                        | 3 (30)                     | >0.999         |
| II                                                                          | 7 (70)                        | 7 (70)                     |                |
| Preoperative comorbidity, n (%)                                             |                               |                            |                |
| Hypertension                                                                | 4 (40)                        | 3 (30)                     | >0.999         |
| Diabetes mellitus                                                           | 2 (20)                        | 1 (10)                     | >0.999         |
| Anemia                                                                      | 0 (0)                         | 1 (10)                     | >0.999         |
| Peripheral neuritis                                                         | 1 (10)                        | 3 (30)                     | 0.576          |
| History of surgery                                                          | 6 (60)                        | 5 (50)                     | >0.999         |
| PSQI of the recent 1 month, M (P <sub>25</sub> , P <sub>75</sub> )          | 8 (3.5, 10)                   | 2 (1.0, 8.0)               | 0.105          |
| RCSQ of the night before surgery,<br>M (P <sub>25</sub> , P <sub>75</sub> ) | 80 (77.5, 90)                 | 80 (57.5, 82.5)            | 0.237          |

BMI; body mass index. ASA; American Society of Anesthesiologists. PSQI; Pittsburgh sleep quality index. RCSQ; Richards-Campbell Sleep Questionnaire.

**Supplementary Table 2. Intraoperative and postoperative characteristics in 20 patients for serum proteomic analysis.**

|                                                                                          | Bottom 10<br>(all in Group C) | Top 10<br>(all in Group S) | <i>P</i> value |
|------------------------------------------------------------------------------------------|-------------------------------|----------------------------|----------------|
| <b>Study drug infusion</b>                                                               |                               |                            |                |
| S-ketamine, mean ± SD, mg                                                                | -                             | 30.0±11.8                  | -              |
| <b>Intravascular volume status</b>                                                       |                               |                            |                |
| Total intraoperative infusion, M ( <i>P</i> <sub>25</sub> , <i>P</i> <sub>75</sub> ), ml | 1500 (1500, 2000)             | 1550 (1500, 2000)          | 0.870          |
| Red blood cell transfusion requirement, n (%)                                            | 1 (10)                        | 0 (0)                      | >0.999         |
| Blood loss, M ( <i>P</i> <sub>25</sub> , <i>P</i> <sub>75</sub> ), ml                    | 200 (100, 225)                | 200 (137.5, 212.5)         | 0.844          |
| Total urine output, M ( <i>P</i> <sub>25</sub> , <i>P</i> <sub>75</sub> ), ml            | 200 (137.5, 262.5)            | 225 (50, 312.5)            | 0.879          |
| Duration of general anesthesia, mean ± SD, h                                             | 3.4±0.8                       | 2.9±0.9                    | 0.264          |

**Supplementary Table 3. Postoperative variables in 20 patients for serum proteomic analysis.**

|                                                                                          | Bottom 10<br>(all in Group C) | Top 10<br>(all in Group S) | 95% CI        | <i>P</i> value |
|------------------------------------------------------------------------------------------|-------------------------------|----------------------------|---------------|----------------|
| Percentage of stage N3 sleep, M ( <i>P</i> <sub>25</sub> , <i>P</i> <sub>75</sub> ), %   | 6.1 (4.9, 6.4)                | 19.6 (18.2, 23.3)          | 12.3 to 16.8  | <0.001         |
| Percentage of stage N2 sleep, M ( <i>P</i> <sub>25</sub> , <i>P</i> <sub>75</sub> ), %   | 52.3 (41.9, 58.9)             | 46.9 (41.7, 50.2)          | -12.1 to 4.6  | 0.481          |
| Percentage of stage N1 sleep, M ( <i>P</i> <sub>25</sub> , <i>P</i> <sub>75</sub> ), %   | 19.3 (9.6, 28.7)              | 13.8 (8.8, 16.8)           | -15.8 to 3.0  | 0.315          |
| Percentage of stage REM sleep, M ( <i>P</i> <sub>25</sub> , <i>P</i> <sub>75</sub> ), %  | 23.2 (9.7, 36.5)              | 19.9 (11.5, 25.7)          | -15.5 to 8.2  | 0.579          |
| Total sleep time, mean ± SD, minutes                                                     | 468.1±51.2                    | 475.5±58.9                 | -44.4 to 59.3 | 0.767          |
| Sleep efficiency, M ( <i>P</i> <sub>25</sub> , <i>P</i> <sub>75</sub> ), %               | 68.6 (56.1, 69.9)             | 64.3 (44.4, 72.8)          | -25.0 to 7.5  | 0.436          |
| RCSQ of the surgery tonight, M ( <i>P</i> <sub>25</sub> , <i>P</i> <sub>75</sub> )       | 55 (47.5, 65)                 | 60 (53.8, 60)              | -5 to 10      | 0.796          |
| RCSQ of the next night of surgery, M ( <i>P</i> <sub>25</sub> , <i>P</i> <sub>75</sub> ) | 76 (68.8, 80)                 | 75 (70, 80)                | -7.0 to 10    | 0.971          |
| Daytime sleep, M ( <i>P</i> <sub>25</sub> , <i>P</i> <sub>75</sub> ), minutes            | 64 (55, 81)                   | 56 (41.3, 79.8)            | -28 to 16     | 0.315          |

REM; Rapid Eye Movement. RCSQ; Richards-Campbell Sleep Questionnaire. VAS; Visual Analogue Scale.

**Supplementary Table 4. The complete blood count and biochemistry marker in 20 patients for serum proteomic analysis.**

|                                                                    | Bottom 10<br>(all in Group C) | Top 10<br>(all in Group S) | 95% CI        | <i>P</i> value |
|--------------------------------------------------------------------|-------------------------------|----------------------------|---------------|----------------|
| Before surgery                                                     |                               |                            |               |                |
| WBC, mean ± SD, ×10 <sup>6</sup>                                   | 4.8±1.8                       | 4.2±0.7                    | -1.9 to 0.7   | 0.338          |
| LYM, mean ± SD, ×10 <sup>6</sup>                                   | 1.1±0.3                       | 1.4±0.3                    | -0.1 to 0.6   | 0.108          |
| MON, mean ± SD, ×10 <sup>6</sup>                                   | 0.3±0.1                       | 0.3±0.1                    | -0.1 to 0.1   | 0.490          |
| NEU, mean ± SD, ×10 <sup>6</sup>                                   | 3.3±1.4                       | 2.5±0.7                    | -1.9 to 0.2   | 0.103          |
| CA125, M ( <i>P</i> <sub>25</sub> , <i>P</i> <sub>75</sub> ), U/ml | 23.3 (9.3, 43.2)              | 11.9 (9.1, 36.8)           | -21.4 to 17.3 | 0.631          |
| CA199, M ( <i>P</i> <sub>25</sub> , <i>P</i> <sub>75</sub> ), U/ml | 9.1 (8.3, 15.4)               | 9.9 (6.7, 15.9)            | -8.4 to 6.2   | 0.739          |
| After surgery                                                      |                               |                            |               |                |
| WBC, mean ± SD, ×10 <sup>6</sup>                                   | 5.9±2.4                       | 5.7±1.3                    | -2.0 to 1.6   | 0.812          |
| LYM, mean ± SD, ×10 <sup>6</sup>                                   | 1.1±0.4                       | 1.1±0.1                    | -0.2 to 0.4   | 0.561          |
| MON, mean ± SD, ×10 <sup>6</sup>                                   | 0.4±0.1                       | 0.4±0.1                    | -0.1 to 0.1   | 0.527          |
| NEU, mean ± SD, ×10 <sup>6</sup>                                   | 4.4±2.0                       | 4.1±1.3                    | -1.8 to 1.3   | 0.735          |
| CRP, mean ± SD, mg/L                                               | 44.8±20.0                     | 38.5±14.8                  | -22.8 to 10.2 | 0.436          |

WBC; white blood cell. LYM; lymphocyte. MON; monocyte. NEU; neutrophil. CA; cancer antigen. CRP; C-reactive protein.

# additional file 1: page 1 to 157

| Protein  | Description              | Gene      | S1       | S2       | S3       | S4       | S5       | S6       |
|----------|--------------------------|-----------|----------|----------|----------|----------|----------|----------|
| A0A024QZ | Fast skeletal            | MYLPF     | 8562.835 | 7119.879 | 6431.578 | 11488.73 | 12045.79 | 0        |
| A0A024QZ | Vinculin, iso            | VCL       | 24888.8  | 12966.82 | 12966.8  | 22621.92 | 16439.72 | 9751.627 |
| A0A024QZ | Prosaposin               | PSAP      | 75918.93 | 43537.51 | 55446.31 | 35656.9  | 52357.05 | 51917.12 |
| A0A024QZ | Histone H2b              | HIST1H2BI | 44143.59 | 55552.07 | 29520.44 | 46087.43 | 58784.22 | 66996.16 |
| A0A024R0 | Histone H2a              | HIST1H2AI | 0        | 87649.3  | 0        | 121695.7 | 0        | 68839.33 |
| A0A024R0 | Complement               | C9        | 8912136  | 5630234  | 7619090  | 4365540  | 4162838  | 5063551  |
| A0A024R0 | Apolipoprotein           | APOC1     | 9772600  | 9600276  | 9383676  | 10458350 | 9614715  | 10315368 |
| A0A024R0 | ADP-ribosyl              | ARF3      | 13070.78 | 6082.151 | 0        | 10132.07 | 9198.02  | 0        |
| A0A024R1 | Fructose-1,6-            | ALDOB     | 0        | 10500.77 | 14635.81 | 5685.887 | 9611.644 | 6248.626 |
| A0A024R1 | Apolipoprotein           | APOL1     | 410367.8 | 331930.4 | 340448.3 | 306971.2 | 341348.3 | 469900.1 |
| A0A024R1 | Myosin, heavy            | MYH9      | 13315.29 | 4681.029 | 6302.858 | 8420.55  | 9491.14  | 11653.94 |
| A0A024R1 | Insulin-like             | IGFBP4    | 63812.64 | 54485.69 | 44173.75 | 39589.47 | 47724.93 | 67066.31 |
| A0A024R1 | Junctional               | JUP       | 0        | 25640.36 | 49530.67 | 0        | 263889.1 | 0        |
| A0A024R2 | C-type lectin            | CLEC3B    | 634567.5 | 551511.3 | 638992.9 | 531709.3 | 646357.4 | 569890.1 |
| A0A024R3 | Cathepsin                | CTSB      | 25457.6  | 36669.62 | 16311.56 | 9252.642 | 21913.65 | 19212.58 |
| A0A024R3 | Apolipoprotein           | APOA1     | 66781632 | 55529608 | 63213176 | 43561768 | 47859588 | 1.27E+08 |
| A0A024R3 | Melanoma                 | MCAM      | 0        | 19561.51 | 15850.43 | 13089.78 | 7851.618 | 7138.746 |
| A0A024R3 | Amyloid beta             | APLP2     | 72194.07 | 98026.99 | 72359.98 | 75577.48 | 26474.73 | 5934.234 |
| A0A024R4 | Insulin-like             | IGFBP5    | 6745.469 | 8692.381 | 0        | 8372.411 | 10411.44 | 11278.18 |
| A0A024R4 | Uncharacterized          | MGC99813  | 5147083  | 4771931  | 6165951  | 4493486  | 5991309  | 7256968  |
| A0A024R4 | Enolase 1,               | ENO1      | 8454.826 | 16196.35 | 0        | 0        | 5171.161 | 23353.81 |
| A0A024R5 | Glucosyl                 | GANAB     | 0        | 136470   | 0        | 97894.77 | 0        | 0        |
| A0A024R5 | Cortactin,               | CTTN      | 747610.6 | 717702.8 | 823455.3 | 1091971  | 1130615  | 791332.1 |
| A0A024R5 | Annexin                  | ANXA2     | 0        | 0        | 0        | 0        | 4686.125 | 0        |
| A0A024R6 | Actinin, alpha           | ACTN1     | 27367.69 | 5783.603 | 102917.6 | 9943.832 | 11049.26 | 52652.55 |
| A0A024R6 | Fibulin 5,               | FBLN5     | 40556.12 | 21841.4  | 30772.12 | 51199.3  | 75342.48 | 39086.04 |
| A0A024R6 | Serpin peptidase         | SERPINA10 | 393280.6 | 260518.9 | 319352.5 | 328445.9 | 244046.6 | 239935.3 |
| A0A024R6 | Alpha-1-antitrypsin      | SERPINA1  | 21643.42 | 0        | 0        | 0        | 0        | 13317636 |
| A0A024R6 | Serpin peptidase         | SERPINA4  | 616228.3 | 604710.8 | 659511.8 | 532935   | 800315.1 | 920445   |
| A0A024R6 | Serpin peptidase         | SERPINA5  | 126434.2 | 146973.2 | 139215.3 | 104449.6 | 146254.4 | 137026   |
| A0A024R6 | Serpin peptidase         | SERPINA3  | 36164300 | 24433930 | 28293586 | 19496176 | 17775796 | 37113560 |
| A0A024R6 | Matrix metalloproteinase | MMP2      | 15291.05 | 73115.8  | 17817.03 | 36320.44 | 12189.64 | 43894.32 |
| A0A024R7 | Angiopoietin             | ANGPTL6   | 12928.98 | 24138.15 | 9801.941 | 10143.95 | 15113.04 | 6306.196 |
| A0A024R7 | HCG20337                 | hCG_20337 | 12521.58 | 21885.79 | 24140.62 | 15080.92 | 12602.5  | 0        |
| A0A024R7 | Epididymis               | RAB3D     | 0        | 0        | 36100.7  | 0        | 0        | 0        |
| A0A024R8 | Tenascin                 | TNC       | 12601.42 | 8961.762 | 13612.62 | 14085.56 | 13777.1  | 8037.246 |
| A0A024R8 | ADAMTS-1                 | ADAMTSL1  | 4473.065 | 4913.106 | 0        | 2222.84  | 4563.015 | 0        |
| A0A024R8 | Prostaglandin            | PTGDS     | 111102.5 | 170158.3 | 129615   | 136480.3 | 70656.96 | 733073.4 |
| A0A024R8 | Protein disulfide        | P4HB      | 11665.71 | 16297.55 | 7536.876 | 38896.78 | 7965.111 | 8120.957 |
| A0A024R8 | Transmembrane            | TMC6      | 158230.3 | 117242.4 | 187165.1 | 42125.88 | 178200.1 | 18660.99 |
| A0A024R9 | Proteoglycan             | PRG4      | 96983.55 | 49105.38 | 70631.6  | 47694.19 | 68411.88 | 62042.91 |
| A0A024R9 | Serpin peptidase         | SERPINC1  | 11081714 | 8651911  | 9881892  | 8861331  | 8525448  | 11505727 |
| A0A024R9 | Plasma                   | PGCP      | 5166.463 | 3976.448 | 22355.08 | 0        | 0        | 10826.12 |
| A0A024R9 | Collectin                | siCOLEC10 | 89189.73 | 25883.16 | 29573.73 | 0        | 39887.53 | 20199.16 |
| A0A024R9 | RNA helicase             | AQR       | 292402.8 | 174198.7 | 196922   | 250373.1 | 281555.3 | 196698.4 |
| A0A024RA | Adiponectin              | C1QC      | 819340.3 | 1237184  | 1033879  | 960863.1 | 878223.1 | 957998.8 |
| A0A024RA | Heparan sulfate          | HSPG2     | 9270.033 | 11794.29 | 10286.04 | 11257.57 | 9877.753 | 8550.365 |
| A0A024RA | Adiponectin              | C1QB      | 1501023  | 1758039  | 1503851  | 1261729  | 1397863  | 2226874  |
| A0A024RA | Adiponectin              | C1QA      | 1505183  | 1795311  | 1525497  | 1104055  | 1220283  | 1473391  |
| A0A024RA | Matrix Gla               | MGP       | 57893.26 | 112696.2 | 89528.6  | 59629.07 | 95683.26 | 97613.35 |
| A0A024RB | RAP1B, member            | RAP1B     | 2322.489 | 0        | 0        | 6209.035 | 0        | 0        |
| A0A024RC | Amino                    | ANPEP     | 12539.39 | 21665.39 | 17265.61 | 24865.36 | 34574.49 | 24077.3  |
| A0A024RC | HCG19917                 | hCG_19917 | 16774.37 | 21468.04 | 33653.77 | 36347.14 | 41884.06 | 32090.15 |
| A0A024RD | G protein-coupled        | GPR116    | 9512.559 | 0        | 5839.514 | 0        | 0        | 0        |
| A0A024RD | Platelet-activating      | PLA2G7    | 15564.28 | 23006.45 | 15986.12 | 17691.03 | 29513.77 | 11993.66 |
| A0A024RD | Insulin-like             | IGFBP7    | 0        | 9752.52  | 0        | 0        | 0        | 641.9023 |
| A0A024RD | SPARC-like               | SPARCL1   | 0        | 14071.24 | 9229.142 | 12979.11 | 9224.014 | 22657.2  |

|          |                  |           |          |          |          |          |          |          |
|----------|------------------|-----------|----------|----------|----------|----------|----------|----------|
| A0A024RD | Periostin, c     | POSTN     | 10222.07 | 15035.34 | 11141.18 | 11676.46 | 15534.38 | 0        |
| A0A024RD | Lymphocyte       | LCP1      | 52579.79 | 55394.29 | 37432.55 | 32720.23 | 27869.06 | 45211.2  |
| A0A024RD | Lysosomal        | LAMP1     | 12992.53 | 19123.3  | 14337.07 | 13505.64 | 10150.43 | 32614.21 |
| A0A059Wf | MHC class        | HLA-B     | 5042.221 | 17602.87 | 0        | 0        | 0        | 0        |
| A0A068LK | Ig heavy chain   | variabl   | 8914271  | 11613176 | 12146971 | 11231438 | 14015646 | 7893515  |
| A0A068LK | Ig heavy chain   | variabl   | 796949   | 635888.5 | 206603   | 380862.3 | 380448.8 | 195606.9 |
| A0A068LK | Ig heavy chain   | variabl   | 38846.79 | 107320.1 | 44116.52 | 41971.98 | 28828.54 | 96654.42 |
| A0A068LK | Ig heavy chain   | variabl   | 371504.3 | 716831.1 | 839284.9 | 415319.4 | 375680.6 | 50194.25 |
| A0A068LL | Ig heavy chain   | variabl   | 149419.9 | 275828.2 | 176505.4 | 252357.9 | 252764.1 | 192048.8 |
| A0A068LN | Ig heavy chain   | variabl   | 174112.8 | 278663.4 | 188204.3 | 230438.5 | 275174.9 | 57082.21 |
| A0A068LN | Ig heavy chain   | variabl   | 3252230  | 4215748  | 1955638  | 3042468  | 3147298  | 1716602  |
| A0A068LN | Ig heavy chain   | variabl   | 758022.7 | 3495632  | 628813.4 | 1156384  | 1271920  | 1139269  |
| A0A068LR | Ig heavy chain   | variabl   | 0        | 0        | 0        | 40058.27 | 14524.86 | 48487.95 |
| A0A068LR | Ig heavy chain   | variabl   | 59686.71 | 285590.3 | 64948.63 | 208136.6 | 342394.1 | 474349.9 |
| A0A068LR | Ig heavy chain   | variabl   | 0        | 221288.4 | 14828.26 | 21766.04 | 85024.16 | 0        |
| A0A075B6 | Immunoglobulin   | IGKV3-7   | 507406.1 | 810519.4 | 688861.1 | 554549.9 | 675684.5 | 452462.2 |
| A0A075B6 | Immunoglobulin   | IGLV8-61  | 2331322  | 1384370  | 34306.4  | 932193   | 140708.1 | 43730.35 |
| A0A075B6 | Immunoglobulin   | IGLV7-46  | 125792.7 | 263399.7 | 124758.1 | 421222.8 | 236806.1 | 191247.6 |
| A0A075B6 | Immunoglobulin   | IGLV2-18  | 60519.2  | 135225.1 | 800604.4 | 90199.36 | 110101.4 | 105491.7 |
| A0A075B6 | Immunoglobulin   | IGLV3-16  | 363557.8 | 689878.8 | 531474.6 | 695143   | 473532.7 | 1050486  |
| A0A075B6 | Immunoglobulin   | IGLV3-12  | 0        | 0        | 0        | 8236.094 | 70365.29 | 0        |
| A0A075B6 | Immunoglobulin   | IGLV3-9   | 35834.36 | 9002.015 | 47073.11 | 23516.04 | 22526.04 | 68186.23 |
| A0A075B6 | Immunoglobulin   | IGHV3-64  | 332688.5 | 183796.5 | 470206.3 | 274612.7 | 201184.8 | 500482.8 |
| A0A075B6 | Immunoglobulin   | IGHV4-4   | 0        | 195153.7 | 0        | 95970.97 | 268875.2 | 214782.5 |
| A0A075B6 | Immunoglobulin   | IGKV2D-24 | 2276980  | 2639039  | 1769702  | 1026886  | 1568301  | 3053919  |
| A0A075B6 | Immunoglobulin   | IGKV2D-29 | 0        | 0        | 0        | 0        | 19638.87 | 12138.76 |
| A0A075B6 | Immunoglobulin   | IGKV2D-30 | 40342.05 | 46055.58 | 20599.9  | 17463.62 | 30151.76 | 51873.32 |
| A0A075B6 | Immunoglobulin   | IGKV1-37  | 127822.7 | 130687.5 | 132888.8 | 72325.5  | 128792.8 | 77101.56 |
| A0A075B7 | Immunoglobulin   | IGHV4OR1  | 0        | 0        | 0        | 4121.223 | 0        | 0        |
| A0A075B7 | GAS2-like        | GAS2L2    | 12788.65 | 51219.04 | 435868.9 | 30325.51 | 408102.9 | 472000.1 |
| A0A075B7 | Immunoglobulin   | IGHV3OR1  | 426713.3 | 457169.8 | 797663   | 663902.5 | 629963.4 | 66360.44 |
| A0A075B7 | Immunoglobulin   | IGHV1OR1  | 105340.3 | 92398.77 | 23242.44 | 36178.74 | 80301.08 | 38274.45 |
| A0A075B7 | Immunoglobulin   | IGKV1OR2  | 181198.9 | 217329.8 | 376860.9 | 160157.2 | 325073.9 | 179773.6 |
| A0A075B7 | Immunoglobulin   | IGHV3OR1  | 771589.1 | 1704475  | 353073   | 1040125  | 268842.5 | 594614.6 |
| A0A075B7 | Immunoglobulin   | IGHV3OR1  | 149175.1 | 309642.4 | 182040.6 | 590017.9 | 134967.8 | 243526.5 |
| A0A087Wf | Carboxypeptidase | CPB2      | 412746.2 | 310011.8 | 363821.3 | 295043.2 | 322103.3 | 296505.4 |
| A0A087Wf | Immunoglobulin   | IGKV3D-15 | 853311.4 | 1245007  | 1053461  | 904583.9 | 1237457  | 610818.6 |
| A0A087Wf | Immunoglobulin   | IGKV1D-8  | 215881.2 | 231321.6 | 0        | 0        | 111992.8 | 124220.4 |
| A0A087Wf | Receptor         | -IPTPRJ   | 0        | 44461.01 | 5878.406 | 0        | 7625.692 | 2212.395 |
| A0A087Wf | Neuroblastin     | NBL1      | 0        | 10015.16 | 0        | 0        | 10963.52 | 10196.8  |
| A0A087Wf | Cadherin         | -CDH1     | 10792.72 | 11871.02 | 12117.56 | 6498.097 | 21639.71 | 9986.97  |
| A0A087Wf | Neural cell      | NCAM1     | 13564.1  | 9770.898 | 7237.385 | 8029.119 | 0        | 18684.17 |
| A0A087Wf | Serum albumin    | ALB       | 0        | 15727.94 | 0        | 25030.64 | 46354.33 | 42428.11 |
| A0A087Wf | alpha-1,2-       | MAN1C1    | 0        | 0        | 0        | 0        | 0        | 0        |
| A0A087X0 | Neural cell      | CHL1      | 26071.29 | 28622.66 | 36068.09 | 27990.16 | 34052.5  | 27030.94 |
| A0A087X0 | Immunoglobulin   | IGKV2-40  | 62547.96 | 94306.25 | 69978.07 | 147434.8 | 41077.97 | 115255.9 |
| A0A087X0 | Cell adhesion    | CADM1     | 19104.71 | 0        | 15074.2  | 8555.906 | 15425.81 | 0        |
| A0A087X1 | Glutathione      | GPX3      | 360405.1 | 320847.4 | 272366.6 | 244554   | 299484.4 | 535606.4 |
| A0A087X1 | Aggrecan         | ACAN      | 4981.045 | 10953.11 | 0        | 34428.17 | 14484.81 | 0        |
| A0A090N7 | Retinoic acid    | RARRES2   | 44843.71 | 27681.02 | 38030.07 | 28627.34 | 27812.2  | 37210.35 |
| A0A0A0Mf | Coagulation      | F5        | 510872.2 | 292158.6 | 365157.7 | 335197.1 | 303064.4 | 294164.8 |
| A0A0A0Mf | Immunoglobulin   | IGHG1     | 0        | 584448.8 | 0        | 237177   | 778045.5 | 64340.24 |
| A0A0A0Mf | Immunoglobulin   | IGHV1-45  | 65474.13 | 35379.24 | 85844.4  | 48692.76 | 161774   | 67930.49 |
| A0A0A0Mf | Immunoglobulin   | IGHV3-49  | 950326   | 765339.4 | 804454.2 | 919661.8 | 589874.2 | 899523.6 |
| A0A0A0Mf | Eukaryotic       | EIF4G3    | 19097818 | 16931084 | 14445334 | 14023234 | 12472566 | 34094300 |
| A0A0A0Mf | Poliovirus       | PVR       | 4510.121 | 38765.2  | 32583.65 | 33478.8  | 0        | 0        |
| A0A0A0Mf | Sushi, von       | SVEP1     | 767260.9 | 9335.857 | 0        | 437372   | 12943.6  | 3784.402 |
| A0A0A0Mf | Peroxiredoxin    | PRDX1     | 2864.293 | 0        | 11823570 | 6153866  | 5039779  | 6450650  |

|          |                       |              |          |          |          |          |          |          |
|----------|-----------------------|--------------|----------|----------|----------|----------|----------|----------|
| A0A0A0M  | Immunogl              | IGKV6D-2     | 477216.5 | 1375185  | 1405744  | 651343.8 | 1591024  | 620862.8 |
| A0A0A0M  | Immunogl              | IGKJ1        | 0        | 670001.1 | 1002621  | 424152.6 | 400707.9 | 424179.5 |
| A0A0B4J1 | Immunogl              | IGHV6-1      | 1241840  | 1504818  | 4126896  | 3950930  | 1076755  | 1840771  |
| A0A0B4J1 | Immunogl              | IGHV2-26     | 50913.89 | 53690.8  | 70447.2  | 23377.83 | 63702.77 | 52238.49 |
| A0A0B4J1 | Immunogl              | IGHV3-73     | 79172.63 | 101939.7 | 74879.59 | 65510.34 | 112069.6 | 43371.3  |
| A0A0B4J1 | Immunogl              | IGHV3-74     | 2171581  | 4068723  | 1971592  | 1867971  | 2237423  | 2689142  |
| A0A0B4J1 | Immunogl              | IGHV3-43     | 0        | 0        | 289137.5 | 308070   | 478036.2 | 222683.5 |
| A0A0B4J1 | Immunogl              | IGLV9-49     | 186646.8 | 484275.7 | 232312.5 | 193589.8 | 178090.7 | 385922.8 |
| A0A0B4J1 | Immunogl              | IGHV3-72     | 623077.6 | 883172.3 | 792670.6 | 993195.4 | 466489.4 | 729381.9 |
| A0A0B4J2 | Immunogl              | IGHV3OR1     | 10365550 | 19067098 | 6084416  | 11333639 | 11661922 | 9325893  |
| A0A0B4J2 | Immunogl              | IGHV1OR1     | 49411.29 | 43243.06 | 66031.11 | 118508.7 | 96847.06 | 84931.73 |
| A0A0B4J2 | Immunogl              | IGKV1D-1     | 99359.63 | 167927.8 | 527930.8 | 78230.75 | 124817.6 | 143167.7 |
| A0A0B4J2 | Immunogl              | IGHV1-69     | 19995.86 | 0        | 55594.33 | 74122.52 | 50641.8  | 43786.62 |
| A0A0B4RL | Apolipop              | APOA5        | 12106.34 | 0        | 11431.18 | 14152.55 | 9833.096 | 5835.654 |
| A0A0C4DF | Cartilage             | aCRTAC1      | 51032.44 | 56829.77 | 46093.52 | 28260.63 | 34110.69 | 40328.38 |
| A0A0C4DC | Glycoprote            | GP1BA        | 60142.58 | 56961.93 | 60105.21 | 32346.81 | 77311.86 | 48321.7  |
| A0A0C4DF | Immunogl              | IGKV3D-2     | 3088244  | 5006378  | 4593071  | 4098063  | 5883879  | 4706519  |
| A0A0C4DF | Immunogl              | IGHV3-16     | 80792.57 | 96568.77 | 117575.2 | 69564.14 | 156447.6 | 154297.1 |
| A0A0C4DF | Immunogl              | IGHV1-18     | 66013.77 | 98384.4  | 57346.65 | 77208.1  | 74056.02 | 144734   |
| A0A0C4DF | Immunogl              | IGHV3-20     | 27544.54 | 68358.64 | 10260.51 | 16870.84 | 72102.88 | 41478.55 |
| A0A0C4DF | Immunogl              | IGHV3-35     | 4932757  | 4062148  | 3011514  | 1039693  | 3049365  | 2462230  |
| A0A0C4DF | Immunogl              | IGHV3-38     | 326368.6 | 336672.8 | 339023.1 | 304620.8 | 323494.3 | 330039.6 |
| A0A0C4DF | Immunogl              | IGHV1-58     | 0        | 383077.8 | 0        | 41637.41 | 0        | 0        |
| A0A0C4DF | Immunogl              | IGHV2-70     | 66034.32 | 2285177  | 31289.46 | 28129.06 | 910455.9 | 51026.79 |
| A0A0C4DF | Immunogl              | IGKV1-8      | 1975612  | 2822329  | 2255976  | 4304595  | 2442524  | 1473945  |
| A0A0D9SC | Lymphocy              | LCP2         | 0        | 231331   | 258971.5 | 137293.3 | 30068.66 | 0        |
| A0A0F7G8 | Plasminog             | PLG          | 29781.63 | 33158.32 | 39254.47 | 39591.08 | 40875.66 | 32034.97 |
| A0A0F7T8 | IGHV5-51              | IGHV5-51     | 35804.09 | 91300.86 | 29338.62 | 35120.13 | 64557.78 | 83323.88 |
| A0A0F7T9 | IGHV4-39              | IGHV4-39     | 1063339  | 2514508  | 2130326  | 2580317  | 2458752  | 1135910  |
| A0A0F7T9 | IGHV1-2               | pIGHV1-2     | 31743.71 | 77957.77 | 36094.16 | 36699.43 | 0        | 0        |
| A0A0F7TC | IGHV4-4               | pIGHV4-4     | 734408.5 | 1881549  | 1473344  | 1830706  | 369058.1 | 253366   |
| A0A0F7TD | IGHV3-7               | pIGHV3-7     | 42870.9  | 159967.1 | 104580.4 | 58310.67 | 130870.5 | 132760.3 |
| A0A0G2JN | Immunogl              | IGHV1-69     | 27228.86 | 0        | 55594.32 | 48447.93 | 52992.02 | 31602.29 |
| A0A0G2JN | Heterogen             | HNRNPCL      | 28537.08 | 53485.55 | 21445.18 | 0        | 0        | 42080.21 |
| A0A0G2JR | Uncharacterized prote |              | 393508.3 | 2017082  | 900306.8 | 746579.6 | 906551.1 | 495951.7 |
| A0A0H5A  | L-selectin            | SELL         | 57862.61 | 48547.3  | 42689.22 | 33853.02 | 32844.49 | 104607.1 |
| A0A0J9YV | Immunogl              | IGHV7-4      | 5009.578 | 0        | 0        | 0        | 20543.62 | 28116.32 |
| A0A0J9YW | Uncharacterized prote |              | 59877.25 | 19524.66 | 0        | 82999.55 | 8748.699 | 2670.05  |
| A0A0J9YX | Immunogl              | IGHV3-64     | 1160507  | 2117412  | 660739.6 | 2395986  | 1383492  | 1181157  |
| A0A0J9YX | Immunogl              | IGHV5-10     | 389596.9 | 954797.1 | 407655.1 | 678278.1 | 539251.9 | 1399016  |
| A0A0J9YY | Uncharacterized prote |              | 305147.8 | 283955.3 | 263030.2 | 248971.5 | 170839.4 | 93928.05 |
| A0A0K0K1 | Epididymis            | HEL-S-26     | 38004.98 | 58436.79 | 25565.8  | 58993.16 | 62408.92 | 41663.3  |
| A0A0K0K1 | Cystatin              | HEL-S-2      | 134411.5 | 171328.6 | 148176.2 | 118470.4 | 150591.3 | 163770   |
| A0A0K2BN | Mutant he             | HBA2         | 87044.34 | 93882.73 | 258809.2 | 129107   | 131286.4 | 233252.7 |
| A0A0M3KI | Fab Hu                | 15C1 Heavy c | 182229.2 | 105013.5 | 603901.6 | 112805.8 | 413329.1 | 192038.9 |
| A0A0R7FJ | Coagulatic            | F12          | 0        | 0        | 47317.57 | 0        | 0        | 29150.39 |
| A0A0S2Z3 | Apolipop              | APOE         | 5466810  | 5817574  | 5076818  | 3225840  | 6066328  | 4039833  |
| A0A0S2Z3 | Cholestery            | CETP         | 49031.59 | 62439.78 | 43675.31 | 56528.95 | 72724.76 | 73879.69 |
| A0A0S2Z3 | Lectin gala           | LGALS3BP     | 253509.1 | 158966.7 | 113949.8 | 81769.62 | 130231.9 | 182582.1 |
| A0A0S2Z4 | HCG20398              | KRT6A        | 47572.15 | 50595.11 | 263103.2 | 154649.4 | 144371.4 | 98778.63 |
| A0A0S2Z4 | EGF contai            | EFEMP1       | 254951.6 | 275526.5 | 255763.9 | 236733.4 | 406503.9 | 160771.9 |
| A0A0S2Z4 | Compleme              | CFP          | 185153.9 | 172742.7 | 188167.5 | 170283.7 | 181468.4 | 175458   |
| A0A0S2Z4 | Protein S             | i;PROS1      | 1233484  | 831097.5 | 1007485  | 919527.9 | 940280.8 | 842732.9 |
| A0A0S2Z4 | Transformi            | TGFBI        | 82359.38 | 25150.85 | 41056.85 | 35107.65 | 36664.88 | 34856.94 |
| A0A0U1RC | CLIP-assoc            | CLASP2       | 630057.4 | 432220.2 | 658565   | 482142.8 | 466052.1 | 592447.5 |
| A0A0U1RC | Endothelia            | PROCR        | 0        | 7596.02  | 0        | 0        | 33612.95 | 16799.45 |
| A0A0U4ER | Haptoglob             | HP           | 669857.8 | 515246.1 | 1031408  | 805107.9 | 401033.5 | 0        |
| A0A0X9T0 | GCT-A5                | heavy chain  | 10457.83 | 20460.93 | 13916.64 | 23383.86 | 0        | 12918.91 |

|                                   |          |          |          |          |          |          |
|-----------------------------------|----------|----------|----------|----------|----------|----------|
| A0A0X9T0 IBM-A2 light chain va    | 548437.3 | 834341.8 | 479737.6 | 562146.8 | 764687.4 | 510692.5 |
| A0A0X9T7 MS-D3 heavy chain v      | 94720.26 | 81306.72 | 105623.4 | 29161.03 | 75115.13 | 173193.6 |
| A0A0X9T7 GCT-A4 light chain va    | 9679469  | 11915599 | 13844397 | 9834430  | 12820586 | 15530982 |
| A0A0X9T7 IBM-A2 heavy chain v     | 76560.41 | 270558   | 98411.42 | 71606.27 | 60911.64 | 115450.4 |
| A0A0X9TD MS-D1 light chain var    | 9693570  | 13638590 | 11449428 | 11199152 | 12543686 | 13722224 |
| A0A0X9US MS-A6 heavy chain v.     | 109894.9 | 142317.1 | 126495.1 | 98997.34 | 35044.07 | 40341.87 |
| A0A0X9US GCT-A4 heavy chain v     | 133615   | 114901.1 | 897054   | 139793.2 | 89967.3  | 297804.7 |
| A0A0X9UV MS-B1 light chain var    | 47372.63 | 79342.22 | 168009.6 | 38056.79 | 65779.49 | 35878.13 |
| A0A0X9UV MS-D4 heavy chain v      | 1176869  | 1871658  | 1328855  | 1877988  | 1316530  | 8296637  |
| A0A0X9UV GCT-A5 light chain va    | 8586194  | 10741194 | 10771289 | 10693797 | 11202946 | 8404120  |
| A0A0X9UV IBM-A3 heavy chain v     | 75835.77 | 263073   | 114177   | 170855.9 | 122533.6 | 200074.9 |
| A0A0X9V9 MS-C3 heavy chain v.     | 0        | 28105.88 | 76032.11 | 31924.79 | 51921.45 | 40959.62 |
| A0A0X9V9 MS-F1 light chain var    | 801123.4 | 2839998  | 1203902  | 2177400  | 1706438  | 1370333  |
| A0A0X9V9 IBM-B2 light chain va    | 168451.7 | 366334.1 | 80575.53 | 148037.7 | 178472.5 | 443940.7 |
| A0A109PP MS-C2 light chain var    | 130377.5 | 1352164  | 200612.1 | 1020570  | 174093.6 | 787538.6 |
| A0A109PS MS-A1 heavy chain v.     | 219624.5 | 237169.3 | 24076048 | 30458118 | 15790871 | 20149832 |
| A0A109PS MS-D1 heavy chain v      | 27246.28 | 28888.23 | 14259.84 | 10821.22 | 0        | 2680.559 |
| A0A109PS GCT-A8 light chain va    | 995412.2 | 600128.1 | 384528   | 437685.6 | 1042974  | 480804.6 |
| A0A109PS MS-A1 light chain var    | 1988854  | 3672434  | 2666780  | 1620317  | 1943845  | 2029663  |
| A0A109PT GCT-A9 heavy chain v     | 39734.18 | 40751.43 | 66223.23 | 62016.09 | 44573.09 | 50708.43 |
| A0A109PV GCT-A6 heavy chain v     | 236693.5 | 413137.9 | 196229   | 217638.7 | 345211.7 | 267304.9 |
| A0A109PV MS-C1 light chain var    | 0        | 102506.2 | 97471.85 | 71921.05 | 16443.61 | 29230.25 |
| A0A109PV IBM-B3 light chain va    | 1062441  | 1678586  | 1687169  | 1176906  | 1131467  | 805468.8 |
| A0A120HF MS-E1 light chain var    | 569501.9 | 681318.5 | 821446.3 | 261037   | 251656.9 | 510452.7 |
| A0A120HF IBM-A1 heavy chain v     | 203025.9 | 132052.2 | 170700.2 | 265469.2 | 245862   | 313745.6 |
| A0A120HC MS-E1 heavy chain va     | 111605.3 | 94786.66 | 236375.8 | 100549.3 | 119001.5 | 364593.8 |
| A0A125QY GCT-A6 light chain va    | 0        | 0        | 329572.1 | 0        | 285738.7 | 0        |
| A0A125QY GCT-A7 heavy chain v     | 2022977  | 1651715  | 1928524  | 3235393  | 2189248  | 4395950  |
| A0A125QY GCT-A9 light chain va    | 1755966  | 4394083  | 3570939  | 2637553  | 3382513  | 2541577  |
| A0A125QY IBM-B2 heavy chain v     | 2515532  | 3037551  | 3959000  | 1910470  | 3522983  | 1496249  |
| A0A125U0 MS-A4 heavy chain v.     | 322841.1 | 913693.7 | 76295.13 | 107243.1 | 655719.3 | 247297.8 |
| A0A125U0 MS-A4 light chain var    | 161455.8 | 153277.6 | 139807.6 | 122559   | 185794.6 | 142233.5 |
| A0A125U0 MS-C1 heavy chain v.     | 158142.9 | 52824.84 | 160993   | 52615.45 | 82283.24 | 181833.7 |
| A0A125U0 MS-C3 light chain var    | 0        | 91573.26 | 177755.1 | 144617.7 | 0        | 0        |
| A0A125U0 MS-C4 heavy chain v.     | 277213.8 | 431241.8 | 461305.3 | 498155.2 | 637345   | 465189.2 |
| A0A125U0 MS-F1 heavy chain va     | 618052.2 | 810392.9 | 798313.9 | 826310.9 | 527457.6 | 385427.7 |
| A0A125U0 GCT-A1 heavy chain v     | 1368186  | 3230741  | 3768491  | 3146894  | 1210523  | 2357053  |
| A0A125U0 GCT-A2 heavy chain v     | 1035829  | 677386.1 | 214193.3 | 746515.4 | 792791.9 | 687398.8 |
| A0A140T8 Tenascin->TNXB           | 28926.13 | 30626.02 | 31776.04 | 23612.42 | 28635.87 | 20442.86 |
| A0A140VJI Testicular tissue prote | 398189.7 | 329352.6 | 359816.9 | 378333.1 | 724486.1 | 645336.4 |
| A0A140VJI Testicular tissue prote | 42703.8  | 32277.09 | 46120.57 | 31276.98 | 42693.49 | 5370.252 |
| A0A140VJI Testicular tissue prote | 13925.91 | 36755.87 | 0        | 7294.837 | 20856.53 | 25979.39 |
| A0A140VJI Superoxide dismutase    | 28229.64 | 22070.29 | 37686.42 | 21931.88 | 20913.2  | 13107.54 |
| A0A140VK Testicular tissue prote  | 7070757  | 4965817  | 5595744  | 4154631  | 4831628  | 6198444  |
| A0A140VK Testicular secretory pi  | 266353.5 | 239242.6 | 268738.4 | 216368.9 | 284456.1 | 260316.9 |
| A0A140VK Staphylocc SND1          | 0        | 0        | 6676.53  | 0        | 0        | 8474.344 |
| A0A140VK Sulfhydryl QSCN6         | 83816.9  | 72997.14 | 83263.58 | 75742.51 | 87341.16 | 73371.61 |
| A0A140VK Testis tissue sperm-bi   | 2094677  | 1550263  | 2103065  | 1482485  | 1578827  | 1306969  |
| A0A146E5 Mesenchym Mefflin        | 0        | 0        | 0        | 0        | 12515.53 | 0        |
| A0A161I2C Lactoferrin LTF         | 25174.8  | 40595.94 | 34811.4  | 107107.9 | 86673.42 | 18302.46 |
| A0A182DV Selenoprotein SELENOP    | 586491.4 | 481008.7 | 482184.1 | 299567.6 | 542044.4 | 466062.9 |
| A0A193CF 10E8 heavy chain vari    | 3546589  | 5197096  | 3078583  | 3475732  | 2744635  | 6630225  |
| A0A193CF 10E8 heavy chain vari    | 77188.59 | 64131.41 | 138183.7 | 55360.56 | 128366.9 | 117595.9 |
| A0A193CF 10E8 light chain varia   | 0        | 217570.4 | 0        | 128020.6 | 123921.5 | 0        |
| A0A193CF 10E8 light chain varia   | 273934   | 89366.2  | 35714.73 | 118670.4 | 227338.4 | 399851.4 |
| A0A1B0GT Uncharacter C3orf85      | 4027.489 | 0        | 8969.437 | 4247.701 | 2372.694 | 3902.848 |
| A0A1B0GL Testis-express TEX51     | 3973154  | 2626320  | 3207390  | 1991222  | 2066213  | 3965457  |
| A0A1B0GV Cathepsin CTSD           | 21094.3  | 20944.6  | 18758.68 | 20666.78 | 42079.63 | 12177.02 |



|                                 |          |          |          |          |          |          |
|---------------------------------|----------|----------|----------|----------|----------|----------|
| A0A1B1CY Vitamin D Gc           | 2628446  | 0        | 2196043  | 2208548  | 0        | 9164.629 |
| A0A1C9J6I B cell receptor kappa | 247971.3 | 283433.1 | 361504.2 | 262214.8 | 237004.2 | 413098.9 |
| A0A1C9J6I B cell receptor heavy | 821168   | 1740897  | 547354.4 | 1821339  | 756118.2 | 487259.3 |
| A0A1C9J6I B cell receptor heavy | 259542.1 | 411720.7 | 228757.1 | 2692124  | 1364190  | 225694.3 |
| A0A1C9J6I B cell receptor kappa | 149561.6 | 298745.1 | 264495.1 | 221732.1 | 204941.2 | 196348.9 |
| A0A1C9J6I B cell receptor heavy | 93306.3  | 424032   | 183448.1 | 217142.5 | 254910.8 | 237569.8 |
| A0A1K0GX Globin C1 GLNC1        | 2403465  | 865643   | 2660839  | 1352362  | 1844180  | 2247191  |
| A0A1L2BU Anti-staphylococcal e  | 129746.4 | 292244   | 110590.1 | 58331.99 | 107299.7 | 95031.65 |
| A0A1L2BU Anti-staphylococcal e  | 456615.4 | 625532.6 | 488375.5 | 639138.6 | 677425.7 | 524180.7 |
| A0A1L2BU Anti-staphylococcal e  | 289739.2 | 486252   | 173088.4 | 155753.2 | 367498.6 | 100267.8 |
| A0A1L2BU Anti-staphylococcal e  | 14768.23 | 84783.73 | 28565.58 | 46372.5  | 42803.32 | 17755.81 |
| A0A1L2BU Anti-staphylococcal e  | 731612.4 | 1071558  | 1323576  | 1783195  | 1188031  | 1289396  |
| A0A1L2BU Anti-staphylococcal e  | 145078.6 | 130661.5 | 102405.5 | 125695.5 | 99760.51 | 73578.67 |
| A0A1L2BU Anti-staphylococcal e  | 35759.44 | 468956.7 | 70693.57 | 98479.91 | 550121.1 | 103563.5 |
| A0A1L2BU Anti-staphylococcal e  | 65554.98 | 62950.14 | 21101.73 | 0        | 0        | 26464.64 |
| A0A1L2BU Anti-staphylococcal e  | 0        | 29238.82 | 0        | 15110.15 | 20353.61 | 0        |
| A0A1S5UZ Talin-1 TLN1           | 532822.3 | 36433.5  | 11253.88 | 31952.51 | 1364793  | 44734.41 |
| A0A1S5UZ Target of MABI3BP      | 28750.1  | 28629.21 | 18279.71 | 23634.67 | 33628.08 | 18493.84 |
| A0A1S5UZ Receptor-iPTPRA        | 13744.22 | 16968.63 | 27149.8  | 21861.62 | 67027.52 | 8142.338 |
| A0A1S5UZ Macrophage MARCO       | 17335.8  | 15514.99 | 13314.67 | 0        | 19603.24 | 0        |
| A0A1U9W Insulin-like growth fa  | 6224.015 | 0        | 17602.8  | 12404.42 | 15878.64 | 8624.972 |
| A0A1U9X8 C2                     | 601744.3 | 458066   | 595889.9 | 367081.9 | 439161.5 | 528901.8 |
| A0A1W2P(Fc of IgG I) FCGR3A     | 41049.41 | 54878.33 | 40218.26 | 24772.11 | 36835.48 | 67954.48 |
| A0A1W6IY N90-VRC38.08 heavy     | 392663.8 | 961591   | 586611.4 | 748724.4 | 344977.5 | 498474.9 |
| A0A1W6IY N90-VRC38.07 heavy     | 572551.9 | 825945.6 | 579065.5 | 847843.1 | 406870   | 744353.1 |
| A0A1W6IY N90-VRC38.10 heavy     | 770538.1 | 714751.3 | 295116.3 | 223456.8 | 340819   | 192611   |
| A0A1W6IY N90-VRC38.04 heavy     | 74601.05 | 1455483  | 414924.6 | 536512.9 | 526639.1 | 153279.6 |
| A0A1W6IY N90-VRC38.03 heavy     | 611801.4 | 585466.3 | 546068.3 | 615222.4 | 662851.9 | 331706.4 |
| A0A1W6IY N90-VRC38.09 heavy     | 343621.9 | 528758.6 | 641687.8 | 738044.1 | 541428.9 | 453316.4 |
| A0A1W6IY N90-VRC38.05 heavy     | 219715.5 | 22986.53 | 48225.71 | 19984.61 | 47770.48 | 306265.2 |
| A0A1W6IY N90-VRC38.03 light c   | 52855.13 | 86080.36 | 23585.39 | 184309.4 | 62379.87 | 35519.32 |
| A0A1W6IY N90-VRC38.11 heavy     | 2788583  | 2988644  | 1624386  | 2056475  | 3819652  | 4047727  |
| A0A1W6IY N90-VRC38.06 heavy     | 506633.8 | 259459.9 | 0        | 0        | 299362.1 | 752378.8 |
| A0A1W6IY N90-VRC38.05 light c   | 0        | 53022.05 | 0        | 89212.97 | 117223   | 0        |
| A0A1W6IY N90-VRC38.01 light c   | 169384.2 | 260533.8 | 137460.5 | 307283.3 | 615344.7 | 1131195  |
| A0A1W6IY N90-VRC38.06 light c   | 219514.6 | 478746.5 | 898128.4 | 211339.8 | 350387.8 | 1523982  |
| A0A1W6IY N90-VRC38.11 light c   | 646702.2 | 1395663  | 270399.2 | 439153.2 | 1709492  | 1171025  |
| A0A1W6IY N90-VRC38.09 light c   | 253578.9 | 288635.3 | 290890.6 | 1172421  | 1700443  | 539789.6 |
| A0A1W6IY N90-VRC38.07 light c   | 161319.9 | 258362.2 | 175930.6 | 309100.1 | 452488.8 | 533485.5 |
| A0A1W6IY N90-VRC38.08 light c   | 107677   | 171116   | 237222.6 | 107476.2 | 197426.7 | 638355.2 |
| A0A1Z1VX CD44 prot: CD44        | 152317.5 | 127633.1 | 98675.21 | 102169.3 | 123593.2 | 80672.97 |
| A0A223FL(MHC class HLA-A        | 0        | 0        | 4991.571 | 0        | 0        | 64348.03 |
| A0A248RC 40S ribosomal proteir  | 23108.38 | 24621.06 | 20408.12 | 21548.39 | 30150.69 | 32569.48 |
| A0A286YE Immunoglobulin IGHG3   | 30165668 | 35950988 | 32434816 | 16543170 | 16942030 | 14855433 |
| A0A286YE Immunoglobulin IGHG2   | 60882208 | 72627928 | 27374074 | 67929320 | 67886776 | 47151564 |
| A0A290WI Hepsidin a hamp        | 29125.61 | 11867.35 | 0        | 11841.28 | 10850.36 | 0        |
| A0A2R2Y2 Tropomyosin TPM3nu     | 15311.51 | 12013.83 | 10002.2  | 13051.52 | 12309.76 | 10217.54 |
| A0A2R8Y5 Protein 4.1 EPB41      | 0        | 6191.732 | 0        | 0        | 0        | 5927.111 |
| A0A2R8Y5 Radixin RDX            | 0        | 101396.3 | 81079.05 | 24447.74 | 231561.6 | 0        |
| A0A2R8Y5 Tropomyosin TPM4       | 58159.62 | 10462.55 | 5446.87  | 40995.32 | 55720.58 | 22261.78 |
| A0A2R8Y7 Uncharacterized prot:  | 18332.71 | 30078.15 | 18535.3  | 12218.76 | 25388.14 | 40864.37 |
| A0A2S1ZA KL4-1 (Fragment)       | 0        | 23316.35 | 34663.8  | 20622.62 | 43655.97 | 28294.6  |
| A0A2U3TZ CD59 glyco: CD59       | 2938.565 | 0        | 1457.619 | 2003.412 | 2695.108 | 2116.161 |
| A0A2U8J8I Ig heavy cI IgH       | 0        | 156406.4 | 0        | 0        | 0        | 0        |
| A0A2U8J8I Ig heavy cI IgH       | 46315.8  | 54781.98 | 126282.9 | 69607.48 | 0        | 71424.44 |
| A0A2U8J8I Ig heavy cI IgH       | 186456.4 | 123250.9 | 85309.74 | 72794.77 | 219747.2 | 120840.6 |
| A0A2U8J8I Ig heavy cI IgH       | 0        | 0        | 5776.362 | 0        | 0        | 0        |
| A0A2U8J8I Ig heavy cI IgH       | 519220.1 | 645356.4 | 378021.3 | 399243.6 | 116232.5 | 347973.8 |

|                         |          |          |          |          |          |          |
|-------------------------|----------|----------|----------|----------|----------|----------|
| A0A2U8J8 lg heavy c lgH | 129460.8 | 184391   | 113978.6 | 128989.9 | 359743.4 | 141107.5 |
| A0A2U8J8.lg heavy c lgH | 0        | 61142.18 | 78765.83 | 69596.85 | 78685.55 | 157029.5 |
| A0A2U8J8.lg heavy c lgH | 3447560  | 5678065  | 7432544  | 8148280  | 4218745  | 6516126  |
| A0A2U8J8.lg heavy c lgH | 163590.1 | 425381.8 | 194184   | 326151.7 | 264069.1 | 418341   |
| A0A2U8J8.lg heavy c lgH | 627705.2 | 1620749  | 800285   | 1073683  | 1064387  | 1925435  |
| A0A2U8J8 lg heavy c lgH | 152028.3 | 189852.1 | 149539.6 | 172917.2 | 111802.3 | 42904.42 |
| A0A2U8J8 lg heavy c lgH | 83002.31 | 120453.6 | 153761.8 | 132392.9 | 73496.85 | 242458.4 |
| A0A2U8J8 lg heavy c lgH | 0        | 7840.846 | 8888.253 | 7196.861 | 4364.542 | 0        |
| A0A2U8J8 lg heavy c lgH | 263797.5 | 222453.9 | 457480.9 | 198231.3 | 174145.4 | 326665.8 |
| A0A2U8J8 lg heavy c lgH | 221658.2 | 1079276  | 944840.9 | 168244.1 | 642781.1 | 1598409  |
| A0A2U8J8 lg heavy c lgH | 0        | 195860.1 | 220493.9 | 229443.1 | 120951.9 | 250031.2 |
| A0A2U8J8 lg heavy c lgH | 41063.39 | 76216.74 | 132782.7 | 109814.7 | 19050.29 | 95005.09 |
| A0A2U8J8 lg heavy c lgH | 35421.65 | 60136.28 | 88480.26 | 6561.729 | 0        | 35294.43 |
| A0A2U8J8 lg heavy c lgH | 1570517  | 29016.11 | 787101.6 | 209155.3 | 651800.3 | 6746196  |
| A0A2U8J8 lg heavy c lgH | 50863.21 | 111991.4 | 50025.73 | 81598.55 | 50239.83 | 117491.7 |
| A0A2U8J8 lg heavy c lgH | 42398.1  | 55364.79 | 40378.68 | 126324.2 | 60027.63 | 69615.45 |
| A0A2U8J8 lg heavy c lgH | 313697.6 | 155719.7 | 89224.42 | 51843.95 | 0        | 0        |
| A0A2U8J8 lg heavy c lgH | 1575772  | 1988013  | 1589472  | 1351980  | 2177472  | 2155110  |
| A0A2U8J8 lg heavy c lgH | 136728.3 | 221884.4 | 166700.3 | 290853.4 | 183440.8 | 62110.6  |
| A0A2U8J8 lg heavy c lgH | 17433.09 | 23683.01 | 10025.94 | 14228.22 | 8720.881 | 0        |
| A0A2U8J8 lg heavy c lgH | 0        | 64001.66 | 31078.31 | 36985.51 | 38360.7  | 94560.08 |
| A0A2U8J8 lg heavy c lgH | 10493.23 | 10171.28 | 0        | 115260.6 | 28669.13 | 3146.786 |
| A0A2U8J8 lg heavy c lgH | 202896.4 | 274074.2 | 190908.5 | 228436.5 | 294334.5 | 255227.4 |
| A0A2U8J8 lg heavy c lgH | 700144.3 | 606866.2 | 386554.7 | 459434.8 | 1245417  | 642590.3 |
| A0A2U8J8 lg heavy c lgH | 238181.3 | 173661.6 | 368469.2 | 170852.5 | 257456.2 | 393231.5 |
| A0A2U8J8 lg heavy c lgH | 16757.72 | 0        | 10564.75 | 0        | 0        | 26680.21 |
| A0A2U8J8 lg heavy c lgH | 2448988  | 3164284  | 5044518  | 3119394  | 3051457  | 2922767  |
| A0A2U8J8 lg heavy c lgH | 391468.7 | 435227.1 | 346952.2 | 170582.5 | 173090.8 | 217042.4 |
| A0A2U8J8 lg heavy c lgH | 523197.7 | 516281.8 | 317154.6 | 355658.9 | 267018.5 | 353037.2 |
| A0A2U8J8 lg heavy c lgH | 1342127  | 2817630  | 129334.8 | 2308388  | 2620918  | 3264814  |
| A0A2U8J8 lg heavy c lgH | 482334.9 | 1168244  | 802948.2 | 1065857  | 915523.8 | 1699143  |
| A0A2U8J8 lg heavy c lgH | 32829.94 | 53562.56 | 89219.9  | 111693.3 | 162604   | 110029.3 |
| A0A2U8J8.lg heavy c lgH | 57008.33 | 100351.6 | 35676.96 | 55019.5  | 70788.02 | 30993.2  |
| A0A2U8J8.lg heavy c lgH | 6257     | 46614.08 | 0        | 4497.743 | 0        | 9054.662 |
| A0A2U8J8.lg heavy c lgH | 343531.4 | 212049.9 | 342400.5 | 204820.8 | 332355.6 | 115367.2 |
| A0A2U8J8.lg heavy c lgH | 277413.3 | 414960   | 391983.4 | 436745   | 451797.3 | 241422.5 |
| A0A2U8J9 lg heavy c lgH | 0        | 115742.4 | 76078.77 | 40559.61 | 75831.44 | 0        |
| A0A2U8J9.lg heavy c lgH | 0        | 0        | 168670.8 | 260396.2 | 0        | 0        |
| A0A2U8J9.lg heavy c lgH | 87336.55 | 99069.66 | 171485.6 | 147127.7 | 46222.39 | 98731.35 |
| A0A2U8J9.lg heavy c lgH | 24930.55 | 98260.93 | 28762.65 | 41795.82 | 43514.91 | 127000.6 |
| A0A2U8J9.lg heavy c lgH | 707743   | 1495634  | 949316.1 | 2032729  | 763905.1 | 767891.5 |
| A0A2U8J9.lg heavy c lgH | 126918.1 | 0        | 215458.9 | 194465.4 | 243097.3 | 154146.3 |
| A0A2U8J9.lg heavy c lgH | 638838.9 | 1154517  | 346357   | 1313252  | 366196.9 | 133486.3 |
| A0A2U8J9.lg heavy c lgH | 11416.04 | 10152.66 | 9420.195 | 13344.65 | 12585.23 | 14701.82 |
| A0A2U8J9.lg heavy c lgH | 117296.9 | 94689.87 | 51759.2  | 204262.1 | 64359.72 | 620314.4 |
| A0A2U8J9.lg heavy c lgH | 0        | 0        | 10219.49 | 31106.18 | 29058.58 | 16094.13 |
| A0A2U8J9.lg heavy c lgH | 927243.8 | 1041655  | 425757.3 | 608232.1 | 553656.6 | 356658.6 |
| A0A2U8J9.lg heavy c lgH | 343789.5 | 506408.3 | 351589.9 | 13240.26 | 475613.5 | 402011.6 |
| A0A2U8J9.lg heavy c lgH | 5616540  | 10114599 | 7168186  | 7099413  | 6354454  | 13318190 |
| A0A2U8J9.lg heavy c lgH | 454566.8 | 250590   | 325838.4 | 231961.1 | 423308   | 409794.4 |
| A0A2U8J9.lg heavy c lgH | 188739.6 | 575089.6 | 819883.1 | 757949.5 | 664848.7 | 385865.3 |
| A0A2U8J9.lg heavy c lgH | 1411082  | 455129.6 | 461515.7 | 595433.7 | 327595.7 | 3097938  |
| A0A2U8J9.lg heavy c lgH | 231494.2 | 134585.6 | 214765.7 | 117980.5 | 84055.9  | 486791.3 |
| A0A2U8J9.lg heavy c lgH | 94041.44 | 92023.4  | 111996.7 | 61082.29 | 53779.92 | 71575.47 |
| A0A2U8J9.lg heavy c lgH | 170243.2 | 130586.6 | 347804.6 | 99669.26 | 124047.5 | 90222.7  |
| A0A2U8J9.lg heavy c lgH | 330122.5 | 171120.5 | 348590.7 | 244128.5 | 444333.3 | 69722.59 |
| A0A2U8J9 lg heavy c lgH | 175975.6 | 201872   | 328697.6 | 145029.2 | 177504.6 | 163656.7 |
| A0A2U8J9 lg heavy c lgH | 750202.7 | 1798861  | 555493.9 | 736994   | 1059597  | 506838.5 |

|                                 |          |          |          |          |          |          |
|---------------------------------|----------|----------|----------|----------|----------|----------|
| A0A2U8J9 lg heavy c lgH         | 695590.4 | 2181092  | 563064.8 | 99231.02 | 875335   | 583412.1 |
| A0A2U8J9 lg heavy c lgH         | 300776.2 | 32712.42 | 75366.16 | 133885.1 | 374756.8 | 59263.82 |
| A0A2U8J9 lg heavy c lgH         | 27629.13 | 0        | 122819.8 | 36924.73 | 70370.86 | 0        |
| A0A2U8J9 lg heavy c lgH         | 1500597  | 1886179  | 3028802  | 3737306  | 3140958  | 950706.8 |
| A0A2U8J9 lg heavy c lgH         | 6993.839 | 14413.49 | 5568.763 | 11824.89 | 19347.38 | 10540.66 |
| A0A2U8J9 lg heavy c lgH         | 77417.48 | 114458.9 | 0        | 92270.89 | 104708.3 | 94017.84 |
| A0A2U8J9 lg heavy c lgH         | 13857.13 | 90505.11 | 35818.04 | 126594.1 | 52195.95 | 56439.42 |
| A0A2U8J9 lg heavy c lgH         | 0        | 0        | 72554.03 | 0        | 19528.14 | 0        |
| A0A2U8J9 lg heavy c lgH         | 2364533  | 1063898  | 721943.4 | 714692.7 | 1163498  | 1112146  |
| A0A2U8J9 lg heavy c lgH         | 74688.41 | 441170   | 0        | 11770.52 | 0        | 380730.1 |
| A0A2U8J9 lg heavy c lgH         | 45721.32 | 43908.33 | 23636.92 | 30109.27 | 42355.11 | 48381.78 |
| A0A2U8J9 lg heavy c lgH         | 54413.33 | 125802   | 3617.527 | 8376.963 | 4861.029 | 53205.67 |
| A0A2U8J9 lg heavy c lgH         | 784774.8 | 2228278  | 1200250  | 1710378  | 968377   | 1095833  |
| A0A2U8J9 lg heavy c lgH         | 27618.55 | 237842.4 | 34399.29 | 42255.34 | 54048.75 | 41573.12 |
| A0A2U8J9 lg heavy c lgH         | 40194.68 | 83204.1  | 94705.2  | 33926.15 | 47050.39 | 82239.77 |
| A0A2U8J9 lg heavy c lgH         | 0        | 53770.56 | 61452.19 | 0        | 17202.4  | 0        |
| A0A2U8J9 lg heavy c lgH         | 2266927  | 1006114  | 783399.4 | 681093.8 | 1119419  | 116393.5 |
| A0A2U8J9 lg heavy c lgH         | 310184.5 | 335839.7 | 317822.6 | 522547.8 | 595177.9 | 17573.67 |
| A0A2U8J9 lg heavy c lgH         | 1248053  | 2934343  | 438541   | 2872029  | 1251907  | 2142934  |
| A0A2U8J9 lg heavy c lgH         | 260351.1 | 563199   | 146310   | 91582.16 | 268065.9 | 221486.2 |
| A0A2U8J9 lg heavy c lgH         | 0        | 0        | 0        | 23858.19 | 0        | 0        |
| A0A2U8J9 lg heavy c lgH         | 13799.93 | 19968.02 | 12261.61 | 19176.03 | 12668.41 | 15173.21 |
| A0A2U8J9 lg heavy c lgH         | 36657.12 | 93190.03 | 23625.42 | 46084.81 | 18336.42 | 110441   |
| A0A2U8J9 lg heavy c lgH         | 16047.45 | 15394.67 | 102117.3 | 0        | 120270.9 | 311230   |
| A0A2U8J9 lg heavy c lgH         | 0        | 80228.39 | 26800.2  | 0        | 36626.19 | 0        |
| A0A2U8J9 lg heavy c lgH         | 0        | 64184.02 | 100203.6 | 62135.2  | 117423.5 | 86642.52 |
| A0A2U8J9 lg heavy c lgH         | 0        | 160493.1 | 30250.76 | 34365.14 | 210933   | 0        |
| A0A2U8J9 lg heavy c lgH         | 11361.73 | 17859.73 | 26586.86 | 11472.54 | 43642.22 | 33396.36 |
| A0A2U8J9 lg heavy c lgH         | 25245.92 | 123600.8 | 16957.21 | 60258.22 | 27778.52 | 102402.1 |
| A0A2U8J9 lg heavy c lgH         | 63043.07 | 126950.4 | 99291.27 | 90964.97 | 71520.93 | 48248.07 |
| A0A2U8J9 lg heavy c lgH         | 245921   | 444800.5 | 791294.4 | 372651   | 433584.6 | 469611.8 |
| A0A2U8J9 lg heavy c lgH         | 0        | 59098.9  | 21901.25 | 0        | 0        | 27424.09 |
| A0A2U8J9 lg heavy c lgH         | 15447.99 | 10470.35 | 42544.35 | 7086.25  | 64433.74 | 0        |
| A0A2U8J9 lg heavy c lgH         | 132810.7 | 453400.3 | 256208.9 | 285966.4 | 214468   | 338381.4 |
| A0A2U8J9 lg heavy c lgH         | 17086.86 | 45725.01 | 12698.18 | 28160.8  | 58360.05 | 8673.208 |
| A0A2U8J9 lg heavy c lgH         | 69646.15 | 66243.88 | 123646.9 | 75835.25 | 49134.16 | 56481.54 |
| A0A2U8J9 lg heavy c lgH         | 105552.4 | 39522.09 | 32483.03 | 24829.16 | 27131.5  | 23089.71 |
| A0A2U8J9 lg heavy c lgH         | 21657.94 | 85917.76 | 27869.33 | 25346.52 | 34575.46 | 27731.45 |
| A0A2U8J9 lg heavy c lgH         | 105992.5 | 162483.7 | 100508.4 | 211380.5 | 142061   | 237097.3 |
| A0A2U8J9 lg heavy c lgH         | 337734   | 197503.8 | 215086.4 | 219420.7 | 229108.5 | 174138.2 |
| A0A2U8J9 lg heavy c lgH         | 4418.421 | 38526.16 | 7276.417 | 0        | 13305.91 | 10944.89 |
| A0A2U8J9 lg heavy c lgH         | 66051.97 | 498644.2 | 343752   | 216851   | 355908.4 | 278130.5 |
| A0A2X0SF DOCK2 (Fr DOCK2        | 192080.2 | 239028.7 | 162017.3 | 125662.4 | 0        | 139053.8 |
| A0A2X0U2 ARHGAP4 ARHGAP4        | 19958.33 | 8566.229 | 20449.84 | 0        | 31670.61 | 10151.01 |
| A0A2Y9CY lg heavy c lgH         | 252573.1 | 448959.9 | 217173.5 | 304486.7 | 278998.9 | 386726.7 |
| A0A2Y9CY lg heavy c lgH         | 278646.3 | 2316512  | 1588715  | 4312870  | 1720742  | 338526.1 |
| A0A2Y9CY lg heavy c lgH         | 512881.6 | 735911.6 | 634689.2 | 503336.7 | 424133.9 | 408643.7 |
| A0A2Y9CY lg heavy c lgH         | 68805.41 | 74984.98 | 52766.1  | 29287.28 | 47081.49 | 23773.88 |
| A0A2Y9CY lg heavy c lgH         | 36422.5  | 58575.59 | 187117.5 | 119699.5 | 76783    | 30408.52 |
| A0A2Y9CY lg heavy c lgH         | 700144.3 | 1169522  | 755435.6 | 899165.3 | 1107842  | 642590.3 |
| A0A2Y9CY lg heavy c lgH         | 9379.969 | 65198.5  | 46889.86 | 161080.2 | 83334.36 | 26274.75 |
| A0A2Y9CY lg heavy c lgH         | 213503.3 | 467679.9 | 299216.3 | 410777.9 | 278659.4 | 317981.2 |
| A0A2Y9CY lg heavy c lgH         | 172881   | 234304.6 | 311119   | 246339.7 | 138079.8 | 194824.8 |
| A0A2Z4LC Corticosteroid-bindin  | 1306810  | 1249808  | 1283918  | 1162150  | 1148007  | 940813.4 |
| A0A346JF Fc gamma FCGR2A        | 0        | 7458.678 | 0        | 0        | 6902.973 | 0        |
| A0A384MI Epididymis secretory : | 9976.826 | 10063.97 | 43890.77 | 39260.54 | 10250.38 | 2105.453 |
| A0A384MI Epididymis secretory : | 0        | 0        | 0        | 0        | 0        | 125194.4 |
| A0A384MI Epididymis secretory : | 1313017  | 2376660  | 2340354  | 2472107  | 2562555  | 3270369  |

|           |                        |          |          |          |          |          |          |
|-----------|------------------------|----------|----------|----------|----------|----------|----------|
| A0A384Mf  | Epididymis secretory   | 14605.1  | 21427.9  | 19681.39 | 9099.024 | 16778.89 | 8457.044 |
| A0A384Mf  | Epididymis secretory   | 3658798  | 3439308  | 4042391  | 5492506  | 8706884  | 3768721  |
| A0A384Mf  | Epididymis secretory   | 8985.967 | 27406.45 | 11307.5  | 33547.96 | 27680.76 | 16771.4  |
| A0A384Mf  | Epididymis secretory   | 46813.38 | 0        | 37344.54 | 0        | 0        | 37700.58 |
| A0A384Mf  | Transgelin             | 27161.15 | 9677.372 | 3278.594 | 18903.48 | 26862.17 | 0        |
| A0A384N6  | Epididymis secretory   | 935676.3 | 1177487  | 1070971  | 947747.1 | 1178823  | 697606.4 |
| A0A384Nk  | Apolipoprotein APOH    | 8734703  | 8318722  | 10175038 | 6907583  | 7549953  | 6618451  |
| A0A384Nk  | Clusterin              | 8747857  | 7116751  | 7742186  | 5279620  | 5748262  | 7434819  |
| A0A384Nk  | Epididymis secretory   | 14003.57 | 4648.163 | 4961.014 | 12209.07 | 21054.71 | 0        |
| A0A384Nf  | Epididymis secretory   | 7947.272 | 22237.97 | 15038.3  | 11679.34 | 14772.95 | 8250.385 |
| A0A384Ny  | Tubulin beta chain (Fr | 21635.83 | 0        | 0        | 23316.38 | 12302.39 | 12173.61 |
| A0A384P5  | Catalase               | 6537.462 | 0        | 7513.708 | 4935.012 | 5760.415 | 0        |
| A0A386NE  | Bone marr BST1         | 0        | 21254.03 | 0        | 0        | 12673.28 | 6887.003 |
| A0A3B0J0f | Adiponect ADID         | 54851.17 | 159875.2 | 104639.4 | 98195.13 | 34482.64 | 92953    |
| A0A3B3IQ  | Complement CFHR2       | 264298.9 | 360485.1 | 204582.2 | 248203.7 | 340608.9 | 71045.01 |
| A0A3B3ISf | Complement C1R         | 2330631  | 1646662  | 2060448  | 1440548  | 1341870  | 1186636  |
| A0AVP6    | UTS2 protein UTS2      | 33666.2  | 22035.66 | 0        | 26419.2  | 0        | 33111.7  |
| A0M8Q6    | Immunoglobulin IGLC7   | 182218.8 | 230177.2 | 175242.5 | 168110.9 | 246868.2 | 230429.7 |
| A0N071    | Delta glob HBD         | 51985.62 | 22231.93 | 56288.93 | 18588.65 | 50046.68 | 37106.43 |
| A0N2N3    | Burkitts lymphoma tra  | 577660.3 | 475629.3 | 362172.3 | 388426.1 | 261314.1 | 516859   |
| A0N5G3    | Rheumatoid V-lambda    | 148786.3 | 377771.2 | 209143.1 | 492356.1 | 269443.5 | 160277.5 |
| A0N5G4    | Rheumatoid VH4         | 210306.5 | 436752.9 | 451097.3 | 397398.5 | 272253.5 | 266211.5 |
| A0N5G7    | Rheumatoid VH3         | 407508.3 | 247419.1 | 143662.1 | 170351.3 | 113638   | 171213.7 |
| A0N5T0    | V-gamma V-gamma        | 93483.38 | 183048.5 | 129820.3 | 137588.5 | 122284.2 | 106278.5 |
| A0N7I9    | F5-20 (Fragment) F5-20 | 23954.01 | 8992.589 | 33134.34 | 0        | 25199.28 | 0        |
| A0N8J8    | V lambda (Fragment)    | 67011.85 | 170909.7 | 99997.98 | 103953.2 | 423565.1 | 162281.5 |
| A0N8V1    | Alpha heavy chain (Fr  | 3002.032 | 0        | 8304.289 | 0        | 6405.345 | 14162.7  |
| A0PJ79    | MRPL1 protein MRPL1    | 621812.7 | 428456.3 | 591622   | 439813.3 | 488985.4 | 714590.2 |
| A0PJA6    | TF protein TF          | 41674.59 | 80124.8  | 81829.33 | 93954.93 | 83007.07 | 93962.59 |
| A2IPH7    | HRV Fab 025-VH (Fra    | 273110.2 | 163543.2 | 139010.1 | 167047   | 312297.9 | 81604.02 |
| A2IPI2    | HRV Fab N27-VL (Fra    | 0        | 86700.44 | 144554   | 28176.61 | 0        | 14766.55 |
| A2IPI4    | HRV Fab 025-VL (Fra    | 0        | 44877.32 | 0        | 71840.88 | 0        | 29644.45 |
| A2IPI6    | HRV Fab 027-VL (Fra    | 348057.1 | 298697.5 | 504470.3 | 471679.3 | 468017.8 | 232906.6 |
| A2J1M3    | Rheumatoid factor RF   | 79620.95 | 27541.4  | 42926.63 | 39901.35 | 55452.71 | 125867   |
| A2J1M5    | Rheumatoid factor RF   | 76701.34 | 183715.5 | 125283   | 114562.2 | 154641.4 | 0        |
| A2J1M7    | Rheumatoid factor RF   | 114665.8 | 216720.7 | 179860.8 | 171413.3 | 15422.13 | 14750.93 |
| A2J1M8    | Rheumatoid factor RF   | 750824.9 | 1840561  | 2050506  | 1402421  | 927938.4 | 691385.9 |
| A2J1N0    | Rheumatoid factor RF   | 13279.46 | 23368.04 | 43680.32 | 27763.64 | 62648.25 | 32287.12 |
| A2J1N1    | Rheumatoid factor RF   | 0        | 31772.27 | 16695.64 | 103726.1 | 995146.4 | 0        |
| A2J1N4    | Rheumatoid factor RF   | 321831.6 | 186874.1 | 243632   | 145601.5 | 231864.9 | 122362.6 |
| A2J1N6    | Rheumatoid factor RF   | 119672.2 | 301185.5 | 191133.1 | 230406.7 | 117677.2 | 248801.1 |
| A2J1N7    | Rheumatoid factor RF   | 2453911  | 2175915  | 1011420  | 1846436  | 1220596  | 4108569  |
| A2J1N9    | Rheumatoid factor RF   | 220819.7 | 146416   | 119073.8 | 169795.9 | 203877.2 | 147775.3 |
| A2J1P0    | Rheumatoid factor RF   | 89805.42 | 74273.77 | 105522.1 | 163784.6 | 106489.6 | 91108.8  |
| A2J422    | Anti-HER3 scFv (Frag   | 118155.4 | 31700.41 | 108034.7 | 93912.1  | 101665.3 | 272799.4 |
| A2J423    | Anti-Mpl scFv (Fragm   | 0        | 34607.04 | 25572.22 | 54012.58 | 69604.59 | 46978.87 |
| A2JA16    | Anti-mucin1 light cha  | 1134563  | 1714963  | 1395643  | 1315262  | 1356936  | 1905037  |
| A2JA17    | Anti-mucin1 heavy ch   | 308792.3 | 578334.9 | 262563.5 | 525813.8 | 573312.9 | 109088.3 |
| A2JA19    | Anti-mucin1 light cha  | 312373.3 | 1937838  | 436711.1 | 135482.8 | 296885.2 | 1160933  |
| A2KBC1    | Anti-(ED-B) scFV (Fra  | 0        | 0        | 0        | 0        | 0        | 0        |
| A2KBC4    | Anti-TN-C scFv (Frag   | 11786949 | 17946046 | 13173691 | 11927511 | 14363424 | 20075244 |
| A2MYE1    | A30 (Fragment)         | 5742061  | 6355423  | 5726469  | 4798551  | 5016715  | 5833372  |
| A2N011    | Vh1-D-J3-region (Fra   | 16498.13 | 11082.94 | 57549.75 | 58538.85 | 36187.69 | 39072.38 |
| A2N0S7    | VH6DJ pro VH6DJ        | 0        | 21680.45 | 19249.1  | 0        | 0        | 23204.91 |
| A2N0S9    | VH6DJ pro VH6DJ        | 0        | 38036.77 | 21372.7  | 0        | 0        | 21854.92 |
| A2N0T6    | VH6DJ pro VH6DJ        | 0        | 0        | 0        | 0        | 92370.48 | 321743.8 |
| A2N0U4    | VH6DJ pro VH6DJ        | 0        | 73366.73 | 22494.68 | 0        | 9220.687 | 53756.52 |
| A2N0U5    | VH6DJ pro VH6DJ        | 0        | 69515.21 | 22405.57 | 0        | 0        | 0        |

|        |                         |          |          |          |          |          |          |
|--------|-------------------------|----------|----------|----------|----------|----------|----------|
| A2N2F4 | VK3 protei VK3          | 267233   | 466076.1 | 609084.2 | 430876.1 | 284334.8 | 242979.5 |
| A2N7P4 | Immunogl IGHM           | 99472.23 | 122607.4 | 193470.1 | 112191.8 | 251506.5 | 224356   |
| A2NB43 | Cold aggl IGH@          | 35782.43 | 26137.37 | 59196.72 | 23638.71 | 27912.21 | 27240.83 |
| A2NB44 | Cold aggl IGH@          | 144255.7 | 230409   | 474400.9 | 144951.2 | 120217.4 | 101504.5 |
| A2NB45 | Cold agglutinin FS-1    | 114109.5 | 770848.3 | 132824.6 | 431479.9 | 870207.7 | 581600   |
| A2NB46 | Cold agglutinin FS-2    | 0        | 21464.28 | 14212.51 | 3904.222 | 22162.26 | 3873.826 |
| A2NI60 | BRE (Fragment)          | 0        | 0        | 65085.91 | 31449.04 | 105573.2 | 40631.85 |
| A2NKM6 | NANUC-1 heavy chai      | 29322.11 | 81380.49 | 29983.52 | 26010.47 | 193579.8 | 51098.63 |
| A2NKM7 | NANUC-2 heavy chai      | 443899.9 | 785028.6 | 312764.6 | 421679.8 | 808991.2 | 1095527  |
| A2NUT2 | Lambda-chain (AA -2     | 46361168 | 61748884 | 48729028 | 51751568 | 45232852 | 65631636 |
| A2NW98 | Rheumatoid factor lig   | 568946.6 | 514953.5 | 458407.9 | 319423   | 396166.6 | 398267.6 |
| A2NWW3 | VH-3 fami VH-3          | 60493.48 | 163617.8 | 69627.91 | 43189.37 | 49613.13 | 79162.41 |
| A2NXP8 | Heavy chain variable    | 389582.4 | 649576.8 | 213300.4 | 478712   | 666935.1 | 497855.8 |
| A2NXP9 | K light chain variable  | 0        | 16215.68 | 0        | 29953.62 | 0        | 0        |
| A2NYQ7 | Anti-folate HuC4lamb    | 0        | 147275.8 | 124359.7 | 98823.98 | 130097.8 | 453972.8 |
| A2NYQ9 | Anti-folate HuVH8B      | 1784696  | 3696068  | 5753351  | 546214.6 | 5043460  | 2064221  |
| A2NYU7 | Heavy chain Fab (Fraç   | 86730.13 | 92310.84 | 180184   | 161527.2 | 103081.1 | 82982.77 |
| A2NYU8 | Heavy chain Fab (Fraç   | 30403.18 | 184655.9 | 151215.1 | 104781.4 | 116217.1 | 33095.21 |
| A2NYU9 | Heavy chain Fab (Fraç   | 0        | 109988.4 | 85652.09 | 59611.43 | 63135.65 | 69617.67 |
| A2NYV1 | Heavy chain Fab (Fraç   | 218470.1 | 813437.2 | 686894.1 | 161253.1 | 1153090  | 1273759  |
| A2NYV4 | Light chain Fab (Fragr  | 203753.9 | 228560.8 | 367508.8 | 152982.6 | 192464.7 | 281016.7 |
| A2NZ55 | Variable immnoglobu     | 2035201  | 373287.9 | 3822675  | 1968819  | 3783422  | 307695.1 |
| A2RTY6 | Inter-alpha:ITIH2       | 8213574  | 7212006  | 7199798  | 4513231  | 6330485  | 7461117  |
| A2VDG3 | CSF1R pro CSF1R         | 0        | 0        | 98242.38 | 0        | 89154.88 | 0        |
| A2VDJ4 | GNPTG pr GNPTG          | 0        | 0        | 0        | 33456.89 | 0        | 27603.75 |
| A3KPE2 | Apolipoppr APOC3        | 15487313 | 14764396 | 22500340 | 12330734 | 18568462 | 15012714 |
| A4F255 | Immunobl VHCH1          | 90984.41 | 265863.9 | 172060.6 | 124115.3 | 190533.5 | 292009.4 |
| A4FUA5 | ANTXR2 pr ANTXR2        | 0        | 4382.674 | 0        | 3765.358 | 3801.976 | 3360.564 |
| A4UCS6 | Peroxiredoxin 6 (Frag   | 15316.43 | 0        | 6903.641 | 5414.808 | 0        | 0        |
| A4UCT1 | Glyceraldehyde 3-ph     | 157105.8 | 280238.3 | 187261.3 | 33212.99 | 201577.5 | 0        |
| A5PKX5 | Alpha-man MAN2A1        | 20329.29 | 15358.97 | 18344.39 | 12401.95 | 11829.68 | 16865.43 |
| A5PL27 | CP protein CP           | 10160034 | 10404583 | 9316269  | 9269865  | 8603186  | 8402741  |
| A5YAK2 | Apolipoppr APOC4        | 223962.3 | 136756.1 | 272694   | 234381.3 | 211741.2 | 101236.9 |
| A6XGL1 | Transthyretin           | 3810266  | 2066450  | 2181729  | 2589295  | 2626563  | 3416538  |
| A6XND0 | Insulin-like IGFBP3     | 158855.1 | 80803.8  | 132092.2 | 109032.7 | 127690.2 | 117005.2 |
| A6XNE2 | Complement factor D     | 230863.7 | 318756.2 | 153537   | 140780.6 | 221512.3 | 158383.4 |
| A8K061 | cDNA FLJ77880, highl    | 334896.2 | 321431.5 | 284799.7 | 333618.8 | 45754.21 | 397602.3 |
| A8K0R3 | Osteoglyci OGN          | 0        | 11210.06 | 13108.17 | 8573.847 | 11539.23 | 0        |
| A8K104 | cDNA FLJ78726, highl    | 0        | 34336.22 | 31128.85 | 35975.71 | 29149.48 | 35913.43 |
| A8K1K1 | cDNA FLJ76342, highl    | 102490.7 | 106162.2 | 190547   | 107015.8 | 111010.2 | 103792.2 |
| A8K2T4 | cDNA FLJ78207, highl    | 665899.6 | 941947   | 980767.4 | 1098742  | 1129393  | 878661.1 |
| A8K2U0 | Alpha-2-n A2ML1         | 1043511  | 1825170  | 641701.9 | 1357036  | 826971.7 | 2404214  |
| A8K335 | Folate gamma-glutar     | 44467.29 | 40557.44 | 46391.57 | 29513.08 | 16087.79 | 11149.35 |
| A8K3I0 | cDNA FLJ78437, highl    | 8539.188 | 9532.105 | 19868.51 | 4990.972 | 23729.61 | 14581.45 |
| A8K486 | Peptidyl-prolyl cis-tra | 31753.77 | 12539.63 | 0        | 25680    | 16796.89 | 16248.36 |
| A8K5T0 | cDNA FLJ75416, highl    | 2022068  | 0        | 1765825  | 796684.1 | 927982.6 | 877394.6 |
| A8K6C9 | cDNA FLJ78037, highl    | 383170.7 | 265859.1 | 350752.4 | 313797.8 | 388110.9 | 221215.2 |
| A8K6K4 | cDNA FLJ77565, highl    | 73538.4  | 57597.23 | 42564.26 | 62307.67 | 74722.16 | 60344.24 |
| A8K7G6 | cDNA FLJ75763, highl    | 27476.87 | 44661.38 | 27977.32 | 0        | 14977.29 | 7488.688 |
| A8K872 | cDNA FLJ77849, highl    | 2568663  | 4391475  | 3128468  | 3715056  | 1377439  | 3917795  |
| A8K9C4 | Elongation factor 1-a   | 0        | 0        | 0        | 0        | 26678.22 | 8580.091 |
| A8K9P0 | cDNA FLJ78413, highl    | 15480.16 | 37595.83 | 12262.1  | 27659.6  | 16046.08 | 0        |
| A8K9U6 | cDNA FLJ76121, highl    | 14557.78 | 0        | 0        | 0        | 0        | 0        |
| A8K9V7 | Neuropilin              | 5457.411 | 39455.57 | 16809.71 | 7499.775 | 16796.98 | 26964.21 |
| B0AZL7 | cDNA, FLJ79457, high    | 851002.2 | 448401.4 | 986994.6 | 873338.5 | 891075.8 | 918525.9 |
| B0YIZ6 | Cubilin var CUBN        | 89501.63 | 98511.59 | 186766.6 | 190382.8 | 189713.1 | 49644.97 |
| B0YJC6 | Vitamin K- PROZ         | 66013.39 | 65972.95 | 77294.1  | 102730.2 | 33445.69 | 76293.36 |
| B0ZBE2 | Angiotensi AGT          | 4792785  | 3515561  | 4398605  | 4250149  | 4113776  | 4191679  |

|        |                       |          |          |          |          |          |          |
|--------|-----------------------|----------|----------|----------|----------|----------|----------|
| B1AHL2 | Fibulin-1 FBLN1       | 0        | 0        | 0        | 24650.88 | 40218.57 | 14394.07 |
| B1N7B6 | Cryocryoglobulin C    | 1906470  | 4504333  | 3323939  | 4134899  | 3258151  | 2834798  |
| B1N7B7 | Cryocryoglobulin C    | 0        | 485537.9 | 511472.5 | 323014.6 | 0        | 0        |
| B1N7B8 | Cryocryoglobulin C    | 83255.01 | 0        | 0        | 56042.63 | 34449.3  | 183113.5 |
| B1N7B9 | Cryocryoglobulin C    | 808232.1 | 655950.1 | 542070.6 | 1052557  | 260998   | 520661.6 |
| B2CIS9 | Caspase 14 CASP14     | 0        | 24402.57 | 843.7906 | 0        | 0        | 301956.7 |
| B2MUD5 | Neutrophil ELA2       | 0        | 0        | 49497.73 | 81775.95 | 84933.04 | 0        |
| B2R4C5 | Lysozyme LYZ          | 38523.89 | 97474.31 | 52196.59 | 43179.35 | 33828.02 | 56198.66 |
| B2R4M6 | Protein S100          | 331990.3 | 125027.5 | 60947.46 | 476845.2 | 397471.2 | 136508.9 |
| B2R4R0 | Histone H4 HIST1H4L   | 0        | 21803.66 | 13172.48 | 31066.74 | 32443.81 | 72142.87 |
| B2R5G8 | Serum amyloid A pro   | 3522492  | 3203097  | 3408494  | 3466501  | 2748058  | 3556651  |
| B2R5H0 | Protein S100          | 0        | 7564.375 | 0        | 0        | 21998.95 | 0        |
| B2R672 | Extracellular XLKD1   | 64309.82 | 53811.55 | 70244.9  | 38408.02 | 78177.02 | 48554.93 |
| B2R701 | cDNA, FLJ93202, Hom   | 29077.98 | 19165.75 | 29643.82 | 21180.15 | 42329.83 | 13556.44 |
| B2R7D2 | cDNA, FLJ93389, high  | 19539.15 | 11810.98 | 40276.89 | 15891.92 | 20158.08 | 23812.81 |
| B2R7I0 | cDNA, FLJ93451, high  | 40922.64 | 87919.32 | 75363.22 | 33135.67 | 59903.77 | 111974.8 |
| B2R7Z6 | cDNA, FLJ93674        | 0        | 1445782  | 419324.2 | 536900.1 | 7824.112 | 6587.461 |
| B2R825 | Alpha-1,4 glucan phc  | 6078.614 | 0        | 0        | 0        | 0        | 4269.936 |
| B2R829 | cDNA, FLJ93711, high  | 130141.1 | 346060.7 | 315128.8 | 318801.6 | 433558.4 | 191480   |
| B2R888 | Monocyte differentiat | 515605.6 | 426889.6 | 432829.2 | 326922   | 403091.5 | 363450.5 |
| B2R892 | cDNA, FLJ93793, high  | 26105.78 | 970.1274 | 0        | 0        | 0        | 32691.67 |
| B2R950 | cDNA, FLJ94213, high  | 487493.3 | 75435.63 | 390951.7 | 174249.3 | 126355.6 | 95986.04 |
| B2R960 | cDNA, FLJ94230, high  | 2429471  | 1892428  | 2326901  | 2024531  | 2427900  | 1841098  |
| B2R983 | cDNA, FLJ94267, high  | 25312.96 | 18476.09 | 17006.9  | 15909.22 | 20396.71 | 6113.818 |
| B2RA39 | cDNA, FLJ94686, high  | 98498.01 | 32689.98 | 87797.26 | 32300.9  | 56873.55 | 58021.38 |
| B2RAL6 | cDNA, FLJ94991, high  | 924272.7 | 574806.6 | 805329.7 | 622693   | 266811   | 26117.32 |
| B2RBF5 | cDNA, FLJ95483, high  | 17669.44 | 25153.13 | 18133.44 | 24582.98 | 22550.75 | 14170.81 |
| B2RBS8 | cDNA, FLJ95666, high  | 103149.6 | 306343.2 | 196653.8 | 267883.4 | 263425.7 | 219891   |
| B2RBW9 | cDNA, FLJ95746, high  | 55095.94 | 48334.64 | 57423.84 | 48680.42 | 39365.38 | 37458.1  |
| B2RBZ5 | cDNA, FLJ95778, high  | 19242.34 | 21227.4  | 572098.6 | 1131116  | 9414.586 | 17666.63 |
| B2RDY9 | Adenylyl cyclase-assc | 40457.04 | 0        | 0        | 29268.73 | 28755.32 | 8552.959 |
| B2RMS9 | Inter-alpha1(I)IH4    | 16474255 | 11257079 | 13438607 | 10577766 | 10483786 | 16270243 |
| B2ZDQ1 | Neutrophil NGAL       | 43311.02 | 22730.77 | 30127.64 | 24822.42 | 31916.93 | 0        |
| B3KQF4 | cDNA FLJ90373 fis, cl | 73779.25 | 58098.42 | 51132.63 | 0        | 44084.59 | 28820.14 |
| B3KRN2 | cDNA FLJ34617 fis, cl | 0        | 0        | 0        | 0        | 0        | 17757.9  |
| B3KTV0 | cDNA FLJ38781 fis, cl | 13309.55 | 4648.121 | 4961.009 | 9421.625 | 13364.53 | 7740.561 |
| B3KUE5 | Phospholipase PLTP    | 191365   | 296060.1 | 202258.4 | 214819.2 | 241757.3 | 265283.2 |
| B3KWB5 | cDNA FLJ42722 fis, cl | 15709.86 | 0        | 22245.13 | 23787.74 | 16492.71 | 14203.72 |
| B4DEW5 | cDNA FLJ54049, highl  | 29432.7  | 28376.59 | 23515.79 | 23789.16 | 28063.05 | 29460.39 |
| B4DG70 | cDNA FLJ52624, highl  | 13614696 | 23268820 | 8003959  | 10780209 | 11489880 | 22909938 |
| B4DI57 | cDNA FLJ54111, highl  | 144957.7 | 319116.8 | 211800.6 | 209219.1 | 298046.8 | 141568.3 |
| B4DJ12 | cDNA FLJ53342, highl  | 21853.07 | 12276.19 | 13671.12 | 9554.192 | 18673.64 | 10134.63 |
| B4DLB8 | cDNA FLJ52205, highl  | 22309.67 | 18132.21 | 22668.54 | 17215.68 | 16067.85 | 16844.12 |
| B4DPM2 | cDNA FLJ55738, highl  | 50828.76 | 45237.19 | 62347.8  | 46657.84 | 66464.49 | 40199.25 |
| B4DPR2 | cDNA FLJ50830, highl  | 1032839  | 20801406 | 16424870 | 2737931  | 21467640 | 29277202 |
| B4DQ61 | cDNA FLJ56795, highl  | 0        | 264636.8 | 82301.51 | 0        | 264269.9 | 68551.76 |
| B4DQK4 | Tubulin alpha chain   | 17824.83 | 6489.662 | 3284.158 | 14977.18 | 14733.05 | 11144.72 |
| B4DR57 | cDNA FLJ60818, highl  | 111811.3 | 66128.94 | 96221.52 | 89299.46 | 58844.15 | 354882.8 |
| B4DSX2 | cDNA FLJ60144, highl  | 33819.38 | 41960.07 | 41700.2  | 27819.46 | 25190.37 | 22494.54 |
| B4DUH8 | cDNA FLJ60163, highl  | 0        | 0        | 20809.59 | 0        | 15199.79 | 0        |
| B4DUI5 | Triosephosphate isom  | 2409469  | 0        | 0        | 3331810  | 8267.583 | 0        |
| B4DUV1 | Fibulin-1             | 764403.1 | 788816.1 | 872446.6 | 743047.4 | 1328531  | 615906.4 |
| B4DWE9 | cDNA FLJ57216, highl  | 566516.8 | 268170.6 | 307971.6 | 388207.1 | 415402.2 | 351128.4 |
| B4E0X1 | Beta-2-microglobulin  | 124518.9 | 241691.8 | 134511.7 | 89379.13 | 163995   | 169759   |
| B4E1B2 | cDNA FLJ53691, highl  | 8117788  | 4803049  | 4524891  | 4727793  | 5047549  | 6847981  |
| B4E1C2 | Kininogen KNG1        | 16914238 | 13971466 | 17075482 | 12867036 | 14638887 | 15646824 |
| B4E1D8 | cDNA FLJ51597, highl  | 340531.8 | 158832   | 476698.8 | 456984.2 | 1348639  | 178021.9 |
| B4E1E1 | cDNA FLJ51598, highl  | 1734200  | 1082891  | 1258919  | 1039782  | 1095178  | 1661038  |

|        |                                         |          |          |          |          |          |          |
|--------|-----------------------------------------|----------|----------|----------|----------|----------|----------|
| B4E1Z4 | cDNA FLJ55673, high                     | 13803479 | 8521621  | 11382410 | 7719557  | 7639017  | 8333810  |
| B4E2S7 | cDNA FLJ58780, high                     | 67982.98 | 79386.23 | 54307.55 | 62883.27 | 65785.66 | 61502.63 |
| B4E367 | cDNA FLJ61564, high                     | 36502.87 | 42993.12 | 44584.94 | 31496.98 | 51677.02 | 25278.69 |
| B4E3S6 | cDNA FLJ58413, high                     | 26961.66 | 14561.61 | 11787.32 | 24041.44 | 14917.3  | 21643.54 |
| B6EDE2 | Epididymis HEL180                       | 2476361  | 537970.2 | 439953.2 | 2405429  | 3229611  | 169122.9 |
| B7Z1F8 | cDNA FLJ53025, high                     | 3177534  | 1457743  | 2000883  | 3831824  | 1989866  | 3712027  |
| B7Z539 | cDNA FLJ56954, high                     | 104162.3 | 0        | 0        | 99661.14 | 295883.3 | 228190.3 |
| B7Z550 | Compleme C8B                            | 1197841  | 808603.3 | 1108734  | 759899.6 | 634442.5 | 1343121  |
| B7Z6V5 | cDNA FLJ50240, high                     | 0        | 0        | 96676.26 | 0        | 84710.53 | 7735.737 |
| B7Z6Z4 | cDNA FLJ5MYL6                           | 11246.78 | 0        | 0        | 7918.973 | 32171.18 | 0        |
| B7Z7M2 | cDNA FLJ51564, high                     | 149507.9 | 0        | 279152   | 0        | 0        | 39509.29 |
| B7Z832 | cDNA FLJ51409, high                     | 11611.88 | 13244.13 | 10531.9  | 12025.09 | 0        | 6702.577 |
| B7Z8Q2 | cDNA FLJ55606, high                     | 12599979 | 9366380  | 10932224 | 10298349 | 9979664  | 20014658 |
| B7Z8Q7 | cDNA FLJ53871, high                     | 0        | 6763.622 | 118886.9 | 0        | 0        | 0        |
| B7Z9B1 | cDNA FLJ52398, high                     | 27603.79 | 35344.21 | 4193.691 | 6015.122 | 24753.42 | 56352.91 |
| B7ZAS5 | cDNA, FLJ79289, high                    | 14840.42 | 0        | 0        | 16518.19 | 0        | 12439.67 |
| B7ZKQ8 | Podocalyxin PODXL                       | 13326.1  | 15245.17 | 0        | 0        | 18675.93 | 11267.65 |
| B7ZKY6 | Membrane MME                            | 645974.2 | 2459406  | 3891546  | 4458122  | 5789594  | 891070.6 |
| B7ZMD7 | Alpha-amylase AMY1A                     | 0        | 0        | 0        | 2861.994 | 3099.198 | 28499.44 |
| B7ZMJ3 | ADAMTSL2 ADAMTSL2                       | 5677.223 | 7429.736 | 13265.94 | 4304.381 | 7059.849 | 11482.64 |
| B7ZW00 | COL6A3 protein COL6A3                   | 17605.81 | 18965.7  | 15007.26 | 10427.54 | 13118.24 | 10070.7  |
| B9EJA8 | Mannose receptor MRC1L1                 | 61896.26 | 10990.18 | 14425.19 | 9186.174 | 0        | 0        |
| C0JYY2 | Apolipoprotein APOB                     | 8797236  | 7317577  | 6244021  | 8732367  | 9729928  | 7641765  |
| C9J7T9 | Troponin C TNNC2                        | 17932.25 | 11433.57 | 12115.58 | 11040.73 | 11374.65 | 14517.34 |
| C9JB55 | Serotransferrin TF                      | 4826882  | 5201522  | 6151113  | 5996042  | 103275.4 | 111372.6 |
| C9JF17 | Apolipoprotein APOD                     | 907265.9 | 1173801  | 1032471  | 1120725  | 975035.5 | 1496166  |
| C9JFR7 | Cytochrome CYCS                         | 4060.814 | 3997.629 | 0        | 2482.099 | 3883.655 | 0        |
| C9JHR8 | Scavenger CD163                         | 5770.427 | 22777.12 | 17251.45 | 3439.878 | 26161.02 | 4171.011 |
| C9JKV3 | Tissue factor TFPI                      | 7577.741 | 7844.899 | 6499.182 | 5049.49  | 8556.315 | 8288.527 |
| C9JPQ9 | Fibrinogen FGG                          | 1164100  | 463791.3 | 669645.2 | 509302.5 | 739259.1 | 834938   |
| D0PNI1 | Epididymis YWHAZ                        | 17480.27 | 10178    | 8615.365 | 13329.53 | 24344.56 | 10195.66 |
| D2JYH4 | Actin, alpha ACTA2                      | 74346.42 | 70298.66 | 44381.99 | 71698.46 | 71886.82 | 34986.17 |
| D3DNN4 | Carboxylic esterase BCHE                | 224128.7 | 346869.4 | 322634.3 | 250403.2 | 271264.4 | 205932.9 |
| D3DQH8 | Secreted phospholipase SPARC            | 9736.474 | 3246.045 | 22338.66 | 0        | 0        | 7601.18  |
| D3DQX7 | Serum amyloid A SAA1                    | 54875.44 | 19297.18 | 508851.8 | 4406889  | 1225219  | 2519011  |
| D3DRP5 | Chromosome 9orf19                       | 13556.86 | 13871.01 | 7097.943 | 0        | 9317.497 | 10271.98 |
| D3DSM4 | Collagen, type I COL1A1                 | 14720.03 | 16408.95 | 66967.03 | 55259.91 | 15793.48 | 67309.73 |
| D3DU30 | Intercellular adhesion molecule ICAM2   | 32239.91 | 28612.46 | 21018.12 | 14851.7  | 14001.62 | 29851.3  |
| D3JV41 | C-X-C motif chemokine 5                 | 538650   | 212757.6 | 236555.5 | 349845.3 | 426292.7 | 401026.3 |
| D6CHE9 | Proteinase PRTN3                        | 10601.93 | 9596.118 | 25837.24 | 25435.33 | 28369.76 | 29134.63 |
| D6RE86 | Ceruloplasmin CP                        | 32506.71 | 33478.27 | 0        | 32375.46 | 29805.07 | 0        |
| D6RF35 | Vitamin D-binding protein GC            | 0        | 2662796  | 1163633  | 1416286  | 773804.6 | 1840459  |
| D6RF86 | Cadherin-1 CDH6                         | 0        | 378436.3 | 0        | 0        | 0        | 0        |
| D9YZU5 | Beta-globin HBB                         | 3987959  | 1663940  | 4413391  | 2164603  | 3023222  | 3419691  |
| D9ZGG2 | Vitronectin VTN                         | 21283280 | 14808977 | 20834146 | 15081135 | 15224487 | 11761539 |
| E1B4S8 | Apolipoprotein APOB                     | 201499.9 | 159422.8 | 134047.1 | 200634   | 223143.3 | 207743.7 |
| E7DVW5 | Fatty acid binding protein FABP5        | 246043.1 | 81590.68 | 194974.4 | 160823.2 | 32714.79 | 73324.28 |
| E7END6 | Vitamin K-dependent protein PROC        | 81207.85 | 53222.98 | 88359.97 | 71891.05 | 74840.18 | 67027.79 |
| E7ET86 | Cyclin-dependent kinase CDKL3           | 17892.43 | 4530.409 | 8995.602 | 9757.658 | 6788.588 | 10743.25 |
| E7ETH0 | Compleme CFI                            | 2502200  | 1875264  | 2166443  | 1805130  | 1543228  | 1411913  |
| E7EUF1 | Ectonucleoside triphosphate ENPP2       | 18345.82 | 19488.12 | 13137.94 | 15142.09 | 20433.79 | 19284.62 |
| E7EWH8 | Putative hyaluronan-binding protein HY1 | 252474.2 | 190329.4 | 333154.2 | 263299.3 | 196743.8 | 251465.4 |
| E9KL23 | Epididymis SERPINA1                     | 1.08E+08 | 82235624 | 82963200 | 47255620 | 69160760 | 1.08E+08 |
| E9KL26 | Epididymis SERPING1                     | 22728386 | 15197700 | 20224238 | 14885391 | 16598293 | 16744222 |
| E9PK25 | Cofilin-1 CFL1                          | 210472.4 | 468768.3 | 139861.5 | 55012.25 | 4950.139 | 506761.2 |
| F2RM37 | Coagulation factor F9                   | 529368.4 | 363058.2 | 518498.2 | 359967.3 | 345559.3 | 302410.6 |
| F6KPG5 | Albumin (Fragment)                      | 7406472  | 5708138  | 4825468  | 5479779  | 7148788  | 5546439  |
| G1FM90 | Anti-Influenza A hemagglutinin          | 3347982  | 4422754  | 5357378  | 2890563  | 5026250  | 2026237  |

|        |                              |          |          |          |          |          |          |
|--------|------------------------------|----------|----------|----------|----------|----------|----------|
| G1FM92 | Anti-Influenza A hem         | 191583.6 | 135735.6 | 456743.1 | 295671.1 | 305009.4 | 410632.3 |
| G3GAU4 | Anti-H1N1 influenza          | 6386288  | 21421712 | 17800732 | 7437197  | 17516824 | 19654004 |
| G3V0E5 | Transferrin TFRC             | 33533.51 | 37407.87 | 33914.15 | 31266.88 | 16809.17 | 26625.4  |
| G3V357 | Ribonucleaz RNASE1           | 24709.92 | 54948.8  | 38719.09 | 35761.59 | 58070.26 | 26890.27 |
| G3V3A0 | Alpha-1-a SERPINA3           | 0        | 0        | 0        | 0        | 0        | 29000.87 |
| G3XAK1 | Hepatocyte MST1              | 188100.4 | 172880.7 | 174284.3 | 164725.7 | 190796.1 | 105386   |
| G4V503 | Breast cancer BRCA1          | 57427.58 | 45658.68 | 48984.75 | 23992.96 | 120437.1 | 52063.11 |
| H0YAC1 | Plasma kallikrein KLKB1      | 1174307  | 866169.7 | 1193584  | 996666   | 1194351  | 764882.7 |
| H0YD37 | Platelet-derived PDGFD       | 47603.45 | 42234.14 | 52058.69 | 40387.68 | 19333.62 | 52018.39 |
| H0YJW9 | Uncharacterized protein      | 50505.17 | 30523.25 | 0        | 0        | 0        | 0        |
| H6VRF8 | Keratin 1 KRT1               | 430618   | 464361.9 | 2057929  | 841961.3 | 616754.5 | 364818.7 |
| I3L145 | Sex hormone SHBG             | 305714.6 | 529067.1 | 181924.6 | 235091.9 | 300695.5 | 619814.1 |
| J3KNP4 | Semaphorin SEMA4B            | 8136.234 | 0        | 7243.711 | 0        | 0        | 14952.28 |
| J3KPA1 | Cysteine-rich CRISP3         | 69309.48 | 39761.12 | 30767.07 | 44081.94 | 38918.05 | 19145.99 |
| J3KPS3 | Fructose-bisphosphate ALDOA  | 34414.18 | 22638.42 | 19620.08 | 19012.48 | 25875.36 | 30250.69 |
| J3KQ66 | Reelin RELN                  | 173387   | 143452   | 165762.2 | 211813.4 | 155821.9 | 178940.9 |
| J3QLL2 | Dipeptidase DPEP2            | 0        | 7080.41  | 3753.573 | 4425.196 | 7040.417 | 7769.033 |
| K7EQ86 | KIAA0100, KIAA0100           | 0        | 7887.432 | 0        | 0        | 0        | 0        |
| K7ER74 | APOC4-A/APOC4-A              | 4121845  | 4900548  | 6696969  | 3407447  | 4986158  | 3310209  |
| K9JA46 | Epididymis EL52              | 5295.792 | 68898.54 | 44758.76 | 3151.604 | 3823.226 | 0        |
| L0R8K6 | Alternative TRIM25           | 0        | 13234.23 | 11244.62 | 13226.98 | 10027.95 | 0        |
| L8E853 | von Willebrand VWF           | 91912.25 | 180291.3 | 49928.59 | 48641.51 | 126181.4 | 205675.9 |
| MOQYH4 | Synaptotagmin SYT3           | 468601.3 | 408371.8 | 300594.6 | 293357.1 | 779462.4 | 1472497  |
| M0R0Y2 | Alpha-solen NAPA             | 179663.4 | 16806.21 | 171918.6 | 112266.2 | 131687.2 | 106043.4 |
| M0R1Q1 | Complement C3                | 679008.9 | 866159.4 | 1128275  | 850020   | 950599.9 | 524901.3 |
| M0R3C9 | Neurogenin NOTCH3            | 0        | 3847.351 | 2921.412 | 0        | 0        | 3066.522 |
| O00187 | Mannan-binding MASP2         | 149898.8 | 83348.46 | 108151.6 | 78350.11 | 120212.1 | 104173.6 |
| O43157 | Plexin-B1 PLXNB1             | 0        | 32257.75 | 2654.227 | 77371.55 | 74885.56 | 35986.31 |
| O43286 | Beta-1,4-galactosyl B4GALT5  | 22309.47 | 18132.25 | 17278.18 | 17215.7  | 16067.8  | 16844.24 |
| O43493 | Trans-Golgi TGOLN2           | 5788.04  | 4233.978 | 3602.169 | 2503.165 | 3853.238 | 3822.623 |
| O43866 | CD5 antigen CD5L             | 1105001  | 1831046  | 1364573  | 697801.3 | 1131716  | 1882761  |
| O75460 | Serine/threonine ERN1        | 5371714  | 3501262  | 4268720  | 3395269  | 2839836  | 2925960  |
| O75636 | Ficolin-3 FCN3               | 615330.2 | 189624.8 | 464857.3 | 262852.1 | 306342.6 | 268539   |
| O75882 | Attractin ATRN               | 592171   | 540191.8 | 575109.6 | 355987.9 | 596994.4 | 385355.6 |
| O95445 | Apolipoprotein APOM          | 1570633  | 1403166  | 1155270  | 1701379  | 1483362  | 3276704  |
| O95479 | GDH/6PGL H6PD                | 2554.873 | 0        | 0        | 0        | 0        | 10646.87 |
| O95497 | Pantethein VNN1              | 0        | 0        | 0        | 0        | 3124.56  | 42739.42 |
| O95978 | VH1 protein VH1              | 17655.9  | 11322.55 | 21508.27 | 20019.57 | 36007.73 | 24233.99 |
| P00338 | L-lactate dehydrogenase LDHA | 39614.68 | 47690.46 | 35438.74 | 47460.48 | 34822.22 | 36448.96 |
| P00451 | Coagulation F8               | 23592.6  | 10108.68 | 0        | 1058.78  | 2914.176 | 21703.27 |
| P00488 | Coagulation F13A1            | 148401.9 | 82165.2  | 29329.94 | 70147.92 | 190260.4 | 102389.3 |
| P00558 | Phosphoglycerate PGK1        | 0        | 0        | 0        | 4311.347 | 46879.04 | 9255.569 |
| P00734 | Prothrombin F2               | 5835849  | 4204474  | 5518204  | 4848848  | 4172792  | 4246687  |
| P00738 | Haptoglobin HP               | 1.98E+08 | 1.21E+08 | 1.21E+08 | 91295392 | 81369928 | 2.26E+08 |
| P00739 | Haptoglobin HPR              | 19641782 | 21843256 | 18158428 | 12026672 | 11128495 | 35835624 |
| P00742 | Coagulation F10              | 329863.8 | 173430.4 | 285264   | 202604.4 | 187540.7 | 254993.7 |
| P00747 | Plasminogen PLG              | 6286134  | 5283685  | 5907745  | 5076838  | 5028445  | 5840369  |
| P00748 | Coagulation F12              | 921490.8 | 836851.4 | 932129.5 | 1063830  | 534274.2 | 691908.8 |
| P00915 | Carbonic anhydrase CA1       | 37025.79 | 18826.78 | 39390.37 | 22825.23 | 24801.96 | 41733.42 |
| P01023 | Alpha-2-macroglobulin A2M    | 25846040 | 43888996 | 16830152 | 24819768 | 26028510 | 33824104 |
| P01024 | Complement C3                | 54574288 | 38838356 | 44483480 | 36867064 | 32542170 | 50250812 |
| P01031 | Complement C5                | 1906681  | 1319243  | 1321214  | 1441734  | 1431488  | 1253015  |
| P01591 | Immunoglobulin JCHAIN        | 3592760  | 6264274  | 6197065  | 2356314  | 3396060  | 6215744  |
| P01601 | Immunoglobulin IGKV1D-1      | 385781.2 | 328553.6 | 372039.6 | 423389.4 | 385347.4 | 215858   |
| P01602 | Immunoglobulin IGKV1-5       | 661778.8 | 994018.6 | 1115733  | 841515.6 | 624246.1 | 145465.7 |
| P01704 | Immunoglobulin IGLV2-14      | 148535.3 | 332369.4 | 200398.1 | 134908   | 382937.4 | 215629.8 |
| P01706 | Immunoglobulin IGLV2-11      | 156928.5 | 121965.6 | 571471.6 | 116099.8 | 185118.8 | 308016.8 |
| P01766 | Immunoglobulin IGHV3-13      | 185766.9 | 129799.2 | 130624.4 | 254461.7 | 160580.5 | 150774.2 |



|        |                              |          |          |          |          |          |          |
|--------|------------------------------|----------|----------|----------|----------|----------|----------|
| P01817 | Immunoglobulin IGHV2-5       | 11459.39 | 0        | 48074.59 | 24187.77 | 29311.95 | 27241.09 |
| P01833 | Polymeric IPIGR              | 44447.88 | 58220.57 | 81433.7  | 69872.94 | 113670.1 | 28093.67 |
| P01871 | Immunoglobulin IGHM          | 21005726 | 29630658 | 26039798 | 12304212 | 22878548 | 62942528 |
| P02452 | Collagen alpha COL1A1        | 10699    | 11823.24 | 8290.588 | 7298.218 | 12672.81 | 0        |
| P02533 | Keratin, type KRT14          | 182232.3 | 250401.2 | 914357   | 467621.9 | 394023.5 | 455536.8 |
| P02652 | Apolipoprotein APOA2         | 3584805  | 19858040 | 20532498 | 19239010 | 2630884  | 2788169  |
| P02671 | Fibrinogen FGA               | 53328240 | 25163764 | 30707100 | 37763540 | 32947284 | 52430988 |
| P02675 | Fibrinogen FGB               | 1.19E+08 | 60902592 | 79923384 | 89692488 | 79450072 | 1.23E+08 |
| P02679 | Fibrinogen FGG               | 86895736 | 46404164 | 52598776 | 61147452 | 59545828 | 83086816 |
| P02741 | C-reactive CRP               | 5213936  | 2505893  | 3618509  | 4770053  | 1845593  | 1148859  |
| P02743 | Serum amyloid APCS           | 1060197  | 649874.3 | 671442.8 | 343153   | 632680.4 | 364255.2 |
| P02750 | Leucine-rich LRG1            | 9166065  | 4668906  | 6680726  | 5425588  | 3748864  | 6483225  |
| P02751 | Fibronectin FN1              | 6445693  | 3254024  | 3262958  | 4376822  | 6928965  | 8790229  |
| P02753 | Retinol-binding RBP4         | 3369326  | 4408466  | 3941623  | 2405347  | 3850586  | 4618352  |
| P02760 | Protein A MAMBP              | 4547762  | 4627216  | 7341431  | 3548463  | 4817394  | 3733816  |
| P02763 | Alpha-1-antitrypsin ORM1     | 80614512 | 56842332 | 66017984 | 58822468 | 40943560 | 89367640 |
| P02768 | Serum albumin ALB            | 1.28E+09 | 1.04E+09 | 9.4E+08  | 8.85E+08 | 7.2E+08  | 2.34E+09 |
| P02776 | Platelet factor PF4          | 117068.9 | 74766.73 | 78917.75 | 89287.97 | 147892.9 | 113202.6 |
| P02787 | Serotransferrin TF           | 72028648 | 79178960 | 81613936 | 68734880 | 72941328 | 1.59E+08 |
| P02790 | Hemopexin HPX                | 49771736 | 36922948 | 40769828 | 35377060 | 31948290 | 58484136 |
| P03950 | Angiogenin ANG               | 46332.43 | 53179.72 | 81202.84 | 53912.48 | 41952.07 | 41909.61 |
| P03951 | Coagulation F11              | 169808   | 119833.5 | 165158.5 | 128225.5 | 141629.8 | 162699.2 |
| P04003 | C4b-binding protein C4BPA    | 13918997 | 9415926  | 11518891 | 11616998 | 10563044 | 10850436 |
| P04196 | Histidine-rich HRG           | 4063974  | 1952326  | 3309234  | 2652491  | 2940605  | 4311471  |
| P04217 | Alpha-1B-glycoprotein A1BG   | 9317861  | 10487073 | 11475488 | 9368939  | 9632871  | 12744230 |
| P04275 | von Willebrand factor VWF    | 562551.9 | 557235.5 | 223378.1 | 573877.6 | 931334.3 | 881772.3 |
| P04430 | Immunoglobulin IGKV1-16      | 749333.9 | 570859.6 | 419091   | 960575.4 | 1098998  | 1131213  |
| P05160 | Coagulation F13B             | 120720.4 | 119963.8 | 110768.5 | 132133.3 | 148463.2 | 98263.79 |
| P05164 | Myeloperoxidase MPO          | 0        | 92862.33 | 13393.28 | 22021.39 | 7518.567 | 63564.42 |
| P05543 | Thyroxine-binding SERPINA7   | 592912.3 | 362967.4 | 613229.8 | 464178   | 452412.8 | 459061.5 |
| P05546 | Heparin cofactor SERPIND1    | 3800120  | 2785444  | 3182836  | 2200573  | 2536457  | 3519430  |
| P05787 | Keratin, type KRT8           | 525346.4 | 548319.7 | 2742633  | 991116.1 | 718376.2 | 475234.6 |
| P05976 | Myosin light chain MYL1      | 52601.44 | 62954.24 | 55715.6  | 47827.31 | 44870.41 | 58344.4  |
| P06312 | Immunoglobulin IGKV4-1       | 17458.69 | 616055.4 | 148903.6 | 254671.3 | 592531.3 | 38722.4  |
| P06727 | Apolipoprotein APOA4         | 1123669  | 1640343  | 2537581  | 2684832  | 1367434  | 2254604  |
| P07195 | L-lactate dehydrogenase LDHB | 16090.81 | 46555.36 | 28566.93 | 40155.64 | 44408.52 | 25036.14 |
| P07307 | Asialoglycoprotein ASGR2     | 9306.073 | 25270.48 | 41019.77 | 32075.13 | 5456.507 | 8748.148 |
| P07357 | Complement C8A               | 716868.1 | 508347.8 | 746600.9 | 458584.1 | 546491.6 | 451663.4 |
| P07360 | Complement C8G               | 827600.8 | 680072.3 | 992262.1 | 809855.9 | 944287.2 | 701128.4 |
| P07737 | Profilin-1 PFN1              | 85325.01 | 0        | 12660.69 | 25243.85 | 48615.7  | 30647.83 |
| P07996 | Thrombospondin THBS1         | 28215.03 | 17025.62 | 15171.46 | 32865.6  | 37528.53 | 16053.15 |
| P08311 | Cathepsin CTSG               | 354950.3 | 15399.15 | 15150.43 | 439142.3 | 19208.84 | 0        |
| P08519 | Apolipoprotein LPA           | 1470609  | 3325035  | 2252835  | 2112946  | 2529394  | 1218544  |
| P08575 | Receptor-type ITPRC          | 0        | 0        | 0        | 0        | 124675.4 | 1002282  |
| P08603 | Complement CFH               | 6155923  | 4506251  | 5652911  | 4290026  | 4755002  | 4901379  |
| P08670 | Vimentin VIM                 | 11113.83 | 8950.975 | 3185.755 | 15379.47 | 8281.766 | 7924.231 |
| P08697 | Alpha-2-antiplasmin SERPINF2 | 4531743  | 3244711  | 4520499  | 3698770  | 3065416  | 4329207  |
| P08779 | Keratin, type KRT16          | 87149.48 | 16164.89 | 108817.5 | 40359.71 | 0        | 37605.29 |
| P09172 | Dopamine DBH                 | 22357.76 | 18454.38 | 7868.617 | 46088.35 | 44752.99 | 17547.55 |
| P09871 | Complement C1S               | 4627655  | 3724697  | 4367408  | 2592195  | 2673492  | 2587975  |
| P0C0L4 | Complement C4A               | 501157.3 | 372079.4 | 211341.6 | 168308.1 | 796041.6 | 143346.6 |
| P0C0L5 | Complement C4B               | 13382657 | 6107268  | 10616108 | 10002439 | 7615706  | 10104703 |
| P0DJ18 | Serum amyloid A SAA1         | 9356962  | 2098224  | 6253297  | 25801712 | 6000955  | 11688973 |
| P0DJ19 | Serum amyloid A SAA2         | 845834.8 | 265238.4 | 506389.3 | 1045201  | 110548.7 | 668031.8 |
| P0DOX2 | Immunoglobulin alpha         | 544560.7 | 488573.1 | 954143   | 332827.6 | 375252.4 | 291711.7 |
| P0DOX3 | Immunoglobulin delta         | 347082.6 | 457222.2 | 571023.8 | 373241.5 | 496729.2 | 385842.3 |
| P0DOX4 | Immunoglobulin epsilon       | 10336818 | 14645253 | 11419164 | 630964.3 | 6819408  | 14722533 |
| P0DOX5 | Immunoglobulin gamma         | 128960   | 440158.5 | 80961.05 | 70608.02 | 171315.9 | 121092   |

|        |                     |          |          |          |          |          |          |
|--------|---------------------|----------|----------|----------|----------|----------|----------|
| P0DOX6 | Immunoglobulin mu l | 0        | 0        | 1665530  | 0        | 127349.6 | 0        |
| P0DOX7 | Immunoglobulin kapı | 25489946 | 34110412 | 25837710 | 30608058 | 28198312 | 18114124 |
| P0DOX8 | Immunoglobulin lamk | 3725390  | 4388946  | 5012275  | 3538180  | 4191968  | 4249662  |
| P0DP01 | Immunogl.IGHV1-8    | 77675.94 | 154282.7 | 163216.3 | 132279.8 | 153448.7 | 150306.2 |
| P0DP04 | Immunogl.IGHV3-43I  | 45217.16 | 60660.64 | 54126.21 | 43880.71 | 54706.76 | 21216.64 |
| P0DP08 | Immunogl.IGHV4-38-  | 0        | 0        | 0        | 321615.3 | 0        | 0        |
| P10586 | Receptor-ıP1PRF     | 0        | 6564.375 | 8242.472 | 0        | 6304.379 | 4498.033 |
| P11021 | Endoplasır HSPA5    | 26784.91 | 19183.8  | 20200.48 | 25866    | 26453.66 | 20034.1  |
| P11226 | Mannose- MBL2       | 147321.6 | 97038.95 | 132664.7 | 254967.6 | 351110.8 | 109214.6 |
| P12273 | Prolactin-ı PIP     | 3966.667 | 2990.404 | 35694.97 | 0        | 0        | 8003.219 |
| P12882 | Myosin-1 MYH1       | 16362.78 | 15090.73 | 12844.82 | 17877.44 | 14897.26 | 13800.54 |
| P13645 | Keratin, tyı KRT10  | 94625.7  | 211132.6 | 800537.6 | 458339.3 | 342906.3 | 299955.3 |
| P13647 | Keratin, tyı KRT5   | 34092.24 | 23385.98 | 107869.6 | 59272.09 | 64887.46 | 37577.07 |
| P13671 | Compleme C6         | 1432941  | 872679.8 | 1191691  | 1079411  | 989723.1 | 1047105  |
| P14618 | Pyruvate k PKM      | 22592.59 | 16524.49 | 8689.287 | 20553.17 | 37281.08 | 16328.53 |
| P14625 | Endoplasır HSP90B1  | 43744.68 | 25536.38 | 38062.94 | 30706.4  | 32547.58 | 12689.23 |
| P14780 | Matrix met MMP9     | 0        | 3912.86  | 11247.23 | 40663.14 | 32190.03 | 5536.853 |
| P15169 | Carboxype CPN1      | 532276.6 | 326077.3 | 456727.6 | 524441.4 | 464442.5 | 711286.8 |
| P15814 | Immunogl.IGLL1      | 203542   | 454061.8 | 58173.68 | 566614.1 | 89539.25 | 130643.2 |
| P15924 | Desmoplaf DSP       | 0        | 6590.14  | 8441.153 | 13977.1  | 0        | 0        |
| P18065 | Insulin-like IGFBP2 | 55436.76 | 84958.98 | 44603.4  | 23570.03 | 52892.88 | 30148.36 |
| P18428 | Lipopolysa LBP      | 1556318  | 778216.1 | 1084384  | 1120492  | 815630.6 | 708037.5 |
| P19320 | Vascular cı VCAM1   | 15861.28 | 28015.86 | 15341.84 | 10700.58 | 11300.5  | 15488.31 |
| P19652 | Alpha-1-a ORM2      | 5666543  | 3019764  | 3915709  | 4395888  | 2758223  | 4355813  |
| P19827 | Inter-alphı ITIH1   | 7452241  | 6298260  | 7034448  | 4711520  | 5514481  | 7766354  |
| P20160 | Azurocidin AZU1     | 0        | 0        | 0        | 0        | 164015.8 | 0        |
| P20851 | C4b-bindin C4BPB    | 613000.8 | 558308.4 | 657668.9 | 617217.8 | 642777.8 | 519133.8 |
| P21333 | Filamin-A FLNA      | 22837.62 | 130938.2 | 2336.984 | 17436.21 | 25202.61 | 5309.702 |
| P22792 | Carboxype CPN2      | 1045123  | 812791.7 | 1094585  | 928151.4 | 987856.8 | 1083364  |
| P23083 | Immunogl.IGHV1-2    | 4107647  | 6660133  | 3074105  | 3805623  | 3163972  | 6414706  |
| P23142 | Fibulin-1 FBLN1     | 232174.1 | 209909.8 | 241974.6 | 179466.6 | 305466.3 | 150412.8 |
| P23284 | Peptidyl-p PPIB     | 10317.06 | 3985.267 | 0        | 3705.398 | 7078.335 | 4465.281 |
| P23470 | Receptor-ıP1PRG     | 10919.66 | 5936.786 | 10460.77 | 7959.16  | 8456.982 | 6980.843 |
| P24387 | Corticotroı CRHBP   | 6377.203 | 2605.287 | 6372.246 | 0        | 4572.075 | 20743.57 |
| P24592 | Insulin-like IGFBP6 | 30742.38 | 42257.91 | 27243.13 | 23975.2  | 35569.97 | 28577.43 |
| P26038 | Moesin MSN          | 114793.6 | 27551.89 | 23274.79 | 25479.3  | 31761.76 | 13519.22 |
| P27169 | Serum par. PON1     | 3393562  | 2412637  | 2873541  | 1701870  | 2430373  | 4421320  |
| P27487 | Dipeptidyl DPP4     | 0        | 16328.78 | 16609.42 | 12998.82 | 15834.5  | 11684.83 |
| P30044 | Peroxiredc PRDX5    | 20725.23 | 5496.544 | 22470.68 | 0        | 0        | 0        |
| P33151 | Cadherin-ı CDH5     | 44493.27 | 73391.23 | 68562.36 | 46363.8  | 57101.31 | 50277.59 |
| P33908 | Mannosyl- MAN1A1    | 101964   | 82001.17 | 94854.71 | 65380.8  | 48087.09 | 107799.3 |
| P34096 | Ribonucleı RNASE4   | 27515.38 | 21133.83 | 25761.71 | 22258.58 | 21476.23 | 22521.95 |
| P35527 | Keratin, tyı KRT9   | 176345.9 | 217320.6 | 728202.7 | 317546.4 | 333090   | 10414.37 |
| P35542 | Serum amy SAA4      | 1688898  | 774105.4 | 781994.9 | 819897   | 1137243  | 781505.8 |
| P35908 | Keratin, tyı KRT2   | 32336.42 | 57332.88 | 279053.2 | 195541.5 | 153219.6 | 119695.6 |
| P43251 | Biotinidase BTD     | 268992.1 | 232087   | 268725.6 | 262454.4 | 220616.4 | 181912.8 |
| P43652 | Afamin AFM          | 2079214  | 1858751  | 2255086  | 1828606  | 1935832  | 2981751  |
| P48740 | Mannan-b MASP1      | 135445.4 | 91761.45 | 120158   | 99946.55 | 131236.8 | 75123.92 |
| P58166 | Inhibin bet INHBE   | 0        | 0        | 0        | 0        | 0        | 27903.93 |
| P59665 | Neutrophil DEFA1    | 716223   | 809436.6 | 645385   | 551540.8 | 468267.5 | 658926.3 |
| P60709 | Actin, cyto ACTB    | 787612.9 | 380611.7 | 249117.4 | 551533.9 | 690129.1 | 329747.2 |
| P78492 | Inter-alphı ITIL    | 0        | 12928.75 | 10543.09 | 4557.382 | 0        | 8965.266 |
| P80108 | Phosphatic GPLD1    | 269153.2 | 298486.5 | 329871.2 | 360670   | 351429.9 | 308091.9 |
| P80723 | Brain acid BASP1    | 4666.771 | 7866.399 | 5671.876 | 5568.116 | 5981.555 | 5542.201 |
| P81605 | Dermcidin DCD       | 134322   | 164811   | 155368.2 | 175508.6 | 121768.7 | 86327.55 |
| Q02985 | Compleme CFHR3      | 2407.501 | 9423.145 | 0        | 0        | 0        | 0        |
| Q03591 | Compleme CFHR1      | 1926502  | 1167763  | 1394091  | 1985640  | 730443.2 | 978508.3 |
| Q04695 | Keratin, tyı KRT17  | 0        | 0        | 54015.84 | 29989.85 | 0        | 0        |

|        |                               |          |          |          |          |          |          |
|--------|-------------------------------|----------|----------|----------|----------|----------|----------|
| Q04756 | Hepatocyt: HGFAC              | 453338.7 | 343434.6 | 376720.3 | 344032.7 | 293804.6 | 317573.9 |
| Q06033 | Inter-alph: ITIH3             | 1941269  | 1359129  | 1521068  | 610109.2 | 930750.4 | 1138817  |
| Q07507 | Dermatopr: DPT                | 0        | 8094.192 | 7637.77  | 0        | 0        | 0        |
| Q07954 | Prolow-de: LRP1               | 31873.68 | 20221.21 | 17920.45 | 29808.56 | 8108.981 | 6123.036 |
| Q08554 | Desmocoll: DSC1               | 3017.325 | 0        | 6094.084 | 3876.441 | 0        | 0        |
| Q08830 | Fibrinogen: FGL1              | 88024.44 | 19030.54 | 66808.89 | 122927.6 | 111226.3 | 60996.82 |
| Q09666 | Neuroblas: AHNAK              | 5123.492 | 3254.181 | 12146.03 | 4020.288 | 14715.76 | 5748.376 |
| Q0IIN1 | Keratin 77: KRT77             | 0        | 0        | 1228860  | 7794.22  | 167176.6 | 448577.8 |
| Q0KKI6 | Immunoblobulin light          | 0        | 66385.78 | 40581.46 | 113739.3 | 31569.85 | 34541.56 |
| Q0ZCF2 | Immunoglobulin heavy          | 1149017  | 1124449  | 2126158  | 1148967  | 910320.2 | 1134453  |
| Q0ZCF6 | Immunoglobulin heavy          | 487833.1 | 443136.1 | 2705916  | 425697.8 | 1779546  | 1835932  |
| Q0ZCF9 | Immunoglobulin heavy          | 81215.08 | 176518.1 | 333745.5 | 758150   | 566508.5 | 0        |
| Q0ZCH0 | Immunoglobulin heavy          | 1053366  | 1369343  | 867053.1 | 1241828  | 1516693  | 1196374  |
| Q0ZCH5 | Immunoglobulin heavy          | 56360.99 | 90801.77 | 72516.57 | 163708.1 | 99795.34 | 223671.3 |
| Q0ZCH7 | Immunoglobulin heavy          | 223973.3 | 1563896  | 568432.8 | 821898.5 | 1245829  | 429260.5 |
| Q0ZCH8 | Immunoglobulin heavy          | 13998.49 | 65185.36 | 56227.09 | 24632.15 | 35810.12 | 7223.419 |
| Q0ZCH9 | Immunoglobulin heavy          | 625498.6 | 960498.8 | 572574.4 | 481347.3 | 409204.3 | 561038.9 |
| Q0ZCI0 | Immunoglobulin heavy          | 111866.4 | 148024.1 | 115657.2 | 180019   | 160022.5 | 195522   |
| Q0ZCI2 | Immunoglobulin heavy          | 572405.9 | 970676.8 | 886546.9 | 456899.1 | 424687.5 | 479597.5 |
| Q0ZCI6 | Immunoglobulin heavy          | 2007248  | 3406167  | 1355815  | 2629350  | 1443808  | 3223541  |
| Q0ZCI8 | Immunoglobulin heavy          | 376791   | 1042380  | 235784.2 | 618574.6 | 717730.8 | 107554.7 |
| Q0ZCJ1 | Immunoglobulin heavy          | 236043.6 | 299146.6 | 238258.4 | 375794.1 | 548340.6 | 182068.7 |
| Q0ZCJ6 | Immunoglobulin heavy          | 0        | 0        | 272314.3 | 0        | 0        | 11809.79 |
| Q12841 | Follistatin-: FSTL1           | 0        | 0        | 4572.474 | 4546.419 | 1878.331 | 1333.663 |
| Q13103 | Secreted p: SPP2              | 93919.66 | 151158.4 | 126604.1 | 90926.94 | 99659.55 | 111444.3 |
| Q13201 | Multimeric: MMRN1             | 0        | 4994219  | 0        | 6937.538 | 2797.553 | 667051.8 |
| Q13219 | Pappalysin: PAPPA             | 325792.2 | 269145.3 | 282513.2 | 37434.23 | 304863.6 | 360039.8 |
| Q13790 | Apolipoprotein: APOF          | 1042561  | 598939.7 | 907238.4 | 795821.1 | 687977.4 | 474759.7 |
| Q14126 | Desmoglein: DSG2              | 0        | 17821.79 | 4445.852 | 0        | 14566.2  | 19270.59 |
| Q14520 | Hyaluronan: HABP2             | 886802.7 | 724713.3 | 879801.7 | 547835.6 | 673093.2 | 612885.9 |
| Q14651 | Plastin-1: PLS1               | 23400.46 | 12859.45 | 16678.13 | 18097.71 | 0        | 12938.11 |
| Q15113 | Procollagen: PCOLCE           | 37517.92 | 34805.64 | 48860.28 | 28995.8  | 31586.1  | 27496.44 |
| Q15166 | Serum par.: PON3              | 801339.6 | 473369.3 | 620526.4 | 336765.7 | 529263.2 | 1090464  |
| Q15485 | Ficolin-2: FCN2               | 60481.64 | 36804.55 | 48901.41 | 62371.73 | 49089.38 | 149987.5 |
| Q15828 | Cystatin-M: CST6              | 10425.47 | 0        | 3112.669 | 0        | 0        | 0        |
| Q2L9S7 | Alpha-1-a: AAT                | 276786.1 | 332326.8 | 435672.4 | 83425.95 | 149687.9 | 392183.3 |
| Q4TZM4 | Hemoglobin: HBB               | 663228.6 | 266011.2 | 861880.9 | 374230.9 | 555355.4 | 508587.6 |
| Q53HT9 | Complement component          | 0        | 360477.2 | 0        | 0        | 323917.3 | 0        |
| Q53YY1 | Angiotensin: AGT              | 457861.8 | 568317.1 | 341283.9 | 623370.6 | 595639.1 | 334848.2 |
| Q569I7 | Uncharacterized protein       | 239424.3 | 313363.1 | 515550.9 | 763581.9 | 960558   | 703172   |
| Q56G89 | Serum albumin                 | 5431749  | 7038423  | 4149056  | 4347964  | 6313583  | 6123903  |
| Q5CZ94 | Uncharacterized: DKFZp781     | 156843   | 243746.3 | 338018.2 | 161574.1 | 267892.5 | 158586.5 |
| Q5D862 | Filaggrin-2: FLG2             | 0        | 0        | 4616.4   | 0        | 0        | 0        |
| Q5EFE5 | Anti-RhD monoclonal antibody  | 59820.11 | 60729.79 | 48093.09 | 76386.88 | 61715.84 | 45349.47 |
| Q5EFE6 | Anti-RhD monoclonal antibody  | 91190.72 | 294571.8 | 233260.3 | 185077.5 | 261088.4 | 257005.1 |
| Q5FWF9 | IGL@ protein: IGL@            | 8760972  | 10731377 | 10152025 | 8929528  | 7425942  | 17714214 |
| Q5IWS5 | Intellectin 1: ITLN1          | 15385.14 | 33490.86 | 13815.93 | 9848.926 | 28403.51 | 14385.42 |
| Q5NV67 | V1-11 protein: V1-11          | 443067.1 | 489809.9 | 647759.4 | 437695.4 | 390431.1 | 278453.5 |
| Q5NV69 | V1-13 protein: V1-13          | 1258213  | 1902899  | 1584778  | 1203294  | 2123599  | 2827908  |
| Q5NV74 | V2-14 protein: V2-14          | 1292343  | 1222592  | 951543.1 | 1829808  | 1134124  | 2279660  |
| Q5NV79 | V5-4 protein: V5-4            | 29374.22 | 207888.5 | 424385.8 | 96149.85 | 0        | 0        |
| Q5NV81 | V1-16 protein: V1-16          | 9449928  | 12081037 | 9592071  | 7496175  | 9381406  | 7245456  |
| Q5NV82 | V4-2 protein: V4-2            | 91991.63 | 20073.65 | 79593.21 | 8910.725 | 115093.6 | 239493.2 |
| Q5NV91 | V2-19 protein: V2-19          | 132882.9 | 188394   | 254612   | 194524.7 | 174400.9 | 106591.7 |
| Q5NV92 | V5-6 protein: V5-6            | 1181054  | 948387.4 | 958453.2 | 2084594  | 894541.6 | 485673.5 |
| Q65ZC9 | Single-chain scFv             | 813731.1 | 796633   | 1056067  | 1043715  | 911611.4 | 1122620  |
| Q68CK4 | Leucine-rich repeat: HMFT1766 | 400081.9 | 58603.34 | 558457.4 | 566285.1 | 428041.8 | 612620.8 |
| Q68CN4 | Uncharacterized: DKFZp686     | 540079.3 | 9908237  | 14684877 | 640942.5 | 8232941  | 19396054 |

|        |                         |          |          |          |          |          |          |          |
|--------|-------------------------|----------|----------|----------|----------|----------|----------|----------|
| Q68DR3 | Uncharacterized protein | DKFZp779 | 1657721  | 0        | 961991.9 | 1088853  | 1258875  | 692479.6 |
| Q68DS3 | Uncharacterized protein | DKFZp686 | 109625.9 | 33566.17 | 179012.3 | 182685   | 239364.8 | 61504.15 |
| Q6DHW4 | Uncharacterized protein |          | 6008.082 | 50655.57 | 21661.22 | 252170.3 | 32764.46 | 20523.68 |
| Q6EMK4 | Vasorin                 | VASN     | 38567.8  | 29120.37 | 31774.12 | 30593.68 | 37068.43 | 28554.1  |
| Q6GMX0 | Uncharacterized protein |          | 32199.64 | 299162.6 | 173481.3 | 183508.1 | 171294.6 | 108529.5 |
| Q6IN99 | IGL@ prot               | IGL@     | 0        | 0        | 0        | 8374.297 | 0        | 0        |
| Q6IPQ0 | IGL@ prot               | IGL@     | 25533.34 | 92721.23 | 48533.83 | 49325.7  | 44339.52 | 76733    |
| Q6LAM1 | Heavy chain of factor   |          | 161577.5 | 77905.02 | 142534.9 | 148946   | 73281.59 | 65756.7  |
| Q6LBV5 | DNA rearranged by a     |          | 59829.47 | 44955.49 | 0        | 31819.61 | 32701.57 | 33215.52 |
| Q6MZL2 | Uncharacterized protein | DKFZp686 | 28228.89 | 45189.65 | 59114.45 | 14066    | 23691    | 38180.11 |
| Q6MZQ6 | Uncharacterized protein | DKFZp686 | 1698898  | 2278890  | 854498.3 | 3741660  | 1405380  | 1856730  |
| Q6MZU6 | Uncharacterized protein | DKFZp686 | 4867162  | 8528442  | 5924677  | 6648767  | 5450657  | 10846584 |
| Q6MZX7 | Uncharacterized protein | DKFZp686 | 15658147 | 15704199 | 13844302 | 16455867 | 14282807 | 11473345 |
| Q6MZX9 | Uncharacterized protein | DKFZp686 | 83864.63 | 130171.2 | 57785.59 | 101216.8 | 82537.41 | 122144.9 |
| Q6N041 | Uncharacterized protein | DKFZp686 | 7328.644 | 0        | 0        | 87196.99 | 0        | 93820.97 |
| Q6N091 | Uncharacterized protein | DKFZp686 | 2709628  | 5011231  | 3412425  | 3343630  | 3475678  | 4679724  |
| Q6N092 | Uncharacterized protein | DKFZp686 | 11180483 | 1211834  | 5758509  | 1132206  | 3361871  | 5060558  |
| Q6N093 | Uncharacterized protein | DKFZp686 | 196668.4 | 410547.6 | 152425.5 | 262598.9 | 199064.9 | 254509.1 |
| Q6N094 | Uncharacterized protein | DKFZp686 | 272961.2 | 471883.8 | 334441.8 | 438965.6 | 196086   | 77772.99 |
| Q6N095 | Uncharacterized protein | DKFZp686 | 0        | 65953.45 | 0        | 0        | 0        | 0        |
| Q6N096 | Uncharacterized protein | DKFZp686 | 3599.259 | 24897.35 | 0        | 9788.063 | 0        | 0        |
| Q6N097 | Uncharacterized protein | DKFZp686 | 106623.2 | 118903   | 83680.37 | 73318.67 | 367809.7 | 274864.7 |
| Q6P089 | IGH@ prot               | IGH@     | 2210018  | 3606954  | 2995207  | 379885.2 | 4062247  | 2125742  |
| Q6P2J1 | Uncharacterized protein |          | 0        | 24206.84 | 31147.36 | 0        | 0        | 0        |
| Q6P5S3 | Uncharacterized protein |          | 88033.54 | 31426.19 | 0        | 0        | 0        | 36613.29 |
| Q6P5S8 | IGK@ prot               | IGK@     | 618977.2 | 1123693  | 901536   | 1196721  | 794983.5 | 659417.3 |
| Q6PIK1 | IGL@ prot               | IGL@     | 289650.2 | 210840.8 | 430702   | 158343.6 | 135323.4 | 179423.7 |
| Q6PIL8 | IGK@ prot               | IGK@     | 508436.8 | 1061791  | 727432.3 | 1046959  | 724926   | 761143.1 |
| Q6PIQ7 | IGL@ prot               | IGL@     | 135778.1 | 91947.18 | 141672.5 | 70220.4  | 95239.46 | 86968.02 |
| Q6UW49 | Sperm eq                | SPESP1   | 1757914  | 2711863  | 2184616  | 1285203  | 1568244  | 5375766  |
| Q6UWP8 | Suprabasir              | SBSN     | 2955.635 | 1685.186 | 0        | 0        | 155066.9 | 1083.415 |
| Q6UXB8 | Peptidase               | PI16     | 33210.43 | 40299.23 | 49251.61 | 30721.34 | 35332.63 | 18203.35 |
| Q6YHK3 | CD109 ant               | CD109    | 20225.12 | 17491.94 | 9116.04  | 4352.121 | 10516.49 | 13990.55 |
| Q6ZNX5 | cDNA FLJ26936 fis, cl   |          | 51381.41 | 83838.24 | 85356.36 | 136189.1 | 55485.73 | 12417.94 |
| Q6ZP85 | cDNA FLJ26301 fis, cl   |          | 475779.6 | 318379.3 | 486551.7 | 500122.1 | 372362   | 439382.7 |
| Q6ZVX0 | cDNA FLJ41981 fis, cl   |          | 122671.1 | 0        | 145818   | 35339.59 | 58489.23 | 60862.89 |
| Q6ZW64 | cDNA FLJ41552 fis, cl   |          | 148472.3 | 17372.44 | 188724.2 | 26621.98 | 16634.28 | 31711.93 |
| Q701L7 | Type II hair            | KRTHB2   | 0        | 12212.65 | 0        | 0        | 14094.53 | 0        |
| Q76LX8 | A disintegr             | ADAMTS1  | 7951.259 | 5801.455 | 5495.756 | 9498     | 11091.69 | 8744.382 |
| Q7M4S4 | Granulocyte inhibitory  |          | 423373.4 | 303323.4 | 498409.5 | 288579.2 | 512705.8 | 1699215  |
| Q7Z2U7 | Uncharacterized protein |          | 10495.06 | 78250.59 | 127129.6 | 130232.8 | 185125.7 | 139958   |
| Q7Z351 | Uncharacterized protein | DKFZp686 | 5263222  | 1285052  | 3228183  | 581131.8 | 897403.9 | 351802.1 |
| Q7Z374 | Uncharacterized protein | DKFZp686 | 33402.96 | 40946.63 | 52104.2  | 46405.72 | 87736.3  | 60606.81 |
| Q7Z379 | Uncharacterized protein | DKFZp686 | 270695.5 | 1592831  | 483269.4 | 211494.5 | 1301676  | 163284.3 |
| Q86TT1 | Full-length cDNA clon   |          | 932551.1 | 2007532  | 1100473  | 1272288  | 2113035  | 2406428  |
| Q86U17 | Serpin A11              | SERPINA1 | 20381.46 | 18170.63 | 14130.92 | 16203.52 | 23054.94 | 14955.41 |
| Q86UD1 | Out at first OAF        |          | 62387.23 | 64143.56 | 59479.76 | 47574.51 | 40306.49 | 72537.84 |
| Q86UX7 | Fermitin fa             | FERMT3   | 22969.8  | 0        | 12875.95 | 16054.13 | 21198.16 | 8549.277 |
| Q86X29 | Lipolysis-s             | LSR      | 0        | 10457.63 | 14876.01 | 8594.125 | 81181.14 | 0        |
| Q86YQ1 | Hemoglob                | HBA2     | 219034.8 | 85557.59 | 134954.7 | 66901.02 | 94783.85 | 5748.799 |
| Q86YZ3 | Hornerin                | HRNR     | 0        | 0        | 14005.2  | 10679.58 | 9160.144 | 3694.278 |
| Q8IZD7 | Anti-thyroglobulin he   |          | 200427.1 | 1917169  | 358429.1 | 1751685  | 1362711  | 380865.1 |
| Q8J008 | Protein C ( PROC        |          | 0        | 0        | 0        | 82087.07 | 88131.66 | 80569.95 |
| Q8N1N4 | Keratin, ty             | KRT78    | 53462.23 | 2864.983 | 24410.32 | 98447.16 | 51246.8  | 32504.67 |
| Q8N5F4 | IGL@ prot               | IGL@     | 2436584  | 2264932  | 3118692  | 2601158  | 1973391  | 2531462  |
| Q8NBP7 | Proprotein              | PCSK9    | 16138.02 | 16152.55 | 8443.666 | 11735.12 | 4972.494 | 11153.71 |
| Q8NCL6 | cDNA FLJ90170 fis, cl   |          | 1882225  | 1718080  | 1826773  | 1098280  | 975580.8 | 673756.4 |
| Q8NEJ1 | Uncharacterized protein |          | 69547.97 | 217663   | 70728.58 | 122472.2 | 155077.1 | 5660.883 |

|        |                                   |          |          |          |          |          |          |
|--------|-----------------------------------|----------|----------|----------|----------|----------|----------|
| Q8NF20 | FLJ00382 ꞑ FLJ00382               | 141783.6 | 23575.38 | 37949.98 | 0        | 0        | 0        |
| Q8TCD0 | Uncharacterized prot              | 19921972 | 23607334 | 19788184 | 18308650 | 21875232 | 26083740 |
| Q8TCZ8 | Apolipoprotein APOE               | 0        | 0        | 0        | 78930.99 | 0        | 0        |
| Q8WWZ8 | Oncoprotein OIT3                  | 53382.83 | 0        | 65798.69 | 2614.946 | 33955.4  | 0        |
| Q92496 | Complement CFHR4                  | 187980.2 | 227577.6 | 92345.43 | 165285.5 | 151579.8 | 130894.3 |
| Q92743 | Serine protease HTRA1             | 13895.92 | 5436.459 | 6608.235 | 8010.88  | 4117.918 | 3636.92  |
| Q92859 | Neogenin NEO1                     | 0        | 19525.61 | 16363.94 | 13356.33 | 23732.3  | 15052.33 |
| Q96HR3 | Mediator corepressor MED30        | 61058.49 | 62231.12 | 65609.96 | 92273.82 | 65531.39 | 85892.13 |
| Q96JD1 | Amyloid lambda 6 ligand           | 161598.9 | 448154.2 | 456979.1 | 271542.1 | 366496.2 | 443696.2 |
| Q96JD2 | Amyloid lambda 6 ligand           | 0        | 0        | 111617.5 | 32453.13 | 0        | 0        |
| Q96K68 | cDNA FLJ14473 fis, clone          | 18696076 | 11021025 | 20570824 | 6258953  | 11475604 | 11228674 |
| Q96PD5 | N-acetylmethyltransferase PGLYRP2 | 1930822  | 1575215  | 1737407  | 1461555  | 1667794  | 1528641  |
| Q96QS0 | Putative matrix cell associated   | 31813.05 | 42490.77 | 52613.38 | 35056.66 | 65602.79 | 37863.16 |
| Q96SB0 | Anti-streptococcal/antigen        | 23545.98 | 182557.9 | 60476.78 | 117931.9 | 77255.63 | 39721.96 |
| Q9BWP8 | Collectin-1 COLEC11               | 43118.09 | 30468.4  | 47515.74 | 29733.55 | 41275.63 | 36649.09 |
| Q9BYE9 | Cadherin-1 CDHR2                  | 23558.06 | 0        | 163307.9 | 0        | 2067.819 | 85402.14 |
| Q9H804 | cDNA FLJ14022 fis, clone          | 0        | 6853.617 | 0        | 0        | 0        | 5927.462 |
| Q9HCC1 | Single chain Fv (Fragment         | 38783.56 | 0        | 92845.81 | 38135.96 | 35212.16 | 291732.4 |
| Q9HDC9 | Adipocyte APMAP                   | 96289.78 | 86967.63 | 52839.05 | 81272.48 | 100125.1 | 67525.55 |
| Q9NPP6 | Immunoglobulin heavy chain        | 23138976 | 27526096 | 49139400 | 17996898 | 24738296 | 38919108 |
| Q9NSD6 | This CDS feature is incomplete    | 1222058  | 1451091  | 1964441  | 1729517  | 1352625  | 1756666  |
| Q9NWQ8 | Phosphoprotein PAG1               | 2637906  | 3275420  | 36896.87 | 1347557  | 49457.17 | 0        |
| Q9NXP8 | Complement C1RL                   | 254016   | 219763.6 | 256734   | 164937.7 | 170734.5 | 150385.6 |
| Q9UGM5 | Fetuin-B FETUB                    | 213792.1 | 247493.2 | 184571.3 | 169261.7 | 188680.6 | 209729.4 |
| Q9UHG3 | Prenylcysteine PCYOX1             | 32557.39 | 50142.18 | 47034.95 | 54650.55 | 57141.13 | 46147.31 |
| Q9UK54 | Hemoglobin HBB                    | 20441.7  | 0        | 26832.55 | 13291.78 | 15825.42 | 15549.04 |
| Q9UL70 | Myosin-reactive immunoglobulin    | 60086.3  | 33195.66 | 44824.57 | 33847.29 | 94985.44 | 45313.59 |
| Q9UL72 | Myosin-reactive immunoglobulin    | 86529.68 | 264060.6 | 46769.32 | 0        | 191165   | 212472.3 |
| Q9UL73 | Myosin-reactive immunoglobulin    | 173403.3 | 223333.5 | 220193.3 | 357788.1 | 432721.8 | 87575.77 |
| Q9UL76 | Myosin-reactive immunoglobulin    | 317732.3 | 197665.7 | 125360.7 | 101225.5 | 213548.8 | 123011.1 |
| Q9UL82 | Myosin-reactive immunoglobulin    | 636538.4 | 1116080  | 711108.2 | 896795.1 | 564514.4 | 699005.4 |
| Q9UL84 | Myosin-reactive immunoglobulin    | 910424.3 | 1436699  | 627989.3 | 1006084  | 1316437  | 964156.8 |
| Q9UL85 | Myosin-reactive immunoglobulin    | 2611878  | 4758242  | 5679451  | 3514012  | 4492257  | 2940150  |
| Q9UL86 | Myosin-reactive immunoglobulin    | 1499133  | 350395.7 | 320988.8 | 240355.5 | 194503.8 | 1509417  |
| Q9UL88 | Myosin-reactive immunoglobulin    | 885499.7 | 1133176  | 1007774  | 920450.3 | 1264071  | 946000.7 |
| Q9UL89 | Myosin-reactive immunoglobulin    | 304811.9 | 1342356  | 451703.6 | 473477.8 | 770654.3 | 722155.8 |
| Q9UL92 | Myosin-reactive immunoglobulin    | 1555808  | 1554321  | 1789449  | 1517615  | 1376909  | 2725881  |
| Q9UL93 | Myosin-reactive immunoglobulin    | 81010.2  | 78263.81 | 28213.3  | 57391.55 | 116034.7 | 60460.24 |
| Q9UL95 | Myosin-reactive immunoglobulin    | 0        | 31204.58 | 0        | 0        | 0        | 18331.33 |
| Q9ULB6 | Immunoglobulin VH                 | 110112.1 | 115915   | 247963.6 | 93494.61 | 434403.7 | 253902.2 |
| Q9UNI6 | Dual specificity DUSP12           | 17047.19 | 21959.51 | 33964.86 | 0        | 14550.8  | 112137.6 |
| Q9UNU2 | Complement C4B                    | 293597.3 | 0        | 352351.3 | 0        | 0        | 434463.1 |
| Q9Y279 | V-set and VSIG4                   | 0        | 7543.066 | 0        | 0        | 0        | 5750.977 |
| Q9Y509 | VH3 protein VH3                   | 460003.7 | 390021.3 | 418657.7 | 747407.9 | 784885.8 | 800219.5 |
| Q9Y623 | Myosin-4 MYH4                     | 22419.23 | 57222    | 24906.57 | 19656.01 | 15839.75 | 15281.91 |
| Q9Y6R7 | IgGFc-binding FCGBP               | 128912.6 | 265001.3 | 115585.8 | 111066   | 77507.94 | 127120   |
| S6AWD3 | IgG L chain                       | 1062441  | 1680900  | 1685553  | 1178565  | 1131467  | 1484351  |
| S6AWF0 | IgG H chain                       | 40293.75 | 151765   | 137591.8 | 43670.53 | 64621.96 | 116359.7 |
| S6B291 | IgG H chain                       | 241256.8 | 686133.1 | 181465   | 312154.5 | 469556.6 | 82659.08 |
| S6B2A6 | IgG H chain                       | 351872.1 | 302694.6 | 333490   | 248139.5 | 248682.8 | 175097.5 |
| S6BAM6 | IgG H chain                       | 7869.441 | 32683.66 | 105511.5 | 38411.09 | 112319.3 | 40558.16 |
| S6BAQ4 | IgG H chain                       | 2180689  | 20177440 | 14994946 | 2349616  | 2875388  | 3079180  |
| S6BAR0 | IgG L chain                       | 6577318  | 14144867 | 7039595  | 7342937  | 7557064  | 22034528 |
| S6BGD4 | IgG H chain                       | 1408696  | 1839721  | 2902390  | 1840269  | 1768388  | 3135712  |
| S6BGD6 | IgG L chain                       | 2094976  | 3283224  | 3024318  | 2710490  | 3156195  | 2181976  |
| S6BGE0 | IgG H chain                       | 2218126  | 3738769  | 2305427  | 2713789  | 2670458  | 2762108  |
| S6C4Q7 | IgG H chain                       | 14787    | 39460.29 | 23518.81 | 0        | 12393.66 | 42193.31 |
| S6C4R2 | IgG H chain                       | 12681.77 | 0        | 27911.73 | 154501.5 | 46372.02 | 0        |

|        |                     |          |          |          |          |          |          |
|--------|---------------------|----------|----------|----------|----------|----------|----------|
| S6C4R7 | IgG L chain         | 6752703  | 8442396  | 5220648  | 4921789  | 4666851  | 10019788 |
| S6C4S0 | IgG H chain         | 43309.92 | 48420.59 | 0        | 26101.8  | 16482.65 | 42049.7  |
| S6C4S2 | IgG L chain         | 0        | 53556.49 | 0        | 0        | 42295.02 | 88548.13 |
| V9HW68 | Epididymis HEL-214  | 2.69E+08 | 3.55E+08 | 2.6E+08  | 2.82E+08 | 2.37E+08 | 4.41E+08 |
| V9HWI6 | Epididymis HEL-S-51 | 14053318 | 11030628 | 12179010 | 9199796  | 5055463  | 17628330 |
| W8QEY1 | Lactoferrin         | 17664.42 | 0        | 0        | 0        | 30068.3  | 0        |

| S7       | S8       | S9       | S10      | C1       | C2       | C3       | C4       | C5       |
|----------|----------|----------|----------|----------|----------|----------|----------|----------|
| 0        | 5168.438 | 4610.224 | 607112.6 | 5419.938 | 6275.985 | 6608.698 | 0        | 6063.45  |
| 18683.99 | 0        | 10971.53 | 13005.7  | 12872.95 | 8890.184 | 10945.48 | 10449.51 | 17355.46 |
| 56225.54 | 45980.16 | 60466.07 | 44473.56 | 50902.35 | 40276.8  | 56873.55 | 26468.65 | 60340.82 |
| 27248.25 | 14269.57 | 0        | 17545.1  | 52698.51 | 32924.27 | 26486.5  | 20133.15 | 22697.13 |
| 0        | 0        | 26063.22 | 19827.87 | 45374.79 | 0        | 0        | 0        | 54006.68 |
| 7483026  | 5606322  | 5809978  | 6986303  | 7539905  | 8172608  | 6696356  | 8188494  | 6404614  |
| 8497842  | 10535755 | 5493888  | 12194156 | 12164892 | 8260691  | 10817385 | 19024750 | 14019765 |
| 0        | 0        | 2064.058 | 0        | 5566.144 | 0        | 0        | 0        | 0        |
| 7604.271 | 7407.559 | 8076.867 | 5131.866 | 7601.805 | 9069.271 | 7520.699 | 10003.1  | 22610.92 |
| 312580.5 | 290277.5 | 196039.2 | 199236.6 | 553605.7 | 400503   | 422072.4 | 423930.2 | 411994.6 |
| 3230.777 | 2962.318 | 4555.882 | 26548.49 | 24761.02 | 5666.016 | 0        | 0        | 9982.261 |
| 25026.1  | 54578.1  | 57983.2  | 56637.66 | 88594.86 | 55801.77 | 57472.77 | 59808.63 | 41921.05 |
| 11875.85 | 0        | 0        | 0        | 11825.39 | 7409.558 | 147865.4 | 63355.95 | 109706.3 |
| 436126.9 | 458055.9 | 475454.3 | 801186.3 | 589742.9 | 599260.1 | 439909   | 479230.5 | 594760.4 |
| 34901.6  | 14100.41 | 0        | 22683.09 | 4545.37  | 0        | 0        | 19145.42 | 11441.65 |
| 1.16E+08 | 1.22E+08 | 1.06E+08 | 1.03E+08 | 1.15E+08 | 86346888 | 93207664 | 99048032 | 1.06E+08 |
| 0        | 3985.485 | 0        | 0        | 8193.789 | 0        | 0        | 10893.32 | 0        |
| 143499.9 | 30715.48 | 0        | 52344.5  | 71990.61 | 30426.48 | 0        | 52953.43 | 118233.5 |
| 0        | 3013.984 | 2147.28  | 4216.268 | 7832.993 | 23373    | 12903.87 | 16921.61 | 17432.33 |
| 3015275  | 1999821  | 6482652  | 2274068  | 5722783  | 5843595  | 3442410  | 1904309  | 5349229  |
| 8143.143 | 0        | 0        | 14374.64 | 25427.73 | 0        | 7271.706 | 6062.852 | 9355.395 |
| 163538.4 | 0        | 0        | 472463.6 | 0        | 158797.6 | 0        | 0        | 0        |
| 765943.6 | 736061.4 | 784390.4 | 953415.6 | 821649.4 | 821852.4 | 964163.6 | 994045.4 | 901107.4 |
| 45752.04 | 0        | 0        | 0        | 7973.94  | 102074.8 | 0        | 0        | 0        |
| 47249.9  | 0        | 58365.93 | 5378.569 | 4492.087 | 1966.547 | 0        | 49667.02 | 52251.83 |
| 19050.34 | 17381.71 | 22178.13 | 25266.06 | 16461.39 | 28305.99 | 29952.83 | 29276    | 18874.16 |
| 263449   | 262837.8 | 311082.5 | 220792.6 | 348249.7 | 239973.5 | 260695.6 | 305652.6 | 381560.7 |
| 34928.76 | 0        | 0        | 8019.24  | 0        | 19268.45 | 0        | 0        | 7250420  |
| 888480.9 | 767129.8 | 603002.1 | 650831.9 | 882602.1 | 674381.6 | 621596.7 | 660691.9 | 865316.5 |
| 147861.1 | 105627.2 | 60986.7  | 72835.77 | 120537.3 | 159505.3 | 131167.7 | 104756.6 | 97787.77 |
| 45196584 | 40985492 | 49861916 | 52924276 | 59969616 | 44416092 | 43011160 | 35154824 | 52860644 |
| 5754.734 | 4779.315 | 2960.476 | 2856.85  | 0        | 28436.16 | 22119.04 | 18308.54 | 7071.898 |
| 0        | 6031.516 | 0        | 0        | 5332.858 | 0        | 5395.334 | 0        | 7285.793 |
| 31495.53 | 28698.59 | 0        | 0        | 0        | 0        | 0        | 0        | 15782.7  |
| 48784.82 | 35249.23 | 0        | 0        | 43985.06 | 23861.33 | 30286.08 | 30870.11 | 23880.94 |
| 7570.207 | 8802901  | 7945.51  | 6463.492 | 21683.68 | 0        | 11067.6  | 8628.04  | 11203.87 |
| 8820.822 | 7733.729 | 12207.13 | 5288.037 | 13990.91 | 8230.573 | 6345.79  | 7993.223 | 6105.777 |
| 781061   | 17791.98 | 71063.99 | 107345.7 | 147771.7 | 116999.7 | 141568.8 | 84527.52 | 106097.6 |
| 0        | 6769.039 | 0        | 4407.908 | 0        | 7443.291 | 8165.792 | 5132.086 | 15355.85 |
| 69407.45 | 0        | 0        | 0        | 69104.73 | 43644.14 | 0        | 35942.97 | 83444.01 |
| 40691.71 | 48965.5  | 32960.46 | 87174.13 | 59683.68 | 38244.25 | 46685.66 | 62202.55 | 61693.98 |
| 14168179 | 11585552 | 10177632 | 10349397 | 11475144 | 9089983  | 8387830  | 8930022  | 11856536 |
| 0        | 13579.67 | 3761.76  | 305839.9 | 8989.427 | 6545.696 | 5363.403 | 14827.52 | 16430.03 |
| 17342.7  | 23406.06 | 37125.96 | 14997.89 | 45817.28 | 26434.21 | 6645.655 | 26535.78 | 24861.72 |
| 90856.09 | 179514   | 196188.8 | 174652.3 | 154293.5 | 167855.6 | 120197.3 | 207796.9 | 209347.4 |
| 1099188  | 931472.3 | 1101668  | 675943.8 | 1082848  | 1435549  | 1902785  | 1537966  | 1131592  |
| 11679.43 | 8345.133 | 33270.93 | 7562.492 | 11945.73 | 8685.351 | 6483.001 | 10512.86 | 9851.824 |
| 2527485  | 2038063  | 2838614  | 1794686  | 1170167  | 2116731  | 1568454  | 2137859  | 1400145  |
| 2527279  | 1349372  | 3017117  | 1259692  | 1454372  | 1701743  | 1469576  | 1941749  | 1407679  |
| 66141.85 | 70897.96 | 91912.93 | 71382.77 | 110483.4 | 69937.15 | 67725.71 | 103357.5 | 60912.89 |
| 0        | 0        | 1878.099 | 0        | 0        | 0        | 615.4468 | 1121.566 | 0        |
| 15580.25 | 21667.2  | 15047.24 | 13868.89 | 13441.63 | 20100.52 | 17712.53 | 14844.7  | 18208.36 |
| 9766.278 | 0        | 21595.92 | 17693.12 | 113005.9 | 137441.4 | 20576.68 | 0        | 0        |
| 0        | 0        | 0        | 0        | 0        | 0        | 27764.39 | 0        | 0        |
| 18816.32 | 16641.92 | 110795.1 | 15018.07 | 12285.96 | 20831.18 | 23801.98 | 17916.99 | 13968.59 |
| 5027.695 | 17067.72 | 7943.039 | 4624.074 | 15871.15 | 3654.68  | 0        | 7656.458 | 0        |
| 20759.04 | 18798.94 | 22738.06 | 28331.69 | 18312.18 | 14216.49 | 9385.113 | 9854.9   | 7253.495 |

|          |          |          |          |          |          |          |          |          |
|----------|----------|----------|----------|----------|----------|----------|----------|----------|
| 0        | 14083.25 | 4935.167 | 0        | 8212.091 | 0        | 9892.592 | 7029.107 | 9065.94  |
| 50161.19 | 43218.68 | 55640.11 | 48067.52 | 43978.47 | 51451.85 | 53464.46 | 49363.95 | 54923.12 |
| 14720.2  | 14436.83 | 28929.1  | 17795.3  | 0        | 0        | 8133.507 | 5723.669 | 12180.9  |
| 3126.429 | 3048.719 | 2589.347 | 0        | 18014.71 | 0        | 10133.66 | 0        | 5283.286 |
| 13693620 | 19223340 | 20175360 | 14962351 | 7128895  | 16891726 | 8147782  | 7677221  | 12207402 |
| 1245370  | 446928.7 | 889733.4 | 340363.7 | 523531.2 | 253123.3 | 593582   | 748517.9 | 519982.1 |
| 84877.45 | 82935.14 | 71612.56 | 45719.43 | 65966.84 | 18531.41 | 43758.45 | 49714.09 | 40068.54 |
| 2200485  | 59710.01 | 145768.7 | 62497.65 | 740742.9 | 101105.7 | 465463.8 | 388407.8 | 349085.8 |
| 261097.1 | 274535.3 | 260763.2 | 216106   | 84796.98 | 129546.3 | 170074.2 | 174491.1 | 182519.4 |
| 315349.9 | 245547.8 | 238878.8 | 245004.5 | 64114    | 163922.9 | 203691.7 | 202808.7 | 134360.3 |
| 1592168  | 1692733  | 2436297  | 1356497  | 3192312  | 4736178  | 4037417  | 2327373  | 5634289  |
| 766195.4 | 940492.9 | 1505160  | 689769.1 | 284557.3 | 594890.9 | 416546.8 | 1793208  | 591861.8 |
| 150520.5 | 14763.16 | 0        | 46505.38 | 0        | 33480.52 | 59350.75 | 34005.9  | 0        |
| 216044.3 | 278163   | 473617.8 | 184384.6 | 46842.77 | 72596.86 | 329410   | 157486.3 | 169858.3 |
| 0        | 35714.64 | 38646.59 | 62295.32 | 50238.72 | 168672.4 | 172879.9 | 125724.4 | 61729.81 |
| 1072796  | 628632.3 | 619895   | 1366900  | 377055.3 | 463443.7 | 362987   | 190797.7 | 736631.1 |
| 56177.08 | 3207524  | 2330783  | 1009182  | 1191114  | 1828361  | 1206564  | 1934429  | 1341383  |
| 59098.23 | 192446.1 | 279860.6 | 51284.66 | 60802.41 | 95605.6  | 109333.9 | 195841.8 | 122116.5 |
| 180371.7 | 105819.8 | 172004.2 | 0        | 70203.54 | 160409.3 | 85946.76 | 77527.27 | 187550.4 |
| 1135695  | 1472185  | 2413350  | 1146805  | 1043612  | 872215.3 | 3565283  | 1346387  | 1129389  |
| 1350236  | 79453.41 | 46390.19 | 0        | 0        | 8701.188 | 1971510  | 4797234  | 1915964  |
| 94492.15 | 76735.9  | 156366.8 | 23132.49 | 17377.77 | 36081.97 | 68370.58 | 33913.22 | 29817.05 |
| 386215   | 286704.1 | 365456.6 | 443732.3 | 190722.6 | 177488   | 239691.1 | 152261.1 | 348610.4 |
| 243570.9 | 0        | 504168.5 | 102165.4 | 64988.59 | 108283.7 | 380831.1 | 126658.8 | 142774   |
| 3665802  | 2654622  | 4838451  | 3717075  | 1980861  | 2144879  | 944414.2 | 2333776  | 2325232  |
| 19203.46 | 0        | 11676.49 | 0        | 0        | 0        | 17347.53 | 13520.96 | 14580.41 |
| 130530   | 99513.98 | 18530.46 | 0        | 0        | 0        | 83903.08 | 40356.63 | 50742.08 |
| 245841.8 | 182406.5 | 172463.5 | 119977.1 | 17741.38 | 115643.5 | 169064.9 | 30470.71 | 65911.63 |
| 0        | 0        | 0        | 15996.56 | 0        | 16054.87 | 13018.81 | 0        | 0        |
| 0        | 271458   | 320007.5 | 560016.6 | 141163.2 | 316579.8 | 34245.57 | 0        | 249885.5 |
| 517584.6 | 559347.7 | 500275.1 | 649128.6 | 49113.73 | 525032.5 | 354876.3 | 304899.6 | 486544.1 |
| 66987.03 | 103459.4 | 270463   | 15435.85 | 32317.35 | 38137.42 | 63067.23 | 189854.5 | 112058.5 |
| 141204   | 340279.6 | 402283.8 | 124920.4 | 142766.3 | 165090.7 | 176774.7 | 168640   | 150104.4 |
| 940744   | 845709.3 | 573036.9 | 549945.7 | 415054   | 718682.3 | 1083590  | 376498.4 | 1052717  |
| 200940   | 229536.8 | 337897.7 | 157704.9 | 0        | 134333.8 | 87839.72 | 171846.3 | 204874.9 |
| 351018.3 | 344164.1 | 293263.1 | 247726.6 | 271811.3 | 357687.8 | 279553.4 | 244971.1 | 371161.8 |
| 1263511  | 901429.6 | 1147651  | 1160044  | 977503.4 | 932048.4 | 701683.1 | 773023.1 | 884115.1 |
| 82061.16 | 181968.2 | 76956.27 | 201391.9 | 182818.9 | 206399.1 | 79901.13 | 47047.59 | 0        |
| 7291.829 | 6168.638 | 5589.869 | 164980.9 | 7702.59  | 3361.966 | 20718.29 | 0        | 6789.674 |
| 9608.155 | 6978.067 | 6847.047 | 5470.994 | 0        | 0        | 0        | 0        | 0        |
| 19670.38 | 19446.43 | 0        | 0        | 10757.12 | 0        | 8523.059 | 12290.63 | 5163.794 |
| 17884.94 | 16730.13 | 19310.68 | 5165.086 | 15883.21 | 3114.028 | 6485.791 | 4101.77  | 10424.7  |
| 0        | 0        | 0        | 0        | 28210.49 | 456840.9 | 0        | 16499.92 | 0        |
| 14965.9  | 0        | 1426744  | 1298544  | 6893.896 | 61082.27 | 0        | 0        | 0        |
| 22584.41 | 35931.36 | 29597.13 | 19138.32 | 33348.9  | 20799.28 | 24810.14 | 23418.21 | 34324.36 |
| 26744.92 | 53270.44 | 80071.91 | 56903.27 | 20658.58 | 93703.72 | 84814.63 | 91757.32 | 64159.52 |
| 12215.46 | 0        | 0        | 9421.718 | 0        | 0        | 12242.74 | 0        | 0        |
| 296608.9 | 382080   | 433625.6 | 405108.3 | 309092.9 | 318839.5 | 251550.8 | 357097.5 | 373829.1 |
| 70485.05 | 0        | 0        | 0        | 0        | 58827.1  | 0        | 0        | 52006.93 |
| 26148.74 | 21234.21 | 32108.47 | 30997.68 | 41874.9  | 34681.18 | 33892.6  | 55866.96 | 30316.65 |
| 373951.3 | 343494.5 | 221598.4 | 315455.4 | 307751.2 | 331234.9 | 261903.2 | 398302.7 | 327972.5 |
| 315742.8 | 284149.1 | 321484.3 | 918843.7 | 205986.7 | 0        | 69704.39 | 188477   | 208415.8 |
| 192880.9 | 89411.53 | 220653.2 | 187547.6 | 9130.688 | 130785.4 | 44896.14 | 21505.73 | 141664.8 |
| 1392404  | 5160936  | 1057538  | 1474481  | 133952.4 | 661810.8 | 372295.2 | 707138.8 | 494012.6 |
| 30922956 | 21926274 | 27668272 | 23092352 | 29706708 | 26260528 | 25308380 | 19118184 | 27036752 |
| 0        | 0        | 0        | 0        | 19054.83 | 51978.16 | 38830.4  | 24774.18 | 26633.23 |
| 3071903  | 4506.309 | 1607318  | 859968.1 | 4690975  | 6986.923 | 0        | 3741.365 | 0        |
| 431488.5 | 3832.692 | 82737184 | 68864896 | 7299.424 | 31025684 | 27279762 | 1457038  | 29573576 |



|          |          |          |          |          |          |          |          |          |
|----------|----------|----------|----------|----------|----------|----------|----------|----------|
| 1057179  | 3266217  | 2466978  | 320075.5 | 408014   | 533070.6 | 1691522  | 482155.2 | 970490.3 |
| 391888.6 | 624097.6 | 398020.6 | 577646.1 | 232424.1 | 486652.3 | 463287.7 | 398388.6 | 585980.2 |
| 6819237  | 1931582  | 1940524  | 1045015  | 997252.4 | 1511807  | 2331631  | 2266854  | 6731068  |
| 62327.24 | 15985.15 | 25028.75 | 67107.69 | 64143.21 | 69964.97 | 71805.91 | 45939.18 | 23308.59 |
| 88610.23 | 63508.76 | 134629.7 | 64887.1  | 32833.79 | 64501.89 | 87779.02 | 55704.11 | 63584.65 |
| 4929132  | 3434953  | 4192947  | 2334187  | 2561251  | 2006685  | 2211785  | 2758660  | 2311957  |
| 414902.3 | 371040.8 | 409926.4 | 237643.8 | 345312.4 | 0        | 179803.9 | 0        | 0        |
| 90551.83 | 211608.9 | 652714   | 102952.1 | 104741.9 | 2667.4   | 329331.1 | 287348.5 | 584902.8 |
| 1247630  | 1467119  | 1556020  | 409902.9 | 501953.9 | 806347.9 | 713255.7 | 480161.3 | 570670   |
| 24925874 | 17932014 | 24041214 | 15647562 | 7678179  | 10202331 | 10258835 | 8773249  | 7682805  |
| 70910.1  | 140023.7 | 269147.4 | 23531.08 | 12324.42 | 63455.27 | 53703.5  | 189795.9 | 123127.7 |
| 53049.7  | 56710.13 | 147515.1 | 137668.1 | 72549.23 | 72423.27 | 68229.97 | 88543.09 | 52153.79 |
| 33671.16 | 0        | 139229.6 | 78876.34 | 37939.95 | 58130.77 | 100486.6 | 56698.04 | 2817.517 |
| 0        | 6795.371 | 5967.538 | 15360.05 | 29107.89 | 7593.743 | 7591.528 | 9718.31  | 11862.03 |
| 45995.39 | 35681.25 | 27966.33 | 77965.72 | 47465.54 | 91839.7  | 49946.11 | 29303.57 | 41544.17 |
| 66052.04 | 56471.92 | 29180.1  | 28976.44 | 46256.79 | 32812.45 | 55053.28 | 34483.91 | 59504.55 |
| 8679601  | 27744948 | 7010154  | 9059592  | 3443557  | 4799634  | 5576472  | 4767606  | 4191749  |
| 324151   | 117724.9 | 299011.7 | 323264.9 | 113813.7 | 91348.41 | 90907.99 | 147181   | 164421.5 |
| 121908.7 | 412285.8 | 169385.6 | 84911.35 | 10789.53 | 67555.66 | 175884   | 149594.4 | 81818.85 |
| 81366.43 | 72583.25 | 85351.1  | 0        | 3315.603 | 70770.96 | 62655.44 | 120820.9 | 51746.88 |
| 1868218  | 2014557  | 3638972  | 2265879  | 2366744  | 2468908  | 2287598  | 2717643  | 2394099  |
| 463112.6 | 509813.6 | 541576.8 | 463864.3 | 349760.4 | 285184.2 | 238116.8 | 632226.1 | 304122   |
| 0        | 0        | 32754.69 | 24752.65 | 0        | 0        | 0        | 0        | 90960.43 |
| 13374.69 | 1410439  | 113320.3 | 535125   | 182700.9 | 924767.2 | 1395782  | 847256.8 | 924915.3 |
| 3390289  | 3595464  | 4465264  | 2362009  | 1603469  | 2040110  | 2041037  | 2073281  | 1998825  |
| 0        | 130231.9 | 71700.34 | 27385.33 | 274104.2 | 217623.2 | 92357.31 | 44726.31 | 524034   |
| 22447.25 | 17707.36 | 28521.97 | 16102.7  | 29360.37 | 33001.31 | 20353.18 | 30907.87 | 31707.67 |
| 100574.7 | 130726.9 | 113644.7 | 48016.83 | 69637.73 | 105121.6 | 90995.55 | 131229.3 | 28746.44 |
| 2884591  | 2248033  | 2848291  | 1462681  | 417938.1 | 2829514  | 1533566  | 1497387  | 1944423  |
| 41174.88 | 0        | 61722.83 | 21256.26 | 27615.72 | 49491.88 | 0        | 11372.68 | 27409.99 |
| 840146.4 | 387694.3 | 2119301  | 968003.8 | 1136678  | 1854520  | 1046782  | 457894.1 | 1392356  |
| 160634.5 | 115259.6 | 27678.14 | 72406.95 | 26330.19 | 65330.8  | 26931.67 | 68314.67 | 55830.51 |
| 33547.04 | 0        | 139229.6 | 78876.32 | 37939.96 | 58125.52 | 100647   | 56698.03 | 77322.11 |
| 0        | 0        | 0        | 92788.66 | 148147.4 | 152150.9 | 89289.41 | 0        | 128965.1 |
| 1037351  | 2061909  | 1336430  | 1407437  | 1579524  | 1513885  | 2069500  | 2796549  | 1077815  |
| 96634.28 | 117404.6 | 56808.41 | 53366.2  | 54039.58 | 48172.8  | 45679.26 | 21875.54 | 47413.29 |
| 0        | 34389.28 | 42541.15 | 0        | 0        | 0        | 0        | 0        | 10292.06 |
| 5862.678 | 47507.82 | 49125.73 | 33268.93 | 0        | 14064.94 | 51169.91 | 0        | 8003.935 |
| 799284.7 | 1012433  | 495826.9 | 613461.9 | 663194.1 | 998264.5 | 1435701  | 1107301  | 1341805  |
| 487061.9 | 1424246  | 1751781  | 298463.2 | 543618.2 | 1172904  | 1504998  | 1791140  | 361181.9 |
| 120550.3 | 180101.7 | 296861.2 | 651763.7 | 104290.5 | 316850.4 | 174351.5 | 118381.2 | 172958.1 |
| 33140.59 | 19175.5  | 31476.52 | 27859.11 | 32748.23 | 24139.34 | 12619.94 | 31473.91 | 35167.04 |
| 154758.9 | 120179.9 | 157330.1 | 144475.1 | 207166.2 | 100530.8 | 201240.5 | 122792.2 | 116858.4 |
| 335031.9 | 38301.51 | 45523.08 | 66313.01 | 77101.02 | 55758.71 | 0        | 164563.7 | 60985.18 |
| 329074.1 | 99198.09 | 280759.3 | 219508.7 | 58299.07 | 385231.4 | 113780.7 | 103602.3 | 130924.5 |
| 0        | 178953.2 | 147446.6 | 47328.07 | 36426.49 | 95060.28 | 108050.3 | 29006.37 | 23316.23 |
| 3312084  | 4562812  | 3485042  | 6052485  | 6480620  | 3492443  | 6008977  | 11702082 | 8202649  |
| 52623    | 52058.81 | 68841.98 | 45508.97 | 34911.74 | 44003.48 | 43184.96 | 23392.42 | 52747.03 |
| 90101.03 | 183292.2 | 122997.8 | 104788   | 75358.8  | 402154.8 | 71098.88 | 241471.8 | 64248.77 |
| 13932.99 | 242184.8 | 18219.2  | 12887.02 | 105284.1 | 146938.4 | 76507.45 | 273669.1 | 307529.2 |
| 174301.5 | 130944   | 129113.8 | 153023.3 | 183328.9 | 238447.3 | 257517.5 | 243305.2 | 169928.4 |
| 140601.3 | 182333.6 | 201133   | 135636.4 | 194107.2 | 131558.1 | 129339.8 | 128033.4 | 146122.8 |
| 647742.2 | 713964.3 | 594619.3 | 874314.8 | 1126208  | 882732.5 | 809905.3 | 1034871  | 927552.1 |
| 61688.16 | 37800.78 | 32403.66 | 22189.95 | 48635.04 | 60560.82 | 62765.72 | 46513.94 | 35708.3  |
| 439794.3 | 509547.9 | 469095.5 | 459167   | 630847.3 | 538680.5 | 503229.5 | 590235.5 | 570688.1 |
| 59282.34 | 28520.39 | 51879.17 | 30024.49 | 0        | 6853.751 | 61909.96 | 0        | 4401.69  |
| 217313   | 190367.2 | 577003.1 | 519513   | 0        | 563239.6 | 704038.6 | 925602.6 | 0        |
| 0        | 14996.93 | 0        | 0        | 0        | 28080.53 | 0        | 14400.46 | 0        |

|          |          |          |          |          |          |          |          |          |
|----------|----------|----------|----------|----------|----------|----------|----------|----------|
| 808752.7 | 690578.2 | 806687.1 | 1345366  | 197383.4 | 413931.9 | 700062.9 | 634890.3 | 745105.8 |
| 217311.5 | 57617.24 | 218132.2 | 122615.4 | 162077.8 | 223677.2 | 121592   | 61624.94 | 244329.4 |
| 22580044 | 21678870 | 16345270 | 10848115 | 12294697 | 10746660 | 20723374 | 16355691 | 15513949 |
| 88150.53 | 218305.6 | 103909   | 40956.08 | 49223.54 | 203225.1 | 199322.2 | 132392.3 | 88308.24 |
| 23938364 | 13675740 | 21705300 | 16329262 | 9941674  | 15310172 | 11906249 | 12450123 | 12726611 |
| 72989.94 | 93210.65 | 78588.55 | 61605.09 | 52472.82 | 100507.1 | 79646.16 | 114192.9 | 131839.2 |
| 113027.5 | 73998.38 | 110952.7 | 88323.7  | 65636.79 | 59790.18 | 36884.77 | 112256.9 | 71860.34 |
| 82136.82 | 181527.3 | 167550.2 | 132612   | 27480.41 | 97697.19 | 54198.73 | 50546.45 | 63291    |
| 6618542  | 6561755  | 6346815  | 1336305  | 2014944  | 2858891  | 2793306  | 3132710  | 1093246  |
| 7880675  | 11291925 | 18712816 | 9088400  | 6730545  | 10130114 | 13467226 | 8079230  | 9849422  |
| 133361   | 242113.7 | 281135.3 | 290944.5 | 82585.6  | 201006   | 254012.7 | 322624.2 | 269690.4 |
| 32228.39 | 31560.12 | 54324.84 | 50250.28 | 49710.56 | 20891.95 | 20346.93 | 22577.94 | 76480.06 |
| 4756809  | 1633609  | 1380622  | 810797.5 | 1635529  | 838607.8 | 1635095  | 1172839  | 2337773  |
| 384265.3 | 198676.4 | 232878.1 | 164038.3 | 156831.5 | 117632   | 124272.5 | 314377.1 | 75012.51 |
| 1738844  | 203402.6 | 1707289  | 1839862  | 153250.5 | 749657   | 242800.1 | 104386.9 | 115811   |
| 35540500 | 38384556 | 70575024 | 37085732 | 11255083 | 14946918 | 448584.1 | 19201532 | 18215534 |
| 0        | 24531.64 | 29213.93 | 17994.06 | 44206.5  | 0        | 8800.663 | 14280.03 | 14348.94 |
| 1456765  | 1516225  | 1927293  | 694147.3 | 218001.3 | 651926.4 | 579573.1 | 459513.8 | 514819.4 |
| 3104891  | 2812645  | 2636425  | 2759859  | 2063277  | 2816694  | 2167226  | 2706350  | 2894479  |
| 55950.61 | 75983.48 | 94567.09 | 154144   | 37118.21 | 48747.59 | 102543.7 | 87036.73 | 44344.45 |
| 285942.5 | 429651.4 | 457304.8 | 274054.6 | 149565.1 | 234797.9 | 187612.9 | 292927.5 | 286290   |
| 6998.947 | 592553.6 | 70280.06 | 90140.82 | 26678.22 | 100367.5 | 56487.63 | 31835.39 | 157074.5 |
| 2394233  | 1393232  | 1530254  | 2268646  | 1358642  | 1933428  | 1155109  | 2022660  | 2333602  |
| 934295.8 | 887378.6 | 653879.6 | 368885.5 | 270064.5 | 538433.1 | 571130.2 | 443463.3 | 508571.5 |
| 341313.2 | 471506.1 | 510314.5 | 197139.6 | 144709   | 182449.3 | 155947.4 | 394728.5 | 299808.3 |
| 629443   | 211601.1 | 251984.8 | 145471.8 | 182601.1 | 222311.4 | 162043.9 | 186897.2 | 149193.2 |
| 208984.9 | 0        | 0        | 186407.4 | 0        | 0        | 30502.13 | 170539.3 | 0        |
| 1419886  | 2458996  | 6561398  | 2131318  | 9579.491 | 1661180  | 3740627  | 2619632  | 3482152  |
| 2811932  | 4600766  | 5501623  | 3134456  | 911199.2 | 3220916  | 2775572  | 10641692 | 4165187  |
| 3366990  | 5406506  | 6767177  | 2997065  | 1485243  | 1911678  | 2184583  | 962864.8 | 3541565  |
| 124960.9 | 183554.5 | 480018.9 | 443988.6 | 477895.3 | 35228.05 | 95620.99 | 46208.98 | 628424.8 |
| 164743.3 | 247413.2 | 262941.2 | 249265.9 | 97908.39 | 128442.4 | 224365   | 167904.5 | 162910.5 |
| 81927.63 | 58756.04 | 70706.88 | 106164.3 | 94273.91 | 165046.6 | 133143.6 | 71759.92 | 67609.05 |
| 660897   | 20988.25 | 358315.3 | 0        | 85633.17 | 144348.8 | 129039   | 85309.7  | 197347.6 |
| 435549.5 | 478309.9 | 633090.9 | 508108.2 | 419622.4 | 448549.3 | 317275.1 | 427290   | 395642.3 |
| 716145.4 | 865326.4 | 849805   | 479195.1 | 626026.6 | 547299.1 | 571430.7 | 590130.7 | 579528.4 |
| 7056732  | 5192113  | 2775645  | 2785322  | 2704231  | 2065953  | 3023899  | 1381265  | 1763739  |
| 1343405  | 893193.6 | 1578226  | 718627.4 | 355326.6 | 643597.3 | 603416.1 | 744603.9 | 1044186  |
| 32302.7  | 24384.44 | 26678.51 | 23949.76 | 33511.29 | 21003.29 | 34771.1  | 32679.42 | 26678.19 |
| 465232.9 | 651022.2 | 526735.4 | 331318.2 | 563661.1 | 611910.8 | 416910.5 | 326361.1 | 443877.1 |
| 13137.04 | 0        | 18620.21 | 17722.13 | 0        | 3854.621 | 43802.64 | 15681.14 | 21364.64 |
| 14525.22 | 21030.08 | 24163.86 | 21058.88 | 15087.79 | 6344.812 | 0        | 8790.467 | 5832.732 |
| 0        | 10821.97 | 0        | 0        | 23904.88 | 15152.02 | 11451.08 | 19129.9  | 16721.24 |
| 6816904  | 5751984  | 4368605  | 6238482  | 7780011  | 6993990  | 6199674  | 5383356  | 6077780  |
| 226813.8 | 287918.4 | 253534   | 255619.8 | 250031   | 275442.8 | 252793.7 | 269708.3 | 278424.1 |
| 0        | 2587.7   | 4696.814 | 5477.324 | 0        | 0        | 4389.75  | 4671.276 | 0        |
| 88636.06 | 87677.23 | 131720   | 65202.03 | 94278.14 | 80150.44 | 77112.5  | 73938.07 | 77730.46 |
| 1479516  | 1004729  | 1237085  | 1357467  | 1965211  | 1274197  | 1591343  | 1379235  | 1328286  |
| 13337.08 | 10318.47 | 0        | 0        | 18333.05 | 9964.316 | 0        | 18766.33 | 6600.051 |
| 88328.68 | 71218.52 | 60505.83 | 47161.44 | 58113.12 | 44766.29 | 5128.298 | 19239.43 | 427962.4 |
| 289884.5 | 481946.2 | 369126.5 | 536818.1 | 598685.3 | 393165.5 | 606604.8 | 421870.4 | 432177   |
| 9652536  | 11057163 | 8983934  | 4609653  | 3962781  | 4549490  | 7084368  | 4459274  | 6606654  |
| 46069.79 | 106370.6 | 52469.77 | 75562.17 | 84462.47 | 80480.47 | 60373.89 | 46927.27 | 88632.61 |
| 33943.39 | 0        | 75254.32 | 43034.91 | 66548.23 | 0        | 0        | 0        | 245423.7 |
| 124263.4 | 0        | 124210.1 | 242706.4 | 276095.8 | 253101.1 | 339758.3 | 49643.94 | 57771.77 |
| 8158.157 | 0        | 0        | 7653.719 | 0        | 6678.612 | 2681.182 | 0        | 3862.067 |
| 4696761  | 3819563  | 3208625  | 3888139  | 4817094  | 5215810  | 3761626  | 4814874  | 4643046  |
| 18391.29 | 16195.73 | 5548.672 | 3410.674 | 26254.31 | 11500.15 | 21847.89 | 20896.45 | 17808.64 |

|          |          |          |          |          |          |          |          |          |
|----------|----------|----------|----------|----------|----------|----------|----------|----------|
| 2913221  | 2224534  | 0        | 5142664  | 6476.469 | 0        | 4932492  | 1587223  | 2846937  |
| 331235.4 | 1876134  | 263748   | 459608.7 | 108626.3 | 126153.6 | 200695.8 | 0        | 151514.1 |
| 1091632  | 1883447  | 499792.4 | 824573.9 | 893120.8 | 932982.1 | 836381.6 | 1083683  | 826548.6 |
| 431918.3 | 175692.8 | 19898624 | 10691531 | 212591.6 | 1697225  | 210085.1 | 16505610 | 184114.1 |
| 122042   | 6418608  | 278723.1 | 145540.5 | 151821.2 | 143253.8 | 123019.5 | 42991.76 | 221728.2 |
| 236901.3 | 376661.7 | 724517.5 | 191544   | 116818.4 | 92522.45 | 140298.5 | 403039.2 | 258552.5 |
| 3607452  | 398651.9 | 589372.7 | 821745.6 | 570631.8 | 763132.8 | 588195.6 | 1999496  | 721302   |
| 164707.9 | 335720.1 | 11535.09 | 95169.67 | 67943.27 | 346388.4 | 36395.84 | 119502.6 | 280811.4 |
| 350126.2 | 367482.6 | 394198.3 | 359625.4 | 237515.4 | 516428.1 | 606666.3 | 371755.6 | 568243.9 |
| 184838.1 | 171995.5 | 327251.6 | 147585.5 | 130854.8 | 138990.2 | 275486.1 | 119685.2 | 182504.3 |
| 14307.57 | 65366.63 | 57528.91 | 76756.52 | 35112.11 | 60694.3  | 35936.27 | 198726.5 | 76315.65 |
| 1785470  | 2162467  | 2415570  | 1059481  | 781770.7 | 546950.8 | 3024846  | 1018032  | 947663.5 |
| 144510.3 | 94447.29 | 325864.6 | 82034.66 | 79927.39 | 108798.2 | 98836.24 | 44001.86 | 143124.3 |
| 84934.15 | 98366.69 | 85463.16 | 87206.98 | 713668.6 | 906923.4 | 323116.9 | 411459.4 | 514785.3 |
| 0        | 48010.02 | 24017.21 | 30856.61 | 0        | 0        | 0        | 0        | 49658.27 |
| 26482.12 | 29320.19 | 0        | 26464.98 | 18685.12 | 14753.24 | 0        | 15425.2  | 43718.77 |
| 45013.43 | 252325.7 | 34496.25 | 29612.15 | 63171.14 | 63621.41 | 78902.31 | 86168.11 | 59046.61 |
| 18200.32 | 13558.57 | 13596.62 | 12664.29 | 24851.34 | 21841.02 | 20654.01 | 15235.23 | 14488.32 |
| 7152.917 | 10898.22 | 0        | 0        | 40485.7  | 84407.34 | 23315.46 | 99095.23 | 0        |
| 0        | 0        | 0        | 0        | 0        | 0        | 12512.65 | 11700.19 | 0        |
| 6952.431 | 9464.373 | 13112.42 | 12300.41 | 21032.81 | 16112.16 | 12447.52 | 11963.61 | 21333.23 |
| 508226   | 569967.6 | 525001.9 | 454016.6 | 657851.3 | 494818   | 484323   | 527538.3 | 476855.5 |
| 85856.56 | 65870.83 | 58725.48 | 20595.99 | 33742.45 | 26787.47 | 24492.16 | 18821.01 | 31323.43 |
| 537397.8 | 524104.8 | 1342267  | 521170.9 | 298732.3 | 405218.2 | 568561.1 | 512912.9 | 1135795  |
| 1486042  | 753295.6 | 902987.1 | 748132.4 | 1258237  | 508416.9 | 2447261  | 661801.2 | 979540.7 |
| 751850.2 | 762200.8 | 860166.1 | 511966   | 424705.2 | 217279.4 | 125205.5 | 98350.15 | 200129.9 |
| 283921.6 | 786086.5 | 69771.3  | 169013.6 | 76047.41 | 487077.7 | 466307.8 | 739515   | 72321.52 |
| 602905.6 | 501074.4 | 869522.4 | 386721.1 | 501035   | 647926   | 733661.8 | 642884.1 | 1393044  |
| 704255   | 737857.3 | 524509.9 | 517482.4 | 353660.6 | 385027.3 | 521980.8 | 445650.2 | 300160.5 |
| 260432   | 39558.45 | 237193.6 | 384654   | 0        | 9698.982 | 19892.77 | 58840.66 | 30289.72 |
| 91087.23 | 143204.7 | 359696.1 | 91239.83 | 41190.8  | 30928.71 | 32494.71 | 18653.27 | 62166.92 |
| 2486664  | 2983943  | 3069617  | 3922741  | 2306993  | 1627765  | 1069210  | 1740232  | 3489203  |
| 1227065  | 0        | 1388547  | 843564.4 | 487641.6 | 0        | 0        | 163820.5 | 484303.3 |
| 83194.77 | 81069.16 | 216326.3 | 138309.8 | 0        | 46198.96 | 83700.11 | 0        | 125707.2 |
| 318322.1 | 1194410  | 1060389  | 548722.4 | 194317.8 | 306607.6 | 293453.5 | 298182.2 | 152051.2 |
| 1062894  | 2476492  | 1202671  | 278637.1 | 409674.7 | 77287.27 | 145788.8 | 124402.7 | 153509.9 |
| 821692.8 | 2057095  | 2208850  | 1005617  | 519989.1 | 399421.6 | 676066   | 1037783  | 815435.9 |
| 366064.8 | 1230582  | 895414.3 | 371021.7 | 663564.6 | 259872   | 213725.6 | 220541.3 | 245167.7 |
| 320210.7 | 518182.9 | 177758.9 | 547057.3 | 201810   | 265039.7 | 185534.1 | 293773.4 | 203961.6 |
| 130334.9 | 493585.9 | 326681.3 | 171683.6 | 146754.2 | 201333.1 | 146586   | 979107.5 | 593402.2 |
| 76171.05 | 70912.87 | 62033.46 | 44805.02 | 76927.63 | 64342.14 | 54716.34 | 50868.25 | 57159.38 |
| 2650.947 | 1507.302 | 61859.41 | 48401.06 | 0        | 22303.27 | 12223.3  | 122009.5 | 149224.8 |
| 16048.6  | 0        | 0        | 21752.66 | 21595.86 | 16218.09 | 28839.98 | 34298.37 | 27842.63 |
| 46754440 | 16408049 | 65215400 | 33900460 | 9028015  | 25631524 | 15283871 | 8233777  | 12595329 |
| 2.4E+08  | 1.07E+08 | 1.22E+08 | 1.15E+08 | 1.09E+08 | 75374184 | 45293124 | 43314272 | 89066624 |
| 0        | 10582.87 | 16843.38 | 16014.11 | 4256.776 | 0        | 6207.894 | 0        | 5227.444 |
| 8876.055 | 7693.019 | 7897.334 | 8921.667 | 16960.4  | 9268.731 | 8346.285 | 12914.21 | 12006.14 |
| 3704.271 | 2984.34  | 5781.677 | 0        | 0        | 6624.503 | 0        | 0        | 0        |
| 162656.7 | 0        | 16440.02 | 8219.765 | 0        | 49472.65 | 0        | 25750.62 | 33003.95 |
| 16648.85 | 26847.23 | 21747.1  | 28034.15 | 6431.646 | 2311.482 | 5774.92  | 10950.6  | 28509.23 |
| 22725.24 | 0        | 15402.71 | 13137.59 | 8849.885 | 45539.47 | 11217.49 | 38828.5  | 0        |
| 70432.51 | 55973.54 | 36534.94 | 87682.22 | 0        | 51269.49 | 59151.44 | 160819.6 | 47873.76 |
| 0        | 1341.816 | 1442.201 | 2069.915 | 6908.702 | 0        | 3382.852 | 2588.568 | 1898.805 |
| 46273.7  | 88123.36 | 48360.29 | 0        | 0        | 0        | 0        | 37854.37 | 0        |
| 46414.18 | 37366.66 | 74558.12 | 0        | 36171.92 | 13235.23 | 158821.5 | 30373.58 | 146083.4 |
| 105833.3 | 134275.2 | 145340.2 | 89593.39 | 84699.88 | 91200.83 | 70567.98 | 84911.2  | 110498.1 |
| 23740.58 | 0        | 0        | 0        | 0        | 0        | 0        | 15446.21 | 17193.94 |
| 297733.9 | 246357   | 201917.2 | 301507   | 300256.2 | 280526.9 | 171261.5 | 234822.8 | 245796.4 |

|          |          |          |          |          |          |          |          |          |
|----------|----------|----------|----------|----------|----------|----------|----------|----------|
| 316460.5 | 159657.3 | 164176.7 | 158175.9 | 85964.48 | 64981.42 | 3466.001 | 60692.41 | 51240.08 |
| 42799.3  | 12478.76 | 139042.9 | 46488.18 | 0        | 207128.8 | 7094.199 | 0        | 78046.31 |
| 14234116 | 13415315 | 11304146 | 5097855  | 3686385  | 7461498  | 7518342  | 7629988  | 9574818  |
| 380881.6 | 317615.8 | 574901.1 | 113900.1 | 229241.3 | 359286.6 | 178330.5 | 356593.1 | 95365.36 |
| 650619.4 | 2308894  | 3497557  | 433131.9 | 687109.8 | 1543167  | 2453406  | 2787297  | 375106.2 |
| 156168.2 | 73273.45 | 102140.8 | 67291.77 | 119945.3 | 124813.9 | 97717.49 | 79616.78 | 248017.5 |
| 265018.6 | 232804.3 | 174851.6 | 152929.9 | 107802.1 | 69176.52 | 114809.8 | 70261.59 | 107996.7 |
| 0        | 0        | 7900.053 | 8850.565 | 0        | 12351.03 | 10719.39 | 7989.177 | 0        |
| 230414.6 | 405668.4 | 349610.3 | 255815   | 279163.6 | 304047.6 | 212272.6 | 158076.9 | 205883.7 |
| 2941901  | 1831233  | 2884139  | 341491.5 | 1146557  | 868737.3 | 812130.4 | 684284.6 | 813493.6 |
| 279392.1 | 544594.3 | 285237.5 | 151985.1 | 217033.1 | 149206.7 | 137596.2 | 63398.54 | 203409.3 |
| 127232.9 | 76384.41 | 187806   | 86008.02 | 54139.32 | 63356.13 | 43010.61 | 38900.73 | 123194.8 |
| 119963.7 | 44943.7  | 107853.4 | 56567.09 | 60661.69 | 84023.75 | 25095.45 | 0        | 60525.56 |
| 56807.52 | 10490443 | 0        | 124262.6 | 83545.38 | 4750965  | 24891.98 | 135622.8 | 6799468  |
| 205700.9 | 103556.9 | 151732.1 | 164251.6 | 30290.94 | 74575.41 | 81300.28 | 93687.88 | 73571.03 |
| 99233.38 | 65359.86 | 110394.4 | 58128.74 | 16596.85 | 78739.81 | 36128.46 | 105214   | 124170.8 |
| 77561.87 | 0        | 211844.5 | 67721.05 | 63229.36 | 96268.95 | 109168.8 | 156166.3 | 279360   |
| 3613152  | 2140441  | 3063385  | 2587967  | 1275459  | 2532849  | 1480219  | 2270966  | 1348465  |
| 96700.02 | 280256.7 | 127505.5 | 116073.1 | 222277.3 | 215433.1 | 228716.2 | 170895.7 | 136737.3 |
| 18523.03 | 35560.92 | 15625.06 | 38419.09 | 0        | 0        | 20299.78 | 0        | 18803.17 |
| 55054.69 | 88704.7  | 377812   | 44113.77 | 31732.07 | 39548.81 | 47890.63 | 210777   | 36680.95 |
| 12044.9  | 5139.842 | 0        | 0        | 0        | 11388.32 | 14583.57 | 12685.78 | 47284.06 |
| 434649.7 | 303062.1 | 381116.8 | 199197.7 | 167643.3 | 160230.2 | 172282.9 | 110718.1 | 294087.5 |
| 1209398  | 880212.6 | 982278.3 | 1119511  | 583655.3 | 305663   | 227369.1 | 225120.2 | 887044.2 |
| 340313.5 | 369237.9 | 500303   | 392978.9 | 331788.6 | 366460.3 | 229537.1 | 329833.3 | 165214.5 |
| 230558.1 | 1009686  | 1193044  | 6177.186 | 0        | 0        | 293119.3 | 0        | 56184.7  |
| 4886854  | 4309319  | 5759643  | 2862822  | 2766786  | 2344249  | 3256828  | 2112366  | 3411508  |
| 211994.8 | 322540.3 | 297812   | 274456.1 | 153778.7 | 184301   | 124897.8 | 128251.8 | 290425.5 |
| 671757.3 | 860226.6 | 392932.5 | 265215.9 | 189040.2 | 404381.6 | 441370.2 | 247029.8 | 309367.9 |
| 3397863  | 5776548  | 66856.98 | 1777692  | 73479.48 | 1585260  | 2687084  | 155064.6 | 221328.5 |
| 1497364  | 2354006  | 2026434  | 1035838  | 888645.5 | 1038304  | 1076766  | 1412454  | 1164086  |
| 133386.9 | 257007.3 | 79511.06 | 105077.4 | 58074.54 | 89017.59 | 68901.11 | 69625.84 | 68160.67 |
| 97590.81 | 128644.4 | 104332   | 64238.55 | 73025.91 | 82626.61 | 44313.2  | 39418.05 | 51248.93 |
| 0        | 2073.934 | 30067.81 | 15749.55 | 15754.36 | 0        | 0        | 6997.317 | 17707.25 |
| 238192.7 | 146928.3 | 288853.9 | 265446.8 | 243511   | 243454.6 | 308257.1 | 175691.2 | 164910.7 |
| 533767.8 | 846205.9 | 446430.3 | 425258.7 | 111042.7 | 271219.6 | 207196   | 344054.1 | 231910.7 |
| 149078.7 | 80791.35 | 127490.3 | 0        | 0        | 70772.14 | 0        | 209478.2 | 0        |
| 279480.5 | 173447.1 | 0        | 0        | 0        | 0        | 88017.14 | 103109.6 | 86723.99 |
| 195536.8 | 115276.5 | 143337.3 | 225911.8 | 60312.91 | 71665.12 | 106967.7 | 38388.84 | 310177.8 |
| 108242.1 | 97258.8  | 79635.02 | 40035.39 | 41352.7  | 93330.66 | 44209.77 | 48652.11 | 31838.98 |
| 1800905  | 2016246  | 1773275  | 1224404  | 1276231  | 2063127  | 1104083  | 528189.8 | 1758044  |
| 633981.6 | 0        | 217122.2 | 227395.9 | 458228.2 | 247115.7 | 85353.95 | 0        | 180138.8 |
| 113052.4 | 140177.4 | 143039   | 106543.8 | 20525.28 | 321810.1 | 78096.66 | 634130.7 | 158476   |
| 9680.134 | 26560.52 | 28757.02 | 16152.98 | 0        | 9885.386 | 17136.2  | 38056.58 | 14225.96 |
| 158629.7 | 94850.2  | 1363154  | 98171.3  | 73235.58 | 873158.3 | 105122.4 | 1081445  | 82631.49 |
| 14072.13 | 88052.42 | 68031.11 | 16116.57 | 0        | 0        | 57853.84 | 64344.97 | 59611.9  |
| 1121969  | 571432.8 | 907749.2 | 528785.6 | 754202.4 | 825332.4 | 739508.8 | 697960.4 | 709624.3 |
| 945506.8 | 809438.6 | 893980   | 531633.7 | 803378.6 | 441294.4 | 0        | 457519.4 | 0        |
| 14303722 | 15781111 | 18770726 | 8672365  | 8536944  | 14176009 | 13630161 | 13639967 | 11843805 |
| 288842.8 | 319793.1 | 373844.8 | 334020.4 | 274199   | 298619   | 217416.2 | 221307   | 466080.1 |
| 561491.8 | 607702.8 | 616774.4 | 1021072  | 519324.7 | 1033927  | 705035   | 857081.1 | 583230.6 |
| 576030.3 | 2568498  | 2014503  | 567878.8 | 425901.8 | 1561198  | 626510.8 | 692113.6 | 563861.7 |
| 1282384  | 658586.3 | 863938.2 | 409812.4 | 64127.75 | 80988.59 | 77859.55 | 88006.85 | 253236.6 |
| 180577.9 | 119684   | 87364.98 | 55283.25 | 46693.48 | 59961.59 | 0        | 0        | 397461.1 |
| 61758.42 | 696396.6 | 70375.17 | 36642.86 | 103375.5 | 143649.3 | 95571.77 | 130188.4 | 171437.1 |
| 187115   | 121932   | 172269.2 | 221506.5 | 133501.3 | 421879.1 | 253326.6 | 262839.1 | 481956   |
| 206662.7 | 178199.7 | 0        | 233451.8 | 93530.8  | 354077.5 | 227796.5 | 0        | 330522.3 |
| 1069371  | 784033.7 | 530932.1 | 354342.1 | 550413.9 | 560346.4 | 1087503  | 442152.8 | 416560.1 |

|          |          |          |          |          |          |          |          |          |
|----------|----------|----------|----------|----------|----------|----------|----------|----------|
| 977278.4 | 907283.2 | 1867112  | 829863.3 | 369516.7 | 745536.8 | 624461.1 | 727603.4 | 450862.1 |
| 162700.3 | 144823.3 | 133216.1 | 125981.6 | 289181.8 | 5581.349 | 331936.2 | 87858.25 | 84318.08 |
| 42318.51 | 0        | 62400.92 | 0        | 50211.47 | 97260.2  | 110459   | 103376.9 | 51651.14 |
| 4090326  | 2990099  | 3976286  | 1926585  | 2236824  | 3986028  | 2161925  | 302519.1 | 2728898  |
| 3104.819 | 31555.82 | 16672.04 | 10015.11 | 0        | 12732.86 | 51952.62 | 29653.92 | 66228.24 |
| 0        | 230453.7 | 206964.7 | 0        | 0        | 83235.47 | 0        | 0        | 79153.7  |
| 68495.13 | 82894.9  | 93752.09 | 49743.84 | 22249.9  | 35946.05 | 40771.82 | 58417.26 | 41539.41 |
| 69582.95 | 0        | 52306.07 | 0        | 49083.16 | 42215.27 | 0        | 0        | 0        |
| 3080754  | 2753721  | 1711633  | 1662697  | 692257.3 | 862044.2 | 659339.3 | 531789.5 | 1627501  |
| 171543.5 | 88313.65 | 317130.1 | 23194.49 | 0        | 0        | 331664.2 | 34404.79 | 296687.7 |
| 40562.34 | 51583.04 | 49399.57 | 10129.28 | 23517.79 | 37916.55 | 35641.92 | 32033.16 | 35874.08 |
| 9488.135 | 79409.31 | 36266.82 | 7099.349 | 32283.14 | 79232.35 | 0        | 0        | 38303.77 |
| 2410961  | 1384469  | 1529771  | 1762283  | 1018565  | 1058634  | 1164170  | 681771.1 | 1406453  |
| 41617.61 | 25187.11 | 21380.84 | 17402.73 | 35930.77 | 0        | 27857.94 | 0        | 34636.71 |
| 77140.94 | 123424   | 38711.86 | 45485.53 | 22246.24 | 80374.88 | 72159.75 | 28961.02 | 64223    |
| 74834.27 | 5608713  | 45954.95 | 21922.57 | 31938.85 | 0        | 0        | 0        | 0        |
| 1012382  | 164453   | 199902.3 | 1656458  | 1102248  | 650544.7 | 725769.9 | 992387   | 1123156  |
| 0        | 134934.8 | 314678.3 | 154027   | 281135.9 | 173034.7 | 411778.1 | 182051.8 | 144651.2 |
| 521737.6 | 4752665  | 2519364  | 2527899  | 2479772  | 1883256  | 2771242  | 1256316  | 3191142  |
| 71177.3  | 65804.09 | 628139.3 | 440911.9 | 62766.58 | 68653.03 | 93285.55 | 69621.3  | 47423.38 |
| 77564.16 | 30127.48 | 28794.25 | 0        | 84020.25 | 78780.19 | 115244.4 | 0        | 0        |
| 16390.18 | 16860.35 | 0        | 0        | 13275.43 | 18243.66 | 29749.44 | 12327.83 | 26579.5  |
| 51849.53 | 0        | 78820.22 | 52484.57 | 36373.83 | 84396.15 | 71845.98 | 69980.38 | 59772.48 |
| 355047.7 | 60584.09 | 288656   | 0        | 0        | 0        | 0        | 0        | 49037.49 |
| 21308.8  | 26681.7  | 18248.49 | 0        | 0        | 0        | 55259.38 | 0        | 24126.22 |
| 47198.05 | 140849.9 | 136395.2 | 88567.86 | 80220.95 | 0        | 67277.2  | 64965.14 | 0        |
| 28232.34 | 71830.03 | 176671.3 | 77895.47 | 117409.4 | 181475.9 | 124865.5 | 80885.09 | 103896.1 |
| 104538.5 | 216903.1 | 247130.5 | 24366.15 | 29324.61 | 78267.33 | 20676.14 | 11959.33 | 21845.76 |
| 60322.96 | 105957.2 | 188206   | 42810.11 | 68865.11 | 120255   | 80325.48 | 94921.89 | 28250.87 |
| 104353.7 | 92383.59 | 67217.65 | 72687.72 | 73573.2  | 109415.3 | 63154.76 | 59599.56 | 78131.02 |
| 280686.4 | 574167.4 | 649086.7 | 480285.5 | 161788.4 | 932793   | 537641.8 | 384295.5 | 292048.5 |
| 105221.3 | 64590.73 | 70722.23 | 88864.24 | 59704.64 | 57085.53 | 133738.1 | 10290.49 | 109282.6 |
| 16723.2  | 38211.36 | 38909.73 | 33761.56 | 54272.84 | 9141.688 | 0        | 0        | 12725.07 |
| 330174   | 549099.5 | 615305.8 | 954533.2 | 173447.3 | 116152.1 | 118891.9 | 275602.6 | 230373   |
| 20447.3  | 29023.35 | 39033.41 | 63928.39 | 11154.09 | 13106.12 | 12547.3  | 5601.125 | 3184.361 |
| 51390.06 | 88219.95 | 132795   | 94172.05 | 46811.05 | 34877.92 | 79673.13 | 42040.92 | 58026.77 |
| 29460.14 | 13934.26 | 13002.63 | 28768.25 | 19545.5  | 15327.58 | 36938.19 | 38640.25 | 34676.5  |
| 66775.97 | 12989.03 | 25623.64 | 88380.31 | 19066.36 | 43598.62 | 24769.55 | 33620.74 | 75656.62 |
| 219211.2 | 397326.7 | 308790.8 | 177754.4 | 61913    | 133450.3 | 296242.6 | 253454.9 | 141199.2 |
| 497769.9 | 323409.1 | 328409.3 | 400458.6 | 134680.8 | 264192   | 360440.9 | 121339.5 | 188655.7 |
| 0        | 25677.53 | 31344.18 | 0        | 6294.927 | 2922.997 | 21765.03 | 6318.361 | 26207.01 |
| 754296.4 | 721477.9 | 332032.8 | 421301.2 | 216133.6 | 520106.8 | 96404.73 | 300026.2 | 374641.9 |
| 132919.1 | 0        | 106267.2 | 235701.1 | 168608.4 | 105552.7 | 194655.8 | 284528.3 | 254810.5 |
| 37434.92 | 10867.86 | 31966.29 | 26193.36 | 0        | 28567.99 | 0        | 12157.08 | 8936.546 |
| 559090.8 | 396289.8 | 423341.3 | 147232.7 | 261534.9 | 227278   | 295650.7 | 180645.5 | 352899.9 |
| 222015.2 | 10051186 | 8575694  | 4074742  | 3758650  | 4380750  | 4483934  | 5984205  | 4714088  |
| 304958.2 | 323356.2 | 273251.8 | 231512.8 | 843768.1 | 443492.8 | 248960.9 | 226212.9 | 319399.6 |
| 52700.83 | 50879.07 | 98516.77 | 20754.59 | 11191.74 | 13296.95 | 16314.51 | 20151.11 | 77715.39 |
| 155594.7 | 53062.35 | 230609.6 | 78960.05 | 248254.7 | 150175.6 | 63815.91 | 33971.45 | 74094.84 |
| 1209398  | 880212.5 | 1771825  | 1119511  | 1130951  | 1047295  | 433690.3 | 443281.3 | 887044.2 |
| 171660.7 | 74964.2  | 31881.4  | 54096.89 | 0        | 78739.84 | 38364.95 | 109573.8 | 124030.4 |
| 366970.2 | 384769   | 346727.3 | 235974.1 | 384416.2 | 283758.7 | 0        | 222038.8 | 481807.9 |
| 524397.4 | 306437.1 | 370592.9 | 295395.8 | 152808.2 | 152367.4 | 155957   | 159886.9 | 241747   |
| 1111917  | 857800.8 | 777330.8 | 839319.6 | 1136814  | 1170813  | 869033   | 1157520  | 1175072  |
| 0        | 0        | 9627.104 | 0        | 0        | 0        | 0        | 0        | 0        |
| 28360.17 | 2373.514 | 19000.82 | 0        | 63798.34 | 7770.853 | 3664.032 | 5261.893 | 5925.484 |
| 0        | 0        | 101807.8 | 0        | 0        | 288026.8 | 287795.2 | 0        | 0        |
| 2096841  | 2049321  | 2325834  | 2298512  | 3158608  | 2584730  | 2122614  | 2972009  | 2530638  |

|          |          |          |          |          |          |          |          |          |
|----------|----------|----------|----------|----------|----------|----------|----------|----------|
| 18379.38 | 11511.06 | 11910.91 | 6271.925 | 9671.507 | 5159.131 | 14872.09 | 0        | 4213.326 |
| 2255436  | 2292836  | 3514804  | 2117223  | 1136663  | 6169296  | 3754828  | 5066529  | 4682839  |
| 29627.91 | 17300.84 | 10337.57 | 22374.98 | 9342.459 | 46453.47 | 11783.77 | 4710.043 | 8122.733 |
| 46494.07 | 29912.54 | 0        | 49958.55 | 63681.36 | 37790.73 | 0        | 42157.14 | 0        |
| 0        | 0        | 0        | 0        | 23620.11 | 0        | 0        | 26982.24 | 4248.884 |
| 724567.9 | 914073.1 | 788412.2 | 554704.2 | 968906.8 | 939869.6 | 924377   | 1231503  | 898498.1 |
| 7507090  | 9987719  | 10667756 | 13400357 | 16133565 | 12702379 | 11213861 | 12253726 | 12525244 |
| 7919150  | 7422241  | 5570073  | 7201948  | 8116552  | 9168403  | 6851525  | 9487411  | 7832657  |
| 0        | 8308.119 | 0        | 0        | 0        | 0        | 0        | 0        | 0        |
| 6152.289 | 8164.286 | 8006.867 | 8504.238 | 0        | 4777.743 | 8784.985 | 16733.35 | 8132.029 |
| 0        | 0        | 207649.4 | 7912.226 | 13032.24 | 0        | 0        | 0        | 8479.881 |
| 6395.047 | 3715.972 | 6677.627 | 0        | 5248.194 | 6968.208 | 0        | 4420.507 | 5660.334 |
| 24020.86 | 12428.87 | 12312.12 | 0        | 14287.33 | 0        | 0        | 3828.541 | 0        |
| 111536.4 | 163496.9 | 30298.65 | 60033.63 | 82649.74 | 115402.9 | 98181.56 | 50149.64 | 108689.5 |
| 172151.1 | 125695.8 | 136664.4 | 79985.63 | 451138.9 | 165201.4 | 609568.4 | 213266.7 | 157637.4 |
| 1195381  | 1049468  | 1310637  | 1905865  | 1659265  | 1355603  | 1556351  | 2316206  | 1646249  |
| 13024.61 | 0        | 29809.21 | 0        | 0        | 46734.27 | 0        | 0        | 0        |
| 313802.2 | 312462.8 | 385741.7 | 5212.973 | 197372.5 | 90994.17 | 244236.1 | 177273.6 | 268653.9 |
| 70271.54 | 13108.44 | 16915.04 | 19942.51 | 16075.65 | 20686.73 | 10285.26 | 39608.49 | 14087.1  |
| 519753.8 | 358396.9 | 614790.9 | 615251.4 | 724910.3 | 441937.8 | 404329.8 | 420344.3 | 656413   |
| 236280.6 | 247652.5 | 261340.7 | 146343.3 | 317380.1 | 191096.6 | 198791.2 | 307371.3 | 157367   |
| 554996.5 | 435275.6 | 343801.8 | 865897.3 | 287987.3 | 1241276  | 295555.8 | 699878   | 327157.1 |
| 177772.8 | 181438.4 | 213638   | 152835.8 | 91879.88 | 504431.5 | 118644.9 | 276176.8 | 132151.8 |
| 93600.13 | 191330.7 | 334397.2 | 149885.8 | 73472.68 | 157295.9 | 106987.3 | 105607.8 | 207275.5 |
| 18515.21 | 9752.473 | 17067.37 | 126214.5 | 400822.6 | 179447.3 | 137302.9 | 66355.46 | 6551.399 |
| 175363   | 264824.3 | 364665.8 | 88911.46 | 33393.26 | 245612.4 | 195153.4 | 85602.5  | 163152.9 |
| 15281.83 | 18117.84 | 16394.26 | 12963.45 | 0        | 0        | 0        | 6673.987 | 1198.658 |
| 692329.4 | 723278.4 | 600953.9 | 746157.9 | 586287.6 | 479128.7 | 319122   | 175292.1 | 408903   |
| 99720.84 | 89943.69 | 86499.65 | 57609.03 | 71955.8  | 64974.84 | 48511.03 | 63286.36 | 96441.55 |
| 179100.2 | 291504.1 | 230018.9 | 191063.3 | 267938.5 | 193339.1 | 166321.6 | 275572.3 | 312291.5 |
| 28271.14 | 57987.45 | 59383.73 | 0        | 54578.18 | 46927.74 | 69660.68 | 79246.38 | 34037.24 |
| 274560   | 0        | 88834.4  | 515872.9 | 0        | 62905.78 | 37888.13 | 0        | 189654.7 |
| 535006.2 | 900519   | 879138.1 | 511660.5 | 475362.5 | 375749.3 | 342400.1 | 368484.7 | 199288.6 |
| 0        | 283844.5 | 257716.6 | 163597.7 | 0        | 116192.7 | 120535.2 | 66688.38 | 75664.17 |
| 35364.6  | 433025.7 | 65338.07 | 59126.36 | 85037.44 | 140739.7 | 108638.8 | 95955.8  | 115413   |
| 115929.4 | 242129.2 | 116168.5 | 125491.3 | 123986.5 | 86957.01 | 129200.4 | 44480.66 | 147843.9 |
| 1182952  | 1253862  | 1849520  | 1506395  | 729294.3 | 1167082  | 1333287  | 887463.6 | 1086711  |
| 113568.6 | 127946.4 | 106241.8 | 51939.99 | 25273.23 | 39421.75 | 47578.63 | 55886.55 | 36841.25 |
| 142393.3 | 105465.2 | 83287.96 | 61524.09 | 85495.95 | 37666.33 | 10553.64 | 57817.33 | 116511.6 |
| 277702.7 | 302782.2 | 166427.1 | 125597.2 | 39399.39 | 0        | 168095.6 | 77170.69 | 149956.8 |
| 227268.7 | 352500.4 | 190465.2 | 89264.55 | 279059.6 | 5445.412 | 79292.2  | 160858.3 | 88346.45 |
| 2520128  | 2390430  | 1495096  | 741895.2 | 1575611  | 452270.2 | 545643.3 | 3511261  | 293430.4 |
| 231090.4 | 140354.4 | 193441.8 | 168007.1 | 73942.91 | 83518.88 | 209141.2 | 124547.8 | 338486.1 |
| 64721.13 | 46143.54 | 90934.25 | 164509.8 | 0        | 12306.91 | 104329.8 | 27950.59 | 80436.22 |
| 760058.4 | 238806.6 | 264486.3 | 376979   | 117959   | 53135.61 | 88070.25 | 82128.52 | 138905.7 |
| 19839.71 | 21388.96 | 38859.91 | 11152.29 | 23659.21 | 10423.5  | 26607.53 | 37572.04 | 38161.75 |
| 1522119  | 2363486  | 2554163  | 1433349  | 621593.9 | 2094313  | 1377257  | 1479213  | 1145944  |
| 547020.3 | 319029.6 | 406476.3 | 413495.5 | 418680   | 349057.7 | 353929.4 | 419038.8 | 337738.6 |
| 231896.8 | 1402030  | 616955.4 | 812653.6 | 708147.9 | 745007.7 | 552418.6 | 309457   | 720294.9 |
| 480052.8 | 68075.59 | 0        | 159540.9 | 0        | 0        | 33421.93 | 0        | 0        |
| 20939734 | 32564240 | 35595312 | 18470518 | 12841470 | 18624924 | 20175728 | 13673477 | 14085332 |
| 7711159  | 11028673 | 9514520  | 7528759  | 2929263  | 5483487  | 4568538  | 4366425  | 4758544  |
| 22319.87 | 0        | 61016.41 | 0        | 22675.84 | 67687.49 | 18555.74 | 37419.96 | 18339.98 |
| 0        | 0        | 0        | 0        | 0        | 11580.74 | 0        | 0        | 12450.27 |
| 57308.6  | 34845.55 | 44166.79 | 64632.51 | 6021.902 | 0        | 0        | 0        | 22561    |
| 286604.4 | 0        | 0        | 121086.2 | 385769.9 | 0        | 384921.3 | 0        | 0        |
| 0        | 0        | 36619.89 | 0        | 54195.91 | 49613.49 | 61799.27 | 34732.74 | 45576.68 |
| 0        | 0        | 35322.8  | 0        | 49461.57 | 44193.63 | 60186.82 | 31074.12 | 45638.18 |

|          |          |          |          |          |          |          |          |          |
|----------|----------|----------|----------|----------|----------|----------|----------|----------|
| 588289.6 | 305050.6 | 500961.8 | 483013.5 | 452194.4 | 297551.6 | 233701.6 | 249409.2 | 623821.6 |
| 145823.4 | 115002.4 | 295480.5 | 212172.5 | 99932.73 | 335935.6 | 138637.8 | 137191.9 | 151139.4 |
| 99373.64 | 13795.96 | 0        | 0        | 0        | 69953.65 | 27566.82 | 0        | 129225   |
| 137973   | 148415.9 | 993917.2 | 436960.7 | 90348.05 | 120651.2 | 190925.8 | 121615   | 109855   |
| 470228.9 | 809589.8 | 1140314  | 576854.1 | 249343.1 | 193390.2 | 132710.4 | 161613.8 | 451480   |
| 52498.8  | 22688    | 22481.87 | 12824.06 | 26365.05 | 9788.521 | 8370.316 | 0        | 7563.517 |
| 0        | 26260.11 | 49064.64 | 0        | 26505.46 | 59807.09 | 59558.11 | 0        | 24654.63 |
| 45006.8  | 119965.2 | 48177.58 | 125173.2 | 22241.87 | 21613.96 | 50237.94 | 19192.04 | 78602.86 |
| 395316.5 | 1001768  | 485968.8 | 276400.3 | 504441.1 | 116315.6 | 471959.9 | 3469378  | 364860.4 |
| 93918184 | 55451688 | 1.36E+08 | 52608592 | 64031552 | 67011228 | 73203360 | 60641784 | 72510664 |
| 594908.6 | 1607963  | 713304.8 | 339826.7 | 322689.2 | 267426.4 | 6856.879 | 408679.3 | 389631.6 |
| 58365.57 | 121725.3 | 140005.8 | 72234.26 | 74952.97 | 87342.78 | 98229.03 | 96898.18 | 48063.09 |
| 135828.7 | 288475.6 | 341356.6 | 113424.7 | 326441.7 | 337844.4 | 332533.2 | 450245.5 | 556769.9 |
| 23943.82 | 0        | 23619.04 | 30050.61 | 0        | 11466.81 | 0        | 30976    | 35235.54 |
| 168577.8 | 129189.3 | 1339368  | 114986.5 | 98888.26 | 185735.3 | 0        | 192285.2 | 12891.74 |
| 4615003  | 7740938  | 4885135  | 4273712  | 168823   | 2709602  | 1655236  | 1342061  | 4694484  |
| 272105.2 | 154509.3 | 74663.92 | 65243.96 | 111529.5 | 135782.5 | 139984.7 | 80810.27 | 134927.4 |
| 162772.2 | 218056   | 274606.9 | 130449.8 | 113865.1 | 305907.1 | 240784.2 | 84412.53 | 147582.8 |
| 54461.34 | 77255.09 | 38696.99 | 76717.85 | 7708.785 | 77262.36 | 54241.2  | 0        | 46112.69 |
| 724775.9 | 700398.8 | 1482898  | 577128.7 | 504228.7 | 127162.5 | 448992   | 109688.8 | 187348.9 |
| 345235.3 | 500241.8 | 239874.2 | 155281.5 | 102200.8 | 204986.3 | 449984.1 | 151707.2 | 187402.4 |
| 1061010  | 935605.6 | 508084.9 | 254092.8 | 1847741  | 3588054  | 363080.1 | 2218176  | 2088218  |
| 6161852  | 7490662  | 6092268  | 6781359  | 7656070  | 6560067  | 6831930  | 7726955  | 8037150  |
| 56753.9  | 0        | 56520.35 | 0        | 10779.95 | 4199.216 | 6643.271 | 14415.94 | 6950.146 |
| 26731.59 | 0        | 0        | 0        | 22175.51 | 27616.89 | 30220.86 | 34558.91 | 24536.02 |
| 14801217 | 14071432 | 5512560  | 21824434 | 25392864 | 11665385 | 21742488 | 27696990 | 14995540 |
| 281226.9 | 192071   | 332906.6 | 199922.5 | 186950.3 | 162583   | 179988.8 | 102865.5 | 293816.3 |
| 3084.418 | 2715.042 | 3790.634 | 2575.045 | 3665.278 | 0        | 2892.615 | 4345.396 | 3757.223 |
| 15263.47 | 26097.34 | 6960.94  | 6661.075 | 12402.56 | 7226.464 | 0        | 9628.118 | 5963.852 |
| 471472.4 | 413787.4 | 0        | 265155.8 | 112432.7 | 317658   | 326626.7 | 128195.3 | 258753.9 |
| 13757.63 | 12470.82 | 13132.87 | 16749.25 | 14177.16 | 13173.66 | 11891.99 | 13462.63 | 11988.76 |
| 11414531 | 8910674  | 7163990  | 8615744  | 10746781 | 11134501 | 9256287  | 10573767 | 10743596 |
| 100300.7 | 89092.13 | 34474.71 | 115908.1 | 134178.3 | 109878.2 | 159490.3 | 234693   | 168291   |
| 2785335  | 3027082  | 2970207  | 3101779  | 4877519  | 2543836  | 3293417  | 1933583  | 3767585  |
| 74011.09 | 79898.64 | 65884.51 | 100885.1 | 149953.5 | 94134.42 | 129014.8 | 118934.7 | 183094   |
| 115466   | 93109.75 | 145765.9 | 153238   | 182918.4 | 112253.4 | 187855   | 129863.9 | 90890.26 |
| 347700.9 | 275183.2 | 37984.03 | 73053.65 | 271485.5 | 235546.6 | 247017.8 | 255128.3 | 322696.5 |
| 0        | 0        | 5460.881 | 0        | 7321.967 | 5394.778 | 0        | 12964.63 | 5044.613 |
| 32669.88 | 14739.99 | 22636.29 | 0        | 2700.135 | 24411.23 | 26760.54 | 28810.5  | 32815.37 |
| 123213.1 | 118696   | 59975.67 | 108021.7 | 100429.2 | 96838.23 | 101312.8 | 144988.6 | 98005.68 |
| 991535.3 | 920894.6 | 1024792  | 678049.8 | 1121254  | 1267099  | 943345.8 | 1156784  | 845692.4 |
| 3036662  | 2223215  | 2272428  | 1696184  | 1822652  | 3838284  | 7413.006 | 7761.815 | 31805.8  |
| 40370.85 | 20074.13 | 28938.36 | 25312.44 | 35608.91 | 57171.29 | 29667.44 | 55637.28 | 30687.57 |
| 54378.77 | 47216.06 | 14145.18 | 41516.89 | 14286.64 | 9120.183 | 6356.763 | 10016.45 | 8205.501 |
| 0        | 0        | 8030.21  | 0        | 21655.96 | 8611.083 | 8469.369 | 0        | 0        |
| 814301.5 | 741305.9 | 1864349  | 839496.8 | 898121.4 | 980773   | 821390.8 | 893354.6 | 0        |
| 214399.3 | 221893.6 | 182611.6 | 198647.8 | 312528.8 | 215750.9 | 249386.1 | 230649.8 | 327495.1 |
| 61826.79 | 39921.59 | 52242.4  | 50972.14 | 67543.41 | 43873.43 | 49610.21 | 53011.13 | 76195.38 |
| 17084.41 | 5592.516 | 9044.639 | 33661.28 | 18131.33 | 14061.6  | 22619.23 | 11705.46 | 0        |
| 3929105  | 5122550  | 5891767  | 3067794  | 2962724  | 3730914  | 1483689  | 747491.8 | 4512691  |
| 0        | 0        | 14937.36 | 0        | 9279.973 | 0        | 0        | 0        | 0        |
| 0        | 0        | 6163.404 | 0        | 37444.16 | 10810.56 | 29903.6  | 17482.89 | 23363.51 |
| 0        | 46854.96 | 0        | 0        | 0        | 0        | 0        | 0        | 13062.75 |
| 8688.722 | 7284.266 | 22414.21 | 8335.631 | 12378.95 | 18758.46 | 11762.3  | 11125.85 | 10278.33 |
| 752909.9 | 503033.4 | 554612.3 | 711036.6 | 1022618  | 733254.1 | 757916.8 | 758869.8 | 1352586  |
| 148199.7 | 45574.97 | 82756.82 | 156128   | 34293.41 | 59643.61 | 81939.2  | 61738.93 | 111279.2 |
| 74656.4  | 121061.1 | 71405.86 | 38494.44 | 158368.4 | 102144.5 | 34020.35 | 122288.4 | 96908.45 |
| 4038531  | 4521440  | 3277710  | 7362176  | 6409396  | 3759258  | 5353827  | 3376494  | 4651942  |

|          |          |          |          |          |          |          |          |          |
|----------|----------|----------|----------|----------|----------|----------|----------|----------|
| 0        | 0        | 18020.01 | 11363.91 | 0        | 31205.23 | 0        | 28311.49 | 24512.34 |
| 2481771  | 3328410  | 4375366  | 1591100  | 2605749  | 2570290  | 2621007  | 3210740  | 2803862  |
| 1713623  | 0        | 2172695  | 1921193  | 0        | 0        | 0        | 0        | 314408.6 |
| 93913.5  | 450531.3 | 109820   | 0        | 108434.4 | 173883.2 | 0        | 41214.65 | 32113.58 |
| 955930.6 | 602660   | 405117.7 | 257333.2 | 615268.5 | 1160220  | 587012.1 | 1014296  | 1084148  |
| 0        | 440336.5 | 1035100  | 0        | 0        | 0        | 0        | 1418.902 | 1669.904 |
| 0        | 0        | 26851.53 | 40591.12 | 16164.77 | 0        | 0        | 0        | 0        |
| 6646.501 | 5391.11  | 16747.49 | 6574.728 | 61395.66 | 36870.96 | 69383.23 | 53844.64 | 47204.27 |
| 340034.3 | 259274.4 | 119755.5 | 263831.6 | 148426.5 | 461580.7 | 85594.23 | 21273.86 | 9949.438 |
| 0        | 0        | 0        | 0        | 57875.34 | 8380.072 | 5611.742 | 0        | 0        |
| 4472331  | 4783341  | 3998885  | 4893722  | 6562540  | 4549179  | 5397348  | 6513820  | 5829794  |
| 0        | 0        | 2682.277 | 3806.251 | 14785.52 | 4231.289 | 5749.797 | 3334.574 | 3374.163 |
| 41582.39 | 48054.14 | 91185.28 | 43002.01 | 85646.98 | 45128.96 | 60673.55 | 38596.97 | 54322.46 |
| 23761.12 | 28336.54 | 13875.79 | 8785.808 | 20971.13 | 17514.58 | 20580.2  | 17673.45 | 16596.06 |
| 31790.44 | 23485.2  | 40360.39 | 18544.5  | 17407.01 | 14814.05 | 11597.4  | 12597.53 | 9940.468 |
| 61658.74 | 55846.66 | 88494.27 | 24215.84 | 0        | 84881.98 | 0        | 0        | 33049.61 |
| 693546.4 | 0        | 0        | 0        | 9002.32  | 4580.188 | 0        | 263894.3 | 878910.4 |
| 35425.85 | 0        | 60142.53 | 0        | 55060.2  | 0        | 3460.241 | 84167.16 | 22988.61 |
| 250445.6 | 264452.8 | 338144.2 | 32123.24 | 445497.9 | 463578   | 368516.7 | 418241   | 306015.3 |
| 484874.8 | 316312   | 337155.9 | 300823.4 | 424133.7 | 374833.6 | 426674.5 | 431180.8 | 386662.7 |
| 25393.86 | 18406.9  | 21018.56 | 28994.82 | 0        | 0        | 34134.22 | 21381.03 | 26076.85 |
| 430883.7 | 173528.2 | 30815.71 | 277652.8 | 512990.3 | 170778.7 | 417231.9 | 272167.9 | 241725.2 |
| 1770161  | 1692205  | 1927588  | 382680   | 2620919  | 2590672  | 1948629  | 2219454  | 2038029  |
| 17318.07 | 10680.86 | 15377    | 12356.67 | 20080.93 | 9279.455 | 14229.03 | 14874.91 | 15363.44 |
| 82594.85 | 48531.7  | 64698.41 | 52169.55 | 83249.77 | 58296.12 | 61880.18 | 84852.95 | 65216.04 |
| 569567.2 | 310094.7 | 625198.3 | 318979.7 | 806388.8 | 682425.2 | 355961.3 | 564228.4 | 957702.6 |
| 14363.61 | 0        | 0        | 0        | 28626.78 | 3364.103 | 6589.565 | 4921.884 | 15806.44 |
| 242859.2 | 166378   | 105744.4 | 246206.2 | 263630   | 220446.7 | 7079701  | 137605   | 226776.1 |
| 39984.91 | 35634.04 | 24251.04 | 34699.77 | 59955.66 | 30109.9  | 47084.55 | 49346.79 | 53466.33 |
| 0        | 28397.7  | 13884.48 | 11213    | 12386.18 | 0        | 12987.57 | 11660.8  | 19568.39 |
| 0        | 0        | 0        | 0        | 16501.52 | 28813.39 | 0        | 0        | 0        |
| 16199051 | 15015754 | 10166231 | 16648950 | 17391768 | 15442178 | 11140253 | 16828162 | 15180038 |
| 15163.85 | 0        | 15079.75 | 16006.08 | 46892.52 | 0        | 0        | 53292.81 | 0        |
| 27287.29 | 23722.67 | 41742.05 | 28951.69 | 34533.59 | 42438.83 | 48148.88 | 60613.37 | 0        |
| 0        | 11871.23 | 7365.675 | 0        | 0        | 8089.369 | 0        | 0        | 14403.49 |
| 7035.461 | 6409.087 | 38880.99 | 0        | 8029.364 | 3376.181 | 0        | 5446.729 | 0        |
| 393755.8 | 269152.9 | 212955.6 | 199798   | 246325.3 | 122714.4 | 208012.7 | 209536.7 | 261875.5 |
| 0        | 28090.99 | 15191.67 | 0        | 0        | 33663.18 | 19930.11 | 22069.72 | 17879.73 |
| 13311.87 | 28933.16 | 33268.9  | 23933.83 | 33705.7  | 21895.32 | 22687.08 | 20799.82 | 25676.78 |
| 14198395 | 15163743 | 29041140 | 12720361 | 15160969 | 14989711 | 12733666 | 15026878 | 13141626 |
| 221920   | 311402.6 | 123360.2 | 179934.4 | 233841.3 | 350699.2 | 200362.1 | 245700.1 | 300588.5 |
| 8234.525 | 7192.001 | 6583.176 | 6541.089 | 9097.115 | 12790.88 | 11969.93 | 16170.7  | 12248.3  |
| 15843.94 | 14445.62 | 19788.88 | 16270.16 | 18521.6  | 11638.97 | 20296.78 | 19989.24 | 0        |
| 52071.73 | 32531.47 | 46022.12 | 51331.61 | 37645.45 | 46261.39 | 33069.19 | 56823.2  | 33006.34 |
| 24759216 | 8073955  | 8066290  | 21694576 | 21675734 | 27056662 | 20736116 | 24750398 | 3373612  |
| 106562.4 | 231939.8 | 281009.8 | 317533.9 | 175234.5 | 99591.38 | 222848.7 | 207082.7 | 122964.9 |
| 8428.733 | 3957.344 | 42976.85 | 0        | 31917.78 | 3742.261 | 5599.648 | 6598.974 | 7529.329 |
| 310411.1 | 58644.86 | 243050.6 | 346787.9 | 354236.8 | 100556.1 | 74923.29 | 97328.12 | 55720.09 |
| 26554.67 | 22332.58 | 28533.3  | 18567.76 | 43259.61 | 31095.37 | 38081.11 | 37202.64 | 36749.21 |
| 6136.778 | 15517.88 | 0        | 11272.53 | 17173.08 | 0        | 12155.19 | 0        | 17525.73 |
| 0        | 10316324 | 0        | 0        | 3078.166 | 1360.073 | 0        | 759.8445 | 34737.79 |
| 447878.2 | 707093.9 | 516100.7 | 355216.1 | 511078.7 | 706775   | 536129.1 | 876471.8 | 714259.8 |
| 225889.2 | 264594.6 | 293423.7 | 311108.9 | 317479.2 | 329190.4 | 303360.2 | 343876.1 | 325891.3 |
| 86514    | 80051.43 | 166343.3 | 115709.9 | 248776.7 | 213148.5 | 243001.5 | 236940.3 | 121594.3 |
| 5877993  | 19809104 | 3925828  | 9061078  | 4443892  | 11545380 | 8598889  | 10316165 | 5771365  |
| 18572808 | 19840554 | 17770172 | 15945151 | 14529628 | 16452801 | 15757913 | 17438146 | 18129292 |
| 393723.6 | 344197.2 | 558415.6 | 818215.2 | 463396.5 | 613368.5 | 1067596  | 1085031  | 453661.1 |
| 1517090  | 2003769  | 1421186  | 1965097  | 12662.08 | 1556849  | 1439006  | 1926531  | 1365128  |



|          |          |          |          |          |          |          |          |          |
|----------|----------|----------|----------|----------|----------|----------|----------|----------|
| 11479415 | 9743890  | 8107439  | 11373360 | 12378425 | 14755125 | 12001350 | 13268227 | 10984650 |
| 59981.73 | 60913.64 | 62660.46 | 52669.96 | 71244.5  | 65364.38 | 57689.82 | 67893.27 | 49511.98 |
| 41922.43 | 40841.77 | 31527.06 | 31794.08 | 36820.84 | 33488.15 | 24147.44 | 28078.89 | 35951.4  |
| 10207.2  | 14160.7  | 29704.63 | 20020.31 | 8233.858 | 21172.56 | 24256.58 | 22584.9  | 0        |
| 354621.4 | 446172.7 | 307954.4 | 2404500  | 535658.4 | 6502357  | 5732900  | 3569726  | 1933820  |
| 1386148  | 2108702  | 1796606  | 1508899  | 1150850  | 2630646  | 2556053  | 1128546  | 1520360  |
| 0        | 0        | 0        | 194976.6 | 151933.6 | 78548.17 | 93791.81 | 76096.2  | 109309.4 |
| 1468583  | 1420118  | 1380553  | 1611316  | 1156073  | 1330462  | 1327518  | 1476216  | 1077475  |
| 0        | 0        | 0        | 0        | 90053.34 | 0        | 0        | 60574.09 | 0        |
| 22199.04 | 0        | 0        | 0        | 0        | 0        | 0        | 0        | 3491.474 |
| 330208.5 | 0        | 0        | 178448.4 | 217226.6 | 0        | 178973   | 237364.3 | 169194.1 |
| 7457.315 | 13911.51 | 7177.544 | 5610.576 | 17189.88 | 0        | 17711.87 | 20082.74 | 0        |
| 18701634 | 19832140 | 16827884 | 16864374 | 22513226 | 17590514 | 17722192 | 17801484 | 19042854 |
| 161373.4 | 199977.4 | 0        | 137983.6 | 0        | 17631.58 | 0        | 0        | 0        |
| 0        | 27689.22 | 23919.48 | 1721.092 | 2924.557 | 1879.851 | 0        | 0        | 33265.29 |
| 0        | 0        | 0        | 5632.932 | 0        | 0        | 0        | 0        | 13018.06 |
| 12443.54 | 9632.692 | 9092.943 | 12837.58 | 17555.2  | 13747.52 | 14227.99 | 10999.48 | 13984.67 |
| 2823058  | 4614414  | 3184907  | 3361331  | 3159643  | 3901583  | 1860981  | 3814864  | 5128877  |
| 1244.018 | 2617.81  | 3206.794 | 2165.974 | 19276.71 | 2586.889 | 0        | 0        | 7299.854 |
| 8616.764 | 9567.303 | 7540.067 | 7099.033 | 10329.8  | 8345.002 | 10169.31 | 4224.72  | 10492.4  |
| 64500.48 | 31916.29 | 10600.39 | 15460.43 | 20723.31 | 14676.1  | 12777.31 | 13799.28 | 8264.135 |
| 0        | 0        | 0        | 0        | 10126.98 | 0        | 6509.366 | 0        | 5326.871 |
| 8965668  | 10770110 | 2362068  | 8775662  | 8368955  | 8721456  | 9569015  | 13151686 | 6872549  |
| 13125.98 | 11484.06 | 13110.14 | 12324.09 | 8251.342 | 10687.96 | 12125.38 | 12468.47 | 14029.17 |
| 156045.1 | 4665688  | 4198809  | 90159.35 | 6384547  | 2840090  | 3751537  | 5053307  | 3259504  |
| 985348.2 | 850427.5 | 691469.5 | 1067804  | 1584194  | 2366769  | 1507529  | 2152249  | 1609863  |
| 0        | 0        | 0        | 0        | 5083.813 | 0        | 0        | 3570.091 | 3540.382 |
| 29102.72 | 13192.63 | 43539.27 | 7003.037 | 7533.859 | 0        | 9743.895 | 4621.479 | 9832.301 |
| 7711.499 | 7048.4   | 0        | 7080.454 | 9321.264 | 3720.988 | 8481.908 | 9902.052 | 5070.537 |
| 455701.1 | 811857.3 | 497689.4 | 438210.6 | 489180   | 734049.4 | 632530.3 | 699638.7 | 754114.9 |
| 7907.74  | 3750.88  | 6444.691 | 8978.087 | 15784.39 | 8240.397 | 3654.549 | 8468.647 | 6372.639 |
| 27590.59 | 34554.46 | 28145.65 | 32435.18 | 52622.65 | 50714.61 | 51590.51 | 47458.08 | 59925.63 |
| 172824.2 | 190721.3 | 155232.9 | 209862.6 | 152489.1 | 159391.7 | 223647.9 | 191354.5 | 196020.4 |
| 27039.7  | 6560.509 | 7908.045 | 156822.8 | 3672.216 | 0        | 0        | 3915.053 | 15815.88 |
| 1872710  | 942035.3 | 5415882  | 944695.2 | 1456129  | 762761.4 | 6161525  | 1230545  | 46796.77 |
| 6541.926 | 3416.571 | 0        | 0        | 0        | 0        | 0        | 0        | 0        |
| 10409.33 | 6710.216 | 9570.792 | 7816.165 | 50903.95 | 53117.57 | 49976.28 | 81822.06 | 62578.19 |
| 19067.77 | 21254.1  | 0        | 14433.6  | 0        | 30830.37 | 20944.97 | 21648.52 | 19105.72 |
| 271868.2 | 245919.5 | 178547.9 | 223944.5 | 293584.9 | 291703.7 | 389830.6 | 213853.5 | 334530.3 |
| 23168.38 | 23761.42 | 22959.31 | 14209.69 | 20188.6  | 4342.27  | 7449.191 | 8768.266 | 10122.31 |
| 0        | 0        | 0        | 0        | 0        | 20874.84 | 19775.95 | 23040.95 | 0        |
| 81562.34 | 1337688  | 0        | 209879.7 | 5501.785 | 3415188  | 232169.6 | 102489.7 | 147938.8 |
| 89270.31 | 0        | 210438.5 | 0        | 252112   | 338627.3 | 0        | 269113.8 | 283461.4 |
| 5573435  | 559245.1 | 845839.1 | 1312624  | 1073655  | 1307229  | 839493.7 | 3407113  | 1009817  |
| 14039781 | 17448056 | 17036042 | 17211840 | 19238138 | 18596584 | 16636823 | 23396258 | 21850530 |
| 242843.8 | 270164   | 66996.31 | 263235.1 | 0        | 83445.07 | 83295.62 | 132501.3 | 65329.02 |
| 0        | 0        | 0        | 0        | 75087.3  | 62834.51 | 32070.81 | 9242.896 | 0        |
| 73395.27 | 66749.41 | 51401.31 | 67645.49 | 70152.8  | 72113.86 | 71692.98 | 80416.86 | 83390.3  |
| 10266.63 | 6627.41  | 9864.948 | 4230.57  | 0        | 12743.27 | 7380.661 | 21142.66 | 18896.5  |
| 1927215  | 1547873  | 1711309  | 1719841  | 2026957  | 2424047  | 1889559  | 2267978  | 1691343  |
| 22304.52 | 18309.5  | 34494    | 15015.81 | 13817.68 | 11550.38 | 7852.978 | 13089.98 | 12822.06 |
| 170449.8 | 70439.7  | 171230   | 471788.6 | 758940.6 | 334374.4 | 528582.3 | 393512.5 | 287858.8 |
| 1.11E+08 | 98954832 | 1.14E+08 | 1.19E+08 | 1.83E+08 | 1.66E+08 | 1.3E+08  | 1.51E+08 | 1.46E+08 |
| 19067860 | 14616366 | 11922500 | 14944411 | 28593020 | 28036638 | 19515588 | 25025002 | 21888618 |
| 467509.3 | 0        | 9035722  | 1148153  | 0        | 26092112 | 189420.5 | 284743.4 | 2832058  |
| 300512.1 | 285819.6 | 216969.3 | 359055.5 | 474527.5 | 253162.4 | 411633.6 | 405476.1 | 439302.2 |
| 6690914  | 60920616 | 5551582  | 69393200 | 1.52E+08 | 5196107  | 4732902  | 4152548  | 5559290  |
| 4332143  | 6920130  | 8737848  | 4097320  | 1972394  | 2688968  | 3005849  | 1590871  | 4687086  |

|          |          |          |          |          |          |          |          |          |
|----------|----------|----------|----------|----------|----------|----------|----------|----------|
| 307433.3 | 155427.5 | 338240.3 | 111364.3 | 180295.6 | 146681.6 | 214877.5 | 188159.6 | 137124.9 |
| 15751289 | 29924024 | 20858380 | 12789997 | 10981461 | 9707487  | 19493130 | 13791513 | 21051764 |
| 45475.26 | 17397.75 | 23745.11 | 22904.38 | 31102.03 | 27837.47 | 27673.97 | 27935.63 | 23528.23 |
| 16737.21 | 42753.63 | 61372.79 | 65444.41 | 72008.22 | 55612.16 | 115600.5 | 50808.3  | 34899.36 |
| 29487.22 | 53822.33 | 58218.23 | 72384.87 | 0        | 0        | 0        | 0        | 50726.7  |
| 122085.8 | 135804   | 116073.7 | 103995.3 | 118019.6 | 198655.2 | 147994.6 | 202819   | 163248.9 |
| 91729.83 | 91298.8  | 72151.06 | 92319.24 | 147235   | 50761.29 | 79306.49 | 102551   | 48909.96 |
| 962593.3 | 950660.8 | 857958.3 | 835684.4 | 899534.2 | 1100145  | 786133.1 | 952734.9 | 1005719  |
| 57582.66 | 48658.62 | 94304.73 | 87583.51 | 37376.13 | 42382.74 | 33365.96 | 42340.5  | 68766.88 |
| 0        | 0        | 0        | 0        | 0        | 0        | 30048.4  | 245347.2 | 45912.28 |
| 71979.52 | 536303.3 | 187333.4 | 149917.4 | 828086.8 | 1249734  | 737974.4 | 1056842  | 2270456  |
| 435445.5 | 543784.1 | 481263.1 | 261638.6 | 311330.8 | 384038.6 | 191268.4 | 310905.5 | 208671.8 |
| 10532.96 | 17275.11 | 11435.02 | 12065.23 | 0        | 9975.752 | 11731.3  | 0        | 23618.45 |
| 16578.37 | 34352.71 | 17803.55 | 18101.05 | 37994.11 | 24316.71 | 25353.24 | 25783.3  | 28923.44 |
| 26905.14 | 19109.62 | 18286.63 | 16774.45 | 22431.18 | 13427.45 | 27543.17 | 35297.78 | 28901.48 |
| 259941   | 7788.132 | 148305.4 | 159056   | 158646.1 | 135148.8 | 129214.9 | 8068.231 | 137626.2 |
| 0        | 4659.988 | 0        | 0        | 5999.682 | 4880.133 | 0        | 0        | 3496.276 |
| 0        | 11567.13 | 93267.55 | 11137.17 | 13199.18 | 118520.9 | 32777.39 | 0        | 51844.69 |
| 3238064  | 2594879  | 1010944  | 4539961  | 4854904  | 2765615  | 4836203  | 9874755  | 4623315  |
| 605.5343 | 50792.17 | 0        | 0        | 3666.46  | 6090.563 | 38992.8  | 17578.93 | 2303.099 |
| 0        | 0        | 0        | 0        | 0        | 0        | 12730.15 | 9514.186 | 15311.49 |
| 78221.73 | 117137.1 | 0        | 105299.6 | 112423.5 | 40043.87 | 0        | 44495.56 | 64638.06 |
| 448942.1 | 299141.6 | 303260.1 | 814338.3 | 1033046  | 353496.4 | 456211.7 | 519764   | 703257.5 |
| 166693.2 | 147937   | 114873.8 | 135380.8 | 122545.6 | 105331.6 | 110793.7 | 156420.7 | 157675.9 |
| 670151.1 | 1048518  | 440566.5 | 657500.9 | 1483588  | 981704   | 776689.4 | 1101256  | 728433.1 |
| 4804.782 | 2697.181 | 0        | 0        | 4522.912 | 2521.063 | 3922.333 | 6410.939 | 2597.982 |
| 65347.31 | 54018.41 | 74875.5  | 93972.73 | 123248.3 | 123982.2 | 128477.6 | 118352.4 | 97604.38 |
| 0        | 48574.9  | 39541.49 | 0        | 0        | 0        | 1240.746 | 15626.95 | 81175.51 |
| 15844.08 | 14445.68 | 19788.91 | 16270.15 | 0        | 11638.97 | 20296.76 | 14664.57 | 0        |
| 3459.769 | 0        | 0        | 1935.666 | 4434.758 | 4044.624 | 7767.724 | 9770.345 | 3388.142 |
| 1490559  | 1173150  | 1151442  | 891090.8 | 760282.8 | 2006172  | 897365.7 | 1002325  | 641367.7 |
| 1547382  | 689183.8 | 1840366  | 3412309  | 3816146  | 3089979  | 2140024  | 2864079  | 1382193  |
| 216460.6 | 358838.3 | 138791.1 | 689588.9 | 459396   | 365809.7 | 380752.7 | 326144.4 | 359876.6 |
| 420029.5 | 453111.1 | 450787.8 | 436474.4 | 423472.8 | 385570.1 | 425363.8 | 454898.3 | 511415.1 |
| 2334902  | 2748980  | 2137981  | 2500456  | 2412910  | 2319980  | 2288823  | 3012824  | 3055270  |
| 4981.448 | 4209.45  | 5135.356 | 0        | 0        | 0        | 4974.323 | 1801.689 | 2534.709 |
| 16018.86 | 7146.206 | 0        | 0        | 0        | 39275.6  | 8781.932 | 17693.25 | 0        |
| 26096.98 | 42043.02 | 64363.7  | 73027.5  | 17496.35 | 8583.082 | 33382.09 | 31414.22 | 39126.2  |
| 49151.19 | 37779.78 | 12618.39 | 45705.6  | 43748.2  | 28587.31 | 29595.01 | 28460.98 | 43986.42 |
| 4809.508 | 1945.919 | 1698.378 | 10634.66 | 3581.971 | 9373.611 | 0        | 0        | 4404.029 |
| 70170.01 | 114947.2 | 103116.9 | 115451.6 | 99310.2  | 31318.43 | 42124.13 | 80868.5  | 33430.04 |
| 0        | 0        | 5351.253 | 4212.16  | 9298.428 | 1841.487 | 3197.578 | 3941.5   | 1778.603 |
| 3764382  | 4207114  | 4049748  | 5183157  | 5307946  | 4380329  | 4453023  | 5164019  | 5058795  |
| 1.07E+08 | 50384268 | 1.24E+08 | 2.36E+08 | 3.48E+08 | 2.45E+08 | 1.55E+08 | 2.01E+08 | 1.01E+08 |
| 19590396 | 7967525  | 24392576 | 37022372 | 79478608 | 60288892 | 38359928 | 42952640 | 21760950 |
| 205308   | 222668.6 | 210370.1 | 209472.5 | 246908.8 | 235236.8 | 225434.2 | 252524.9 | 255307.9 |
| 5436440  | 5628918  | 4843073  | 5082729  | 5637941  | 8055185  | 4642012  | 6582843  | 7095494  |
| 592090.8 | 979641.6 | 1479211  | 519256.4 | 691672.4 | 977526.6 | 797901.6 | 833788.1 | 1354895  |
| 69126.11 | 0        | 8726.481 | 16171.7  | 5476.685 | 21604.12 | 0        | 24667.5  | 0        |
| 24182760 | 26699356 | 29543138 | 26295094 | 24834950 | 27815032 | 23497350 | 27456404 | 22935334 |
| 63647136 | 55710496 | 64354996 | 55913188 | 74547312 | 75764752 | 59442144 | 83948640 | 52560436 |
| 1360522  | 1252107  | 1254514  | 1410342  | 1571763  | 1665878  | 1235912  | 1829610  | 1206789  |
| 7414135  | 5166194  | 5186664  | 3148599  | 3663913  | 5686980  | 4563449  | 6449211  | 2759816  |
| 398836.4 | 264266.9 | 920925.7 | 195200   | 220415.2 | 340732.2 | 239016.3 | 179728.6 | 506085.1 |
| 1028820  | 1329044  | 681098.3 | 481460.2 | 744053.6 | 532359.4 | 302755.5 | 335193   | 444806.3 |
| 280120.2 | 218611.6 | 101592.4 | 171708   | 133993.7 | 255541.6 | 251120.6 | 162146.9 | 68258.79 |
| 348520.1 | 162476.4 | 760850.6 | 257796.7 | 43567.83 | 164291.8 | 140760.1 | 332264.8 | 202280.8 |
| 165277   | 218043.8 | 362634.8 | 295481.6 | 50873.41 | 75584.75 | 117970.3 | 72955.46 | 102868.6 |

|          |          |          |          |          |          |          |          |          |
|----------|----------|----------|----------|----------|----------|----------|----------|----------|
| 30621.97 | 17645.95 | 30036.66 | 46756.43 | 44845.51 | 19198.7  | 19810.7  | 20287.44 | 0        |
| 39677.98 | 77946.15 | 44458.27 | 42577.81 | 62036.71 | 109221.8 | 73429.25 | 54129.05 | 58005.8  |
| 44572076 | 34776876 | 38742632 | 27711118 | 14017683 | 43844020 | 22642326 | 26987650 | 18693508 |
| 16209.02 | 10143.66 | 13587.1  | 0        | 0        | 14223.91 | 10948.35 | 11381.07 | 2124.354 |
| 37369.05 | 705288.8 | 101941.1 | 102061.6 | 645479.4 | 956955.8 | 447508.8 | 1137194  | 1551819  |
| 44245276 | 41131944 | 26282328 | 32370110 | 45748304 | 32568850 | 28039580 | 38542740 | 36871264 |
| 35667164 | 54814464 | 54720368 | 53175596 | 37994664 | 51674032 | 46465296 | 49918140 | 54741396 |
| 84725736 | 1.21E+08 | 1.26E+08 | 1.31E+08 | 1.05E+08 | 1.27E+08 | 1.14E+08 | 1.33E+08 | 1.37E+08 |
| 57491896 | 88191880 | 82998616 | 81128632 | 77141600 | 93198840 | 81162904 | 92243088 | 94744824 |
| 3983102  | 2315539  | 5977426  | 2702743  | 6211281  | 1215799  | 5826240  | 2235122  | 4381270  |
| 450462.5 | 292045.8 | 501200.5 | 820722.5 | 674354.9 | 617675.2 | 622581.1 | 658530.8 | 747361.2 |
| 11458973 | 7216099  | 6892410  | 6905781  | 12765194 | 8049740  | 7914726  | 9115849  | 9366555  |
| 3345431  | 5702547  | 4398313  | 4969809  | 1571010  | 6580824  | 4278613  | 5057927  | 4918472  |
| 2881291  | 2555682  | 3636232  | 3831505  | 4310331  | 3758011  | 4923013  | 2872033  | 2562419  |
| 3944014  | 2895651  | 3079567  | 4088140  | 5002823  | 3260099  | 4243657  | 4588476  | 3441989  |
| 1.09E+08 | 83184520 | 83754688 | 1.04E+08 | 1.4E+08  | 97417528 | 99901552 | 92730192 | 91981184 |
| 2.84E+09 | 2.31E+09 | 1.92E+09 | 1.99E+09 | 2.42E+09 | 1.93E+09 | 2.02E+09 | 1.67E+09 | 1.97E+09 |
| 100179.9 | 92323.5  | 99347.03 | 88553.41 | 102895   | 50017.66 | 89356.02 | 50621.37 | 85527.52 |
| 1.91E+08 | 1.35E+08 | 1.27E+08 | 99994480 | 1.22E+08 | 1.13E+08 | 89050368 | 1.01E+08 | 1.49E+08 |
| 60021052 | 52827892 | 49472948 | 60974384 | 67559928 | 59342936 | 51131664 | 53519676 | 49826384 |
| 44832.58 | 45563.46 | 48665.38 | 68434.11 | 0        | 35729.96 | 22240.49 | 6850.265 | 76258.93 |
| 136696   | 126540.2 | 101006.6 | 172016.3 | 98940.98 | 156790.9 | 97665.71 | 151632.5 | 144386.1 |
| 9261184  | 12627898 | 8653354  | 13667245 | 15730142 | 13394124 | 11835922 | 17009930 | 12623859 |
| 4278015  | 2659262  | 4272134  | 2232803  | 2389119  | 3004465  | 2069620  | 5375243  | 3507004  |
| 19211816 | 15946252 | 11724780 | 10996079 | 14676428 | 13507505 | 13918848 | 13600618 | 13181811 |
| 321620.5 | 517977.1 | 534188.6 | 499919.8 | 355685.7 | 268570.3 | 574244   | 266372.8 | 654960.2 |
| 818340.8 | 1201922  | 1200316  | 450982   | 330379.5 | 889955.1 | 817685   | 894937.9 | 912349.1 |
| 80244.05 | 102454.4 | 84132.33 | 105898.7 | 120495.3 | 99228.44 | 117180.2 | 95503.2  | 91071.21 |
| 10277.71 | 27423.48 | 13221.24 | 11476    | 10802.97 | 0        | 4914.109 | 0        | 6506.119 |
| 395102.4 | 337415.5 | 425789.8 | 399927.6 | 654193.2 | 458307.5 | 538096.9 | 611051.9 | 558462.1 |
| 2354976  | 1763717  | 1967583  | 2909934  | 4688157  | 3727220  | 2669666  | 3102955  | 3264390  |
| 82550.56 | 276656   | 214623.3 | 188018.3 | 953005.7 | 1279470  | 812170.4 | 1080252  | 2450693  |
| 49196.25 | 57443.14 | 51851.83 | 56995.52 | 52220.36 | 50752.19 | 46974.38 | 47017.82 | 53607.58 |
| 98937.46 | 606410.6 | 2064373  | 907655.9 | 314362.2 | 799326.3 | 1001024  | 937843.9 | 847842.9 |
| 4476778  | 1772136  | 1148591  | 2038825  | 2092661  | 7440848  | 2715260  | 1143437  | 2445995  |
| 28481.52 | 19196.4  | 21592.92 | 20510.9  | 38356.23 | 61507.97 | 25639.47 | 30159.84 | 39219.29 |
| 5450.531 | 5365.747 | 3274.795 | 3304.289 | 0        | 0        | 23494.78 | 0        | 0        |
| 553448.9 | 441329.8 | 467742.7 | 506952.6 | 530091.6 | 725183.6 | 608341.6 | 686519.3 | 598367.6 |
| 732956.1 | 541859.5 | 611419.4 | 658475.1 | 728800.3 | 718359.6 | 650824.8 | 883561.6 | 676331.1 |
| 0        | 13341.73 | 18404.75 | 63253.34 | 14690.44 | 0        | 0        | 25757.04 | 0        |
| 14659.8  | 12317.86 | 17611.41 | 10920.83 | 14481.97 | 8528.432 | 24430.09 | 7923.943 | 18624.19 |
| 14559.84 | 10288.15 | 11347.08 | 13657.75 | 22553.12 | 0        | 9025.282 | 5124.491 | 50915.6  |
| 596717.4 | 2627121  | 1167753  | 4090763  | 2515349  | 1305017  | 11358810 | 1851987  | 1247906  |
| 993333.6 | 244105.5 | 0        | 0        | 0        | 0        | 0        | 1205562  | 0        |
| 5348931  | 5207154  | 5461708  | 5384281  | 6868924  | 7188159  | 6050126  | 6422357  | 6053859  |
| 0        | 3112.543 | 0        | 0        | 7942.639 | 39628.2  | 13581.27 | 6142.398 | 4418.445 |
| 4389903  | 4208919  | 3368002  | 3928568  | 5359299  | 5155058  | 4326407  | 5636009  | 5665136  |
| 59565.54 | 0        | 169017.9 | 190308.9 | 38918.34 | 0        | 0        | 0        | 180841   |
| 36621.36 | 41673.12 | 35500.63 | 10329    | 34085.44 | 24973.05 | 18210.03 | 16939.38 | 39981.88 |
| 3328728  | 2621580  | 2954384  | 2796462  | 2835635  | 2728911  | 2784884  | 4233363  | 3057608  |
| 226522.9 | 289400.9 | 734403.4 | 724503.1 | 2713515  | 1056819  | 482363.2 | 1587517  | 537466   |
| 9984896  | 10451950 | 7775463  | 10694559 | 14377791 | 12648583 | 8576385  | 13073743 | 6129115  |
| 12000413 | 9203298  | 24448056 | 10949610 | 24876686 | 2513887  | 27680754 | 9120496  | 13850633 |
| 815232.4 | 662759.6 | 2583620  | 926120.4 | 1465837  | 50888.73 | 1515589  | 1110763  | 998515.4 |
| 896333.1 | 526752   | 576737.3 | 1390023  | 890786.9 | 676745.2 | 1084403  | 854790.9 | 523210.8 |
| 719644.8 | 547833.4 | 690116.5 | 402675   | 291382.2 | 429811.8 | 386514.8 | 330862.7 | 744522   |
| 10022.77 | 884698   | 860557.3 | 8624440  | 277639.3 | 328107.5 | 320097.9 | 273053   | 407646.9 |
| 290066.9 | 104117.5 | 265609.2 | 131603.8 | 60227.09 | 178665   | 86231.35 | 80130.61 | 107913.6 |

|          |          |          |          |          |          |          |          |          |
|----------|----------|----------|----------|----------|----------|----------|----------|----------|
| 1142786  | 0        | 119581.9 | 1664474  | 1082870  | 4476661  | 4375159  | 1683832  | 0        |
| 37069528 | 14094434 | 48719668 | 40201964 | 17775184 | 25966506 | 10472871 | 24224236 | 26611300 |
| 6845331  | 4768147  | 4459225  | 3795290  | 5978345  | 6276775  | 5835348  | 5889117  | 8398462  |
| 170149.7 | 201672.4 | 269564.4 | 157556.5 | 88760.88 | 88569.44 | 152667.3 | 43942.6  | 145393   |
| 123796.2 | 225742.3 | 14939.76 | 49827.27 | 6835.985 | 77948.34 | 49405.02 | 55028.09 | 89006.41 |
| 355851.6 | 364100.4 | 460388.7 | 0        | 154071.3 | 211981.5 | 0        | 354282   | 385397.3 |
| 0        | 0        | 0        | 0        | 3181.369 | 3226.936 | 5418.756 | 5309.112 | 7529.481 |
| 12340.6  | 26351.17 | 8972.27  | 13321.67 | 17473.99 | 24016.98 | 10721.58 | 17122.35 | 15871.51 |
| 165677   | 364128.4 | 124654.4 | 242311.6 | 119901.1 | 386542.4 | 311062.4 | 72485.53 | 247440.3 |
| 0        | 10411.56 | 0        | 0        | 0        | 6651.063 | 0        | 18003.9  | 5520.204 |
| 9738.423 | 13750.43 | 13104.14 | 15287.35 | 11481.07 | 15785.1  | 11473.34 | 16857.4  | 15587.61 |
| 27729.12 | 444690.3 | 39915.74 | 48510.59 | 301480.4 | 571105.1 | 235531   | 667077.8 | 1206330  |
| 0        | 29985.46 | 23061.66 | 77101.09 | 65271.19 | 55362.84 | 41477.24 | 50956.81 | 112031.3 |
| 939320.9 | 832837.6 | 808266.1 | 932712.9 | 1202831  | 975674.6 | 864436.8 | 1186184  | 1040988  |
| 15301.11 | 8698.775 | 0        | 17578.29 | 20514.7  | 5194.609 | 9012.074 | 11800.47 | 9561.145 |
| 277805.2 | 12443.78 | 11813.25 | 19623.92 | 18607.45 | 35388.99 | 36744.6  | 15996    | 16410.66 |
| 10688.32 | 20109.51 | 18407.22 | 34042.63 | 12070.2  | 97210.06 | 0        | 664.774  | 4264.702 |
| 517189   | 675761.1 | 523270.2 | 582731.6 | 388435   | 354793.2 | 321903.9 | 440251.3 | 522910.9 |
| 129676.6 | 447490.9 | 425531.2 | 243766.5 | 184808.1 | 83353.86 | 134752.5 | 73514.99 | 94665.26 |
| 5238.615 | 619680.4 | 681835.1 | 577397.8 | 2876.227 | 4002.186 | 0        | 3150.366 | 6737.183 |
| 102541.8 | 31882.18 | 26793.14 | 32179.45 | 105361.3 | 50716.29 | 61918.9  | 50846.49 | 51534.87 |
| 835150.1 | 675226.3 | 1119561  | 693205.4 | 1354990  | 748114.4 | 1463251  | 972766   | 1406031  |
| 18373.26 | 13452.42 | 18249.54 | 5287.024 | 9133.228 | 9871.069 | 10605.64 | 18221.78 | 6970.51  |
| 3944024  | 3588814  | 3764121  | 6467153  | 3161112  | 3203496  | 3443741  | 3618278  | 4097968  |
| 7430997  | 8512700  | 6803849  | 7657296  | 7295447  | 7292449  | 7043257  | 6983737  | 8353534  |
| 21489.89 | 28512.15 | 0        | 32786    | 20727.34 | 0        | 0        | 121581.5 | 0        |
| 490045.8 | 462575.9 | 527110.3 | 759497.8 | 538987.1 | 594831.3 | 528796.9 | 589141.2 | 612369   |
| 2011.196 | 0        | 13169.96 | 7853.213 | 54738.74 | 345323.7 | 23238.23 | 2447.303 | 5911.181 |
| 734902.4 | 994040.9 | 796868.9 | 879373.7 | 904281.6 | 933961.7 | 871670.3 | 1180843  | 1259462  |
| 10172080 | 7385097  | 8922848  | 6027358  | 6002383  | 9084062  | 4233302  | 9636559  | 5077530  |
| 142838.8 | 190171.4 | 121138   | 92222.55 | 190765.1 | 189223.3 | 141130.7 | 241958.4 | 180294.4 |
| 0        | 0        | 3638.106 | 0        | 0        | 2358.875 | 0        | 2493.879 | 0        |
| 4888.604 | 3588.33  | 0        | 3420.681 | 9795.819 | 3869.787 | 7552.336 | 6536.745 | 3965.145 |
| 0        | 3914.239 | 0        | 0        | 7519.156 | 0        | 4656.345 | 5434.855 | 0        |
| 21853.46 | 24027.21 | 20383.68 | 27028.32 | 50804.76 | 18967.91 | 40546.09 | 25532.02 | 19509.7  |
| 0        | 62412.85 | 24582.21 | 16649.62 | 20502.82 | 0        | 14534.09 | 23167.08 | 78574.53 |
| 3922230  | 3305294  | 3139308  | 2943507  | 2650440  | 2739838  | 3127249  | 2394730  | 5226273  |
| 9884.241 | 10080.88 | 12180.62 | 7682.421 | 8470.74  | 7596.916 | 8002.272 | 10611.36 | 15143.92 |
| 874.543  | 731.8498 | 0        | 0        | 0        | 62608.1  | 0        | 2725.392 | 1027.57  |
| 62074.94 | 44268.24 | 48680.1  | 36204.72 | 55332.27 | 45840.62 | 51527.63 | 53160.94 | 72960.77 |
| 112414.7 | 138671.9 | 92014.93 | 109355.3 | 167469.8 | 84626.88 | 107919   | 117089.4 | 103768.5 |
| 20490.63 | 11302.94 | 20013.14 | 15572.18 | 20560.96 | 18059.85 | 25650.48 | 17453.77 | 13894.6  |
| 9390.045 | 132517.9 | 163951.3 | 113826.8 | 378458.9 | 520185.1 | 409747.9 | 328211.1 | 731653.4 |
| 1562162  | 1449214  | 1010610  | 1201979  | 904402.7 | 675478.3 | 1161721  | 1471570  | 1192921  |
| 18124.3  | 255283.1 | 18453.58 | 21834.14 | 116630.9 | 182806.8 | 74208.3  | 402075   | 349285.8 |
| 224279.5 | 234661.2 | 166422.3 | 168971.8 | 226467.2 | 165114   | 204985.5 | 169173.3 | 254981.2 |
| 2005846  | 2443098  | 2473184  | 2015152  | 2066041  | 2345967  | 2011525  | 2050222  | 2994489  |
| 81806.34 | 91161.97 | 81378.34 | 118995.3 | 101067.3 | 86494.12 | 78384.38 | 105399.1 | 95074.2  |
| 16507.39 | 7067.44  | 0        | 14676.54 | 7801.76  | 0        | 11002.89 | 6852.303 | 0        |
| 637432.9 | 804209.7 | 944607   | 933015.1 | 752440.9 | 1140373  | 718138.3 | 330046.1 | 510746.4 |
| 301490.9 | 172687.6 | 239665.4 | 291888.1 | 282915   | 173290.5 | 222612.7 | 267095.6 | 274112.3 |
| 0        | 0        | 0        | 0        | 0        | 0        | 10962.22 | 6412.614 | 0        |
| 444102.3 | 347759.7 | 361431.7 | 348598.9 | 345431.2 | 286899.6 | 280270.4 | 326373.8 | 434512.3 |
| 6550.146 | 3663.509 | 3664.691 | 1192.812 | 1751.302 | 819.3931 | 8304.718 | 3728.646 | 561.7101 |
| 60747.7  | 255527.6 | 57728.01 | 92391.46 | 204844.3 | 184085.4 | 175804.7 | 272921.8 | 120216.4 |
| 0        | 0        | 0        | 0        | 0        | 14767.44 | 0        | 9225.782 | 5622.498 |
| 1135895  | 802283   | 382919.1 | 896120.5 | 1232252  | 1311086  | 837600.6 | 1601871  | 1406078  |
| 0        | 0        | 0        | 0        | 7132.352 | 5216.069 | 0        | 0        | 18844.28 |

|          |          |          |          |          |          |          |          |          |
|----------|----------|----------|----------|----------|----------|----------|----------|----------|
| 348007.8 | 257886.2 | 228821.8 | 242331   | 282271.2 | 252162.2 | 253307.8 | 329577.2 | 258302   |
| 1036339  | 845359.1 | 647365   | 909282.9 | 1661065  | 1438720  | 1419798  | 1321739  | 685920   |
| 0        | 0        | 0        | 0        | 0        | 10135    | 6194.813 | 0        | 0        |
| 34081.49 | 6332.271 | 3204.508 | 18885.96 | 46072.59 | 36997.24 | 35288.26 | 11177.1  | 68693.55 |
| 0        | 2913.605 | 23411.95 | 0        | 326506.9 | 0        | 3220.876 | 6016.03  | 9296.032 |
| 19988.04 | 53175.58 | 58928.02 | 87548.97 | 78919.48 | 49151.96 | 72863.13 | 152557.3 | 75861.4  |
| 10123.22 | 0        | 3198.766 | 3743.391 | 16303.8  | 20053.67 | 3302.501 | 18431.12 | 12605.04 |
| 0        | 596477.5 | 220096.7 | 234268.9 | 1132772  | 1435338  | 732793.3 | 1149654  | 2318026  |
| 88403.66 | 55472.11 | 37131.34 | 36645.73 | 0        | 0        | 257963.2 | 0        | 46843.77 |
| 1406429  | 982076   | 1457225  | 1981909  | 1776983  | 2263536  | 847280.6 | 1983044  | 953440.9 |
| 1281885  | 1955907  | 1510786  | 1315592  | 428980.7 | 740761.1 | 1043525  | 989469.8 | 1218584  |
| 1774271  | 2040927  | 19477.88 | 8991.117 | 1158531  | 396107.7 | 49148.82 | 112923.9 | 457984.5 |
| 2380103  | 1098051  | 2441231  | 1209491  | 1259137  | 1247808  | 940727.4 | 0        | 1589301  |
| 128898.6 | 269083.2 | 431408.7 | 93580.39 | 66320.63 | 42417.51 | 67728.2  | 124293.9 | 48447.48 |
| 211419.8 | 288025.8 | 177712.7 | 142784.6 | 688151.6 | 520896.1 | 1073321  | 519260.2 | 1071297  |
| 18572.36 | 58488.79 | 256468.5 | 16101.4  | 7922.557 | 0        | 10528.08 | 0        | 62608.19 |
| 1933211  | 711771.8 | 791645.8 | 384241.7 | 548221.1 | 1072437  | 730115.5 | 496994   | 704956.4 |
| 237550.8 | 283769.3 | 397059.1 | 145871.6 | 150913.8 | 63110.59 | 110225.1 | 67715.28 | 131023.8 |
| 7556.134 | 1018425  | 912788.4 | 932356.8 | 461832.5 | 332858.9 | 176312.1 | 435219.3 | 453300.9 |
| 2022051  | 3973837  | 3227319  | 2529000  | 2136391  | 1257374  | 2734180  | 2160417  | 1792947  |
| 910342   | 884626.3 | 222943.7 | 115655.8 | 187800.9 | 316732.3 | 59735.02 | 965861.5 | 90453.36 |
| 249038.7 | 240390.2 | 495270.3 | 341767.1 | 90932.5  | 171503.9 | 136989.8 | 468635.5 | 200265.4 |
| 33160.28 | 0        | 11940.08 | 0        | 0        | 0        | 7289.893 | 0        | 126347.3 |
| 0        | 0        | 0        | 0        | 6695.997 | 2361.233 | 2523.708 | 3033.882 | 0        |
| 68298.27 | 83376.17 | 24804.8  | 57882.38 | 71906.01 | 96348.73 | 54070.43 | 50482.93 | 79280.44 |
| 250182.8 | 0        | 0        | 441718.7 | 23901.98 | 0        | 33171.72 | 0        | 0        |
| 168165.7 | 264147.6 | 241374.5 | 288256.2 | 20740.62 | 276947.8 | 53269.82 | 0        | 340243.7 |
| 634495.3 | 604547.9 | 335015.6 | 479189.2 | 384776.3 | 728854.8 | 545246.6 | 768300   | 662003.6 |
| 0        | 0        | 0        | 1374582  | 10682.14 | 0        | 12348.63 | 10515.41 | 6697.536 |
| 827764.3 | 786157.5 | 638092.3 | 705053.9 | 731645.3 | 576037.9 | 572032.3 | 827277.3 | 782488.6 |
| 12019.85 | 8706.514 | 11508.56 | 10794.29 | 0        | 10721.19 | 10644.77 | 12567.89 | 19439.27 |
| 17882.85 | 20649.65 | 24144.4  | 16414.09 | 32662.95 | 29536.74 | 34925.5  | 77543.47 | 30427.2  |
| 1180173  | 906515.7 | 974702   | 919342.8 | 834673.6 | 712191.8 | 774588.1 | 643577   | 1292517  |
| 45846.2  | 161372.6 | 14364.94 | 111564.6 | 99664.34 | 126394.5 | 26866.38 | 140999.2 | 90728.62 |
| 0        | 0        | 0        | 0        | 7570.35  | 0        | 4772.302 | 4757.436 | 0        |
| 418974.6 | 387951.5 | 368739   | 415663.6 | 275186.9 | 384502.8 | 180654.9 | 435598.2 | 337029.4 |
| 856258.9 | 125047.3 | 207938.8 | 228845.7 | 186584   | 211327   | 180356.5 | 671894.6 | 213842.8 |
| 169600   | 51643.08 | 160038.7 | 0        | 0        | 0        | 0        | 6293.028 | 0        |
| 335371   | 589450.3 | 238888.6 | 542691.6 | 1109306  | 448666.6 | 595131.1 | 554644.1 | 324299.5 |
| 377490.1 | 173533   | 1609951  | 1483354  | 102890.4 | 99162.97 | 1423608  | 434466.3 | 1226507  |
| 6859948  | 3419650  | 5178320  | 6293338  | 9075132  | 4205824  | 5602712  | 5842439  | 4658721  |
| 249782.4 | 598808.1 | 577298.3 | 283192.1 | 250128.5 | 76128.68 | 110377.9 | 103628.5 | 225993.7 |
| 0        | 985.0577 | 0        | 0        | 0        | 8397.022 | 505.8654 | 4830.356 | 15167.73 |
| 44529.37 | 52379.95 | 59311.34 | 59750.98 | 53550.94 | 90258.91 | 79668.52 | 34580.3  | 24163.03 |
| 595959.1 | 138058.8 | 329266   | 154300   | 81413.76 | 118620.5 | 57836.27 | 163646.1 | 194624.8 |
| 27602794 | 14349333 | 23144296 | 13063587 | 16776851 | 21088072 | 15853103 | 14094316 | 19173828 |
| 0        | 0        | 0        | 15174.08 | 20788.27 | 0        | 13068.5  | 0        | 13227.04 |
| 472771.3 | 362834.6 | 558898.2 | 274015.3 | 455506.2 | 449529.3 | 628004.9 | 417717.7 | 875108.4 |
| 2094044  | 2081356  | 3457484  | 1609554  | 1368389  | 2504094  | 2211164  | 1467350  | 1471163  |
| 1497643  | 1499618  | 3479723  | 4606483  | 1260805  | 1124510  | 760496.6 | 1834081  | 751137.1 |
| 326914.6 | 0        | 180433.4 | 128645.1 | 203707.4 | 239692   | 44346.06 | 0        | 455518.5 |
| 4814064  | 7209067  | 14508858 | 4456246  | 7421519  | 6398498  | 12595386 | 11943132 | 10229993 |
| 232530.9 | 190168.7 | 491610.5 | 108488.8 | 17189.15 | 22537.85 | 125594.4 | 15466.85 | 29008.02 |
| 250937.9 | 152395.3 | 331537.8 | 135605.7 | 175354.6 | 224864.7 | 203902.9 | 168564.4 | 161279.1 |
| 671268.4 | 794088.1 | 1354323  | 386650   | 747067.6 | 320336.6 | 1039853  | 559400.6 | 977848.3 |
| 1324028  | 975834.3 | 1451471  | 785683.1 | 1279155  | 816017.1 | 701125.7 | 1408048  | 809058.6 |
| 655739.5 | 472932.6 | 342509.3 | 465405.5 | 257754.1 | 221882.7 | 150700.9 | 192916.5 | 663437.3 |
| 459821.1 | 24324036 | 30216278 | 16134141 | 8230364  | 12188007 | 19262078 | 14392816 | 12587574 |

|          |          |          |          |          |          |          |          |          |
|----------|----------|----------|----------|----------|----------|----------|----------|----------|
| 799498.6 | 457335.8 | 1589287  | 382133.3 | 0        | 687779.7 | 1195095  | 1668270  | 603935.9 |
| 100080.3 | 110108.3 | 96809.52 | 104816.6 | 186953.7 | 85857.12 | 106903.4 | 65720.59 | 134450.9 |
| 97386.13 | 38022.9  | 129292.5 | 29463.79 | 15734.29 | 15721.73 | 56078    | 48935.87 | 63374.78 |
| 28682.41 | 23276.55 | 26477.64 | 23474.66 | 32181.65 | 27638.16 | 24117.66 | 33336.61 | 27357.41 |
| 0        | 142825.9 | 340676   | 148564.2 | 246197.1 | 143075.3 | 50303.87 | 216708.3 | 197760.9 |
| 0        | 0        | 11228.32 | 0        | 0        | 0        | 48568.52 | 33782.86 | 0        |
| 46011.32 | 62049.3  | 258612.4 | 36207.32 | 0        | 80740.26 | 134433.9 | 23672.14 | 71428.98 |
| 102310.7 | 99731.05 | 104085.5 | 79311.28 | 257465   | 148796.6 | 181914.4 | 249854.6 | 129240.9 |
| 55323.25 | 70607.16 | 51496.26 | 42889.77 | 0        | 0        | 0        | 26640.96 | 25317.43 |
| 40041.17 | 17605.17 | 16624.05 | 16521.49 | 79465.61 | 21691.64 | 66585.17 | 20941.33 | 105557   |
| 370689.1 | 2256545  | 649685.9 | 1910127  | 230205.4 | 856668.8 | 1496215  | 1322236  | 1104929  |
| 1213651  | 19271034 | 867902.2 | 7650791  | 10143779 | 16676315 | 15703297 | 16031192 | 14922334 |
| 25690142 | 19615932 | 26793544 | 27293264 | 12696882 | 13447563 | 14509647 | 12415588 | 3718949  |
| 355761.3 | 89033.29 | 167915.3 | 145675.9 | 100527   | 76409.68 | 50910.87 | 59237.89 | 65617.83 |
| 81847.75 | 78540.02 | 137412.2 | 67563.81 | 9571.027 | 14299.51 | 0        | 0        | 0        |
| 4315551  | 8592189  | 7826336  | 2722152  | 3249544  | 398570.8 | 4093486  | 610034.6 | 3251562  |
| 5272129  | 4653035  | 2736913  | 29332464 | 2418342  | 1195879  | 947255.1 | 3302829  | 2237289  |
| 212000.2 | 207528.2 | 508820.5 | 173395.9 | 288675.4 | 153572.8 | 139715.4 | 116247.4 | 143505.2 |
| 222870.3 | 180652.3 | 244723.3 | 246411.1 | 220918.6 | 542497.4 | 220162   | 186956.5 | 220138.5 |
| 16408.6  | 0        | 17475.08 | 0        | 45740.7  | 11065.31 | 0        | 0        | 0        |
| 17889.71 | 24656.13 | 0        | 19465.01 | 0        | 14435.24 | 15886.82 | 0        | 51954.53 |
| 349440.3 | 272625.9 | 661171.5 | 293629.5 | 81570.45 | 69380.92 | 126629.6 | 91493.2  | 79403.48 |
| 3132681  | 2850009  | 2747116  | 4162987  | 380103.8 | 233429.6 | 873127.7 | 1499936  | 2375697  |
| 33889.32 | 0        | 0        | 0        | 0        | 0        | 51895.59 | 0        | 0        |
| 34229.09 | 66650.5  | 29368.06 | 0        | 57201.86 | 30158.44 | 33770.95 | 49257.66 | 0        |
| 1190040  | 1166989  | 983486.1 | 587607.1 | 349401.9 | 875278.4 | 1086191  | 579867.8 | 1033097  |
| 290694.2 | 141788.2 | 200595.3 | 57509.06 | 0        | 108493.8 | 196704   | 171084.6 | 233095.2 |
| 1334643  | 2034101  | 2230254  | 1056123  | 273308.5 | 606197.5 | 652874.1 | 291626.4 | 1707947  |
| 700711.3 | 79782.32 | 315395.7 | 217007.7 | 120284.9 | 66781.79 | 91328.2  | 149933.2 | 194724.4 |
| 3066449  | 3000122  | 3318130  | 2171323  | 1573434  | 4818965  | 2137325  | 2454489  | 1986241  |
| 2743.568 | 2004.497 | 2066.808 | 0        | 2141.137 | 3303.531 | 3076.836 | 4808.58  | 5182.017 |
| 9342.743 | 29869.48 | 18671.98 | 12582.74 | 36380.95 | 22912.7  | 15559.57 | 29086.35 | 13632.72 |
| 25685.7  | 10980.04 | 16224.68 | 15535.89 | 5951.356 | 14136.02 | 14402.83 | 15324.27 | 24535.52 |
| 95833.84 | 22897.73 | 146325.6 | 66007    | 71010.06 | 37836.81 | 68988.21 | 58003.41 | 409490   |
| 1776411  | 442144.5 | 460289.4 | 524733.8 | 349029.8 | 709295.1 | 464502.6 | 233792.8 | 647780.4 |
| 91241.16 | 99633.06 | 100428.5 | 202340.3 | 63853.19 | 0        | 82706.52 | 0        | 155860   |
| 4231379  | 478154.7 | 184111.3 | 7333007  | 192685   | 132424.2 | 132672.5 | 138863.9 | 283005.5 |
| 0        | 0        | 0        | 0        | 23696.68 | 10974.62 | 7093.549 | 4336.19  | 4591.909 |
| 7380.643 | 15262.84 | 10621.68 | 9427.419 | 21093.1  | 9701.224 | 11783.29 | 6696.049 | 7351.392 |
| 1775374  | 2212946  | 975486.9 | 176947.6 | 197970.5 | 209577.5 | 375944.7 | 310322.1 | 260242.3 |
| 135274.9 | 123991   | 127340.2 | 79986.79 | 23397.99 | 115574.3 | 118047.9 | 49295.74 | 112398.1 |
| 6038346  | 403992.3 | 1014411  | 11787893 | 4875981  | 8251928  | 9081102  | 3118486  | 710237.4 |
| 51989.96 | 64712.48 | 83705.37 | 47565.39 | 49266.57 | 119360.3 | 64604.73 | 41502.62 | 62495.2  |
| 402705.6 | 220286.4 | 136756.8 | 444571.2 | 901531.8 | 1040082  | 259206.7 | 803369.2 | 249240.9 |
| 812620.6 | 2393460  | 2387440  | 858149.2 | 670619.9 | 119268.6 | 59875.53 | 1112740  | 1368990  |
| 18616.59 | 14769.64 | 16041.31 | 14648.64 | 20823.32 | 16038.92 | 16615.46 | 12770.79 | 19231.67 |
| 11514.35 | 10775.33 | 0        | 45132.69 | 64818.94 | 66548.07 | 40977.26 | 42440.65 | 58827.09 |
| 22627.45 | 24860.35 | 12429.51 | 9764.165 | 0        | 0        | 4949.023 | 25048.7  | 10452.02 |
| 40174.42 | 34591.36 | 28907.33 | 36373    | 0        | 0        | 0        | 0        | 0        |
| 12455.61 | 12548.92 | 48441.45 | 63165.44 | 26623.82 | 96453.12 | 56153.34 | 136911.3 | 65030.02 |
| 2828.324 | 3480.139 | 5141.953 | 2057.268 | 10851.21 | 10134.08 | 9302.169 | 6252.977 | 14853.18 |
| 635737.6 | 576688.6 | 809705.7 | 776807   | 990529.5 | 195369.3 | 1493716  | 1287165  | 1675829  |
| 69532.78 | 75966.2  | 76057.11 | 102347.5 | 91345.7  | 86753.27 | 0        | 81968.86 | 86204.07 |
| 17850.41 | 35018.86 | 35283.05 | 48635.14 | 3783.768 | 64363.58 | 55113.47 | 41576.04 | 28939.96 |
| 3861431  | 4274870  | 7610919  | 1566994  | 3446790  | 2753740  | 14269976 | 4032937  | 4710546  |
| 17007.95 | 10642.59 | 0        | 3281.653 | 20202.79 | 0        | 16243.6  | 18000.51 | 15387.04 |
| 1680005  | 4936052  | 1528290  | 1322634  | 1429740  | 1387524  | 1894682  | 720525.3 | 2021416  |
| 25247.92 | 166257.1 | 366315.3 | 23331.74 | 161363.4 | 137828.1 | 98823.82 | 101542.3 | 188037.3 |

|          |          |          |          |          |          |          |          |          |
|----------|----------|----------|----------|----------|----------|----------|----------|----------|
| 115360.3 | 15348.62 | 34856.64 | 164233.3 | 98615.49 | 144958   | 101841   | 50072.77 | 23725.41 |
| 49277456 | 44851480 | 52305948 | 42662932 | 26187924 | 14012930 | 24481088 | 12462757 | 26402090 |
| 185763.5 | 0        | 0        | 0        | 0        | 0        | 0        | 1139681  | 0        |
| 0        | 0        | 0        | 0        | 31722.75 | 0        | 23968.24 | 22204.27 | 95748.27 |
| 115984.1 | 110865   | 21777.95 | 143926.4 | 200447.6 | 143135.3 | 161769   | 203894.4 | 146325.6 |
| 5366.19  | 6263.516 | 5182.473 | 0        | 0        | 7707.877 | 5597.029 | 10860.53 | 8827.517 |
| 0        | 0        | 17008.18 | 0        | 0        | 10075.76 | 16688.06 | 8470.52  | 0        |
| 91231.35 | 61409.6  | 91603.66 | 65322.69 | 41248.38 | 49589.38 | 44978    | 95801.86 | 40821.67 |
| 482608.4 | 460144.6 | 770227.4 | 450978.2 | 167492.8 | 338482   | 287397.3 | 553575.4 | 369493.3 |
| 65983.23 | 62100.06 | 0        | 0        | 0        | 0        | 0        | 23116.66 | 49445.04 |
| 12678648 | 24870064 | 36144616 | 47688652 | 20876684 | 10394986 | 27764746 | 15392224 | 16895734 |
| 1853040  | 1818919  | 1425227  | 1319193  | 1672422  | 1612083  | 1775129  | 2126563  | 2209072  |
| 0        | 61143.18 | 25831.18 | 47254.78 | 70378.72 | 64324.44 | 53408.32 | 6465.572 | 55838.45 |
| 92960.68 | 23365.03 | 69877.19 | 52473.18 | 13730.53 | 24542.87 | 36828.63 | 30060.57 | 24288.79 |
| 15174.33 | 38997.97 | 54722.11 | 20675.32 | 42240.95 | 36201.85 | 28227.57 | 34313.11 | 12660    |
| 167271.1 | 0        | 0        | 0        | 0        | 259901.1 | 0        | 0        | 142600.5 |
| 0        | 10307.84 | 0        | 0        | 0        | 0        | 11714.29 | 0        | 0        |
| 35937.03 | 268498.9 | 0        | 477715.3 | 395531.6 | 38300.46 | 23849.74 | 307500.4 | 269123   |
| 91323.9  | 85794.61 | 56925.08 | 64032.88 | 98386.48 | 75634.98 | 61830.86 | 94958.47 | 49335.21 |
| 51351328 | 63148064 | 55763776 | 43309916 | 41532416 | 22769418 | 40786564 | 34323484 | 56725852 |
| 2039568  | 4176306  | 4274996  | 2689749  | 2869477  | 3585987  | 2589647  | 2497340  | 2175154  |
| 0        | 0        | 0        | 0        | 0        | 2327847  | 3337001  | 2390819  | 2601625  |
| 180012.5 | 175013   | 168260.8 | 145795.1 | 172091.6 | 192898.2 | 205692.3 | 164755.5 | 190599.3 |
| 292129.2 | 235898   | 209240.1 | 166589.2 | 238111.1 | 392682.9 | 202476.2 | 211001.4 | 257037.5 |
| 87128.54 | 57453    | 19659.2  | 75288.33 | 52566.68 | 20157.27 | 30144.18 | 30351.02 | 49829.64 |
| 24908.92 | 0        | 0        | 0        | 0        | 4087.551 | 0        | 13395.72 | 0        |
| 98695.88 | 214940.8 | 78939.19 | 54868.67 | 23997.7  | 38714.15 | 37429.63 | 45269.45 | 42372.2  |
| 0        | 343635.1 | 356067.6 | 167172.2 | 0        | 75712.27 | 98724.24 | 0        | 203620.8 |
| 352205.3 | 72090.01 | 814582   | 39323.65 | 130701.4 | 290318.7 | 308755.7 | 192242.5 | 184367.5 |
| 244008.2 | 97110.39 | 137243.6 | 35932.63 | 65436    | 0        | 164430.4 | 76667.02 | 302057.8 |
| 1375164  | 750605.5 | 1863866  | 826276.6 | 928811.3 | 949105.2 | 1374882  | 1021958  | 1261467  |
| 1217068  | 1538261  | 958250.1 | 885967.1 | 1350315  | 1366924  | 1335830  | 1568734  | 1350166  |
| 3040729  | 5479166  | 3662202  | 2911505  | 1910734  | 4262992  | 5729903  | 4807327  | 3149948  |
| 2166051  | 1670669  | 2097019  | 1972051  | 195930.2 | 172489.9 | 207290.4 | 120658.8 | 625987.2 |
| 1122793  | 1118947  | 1132786  | 893564.1 | 511864.7 | 496532.7 | 499089.8 | 573859.2 | 644542.1 |
| 376936.7 | 1707665  | 1480927  | 681867.3 | 175524.7 | 726226   | 935524.6 | 1026591  | 1781642  |
| 1670833  | 1728535  | 2689729  | 1663869  | 1274394  | 2007911  | 2123758  | 1756859  | 2208763  |
| 39245.06 | 103351.4 | 111693.8 | 30061.59 | 45409.36 | 40255.43 | 31015.32 | 43544.51 | 63581.34 |
| 11486.41 | 57386.11 | 95839.42 | 0        | 0        | 0        | 25650.23 | 10671.18 | 0        |
| 125570.2 | 154169.2 | 533576.6 | 212059.7 | 246928.7 | 188114.9 | 94801.63 | 82629.32 | 225515.9 |
| 0        | 0        | 18409.19 | 0        | 0        | 0        | 18400.9  | 0        | 0        |
| 132193.6 | 669775.9 | 316899.8 | 740126.3 | 500536.1 | 0        | 0        | 0        | 0        |
| 0        | 4048.64  | 7284.046 | 0        | 10355.51 | 3414.758 | 15797.28 | 5957.051 | 0        |
| 1050780  | 1668119  | 1644637  | 1044148  | 964246.7 | 375434.7 | 987272.6 | 258092   | 763896   |
| 0        | 0        | 0        | 0        | 0        | 25318.54 | 21058.88 | 21222.1  | 36441.21 |
| 112201.8 | 122904.2 | 124946.8 | 100689   | 136509.2 | 144158.6 | 233467.1 | 138269.4 | 100589.7 |
| 2395339  | 1408261  | 2931985  | 2268646  | 1354421  | 1962579  | 1689466  | 2018785  | 2331130  |
| 127512.7 | 125805.8 | 163715.8 | 105746.4 | 97396.55 | 174447.8 | 40360.58 | 59716.27 | 92074.48 |
| 412852.4 | 195554   | 199025.1 | 345841.9 | 215178.6 | 149601.5 | 459908   | 245553.7 | 353976.4 |
| 152300.2 | 193897.6 | 352181.9 | 234888.1 | 441221.2 | 167682.9 | 234660.8 | 217237.3 | 313678.1 |
| 35908.04 | 30314.42 | 62557.73 | 281933.3 | 7621.879 | 16727.91 | 32013.64 | 66314.56 | 26901.99 |
| 4601853  | 1495055  | 4863637  | 2626006  | 76978.04 | 912270.9 | 25749138 | 1158552  | 68326    |
| 22587836 | 167465.4 | 18446794 | 17025530 | 4528514  | 389781.2 | 114476.7 | 399227.5 | 17317674 |
| 5208674  | 4553355  | 6055957  | 3039556  | 1583238  | 1335141  | 1819890  | 1221009  | 1948990  |
| 3430230  | 2694045  | 6725587  | 2031765  | 1871176  | 4713434  | 3096350  | 2605087  | 4101843  |
| 4747430  | 3497341  | 5019307  | 2461149  | 3098646  | 3446138  | 4323242  | 4135437  | 4431160  |
| 10824.22 | 7412.334 | 46298.71 | 18346.73 | 9438.271 | 0        | 0        | 0        | 12366.91 |
| 122281.9 | 96300.76 | 161458.6 | 94671.05 | 26184.63 | 0        | 0        | 83324.72 | 11385.4  |

|          |          |          |          |          |          |          |          |          |
|----------|----------|----------|----------|----------|----------|----------|----------|----------|
| 12540302 | 12178675 | 18106924 | 9027316  | 9206396  | 7676975  | 8214846  | 7101843  | 11343017 |
| 57027.84 | 90014.06 | 48382.17 | 42179.07 | 15151.92 | 35463.06 | 61091.13 | 36256.74 | 50624.5  |
| 0        | 0        | 82924.93 | 75096.61 | 51374.16 | 25420.57 | 27392.34 | 0        | 0        |
| 6.34E+08 | 6.17E+08 | 8.2E+08  | 4.72E+08 | 4.13E+08 | 4.54E+08 | 4.82E+08 | 4.07E+08 | 4.69E+08 |
| 18700388 | 17123442 | 13578882 | 15999040 | 18075484 | 19494704 | 16031675 | 15202255 | 16619845 |
| 23449.73 | 17485.23 | 11253.92 | 24064.83 | 0        | 0        | 0        | 0        | 0        |



| C6       | C7       | C8       | C9       | C10      | S.vs.C FC | S.vs.C Pval | S.vs.C log2 | S.vs.C Sig  |
|----------|----------|----------|----------|----------|-----------|-------------|-------------|-------------|
| 8684.369 | 15289.57 | 11619.21 | 9458.52  | 16049    | 8.720821  | 0.360317    | 3.124464    | Nonsignifi  |
| 15231.15 | 11287.6  | 16219.46 | 18252.82 | 14701.48 | 1.160797  | 0.282186    | 0.215116    | Nonsignifi  |
| 84178.88 | 52533.17 | 44848.7  | 96717.7  | 58154.03 | 0.913678  | 0.510248    | -0.13024    | Nonsignifi  |
| 21481.24 | 25656.18 | 25262.98 | 0        | 19665.31 | 1.458053  | 0.097166    | 0.544043    | Nonsignifi  |
| 0        | 0        | 0        | 0        | 72567.62 | 1.13083   | 0.78383     | 0.177383    | Nonsignifi  |
| 6126496  | 6300067  | 5909849  | 7817058  | 5693219  | 0.895283  | 0.223762    | -0.15958    | Nonsignifi  |
| 13544677 | 9644166  | 10313635 | 10697429 | 10197802 | 0.807739  | 0.055103    | -0.30804    | Nonsignifi  |
| 7248.211 | 3566.117 | 6906.24  | 0        | 4857.92  | 1.440668  | 0.249086    | 0.526738    | Nonsignifi  |
| 0        | 40093.04 | 6210.178 | 0        | 0        | 0.565015  | 0.22831     | -0.82364    | Nonsignifi  |
| 470038.7 | 428479   | 343829.3 | 300434.6 | 318030   | 0.785457  | 0.023656    | -0.3484     | Nonsignifi  |
| 6550.004 | 5032.722 | 7703.004 | 4658.355 | 8224.801 | 1.004845  | 0.989388    | 0.006973    | Nonsignifi  |
| 69883.1  | 52234.18 | 55938.23 | 29152.71 | 59263.73 | 0.896516  | 0.362987    | -0.1576     | Nonsignifi  |
| 0        | 40955.05 | 231936.5 | 0        | 90928.34 | 0.997002  | 0.996298    | -0.00433    | Nonsignifi  |
| 655923.4 | 572074.4 | 503825.9 | 660151.7 | 482370.6 | 1.029872  | 0.699427    | 0.042465    | Nonsignifi  |
| 21105.28 | 10858.86 | 0        | 12205.51 | 2747.329 | 1.900642  | 0.022509    | 0.926487    | Significant |
| 1.04E+08 | 93265488 | 60499940 | 74442720 | 68851656 | 0.945699  | 0.68265     | -0.08055    | Nonsignifi  |
| 0        | 12742.5  | 11665.98 | 0        | 13963.59 | 0.97863   | 0.932269    | -0.03116    | Nonsignifi  |
| 71462.73 | 0        | 72023.7  | 81284.38 | 50927.41 | 0.933916  | 0.793623    | -0.09864    | Nonsignifi  |
| 7921.41  | 11416.15 | 12780.26 | 9341.599 | 13417.46 | 0.514447  | 0.00563     | -0.9589     | Significant |
| 6328814  | 3354197  | 3533569  | 7181652  | 3748033  | 1.025641  | 0.880476    | 0.036526    | Nonsignifi  |
| 6825.137 | 7261.528 | 4991.896 | 9061.263 | 3010.692 | 1.432364  | 0.292946    | 0.518398    | Nonsignifi  |
| 25543.81 | 139460.2 | 0        | 0        | 263472.2 | 1.482046  | 0.500996    | 0.56759     | Nonsignifi  |
| 720988.1 | 868497.4 | 1411010  | 748775   | 1146571  | 0.908906  | 0.304876    | -0.1378     | Nonsignifi  |
| 0        | 9814.599 | 0        | 0        | 26449.08 | 0.689458  | 0.765818    | -0.53647    | Nonsignifi  |
| 31379.69 | 51101.88 | 49665.45 | 19079.28 | 11026.02 | 1.185047  | 0.675226    | 0.244944    | Nonsignifi  |
| 29385.33 | 20421.31 | 80137.84 | 18228.29 | 36110.7  | 1.115642  | 0.669596    | 0.157874    | Nonsignifi  |
| 406374.1 | 382130.1 | 259618.8 | 325151.5 | 243586.3 | 0.901918  | 0.247241    | -0.14893    | Nonsignifi  |
| 0        | 0        | 0        | 0        | 0        | 0.920413  | 0.960253    | -0.11965    | Nonsignifi  |
| 829586.7 | 641656.6 | 848303.6 | 396667.8 | 764194.1 | 0.980319  | 0.825574    | -0.02868    | Nonsignifi  |
| 109783.4 | 64887.72 | 130810   | 175937.7 | 94496.29 | 0.998314  | 0.988981    | -0.00243    | Nonsignifi  |
| 38072864 | 18268990 | 40187504 | 33167360 | 31413242 | 0.888337  | 0.420176    | -0.17082    | Nonsignifi  |
| 8802.78  | 0        | 8517.215 | 5038.675 | 37465.92 | 1.26682   | 0.61997     | 0.341211    | Nonsignifi  |
| 7245.052 | 6954.952 | 14940.45 | 0        | 11207.04 | 1.447252  | 0.193597    | 0.533316    | Nonsignifi  |
| 17820.66 | 0        | 15854.99 | 15599.66 | 0        | 1.286109  | 0.164516    | 0.363013    | Nonsignifi  |
| 0        | 29346.86 | 20200.72 | 23380.43 | 30150.63 | 1.408037  | 0.034271    | 0.493685    | Nonsignifi  |
| 8652.017 | 0        | 10538.9  | 9618.967 | 11959.69 | 76.23518  | 0.344131    | 6.252385    | Nonsignifi  |
| 7194.521 | 5894.816 | 5984.109 | 3186.862 | 5602.74  | 0.890086  | 0.589014    | -0.16798    | Nonsignifi  |
| 88615.55 | 140165.2 | 123263.3 | 67715.87 | 96223.73 | 2.092054  | 0.203945    | 1.06492     | Nonsignifi  |
| 11254.2  | 9598.742 | 8638.446 | 11011.2  | 9805.049 | 1.323626  | 0.467083    | 0.404495    | Nonsignifi  |
| 0        | 67986.39 | 113349.5 | 38391.49 | 59652.35 | 1.722684  | 0.130402    | 0.784658    | Nonsignifi  |
| 127110.9 | 48388.79 | 48622.55 | 72782.71 | 36096.06 | 1.005237  | 0.976427    | 0.007536    | Nonsignifi  |
| 11149385 | 10570835 | 10115823 | 13097898 | 8777377  | 1.012933  | 0.857042    | 0.018539    | Nonsignifi  |
| 12126.68 | 13143.1  | 5151.615 | 0        | 5413.542 | 5.340723  | 0.355121    | 2.417035    | Nonsignifi  |
| 17380.11 | 26020.9  | 17271.67 | 33329.34 | 40493.08 | 1.248814  | 0.427546    | 0.320559    | Nonsignifi  |
| 179892   | 204256.2 | 378759.6 | 206702.5 | 222354.1 | 0.99118   | 0.950243    | -0.01278    | Nonsignifi  |
| 1015998  | 1165516  | 899404.8 | 1117907  | 1459178  | 0.760527  | 0.011314    | -0.39493    | Nonsignifi  |
| 9140.26  | 6986.246 | 17456.61 | 10598.58 | 7450.204 | 1.229878  | 0.395931    | 0.298515    | Nonsignifi  |
| 2064294  | 1775982  | 1469108  | 1826295  | 1673790  | 1.095647  | 0.405834    | 0.131783    | Nonsignifi  |
| 2043949  | 1954374  | 1362801  | 1807759  | 1918229  | 0.983293  | 0.895418    | -0.02431    | Nonsignifi  |
| 78947.98 | 82266.09 | 139442.9 | 60190.26 | 119831.4 | 0.910742  | 0.455618    | -0.13489    | Nonsignifi  |
| 2086.177 | 0        | 11557.62 | 5774.136 | 6257.57  | 0.75948   | 0.690593    | -0.39692    | Nonsignifi  |
| 24961.6  | 26191.77 | 16516.92 | 30149.54 | 29092.2  | 0.952331  | 0.727643    | -0.07047    | Nonsignifi  |
| 56040.03 | 0        | 7002.742 | 42476.15 | 2065.24  | 0.475106  | 0.206611    | -1.07368    | Nonsignifi  |
| 10339.81 | 3418.579 | 0        | 14417.01 | 7971.444 | 0.600523  | 0.498836    | -0.73571    | Nonsignifi  |
| 29229.33 | 101930.4 | 0        | 34337.25 | 18855.94 | 0.906158  | 0.832016    | -0.14216    | Nonsignifi  |
| 0        | 0        | 0        | 0        | 5691.417 | 0.913739  | 0.847427    | -0.13015    | Nonsignifi  |
| 7109.777 | 14351.31 | 6851.277 | 7256.044 | 15743.42 | 1.599068  | 0.018105    | 0.677231    | Significant |

|          |          |          |          |          |          |          |          |            |
|----------|----------|----------|----------|----------|----------|----------|----------|------------|
| 0        | 7534.755 | 9727.406 | 0        | 16402.89 | 1.217536 | 0.269039 | 0.283965 | Nonsignifi |
| 42577.9  | 34871.15 | 44237.89 | 54815.46 | 38579.02 | 0.957356 | 0.600704 | -0.06287 | Nonsignifi |
| 9761.69  | 11826    | 0        | 12800.59 | 8440.398 | 1.815437 | 0.007594 | 0.860317 | Significan |
| 4824.046 | 12191.47 | 0        | 0        | 14111.87 | 0.58383  | 0.228861 | -0.77638 | Nonsignifi |
| 11789984 | 11299841 | 12968596 | 8975945  | 14221821 | 1.202683 | 0.176871 | 0.266256 | Nonsignifi |
| 340204.2 | 708916.7 | 228649.8 | 340600.8 | 864372.9 | 1.07757  | 0.758263 | 0.107781 | Nonsignifi |
| 29208.66 | 44319.95 | 83924.16 | 76616.2  | 109798.9 | 1.144109 | 0.521095 | 0.194224 | Nonsignifi |
| 320307.3 | 377051.1 | 343276.6 | 419596.2 | 842833.9 | 1.204561 | 0.688778 | 0.268507 | Nonsignifi |
| 212260.3 | 220161.3 | 238357.1 | 178155.6 | 283420.1 | 1.233561 | 0.068616 | 0.30283  | Nonsignifi |
| 179612.9 | 67814.05 | 259213.3 | 214917.3 | 158027.7 | 1.363956 | 0.06208  | 0.447797 | Nonsignifi |
| 1406064  | 2408991  | 5498999  | 4638708  | 4274300  | 0.639704 | 0.020188 | -0.64452 | Significan |
| 413905.4 | 389078.4 | 1643282  | 968721.9 | 1382605  | 1.456794 | 0.242831 | 0.542797 | Nonsignifi |
| 0        | 55813.2  | 34963.12 | 26569.78 | 91425.1  | 1.09454  | 0.833688 | 0.130325 | Nonsignifi |
| 499042.1 | 78588.55 | 581323.4 | 151962.9 | 1184950  | 0.79073  | 0.580448 | -0.33874 | Nonsignifi |
| 84813.95 | 71622.38 | 58686.64 | 65691.2  | 111471.2 | 0.705166 | 0.32666  | -0.50396 | Nonsignifi |
| 425894.8 | 685000.1 | 510012.3 | 661360.8 | 685449   | 1.446997 | 0.044276 | 0.533062 | Nonsignifi |
| 2709466  | 3223728  | 1920325  | 2754881  | 519286.7 | 0.615705 | 0.128413 | -0.69969 | Nonsignifi |
| 93841.4  | 132968.6 | 184175.6 | 94939.76 | 150595.1 | 1.569008 | 0.089057 | 0.649853 | Nonsignifi |
| 98931.55 | 37427.2  | 157672   | 15270.6  | 169552   | 1.844363 | 0.286126 | 0.883123 | Nonsignifi |
| 1440515  | 734794.1 | 898244.6 | 503752.9 | 1710051  | 0.752939 | 0.340745 | -0.4094  | Nonsignifi |
| 15804.69 | 3798553  | 0        | 1582377  | 0        | 0.154473 | 0.047865 | -2.69457 | Significan |
| 86681.04 | 33022.02 | 16209.19 | 31508.53 | 222994.2 | 0.966821 | 0.93799  | -0.04868 | Nonsignifi |
| 298368.4 | 605163.1 | 241138.3 | 332306.1 | 366312.4 | 1.167008 | 0.374226 | 0.222815 | Nonsignifi |
| 99324.27 | 50058.68 | 364003.6 | 140902.8 | 1436823  | 0.796316 | 0.683846 | -0.32859 | Nonsignifi |
| 2375433  | 1377994  | 794364.8 | 2014643  | 1852908  | 1.49967  | 0.038293 | 0.584646 | Nonsignifi |
| 0        | 9422.396 | 35829.53 | 0        | 32583.85 | 0.762352 | 0.427082 | -0.39147 | Nonsignifi |
| 72947.3  | 84212.71 | 65939.45 | 58055.98 | 31216.36 | 0.829955 | 0.510607 | -0.26889 | Nonsignifi |
| 182473.9 | 82613.65 | 78132.41 | 315095.2 | 68044.44 | 1.235619 | 0.423897 | 0.305233 | Nonsignifi |
| 0        | 0        | 0        | 0        | 43237.57 | 0.417317 | 0.36439  | -1.26079 | Nonsignifi |
| 0        | 277964.8 | 5100.979 | 7611.872 | 389898.2 | 1.600861 | 0.248835 | 0.678848 | Nonsignifi |
| 418355.7 | 544512.7 | 672150.9 | 501940   | 596356.6 | 1.182839 | 0.342349 | 0.242254 | Nonsignifi |
| 45356.42 | 64307.67 | 37992.83 | 155487   | 12745.68 | 1.107485 | 0.788731 | 0.147288 | Nonsignifi |
| 138811.3 | 191385.4 | 235542.1 | 182750.9 | 203579   | 1.395135 | 0.070823 | 0.480404 | Nonsignifi |
| 744023.9 | 807641.5 | 1914501  | 1012483  | 1106745  | 0.827796 | 0.412724 | -0.27265 | Nonsignifi |
| 68621.74 | 214082.3 | 246689.4 | 95731.27 | 228483   | 1.571016 | 0.083146 | 0.651698 | Nonsignifi |
| 346858.6 | 334227   | 348188.3 | 454553.9 | 305781.7 | 0.976351 | 0.746879 | -0.03453 | Nonsignifi |
| 729260.8 | 1713632  | 957535.4 | 1106657  | 1161552  | 1.044306 | 0.706785 | 0.062544 | Nonsignifi |
| 144030.1 | 281645.9 | 99648.03 | 0        | 195110.3 | 0.99126  | 0.969653 | -0.01266 | Nonsignifi |
| 3866.626 | 0        | 5418.052 | 7170.736 | 0        | 3.883166 | 0.291941 | 1.957234 | Nonsignifi |
| 10211.96 | 0        | 13316.57 | 0        | 9838.974 | 0.771663 | 0.111772 | -0.37396 | Nonsignifi |
| 18077.03 | 13762.65 | 15815.94 | 13149.98 | 8196.086 | 1.191887 | 0.346095 | 0.253248 | Nonsignifi |
| 8977.58  | 137888.6 | 6330.185 | 9114.848 | 5929.046 | 0.620924 | 0.563559 | -0.68751 | Nonsignifi |
| 13605.66 | 532220.8 | 0        | 0        | 457115.7 | 0.129154 | 0.090001 | -2.95283 | Nonsignifi |
| 14571.69 | 0        | 0        | 0        | 0        | 33.19594 | 0.188131 | 5.052935 | Nonsignifi |
| 47048.82 | 23824.8  | 21857.98 | 35781.74 | 37348.43 | 0.948851 | 0.638112 | -0.07575 | Nonsignifi |
| 94083.48 | 79655.48 | 16508.94 | 148441.7 | 35222.8  | 1.025494 | 0.914563 | 0.036319 | Nonsignifi |
| 0        | 0        | 0        | 15805.79 | 0        | 0.94833  | 0.822891 | -0.07654 | Nonsignifi |
| 225997.2 | 306392.6 | 299350.3 | 410375.5 | 260828.8 | 1.14047  | 0.202091 | 0.189628 | Nonsignifi |
| 5537.351 | 44070.09 | 56634.42 | 6556.387 | 46326.36 | 0.70183  | 0.440184 | -0.51081 | Nonsignifi |
| 45009.76 | 28055.02 | 38318.17 | 23058.03 | 26619.46 | 0.879788 | 0.272156 | -0.18477 | Nonsignifi |
| 330990.6 | 259834.2 | 240440.7 | 433138.6 | 259671.6 | 1.064697 | 0.521028 | 0.090442 | Nonsignifi |
| 0        | 0        | 342582.4 | 310331.9 | 697324.3 | 1.515804 | 0.278248 | 0.600083 | Nonsignifi |
| 87449.41 | 107316   | 56338.77 | 108267.9 | 58998.55 | 1.507905 | 0.149453 | 0.592546 | Nonsignifi |
| 438681.4 | 335034.5 | 1521577  | 729310.9 | 674638   | 2.309409 | 0.101703 | 1.207524 | Nonsignifi |
| 25246778 | 22490648 | 18260764 | 27817334 | 18690080 | 0.894714 | 0.36108  | -0.1605  | Nonsignifi |
| 18568.34 | 19989.7  | 42158.03 | 3694.375 | 52741.24 | 0.915965 | 0.79398  | -0.12664 | Nonsignifi |
| 4378.162 | 4226.109 | 6782.759 | 20511.48 | 468089.8 | 1.15675  | 0.878377 | 0.210077 | Nonsignifi |
| 34175836 | 10533063 | 12797.29 | 0        | 2179572  | 1.332222 | 0.677181 | 0.413835 | Nonsignifi |

|          |          |          |          |          |          |          |          |            |
|----------|----------|----------|----------|----------|----------|----------|----------|------------|
| 878428.6 | 1018341  | 1836788  | 1402774  | 1900843  | 1.189653 | 0.549831 | 0.25054  | Nonsignifi |
| 434407.3 | 634830.9 | 458721   | 119358.3 | 522162.3 | 1.258988 | 0.189545 | 0.332264 | Nonsignifi |
| 811469.3 | 2337016  | 1755776  | 1420205  | 4911375  | 1.016109 | 0.961967 | 0.023055 | Nonsignifi |
| 53128.87 | 79086.44 | 37883.73 | 28752.16 | 65611.53 | 0.898439 | 0.538647 | -0.15451 | Nonsignifi |
| 72022.84 | 208706.2 | 121827.4 | 64489.7  | 65559.06 | 0.989929 | 0.962832 | -0.0146  | Nonsignifi |
| 2426985  | 3642194  | 2840306  | 2926059  | 3445727  | 1.101949 | 0.481333 | 0.140058 | Nonsignifi |
| 175824   | 224900   | 0        | 0        | 314645.6 | 1.376195 | 0.085572 | 0.460685 | Nonsignifi |
| 206001.7 | 23814.31 | 191082.2 | 250664   | 27691.87 | 1.353751 | 0.386194 | 0.436963 | Nonsignifi |
| 587600.6 | 707345.4 | 1016156  | 664453.6 | 1106138  | 1.281598 | 0.173277 | 0.357944 | Nonsignifi |
| 11686040 | 14236519 | 16780944 | 13624297 | 22385430 | 1.219584 | 0.289899 | 0.286389 | Nonsignifi |
| 57426.09 | 68361.48 | 48120.34 | 146511.7 | 523701.1 | 0.748204 | 0.543957 | -0.4185  | Nonsignifi |
| 55198.57 | 192845.1 | 99176.17 | 75477.69 | 151110.6 | 1.656101 | 0.210015 | 0.727791 | Nonsignifi |
| 231871.2 | 94515.31 | 219038.3 | 28922.83 | 0        | 0.671838 | 0.335177 | -0.57381 | Nonsignifi |
| 11253.78 | 13767.34 | 8734.775 | 14154.94 | 8122.367 | 0.835493 | 0.445069 | -0.2593  | Nonsignifi |
| 37027.83 | 48661.76 | 31387.49 | 55288.01 | 35968.44 | 0.948406 | 0.748465 | -0.07642 | Nonsignifi |
| 59664.05 | 73546.51 | 36091.34 | 81665.09 | 54647.62 | 0.966546 | 0.811181 | -0.04909 | Nonsignifi |
| 2999152  | 8062850  | 7554097  | 4620035  | 6175999  | 1.530345 | 0.264074 | 0.613857 | Nonsignifi |
| 210417.7 | 209535.6 | 0        | 74240.13 | 211560.8 | 1.191888 | 0.474638 | 0.253249 | Nonsignifi |
| 185040.2 | 41367.76 | 302153.6 | 88113.09 | 168160   | 1.028145 | 0.934644 | 0.040043 | Nonsignifi |
| 31641.93 | 20120.03 | 7562.643 | 19007.44 | 3992.651 | 1.35023  | 0.390041 | 0.433205 | Nonsignifi |
| 6131847  | 3223082  | 2816751  | 2719143  | 3452981  | 0.92696  | 0.668588 | -0.10942 | Nonsignifi |
| 344567.1 | 406225.4 | 367414.1 | 215526.9 | 464996.1 | 1.091584 | 0.497418 | 0.126423 | Nonsignifi |
| 0        | 138935.7 | 231954.7 | 0        | 35018.99 | 0.970521 | 0.971113 | -0.04317 | Nonsignifi |
| 165003.7 | 25081.21 | 52090.48 | 432517.6 | 1181484  | 0.88792  | 0.816293 | -0.1715  | Nonsignifi |
| 2303145  | 2775768  | 6315888  | 2680451  | 4973758  | 1.009799 | 0.961539 | 0.014069 | Nonsignifi |
| 455118.5 | 244840.2 | 156296.9 | 355087.1 | 185038.7 | 0.497059 | 0.067024 | -1.00851 | Nonsignifi |
| 37853.05 | 23296.69 | 43741.61 | 34336.3  | 29213.66 | 0.954437 | 0.68949  | -0.06728 | Nonsignifi |
| 62990.56 | 55885.22 | 112169.5 | 82603.81 | 70901.93 | 0.903894 | 0.605081 | -0.14578 | Nonsignifi |
| 1113239  | 1739364  | 2008507  | 1295615  | 2863344  | 1.236842 | 0.216022 | 0.306662 | Nonsignifi |
| 0        | 0        | 37243.66 | 12818.84 | 33697.93 | 1.535928 | 0.112375 | 0.61911  | Nonsignifi |
| 822445.3 | 1063939  | 1628040  | 141458.7 | 1598054  | 0.974458 | 0.919222 | -0.03733 | Nonsignifi |
| 154841.8 | 110910   | 106733.1 | 30355.6  | 89851.62 | 1.367009 | 0.197369 | 0.451022 | Nonsignifi |
| 142461.1 | 94515.31 | 219038.3 | 28936.56 | 0        | 0.644806 | 0.205882 | -0.63306 | Nonsignifi |
| 0        | 95962.23 | 7191.12  | 27388.82 | 84756.7  | 0.51964  | 0.117155 | -0.94442 | Nonsignifi |
| 403376.6 | 877113   | 4613206  | 611549.1 | 1338628  | 0.66957  | 0.221168 | -0.57869 | Nonsignifi |
| 50369.71 | 62859.03 | 40618.29 | 44107.43 | 79851.06 | 1.302294 | 0.186146 | 0.381055 | Nonsignifi |
| 48853.16 | 0        | 0        | 0        | 0        | 0.883249 | 0.824662 | -0.17911 | Nonsignifi |
| 8140.41  | 12837.8  | 6165.854 | 15453.1  | 0        | 2.078704 | 0.150026 | 1.055684 | Nonsignifi |
| 1705859  | 1969420  | 1569123  | 1812835  | 4731805  | 0.681863 | 0.193902 | -0.55245 | Nonsignifi |
| 2000651  | 936382.8 | 1663581  | 577267.8 | 1111920  | 0.714198 | 0.186784 | -0.4856  | Nonsignifi |
| 97478.61 | 203144.3 | 310612.9 | 144585   | 105646.8 | 1.495825 | 0.136355 | 0.580941 | Nonsignifi |
| 55678.48 | 26968.55 | 40543.84 | 47768.96 | 45156.72 | 1.126211 | 0.487617 | 0.171477 | Nonsignifi |
| 180501.3 | 103957.4 | 121986   | 131476.2 | 144620.2 | 1.022613 | 0.815867 | 0.032261 | Nonsignifi |
| 62060.36 | 76544.25 | 19128.39 | 0        | 150513.5 | 1.702292 | 0.152061 | 0.767479 | Nonsignifi |
| 246170.5 | 377877.5 | 241726.7 | 146390.8 | 1190036  | 0.847637 | 0.702267 | -0.23848 | Nonsignifi |
| 0        | 0        | 22658.49 | 0        | 0        | 1.717659 | 0.277561 | 0.780444 | Nonsignifi |
| 7228828  | 5000837  | 6535541  | 6067541  | 5384404  | 0.7126   | 0.02582  | -0.48884 | Nonsignifi |
| 62995.02 | 47157.09 | 46439.91 | 61316.66 | 60005.62 | 1.21245  | 0.070938 | 0.277925 | Nonsignifi |
| 133443.2 | 116735.8 | 33204.7  | 109227.2 | 112119.1 | 1.046448 | 0.871758 | 0.0655   | Nonsignifi |
| 56269.8  | 512007.6 | 67774.35 | 30228.32 | 60368.78 | 0.639318 | 0.314635 | -0.64539 | Nonsignifi |
| 221833.7 | 185016   | 391700.3 | 209509.7 | 248810.4 | 0.92689  | 0.616838 | -0.10953 | Nonsignifi |
| 220448.5 | 190158   | 158459.9 | 222743.5 | 187293.7 | 1.014467 | 0.854976 | 0.020722 | Nonsignifi |
| 997995.6 | 899955.4 | 698014   | 1078757  | 742068.6 | 0.93555  | 0.432809 | -0.09611 | Nonsignifi |
| 22348.67 | 48998.12 | 23655.01 | 29442.16 | 40203.73 | 0.977193 | 0.896644 | -0.03328 | Nonsignifi |
| 547949.6 | 486733.8 | 466896.1 | 575316.9 | 429908.1 | 0.962289 | 0.543949 | -0.05546 | Nonsignifi |
| 4905.94  | 0        | 4941.871 | 0        | 0        | 1.959368 | 0.23115  | 0.970388 | Nonsignifi |
| 552158.5 | 764207.4 | 424275.6 | 279023.3 | 534892.4 | 0.922481 | 0.69837  | -0.11641 | Nonsignifi |
| 0        | 21211.62 | 13963.17 | 0        | 55204.85 | 0.602982 | 0.242934 | -0.72981 | Nonsignifi |

|          |          |          |          |          |          |          |          |             |
|----------|----------|----------|----------|----------|----------|----------|----------|-------------|
| 478023.3 | 1613449  | 984004.2 | 843534.6 | 785395.3 | 0.994003 | 0.975941 | -0.00868 | Nonsignifi  |
| 69019.15 | 111229.4 | 82860.44 | 51976.77 | 79864.29 | 0.972311 | 0.911924 | -0.04051 | Nonsignifi  |
| 14543564 | 21667040 | 10618891 | 10914901 | 14510260 | 0.980991 | 0.884939 | -0.02769 | Nonsignifi  |
| 234226.6 | 185851.7 | 0        | 73993.91 | 150012.8 | 0.7826   | 0.330995 | -0.35365 | Nonsignifi  |
| 13964118 | 16557020 | 16217682 | 12744688 | 12558112 | 1.100604 | 0.414872 | 0.138296 | Nonsignifi  |
| 93039.82 | 162246.9 | 153542.5 | 119646.4 | 79641.34 | 0.790858 | 0.161684 | -0.33851 | Nonsignifi  |
| 90304.12 | 122229.4 | 110735.7 | 277706   | 143710.1 | 1.887463 | 0.265034 | 0.916448 | Nonsignifi  |
| 74650.66 | 101672   | 68829.61 | 50232.64 | 30105.21 | 1.613478 | 0.0782   | 0.690174 | Nonsignifi  |
| 2963614  | 2230365  | 3223339  | 1452860  | 2208459  | 1.532303 | 0.203958 | 0.615701 | Nonsignifi  |
| 11619452 | 10654454 | 8949259  | 10161484 | 10929000 | 1.067646 | 0.557382 | 0.094433 | Nonsignifi  |
| 149931.6 | 104812.3 | 306998.9 | 237475.9 | 199556.2 | 0.889797 | 0.516181 | -0.16845 | Nonsignifi  |
| 20430.19 | 0        | 61082.9  | 0        | 29086.67 | 1.174829 | 0.48365  | 0.232451 | Nonsignifi  |
| 1280143  | 2157196  | 1126215  | 3265532  | 2653452  | 1.031965 | 0.898587 | 0.045395 | Nonsignifi  |
| 65134.73 | 820772.8 | 101508.2 | 114416.7 | 135989.4 | 1.167686 | 0.681335 | 0.223652 | Nonsignifi  |
| 142618   | 685953.6 | 813643.1 | 397316.2 | 116580.6 | 2.599293 | 0.039087 | 1.378119 | Significant |
| 16807012 | 20025468 | 23849026 | 389560.6 | 409926.5 | 2.170613 | 0.060602 | 1.118102 | Nonsignifi  |
| 0        | 18698.32 | 13864.17 | 28366.79 | 12748.24 | 1.002074 | 0.99408  | 0.002989 | Nonsignifi  |
| 197517.5 | 416920.3 | 1076543  | 1135126  | 938471.2 | 1.540938 | 0.108186 | 0.623809 | Nonsignifi  |
| 2036433  | 3285071  | 3110724  | 2239040  | 4730989  | 0.89966  | 0.396047 | -0.15255 | Nonsignifi  |
| 85002.93 | 37749.57 | 89152.64 | 82676.03 | 42130.46 | 1.042878 | 0.83852  | 0.06057  | Nonsignifi  |
| 286192.3 | 289912.8 | 319330.4 | 302660.9 | 385371.5 | 1.142068 | 0.299549 | 0.191648 | Nonsignifi  |
| 74920.95 | 100601.6 | 109698   | 11234.76 | 8384.202 | 1.76776  | 0.424944 | 0.821923 | Nonsignifi  |
| 684319.8 | 2000458  | 1223397  | 1521472  | 2134869  | 0.924269 | 0.601219 | -0.11361 | Nonsignifi  |
| 557699.8 | 550478.1 | 496739.2 | 349344.6 | 611330.1 | 1.212894 | 0.244243 | 0.278454 | Nonsignifi  |
| 217091.2 | 84312.93 | 375918.2 | 118813.9 | 176917.5 | 1.325677 | 0.196149 | 0.406729 | Nonsignifi  |
| 298410.4 | 462641.3 | 141991.6 | 129671.4 | 251284.1 | 1.035833 | 0.899668 | 0.050791 | Nonsignifi  |
| 156264.3 | 172846.4 | 154934.8 | 0        | 0        | 1.844115 | 0.028989 | 0.882928 | Significant |
| 2177039  | 2643915  | 2072277  | 1533820  | 1405666  | 1.311513 | 0.286162 | 0.391232 | Nonsignifi  |
| 9426800  | 4246827  | 5829828  | 1399833  | 5332932  | 0.715972 | 0.226992 | -0.48203 | Nonsignifi  |
| 2296513  | 3759735  | 1406407  | 2585241  | 1072473  | 1.649487 | 0.03027  | 0.722018 | Significant |
| 75103.7  | 328788.7 | 69680.34 | 56490.81 | 1315185  | 1.136477 | 0.786395 | 0.184569 | Nonsignifi  |
| 232651.4 | 188470.5 | 159742.5 | 125234.2 | 182879.5 | 1.09517  | 0.461569 | 0.131155 | Nonsignifi  |
| 98898.73 | 113290   | 52213.81 | 123491.4 | 192295   | 0.904881 | 0.617483 | -0.1442  | Nonsignifi  |
| 93021.71 | 118436.1 | 0        | 0        | 96450.27 | 2.041797 | 0.254367 | 1.029839 | Nonsignifi  |
| 381798.7 | 772789.6 | 532601.8 | 326186.3 | 531590.8 | 1.059772 | 0.615131 | 0.083754 | Nonsignifi  |
| 983300.1 | 921261.9 | 699600.8 | 609909.6 | 1766706  | 0.870964 | 0.450019 | -0.19932 | Nonsignifi  |
| 1291214  | 3209227  | 4132092  | 2754657  | 4151811  | 1.242223 | 0.330224 | 0.312925 | Nonsignifi  |
| 839665.6 | 890841.6 | 1852082  | 709620.1 | 266900.3 | 1.092743 | 0.692563 | 0.127954 | Nonsignifi  |
| 22170.01 | 26608.37 | 31077.41 | 25533.93 | 28593.28 | 0.960048 | 0.569023 | -0.05882 | Nonsignifi  |
| 512969   | 433387.8 | 1040186  | 406406.7 | 467296.6 | 0.920899 | 0.604611 | -0.11889 | Nonsignifi  |
| 26989.37 | 29519.51 | 35780.65 | 37011.37 | 26610.52 | 1.03868  | 0.872094 | 0.054752 | Nonsignifi  |
| 21930.79 | 11916.35 | 9569.376 | 25994.01 | 13823.99 | 1.555789 | 0.058462 | 0.637647 | Nonsignifi  |
| 23427.73 | 19365.31 | 21296.38 | 27107.22 | 23472.49 | 1.099781 | 0.557272 | 0.137216 | Nonsignifi  |
| 5765786  | 6340287  | 5805853  | 7040059  | 5413483  | 0.891604 | 0.106712 | -0.16552 | Nonsignifi  |
| 309107.6 | 247844.7 | 225842.3 | 288205.6 | 197350.6 | 0.986362 | 0.780559 | -0.01981 | Nonsignifi  |
| 0        | 0        | 0        | 0        | 0        | 1.23221  | 0.55097  | 0.301248 | Nonsignifi  |
| 71119.59 | 69071.34 | 85921.39 | 87846.36 | 63342.69 | 1.088733 | 0.298009 | 0.12265  | Nonsignifi  |
| 1683890  | 1517020  | 1623234  | 1220309  | 1315998  | 1.019892 | 0.825268 | 0.028416 | Nonsignifi  |
| 0        | 14030.42 | 14644.29 | 0        | 11312.08 | 0.901214 | 0.637466 | -0.15006 | Nonsignifi  |
| 46464.01 | 43581.11 | 31941.67 | 115382.2 | 65792.23 | 0.675559 | 0.504852 | -0.56585 | Nonsignifi  |
| 514894.7 | 371640   | 420864.9 | 671841.5 | 355303.4 | 0.947376 | 0.603812 | -0.07799 | Nonsignifi  |
| 4218470  | 5915904  | 6180995  | 4712881  | 5981381  | 1.098821 | 0.612315 | 0.135957 | Nonsignifi  |
| 53668.77 | 133797.4 | 96997.57 | 68031.22 | 64895.14 | 1.106689 | 0.541609 | 0.14625  | Nonsignifi  |
| 0        | 84345.39 | 156000.1 | 40656.4  | 115247.2 | 0.877897 | 0.733351 | -0.18788 | Nonsignifi  |
| 0        | 306410.7 | 114109.2 | 323276.7 | 570281.1 | 0.714295 | 0.289806 | -0.48541 | Nonsignifi  |
| 4331.01  | 0        | 4602.789 | 6966.834 | 0        | 1.157634 | 0.545776 | 0.211179 | Nonsignifi  |
| 4196981  | 3420088  | 3230732  | 5371192  | 2828082  | 0.79062  | 0.038259 | -0.33894 | Nonsignifi  |
| 19215.99 | 17746.63 | 24904.1  | 15901.5  | 26832.05 | 0.883492 | 0.532904 | -0.17871 | Nonsignifi  |

|          |          |          |          |          |          |          |          |             |
|----------|----------|----------|----------|----------|----------|----------|----------|-------------|
| 0        | 2247549  | 0        | 0        | 2136509  | 1.079287 | 0.837558 | 0.110079 | Nonsignifi  |
| 244694.2 | 403593.9 | 168961.6 | 312496.8 | 310718.8 | 2.102319 | 0.15482  | 1.071982 | Nonsignifi  |
| 1340718  | 236223.5 | 362668.7 | 308766.5 | 1419069  | 1.271041 | 0.323647 | 0.34601  | Nonsignifi  |
| 226733.6 | 461416.1 | 293020.9 | 262301.3 | 2689787  | 1.599612 | 0.609395 | 0.677722 | Nonsignifi  |
| 122576.1 | 1371902  | 161788.2 | 116782.4 | 231031.7 | 3.089342 | 0.396892 | 1.6273   | Nonsignifi  |
| 63833.96 | 251081.6 | 384909.5 | 132696.8 | 374105.7 | 1.325618 | 0.314329 | 0.406665 | Nonsignifi  |
| 823744.1 | 841006   | 1736192  | 749882.2 | 1485600  | 1.633486 | 0.101032 | 0.707954 | Nonsignifi  |
| 128459.1 | 147430   | 180788.6 | 127081.8 | 109288.7 | 0.906927 | 0.745429 | -0.14094 | Nonsignifi  |
| 577223.4 | 56691.16 | 857890.3 | 653309.9 | 587164.5 | 0.970159 | 0.856347 | -0.04371 | Nonsignifi  |
| 261952.8 | 189271.9 | 280709.9 | 206674   | 212558.2 | 1.202924 | 0.362059 | 0.266546 | Nonsignifi  |
| 56794.62 | 62361.2  | 91390.11 | 24778.6  | 63225.72 | 0.636589 | 0.162593 | -0.65157 | Nonsignifi  |
| 1455706  | 480528   | 818553.3 | 1705683  | 1709095  | 1.185888 | 0.441304 | 0.245968 | Nonsignifi  |
| 133261   | 105926.2 | 121465.5 | 77130.59 | 66950.09 | 1.351856 | 0.191307 | 0.434942 | Nonsignifi  |
| 103607.9 | 191289   | 981958.9 | 343340.7 | 599709.1 | 0.330765 | 0.005799 | -1.59612 | Significant |
| 0        | 68531.24 | 0        | 57542.51 | 70069.3  | 0.648504 | 0.064127 | -0.62481 | Nonsignifi  |
| 0        | 72841.16 | 28574.44 | 26127.54 | 42658.58 | 0.745707 | 0.285394 | -0.42332 | Nonsignifi  |
| 29501.97 | 71373.59 | 18363.71 | 31496.19 | 76973.58 | 4.119186 | 0.215835 | 2.042359 | Nonsignifi  |
| 25461.38 | 228620.9 | 14812.01 | 23251.71 | 18099.03 | 0.514185 | 0.371064 | -0.95964 | Nonsignifi  |
| 34322.16 | 9980.463 | 24238.88 | 0        | 12356.74 | 0.526948 | 0.175596 | -0.92427 | Nonsignifi  |
| 0        | 20051.45 | 10298.25 | 16679.89 | 18086.57 | 1.104379 | 0.511843 | 0.143235 | Nonsignifi  |
| 16494.14 | 24833.88 | 20881.58 | 17315.47 | 34793.72 | 0.577869 | 0.004535 | -0.79118 | Significant |
| 524366.9 | 450020   | 399116   | 554480.1 | 427424.8 | 1.010259 | 0.878865 | 0.014726 | Nonsignifi  |
| 41403.97 | 38516.2  | 53772.22 | 49516.78 | 28477.34 | 1.432183 | 0.057726 | 0.518216 | Nonsignifi  |
| 550194.2 | 1384158  | 559428.9 | 756633.9 | 881966.9 | 0.915558 | 0.68303  | -0.12728 | Nonsignifi  |
| 821211.5 | 1725399  | 1059286  | 763060.4 | 1457522  | 0.673452 | 0.08623  | -0.57035 | Nonsignifi  |
| 416540.1 | 506086   | 752546.9 | 238722.5 | 353279.3 | 1.627281 | 0.05824  | 0.702464 | Nonsignifi  |
| 82526.95 | 49793.22 | 67452.48 | 112813.8 | 395269.6 | 1.753634 | 0.231298 | 0.810348 | Nonsignifi  |
| 495658.4 | 557028.2 | 492709.2 | 490811.4 | 491270.8 | 0.886335 | 0.470236 | -0.17408 | Nonsignifi  |
| 576370   | 527651.6 | 569638   | 525989.8 | 873222.4 | 1.128286 | 0.329544 | 0.174133 | Nonsignifi  |
| 50626.99 | 54214.32 | 6389.525 | 166837.6 | 39191.39 | 3.275612 | 0.03563  | 1.711764 | Significant |
| 87260.61 | 34538.07 | 65754.1  | 50575.29 | 151078.2 | 1.966372 | 0.125905 | 0.975536 | Nonsignifi  |
| 4139822  | 5429094  | 4771472  | 2528162  | 4670981  | 0.937541 | 0.719684 | -0.09305 | Nonsignifi  |
| 304063   | 178427.8 | 176139.6 | 246279.6 | 1584353  | 1.663675 | 0.227012 | 0.734374 | Nonsignifi  |
| 0        | 59943.34 | 80918.06 | 55066.55 | 92862.69 | 1.429762 | 0.167933 | 0.515775 | Nonsignifi  |
| 424665.5 | 340774.8 | 352190.1 | 442054.8 | 551658.9 | 1.711299 | 0.106806 | 0.775092 | Nonsignifi  |
| 266102.9 | 332098.8 | 1081486  | 195647.7 | 1564997  | 2.000184 | 0.135179 | 1.000133 | Nonsignifi  |
| 1329576  | 1150677  | 1395412  | 284194.5 | 1907907  | 1.232148 | 0.414882 | 0.301175 | Nonsignifi  |
| 293553.8 | 148976.6 | 1178637  | 128385.3 | 1687262  | 1.410572 | 0.382444 | 0.49628  | Nonsignifi  |
| 321446.9 | 147515.4 | 219304   | 148960.3 | 538385.3 | 1.367484 | 0.147357 | 0.451524 | Nonsignifi  |
| 531814.6 | 213703.1 | 99927.48 | 135773.5 | 276327.2 | 0.776472 | 0.491469 | -0.36499 | Nonsignifi  |
| 100228.1 | 89020.36 | 108700.2 | 122847.6 | 97964.55 | 1.14124  | 0.389824 | 0.190603 | Nonsignifi  |
| 0        | 0        | 50743.29 | 0        | 24078.68 | 0.482834 | 0.248835 | -1.0504  | Nonsignifi  |
| 16840.32 | 28865.79 | 3803.617 | 17743.29 | 17104.54 | 1.115442 | 0.500755 | 0.157616 | Nonsignifi  |
| 10358878 | 10822323 | 13310423 | 44593868 | 11089455 | 1.92094  | 0.027884 | 0.941813 | Significant |
| 52148492 | 71192160 | 46888688 | 80908232 | 70629568 | 1.355782 | 0.250701 | 0.439125 | Nonsignifi  |
| 13588.97 | 15808.99 | 0        | 13144.83 | 16649.51 | 1.430537 | 0.174341 | 0.516557 | Nonsignifi  |
| 0        | 73013.67 | 0        | 12074.15 | 0        | 0.514623 | 0.298589 | -0.95841 | Nonsignifi  |
| 0        | 0        | 0        | 0        | 9778.183 | 0.599637 | 0.063001 | -0.73784 | Nonsignifi  |
| 38310.75 | 79577.95 | 21564.68 | 172450.1 | 12361.65 | 1.653674 | 0.336667 | 0.725675 | Nonsignifi  |
| 24378.23 | 20985.6  | 29484.1  | 21854.82 | 23048.58 | 1.648105 | 0.098935 | 0.720809 | Nonsignifi  |
| 9424.588 | 14722.98 | 19723.96 | 4165.752 | 12012.88 | 1.195746 | 0.536736 | 0.257912 | Nonsignifi  |
| 48994.54 | 0        | 29298.45 | 19753.04 | 23872.28 | 0.80856  | 0.543373 | -0.30657 | Nonsignifi  |
| 2602.146 | 0        | 3484.372 | 0        | 1607.722 | 0.625488 | 0.129123 | -0.67695 | Nonsignifi  |
| 0        | 0        | 0        | 30967.95 | 0        | 2.464053 | 0.262555 | 1.301033 | Nonsignifi  |
| 55347.16 | 30290.06 | 36263.31 | 57357.66 | 80111.88 | 1.022333 | 0.943072 | 0.031865 | Nonsignifi  |
| 58664.96 | 61937.64 | 50564.18 | 69789.55 | 180823.7 | 1.486053 | 0.038433 | 0.571486 | Nonsignifi  |
| 0        | 0        | 0        | 0        | 16740.99 | 0.896606 | 0.880825 | -0.15745 | Nonsignifi  |
| 168612.1 | 274836.9 | 364796.1 | 335557.3 | 267447.3 | 1.306231 | 0.148351 | 0.38541  | Nonsignifi  |

|          |          |          |          |          |          |          |          |             |
|----------|----------|----------|----------|----------|----------|----------|----------|-------------|
| 129116.9 | 139676.4 | 395593.5 | 162279.9 | 142819   | 1.501939 | 0.167523 | 0.586826 | Nonsignifi  |
| 177048.9 | 42058.91 | 78373.58 | 9685.919 | 111673.4 | 0.857538 | 0.671584 | -0.22173 | Nonsignifi  |
| 5042458  | 6700274  | 7328881  | 4107996  | 11319295 | 1.129641 | 0.526999 | 0.175864 | Nonsignifi  |
| 403702.1 | 216576   | 500593.9 | 237882.6 | 247659.3 | 1.125224 | 0.551122 | 0.170212 | Nonsignifi  |
| 3470816  | 1006532  | 2671412  | 899170.6 | 1579870  | 0.801336 | 0.447337 | -0.31952 | Nonsignifi  |
| 149994.9 | 238024.5 | 0        | 133260.3 | 134173.1 | 0.826913 | 0.316779 | -0.27419 | Nonsignifi  |
| 82051.01 | 114438.7 | 137007.4 | 107976.5 | 119373.2 | 1.582288 | 0.019549 | 0.662012 | Significant |
| 0        | 9381.617 | 0        | 0        | 13920.18 | 0.690458 | 0.021418 | -0.53437 | Nonsignifi  |
| 454041.8 | 296754.4 | 209201.9 | 135765.5 | 738328.9 | 0.963503 | 0.865943 | -0.05364 | Nonsignifi  |
| 840399.8 | 918629.6 | 1550386  | 953825.4 | 977932.7 | 1.322755 | 0.377527 | 0.403546 | Nonsignifi  |
| 175477.7 | 209548.2 | 238210.5 | 119193.8 | 150725.2 | 1.521277 | 0.075286 | 0.605283 | Nonsignifi  |
| 75396.92 | 196013   | 47673.21 | 42300.48 | 131568   | 1.166526 | 0.552098 | 0.222219 | Nonsignifi  |
| 0        | 33688.28 | 667613.1 | 25066.38 | 96305.48 | 0.468699 | 0.399005 | -1.09327 | Nonsignifi  |
| 4247221  | 227831.5 | 45626.65 | 4370960  | 197908.6 | 1.099473 | 0.889319 | 0.136812 | Nonsignifi  |
| 34241.36 | 30023.69 | 84222.69 | 54729.63 | 61123.45 | 1.760296 | 0.024676 | 0.815818 | Significant |
| 66504.7  | 41452.26 | 80776.91 | 33819.05 | 85082.38 | 1.08787  | 0.685499 | 0.121507 | Nonsignifi  |
| 0        | 73042.8  | 0        | 147076.1 | 94316.78 | 1.085619 | 0.80282  | 0.118518 | Nonsignifi  |
| 1430936  | 1591792  | 2461148  | 1751792  | 2691566  | 1.180915 | 0.240854 | 0.239905 | Nonsignifi  |
| 224772.6 | 313462.9 | 105245.8 | 222575.6 | 188574.2 | 0.829231 | 0.265769 | -0.27015 | Nonsignifi  |
| 0        | 13469.4  | 8638.654 | 9720.021 | 17259.35 | 1.377469 | 0.251488 | 0.46202  | Nonsignifi  |
| 99627.89 | 35340.62 | 56305.84 | 14398.65 | 56364.2  | 1.468136 | 0.464592 | 0.553986 | Nonsignifi  |
| 9746.094 | 66129.29 | 0        | 0        | 0        | 0.979549 | 0.977028 | -0.02981 | Nonsignifi  |
| 183846.4 | 300691.5 | 332540.3 | 0        | 366707.9 | 1.190911 | 0.276734 | 0.252066 | Nonsignifi  |
| 627669.7 | 530334.9 | 775632.6 | 552830.6 | 1077105  | 1.421237 | 0.081374 | 0.507147 | Nonsignifi  |
| 205368.5 | 344764.8 | 448998   | 136614.9 | 448575   | 1.065687 | 0.690201 | 0.091784 | Nonsignifi  |
| 0        | 163652.5 | 0        | 92367.35 | 226983.4 | 2.139893 | 0.377287 | 1.097538 | Nonsignifi  |
| 1576435  | 2935271  | 2197111  | 1781228  | 3156095  | 1.47115  | 0.009393 | 0.556944 | Nonsignifi  |
| 392434.3 | 371945.3 | 202816.7 | 169828.5 | 258521.1 | 1.247658 | 0.197139 | 0.319222 | Nonsignifi  |
| 285049.8 | 311588.3 | 292907.5 | 315569.7 | 320826.9 | 1.450847 | 0.052506 | 0.536895 | Nonsignifi  |
| 59496.94 | 1336172  | 3065491  | 112431.5 | 487016.6 | 2.402391 | 0.046686 | 1.264471 | Significant |
| 967721.8 | 1024650  | 2247565  | 853648.1 | 1903246  | 1.037418 | 0.843831 | 0.052997 | Nonsignifi  |
| 56758.35 | 79909.75 | 35424.61 | 53424.19 | 80238.69 | 1.72079  | 0.041916 | 0.783071 | Significant |
| 129825.1 | 107857.4 | 99801.38 | 46987.81 | 62412.38 | 1.009663 | 0.960018 | 0.013874 | Nonsignifi  |
| 0        | 13187.62 | 0        | 21810.81 | 26973.18 | 0.956591 | 0.919889 | -0.06403 | Nonsignifi  |
| 293160.8 | 245852.3 | 263471.6 | 388730.8 | 152207.2 | 1.004316 | 0.975383 | 0.006213 | Nonsignifi  |
| 144393   | 234847   | 213183.9 | 233438.2 | 384408.3 | 1.879866 | 0.002032 | 0.91063  | Significant |
| 0        | 88076.16 | 0        | 0        | 0        | 0.774436 | 0.442359 | -0.36878 | Nonsignifi  |
| 0        | 0        | 0        | 0        | 321906.7 | 1.470586 | 0.314356 | 0.556391 | Nonsignifi  |
| 38064.86 | 122117   | 120805.2 | 71097.1  | 142811.2 | 1.228775 | 0.427481 | 0.297221 | Nonsignifi  |
| 95121.18 | 87114.95 | 12577.85 | 61320.16 | 68380.8  | 1.180746 | 0.48097  | 0.239699 | Nonsignifi  |
| 781901.6 | 522072.2 | 1646113  | 955166.7 | 1060668  | 1.157021 | 0.446512 | 0.210415 | Nonsignifi  |
| 339093.5 | 176866.1 | 165664.1 | 153038.5 | 384388.9 | 1.033915 | 0.906083 | 0.048118 | Nonsignifi  |
| 942698.4 | 90439.26 | 883307.4 | 1012729  | 104148.9 | 1.049242 | 0.913789 | 0.069347 | Nonsignifi  |
| 12110.86 | 10741.95 | 21188.46 | 20161.79 | 35785.07 | 0.766872 | 0.263061 | -0.38294 | Nonsignifi  |
| 90223.34 | 99720.31 | 165690.6 | 96884.49 | 59866.3  | 1.05114  | 0.937888 | 0.071955 | Nonsignifi  |
| 12017.18 | 6532.397 | 20041.84 | 25493.37 | 26311.68 | 1.001996 | 0.995896 | 0.002877 | Nonsignifi  |
| 870745.8 | 1302182  | 622390.8 | 1027399  | 1131593  | 0.811334 | 0.1535   | -0.30163 | Nonsignifi  |
| 390045.9 | 120640.6 | 376208.5 | 733847.4 | 352138.3 | 1.147887 | 0.587096 | 0.198981 | Nonsignifi  |
| 11734840 | 9796603  | 11421370 | 9083860  | 13299498 | 0.914958 | 0.537456 | -0.12822 | Nonsignifi  |
| 236619.6 | 316805.1 | 212266.7 | 629469.3 | 199661.5 | 1.110699 | 0.500607 | 0.151468 | Nonsignifi  |
| 1311737  | 859283.1 | 1298105  | 543519   | 1267552  | 0.690451 | 0.036571 | -0.53439 | Nonsignifi  |
| 428504.6 | 1067374  | 951629.8 | 1107092  | 657077.9 | 1.494272 | 0.263435 | 0.579443 | Nonsignifi  |
| 417158.8 | 671359.3 | 128739.6 | 76758.89 | 133334.5 | 2.251687 | 0.087638 | 1.171007 | Nonsignifi  |
| 104603.6 | 189540.1 | 0        | 182522.3 | 0        | 0.567349 | 0.243319 | -0.81769 | Nonsignifi  |
| 52256.25 | 250694.4 | 204077.1 | 117989.7 | 100838.7 | 1.334046 | 0.502995 | 0.415808 | Nonsignifi  |
| 116418.4 | 608542.4 | 277243.3 | 96387.42 | 331312.2 | 0.774565 | 0.306405 | -0.36854 | Nonsignifi  |
| 860857.8 | 62272.03 | 166993.9 | 223149.1 | 549638.3 | 0.631283 | 0.204525 | -0.66364 | Nonsignifi  |
| 923629.5 | 716149.5 | 551888.4 | 526847.1 | 432667.8 | 1.312252 | 0.210827 | 0.392044 | Nonsignifi  |

|          |          |          |          |          |          |          |          |             |
|----------|----------|----------|----------|----------|----------|----------|----------|-------------|
| 394814.7 | 181198.9 | 417787.7 | 559905.9 | 447165.9 | 1.947458 | 0.043946 | 0.961592 | Significant |
| 129361   | 230325.1 | 92512.47 | 105595.4 | 105530.2 | 1.055589 | 0.864158 | 0.078048 | Nonsignifi  |
| 61580.24 | 97737.84 | 46828.5  | 46278.07 | 207199.3 | 0.69232  | 0.264118 | -0.53049 | Nonsignifi  |
| 1304966  | 2107237  | 2930970  | 1500522  | 863913.8 | 1.353017 | 0.159747 | 0.43618  | Nonsignifi  |
| 23029.37 | 36581.78 | 39326.51 | 35741.7  | 20331.39 | 0.370853 | 0.001563 | -1.43108 | Significant |
| 0        | 60800.82 | 129989.6 | 0        | 146276.9 | 1.316133 | 0.329289 | 0.396306 | Nonsignifi  |
| 0        | 85810.69 | 84214.73 | 66824.86 | 56647.86 | 1.225099 | 0.350891 | 0.292898 | Nonsignifi  |
| 0        | 0        | 0        | 0        | 0        | 1.171823 | 0.691458 | 0.228755 | Nonsignifi  |
| 913455   | 3325347  | 1043320  | 930561.7 | 863991.8 | 1.427954 | 0.204319 | 0.51395  | Nonsignifi  |
| 0        | 64055.71 | 20940.84 | 110806.6 | 0        | 1.317795 | 0.599435 | 0.398126 | Nonsignifi  |
| 92093.73 | 47866.68 | 60592.07 | 28783.24 | 30742.26 | 0.907603 | 0.615288 | -0.13987 | Nonsignifi  |
| 0        | 40152.94 | 0        | 46465.56 | 2993.414 | 0.958622 | 0.929945 | -0.06097 | Nonsignifi  |
| 897756.9 | 1432088  | 1208963  | 1790077  | 2826148  | 1.117968 | 0.539363 | 0.160878 | Nonsignifi  |
| 192117.7 | 81185.26 | 168666.2 | 41164.59 | 209341.4 | 0.549577 | 0.205868 | -0.86361 | Nonsignifi  |
| 32872.38 | 55169.75 | 76293.48 | 269885.8 | 88352.93 | 0.842567 | 0.618072 | -0.24714 | Nonsignifi  |
| 0        | 1979630  | 0        | 34949.77 | 54739.55 | 1.600089 | 0.786908 | 0.678152 | Nonsignifi  |
| 712398.4 | 222122.9 | 1060840  | 128162.1 | 637408.8 | 1.224541 | 0.505841 | 0.292241 | Nonsignifi  |
| 68126.16 | 134769.8 | 44754.41 | 123304.3 | 476108.1 | 1.472312 | 0.214829 | 0.558083 | Nonsignifi  |
| 1145594  | 216004.5 | 3768541  | 1506253  | 3783216  | 0.964008 | 0.889183 | -0.05288 | Nonsignifi  |
| 255505.5 | 138312.8 | 351496.2 | 311126.5 | 518169.8 | 1.438679 | 0.318551 | 0.524744 | Nonsignifi  |
| 0        | 0        | 0        | 0        | 0        | 0.432513 | 0.030838 | -1.20918 | Significant |
| 63879.75 | 13041.47 | 14823.09 | 23427.6  | 11922.1  | 0.694646 | 0.20424  | -0.52565 | Nonsignifi  |
| 26991.16 | 137695.8 | 57666.36 | 23033.23 | 0        | 0.900897 | 0.694838 | -0.15057 | Nonsignifi  |
| 0        | 31600.22 | 0        | 88791.59 | 8502.249 | 3.566956 | 0.056484 | 1.834693 | Nonsignifi  |
| 26820.86 | 141385.4 | 0        | 0        | 116512.7 | 0.480388 | 0.148319 | -1.05773 | Nonsignifi  |
| 82575.72 | 101271.8 | 65455.77 | 178265.5 | 225682.3 | 0.866182 | 0.54266  | -0.20726 | Nonsignifi  |
| 17987.43 | 63688.16 | 119818.7 | 74301.25 | 201559.4 | 0.910168 | 0.749374 | -0.1358  | Nonsignifi  |
| 12209.71 | 21979.14 | 22715.64 | 13484.92 | 51196.54 | 2.599097 | 0.143569 | 1.378011 | Nonsignifi  |
| 187299.7 | 63518.23 | 140398.5 | 24138.13 | 147073.7 | 0.789008 | 0.411617 | -0.34189 | Nonsignifi  |
| 105664.8 | 139933.9 | 100898.2 | 54393.38 | 108277.6 | 0.936867 | 0.628113 | -0.09408 | Nonsignifi  |
| 260308   | 1188067  | 519847.3 | 214759.2 | 401231.6 | 0.969201 | 0.899157 | -0.04513 | Nonsignifi  |
| 0        | 0        | 0        | 37514.32 | 0        | 0.920663 | 0.803902 | -0.11926 | Nonsignifi  |
| 38221.08 | 71689.22 | 19899.27 | 17534.67 | 18382.19 | 0.983422 | 0.96058  | -0.02412 | Nonsignifi  |
| 266956.7 | 701614.7 | 262313.4 | 179913.4 | 1079009  | 1.213283 | 0.565225 | 0.278916 | Nonsignifi  |
| 68195.61 | 26790.96 | 57432.29 | 18816.74 | 15542.59 | 1.390605 | 0.336545 | 0.475713 | Nonsignifi  |
| 65528.2  | 73273.42 | 62019.01 | 60980.02 | 65245.25 | 1.3723   | 0.050984 | 0.456595 | Nonsignifi  |
| 49080.85 | 24068.37 | 33614.14 | 24991.08 | 35223.21 | 1.08224  | 0.779402 | 0.11402  | Nonsignifi  |
| 11508.82 | 15823.89 | 38664.96 | 32969.13 | 44460.55 | 1.225579 | 0.477254 | 0.293463 | Nonsignifi  |
| 290598.7 | 94617.34 | 497670.5 | 159447.4 | 280185.2 | 0.933822 | 0.774318 | -0.09878 | Nonsignifi  |
| 58083.29 | 117591   | 175860   | 378047.9 | 214834.8 | 1.451557 | 0.067324 | 0.537601 | Nonsignifi  |
| 12234.02 | 48595.7  | 10989.18 | 8263.18  | 18002.49 | 1.162476 | 0.696195 | 0.217201 | Nonsignifi  |
| 278192.9 | 133211.4 | 236450.1 | 182238   | 417000.3 | 1.448024 | 0.136778 | 0.534086 | Nonsignifi  |
| 0        | 164465.5 | 159806.5 | 0        | 0        | 0.875198 | 0.424078 | -0.19232 | Nonsignifi  |
| 14325.48 | 23224.98 | 6679.745 | 10746.5  | 70961.91 | 0.998523 | 0.996805 | -0.00213 | Nonsignifi  |
| 155081   | 298878.1 | 291443.2 | 94877.84 | 241729.5 | 1.422853 | 0.041054 | 0.508786 | Nonsignifi  |
| 4024389  | 341133.3 | 9456408  | 3493970  | 8113936  | 0.686741 | 0.276056 | -0.54216 | Nonsignifi  |
| 336914.6 | 751996   | 591319.1 | 413399.3 | 547696.7 | 0.92156  | 0.663533 | -0.11785 | Nonsignifi  |
| 74656.23 | 50166.64 | 13072.53 | 70012.49 | 24043.54 | 1.401837 | 0.219048 | 0.487319 | Nonsignifi  |
| 68795.98 | 61929.6  | 95663.55 | 42365.1  | 75962.12 | 1.122624 | 0.708086 | 0.166875 | Nonsignifi  |
| 1232552  | 540138.1 | 1511672  | 2159217  | 2113623  | 0.891837 | 0.586488 | -0.16515 | Nonsignifi  |
| 31239.83 | 28047.09 | 77491.8  | 57349.51 | 112297.7 | 0.992619 | 0.980333 | -0.01069 | Nonsignifi  |
| 181471.6 | 169499.3 | 395361.5 | 379879.3 | 269057   | 1.080491 | 0.57354  | 0.111687 | Nonsignifi  |
| 125333.3 | 388782   | 270487.7 | 236916.2 | 123852.6 | 1.391524 | 0.091504 | 0.476665 | Nonsignifi  |
| 1148114  | 1259137  | 780397.6 | 1688436  | 1156926  | 0.925111 | 0.390785 | -0.1123  | Nonsignifi  |
| 4310.886 | 0        | 0        | 6362.27  | 0        | 1.498386 | 0.136805 | 0.583409 | Nonsignifi  |
| 3729.905 | 3825.577 | 5256.752 | 3045.195 | 3744.503 | 1.732152 | 0.341927 | 0.792566 | Nonsignifi  |
| 0        | 0        | 0        | 0        | 0        | 0.394223 | 0.042599 | -1.34292 | Significant |
| 3316267  | 2781627  | 1653130  | 2385792  | 2448982  | 0.890237 | 0.209897 | -0.16774 | Nonsignifi  |

|          |          |          |          |          |          |          |          |             |
|----------|----------|----------|----------|----------|----------|----------|----------|-------------|
| 18456.69 | 11100.35 | 5466.329 | 12309.39 | 8117.243 | 1.391024 | 0.10821  | 0.476148 | Nonsignifi  |
| 2936604  | 1882079  | 8487510  | 3031154  | 2746900  | 0.984823 | 0.948656 | -0.02206 | Nonsignifi  |
| 4840.727 | 0        | 13891.03 | 5998.446 | 13181.68 | 1.561869 | 0.160802 | 0.643274 | Nonsignifi  |
| 0        | 0        | 0        | 41292.86 | 35040.96 | 0.940399 | 0.658405 | -0.08865 | Nonsignifi  |
| 13257.56 | 10460.32 | 15284.49 | 18316.8  | 7755.771 | 1.145808 | 0.674101 | 0.196366 | Nonsignifi  |
| 1143516  | 1054182  | 1225122  | 885287.1 | 944541.9 | 0.880016 | 0.134673 | -0.1844  | Nonsignifi  |
| 11211878 | 9266427  | 9766963  | 11212867 | 8685727  | 0.781641 | 0.015915 | -0.35542 | Nonsignifi  |
| 8187942  | 6465892  | 6908257  | 11345410 | 7895971  | 0.853184 | 0.053168 | -0.22907 | Nonsignifi  |
| 5883.51  | 4720.064 | 0        | 4152.587 | 5418.713 | 2.153988 | 0.071578 | 1.10701  | Nonsignifi  |
| 11698.9  | 11469.31 | 11926.71 | 13437.11 | 13613.62 | 0.991099 | 0.960762 | -0.0129  | Nonsignifi  |
| 13725.69 | 0        | 18975.89 | 11559.72 | 12718.27 | 3.630829 | 0.333194 | 1.860299 | Nonsignifi  |
| 2660.434 | 4847.483 | 7831.351 | 5232.649 | 4578.263 | 1.125508 | 0.363552 | 0.170576 | Nonsignifi  |
| 0        | 9109.355 | 13886.38 | 0        | 10727.39 | 1.439974 | 0.208127 | 0.526042 | Nonsignifi  |
| 103843   | 68942.05 | 43219.46 | 112435   | 120915.3 | 1.006561 | 0.972943 | 0.009434 | Nonsignifi  |
| 178639.1 | 148093.9 | 164066.2 | 183137.5 | 339575.4 | 0.767614 | 0.318259 | -0.38155 | Nonsignifi  |
| 1610045  | 1451929  | 1482825  | 1628433  | 1480888  | 0.955544 | 0.654746 | -0.06561 | Nonsignifi  |
| 31853.67 | 30287.49 | 33455.71 | 36348.21 | 29354.39 | 0.759812 | 0.071621 | -0.39629 | Nonsignifi  |
| 249633.8 | 288364.1 | 252327   | 240286.2 | 247420.4 | 0.99721  | 0.986821 | -0.00403 | Nonsignifi  |
| 16620.86 | 14581.17 | 35106.13 | 19559.54 | 23612.74 | 1.695745 | 0.059008 | 0.761919 | Nonsignifi  |
| 355497.8 | 769840.3 | 400087.2 | 340915.6 | 597326.6 | 0.91757  | 0.515885 | -0.12411 | Nonsignifi  |
| 155151.6 | 389114.9 | 450450.4 | 199646.5 | 206741.7 | 0.990783 | 0.96054  | -0.01336 | Nonsignifi  |
| 207065.8 | 581921.9 | 144994.8 | 166761.4 | 1150923  | 0.829622 | 0.546468 | -0.26947 | Nonsignifi  |
| 250544.2 | 1241707  | 272810.2 | 264764.3 | 576494.1 | 0.530747 | 0.147999 | -0.9139  | Nonsignifi  |
| 51906.06 | 135334.9 | 115326.9 | 111397.8 | 268739.8 | 1.156278 | 0.501631 | 0.209489 | Nonsignifi  |
| 15219.84 | 23107.93 | 239819.2 | 11200.25 | 5335.02  | 0.302754 | 0.113204 | -1.72378 | Nonsignifi  |
| 90607.5  | 135532.3 | 278148.5 | 255922.1 | 227912.4 | 1.122994 | 0.65651  | 0.16735  | Nonsignifi  |
| 0        | 0        | 0        | 0        | 0        | 3.005081 | 0.089551 | 1.587404 | Nonsignifi  |
| 581008.1 | 428391.4 | 350016.7 | 500922.4 | 465765   | 1.408202 | 0.004693 | 0.493855 | Nonsignifi  |
| 81848.27 | 76977.65 | 93797.53 | 86610.16 | 0        | 1.062961 | 0.544751 | 0.088089 | Nonsignifi  |
| 135237.9 | 607409.4 | 210748.5 | 204171   | 235075.6 | 0.77769  | 0.241758 | -0.36273 | Nonsignifi  |
| 62815.86 | 57467    | 56241.68 | 14085.86 | 59346.38 | 1.122312 | 0.724129 | 0.166474 | Nonsignifi  |
| 31304.14 | 47168.05 | 0        | 0        | 0        | 2.316735 | 0.309205 | 1.212093 | Nonsignifi  |
| 328660   | 263277.4 | 407851.9 | 284632.1 | 779719   | 1.346295 | 0.141867 | 0.428995 | Nonsignifi  |
| 219865   | 242318.3 | 182284.2 | 56093.57 | 0        | 0.886277 | 0.717868 | -0.17417 | Nonsignifi  |
| 109558.4 | 127895.5 | 115861.3 | 277577.2 | 155718.5 | 1.04053  | 0.90388  | 0.057319 | Nonsignifi  |
| 143743.8 | 179725.2 | 93673.13 | 181831.1 | 116106.1 | 1.052106 | 0.814977 | 0.07328  | Nonsignifi  |
| 821614.6 | 738762.1 | 1115505  | 1216608  | 2457819  | 1.164635 | 0.395211 | 0.219878 | Nonsignifi  |
| 0        | 52237.18 | 51366.89 | 37656.34 | 85613.15 | 1.256038 | 0.404247 | 0.32888  | Nonsignifi  |
| 83927.88 | 203877.3 | 75715.88 | 83025.33 | 64278.53 | 2.350818 | 0.373699 | 1.233163 | Nonsignifi  |
| 56834.14 | 135982   | 72859.66 | 56131.19 | 53501.99 | 2.360951 | 0.000546 | 1.239368 | Significant |
| 98061.03 | 273242.1 | 49716.31 | 213155.4 | 400109.3 | 1.255626 | 0.385273 | 0.328406 | Nonsignifi  |
| 2745560  | 1769715  | 3600402  | 2516322  | 1522435  | 1.077255 | 0.774889 | 0.10736  | Nonsignifi  |
| 113576.7 | 196519.8 | 226488.5 | 178583.8 | 164199.9 | 1.018517 | 0.910287 | 0.02647  | Nonsignifi  |
| 23759.02 | 90242.07 | 121524.8 | 114369.1 | 55949.88 | 1.422743 | 0.124822 | 0.508675 | Nonsignifi  |
| 30473.19 | 35150.23 | 118090.3 | 32466.69 | 70680.2  | 3.085285 | 0.042356 | 1.625404 | Significant |
| 43322.63 | 18970    | 17454.36 | 32968.95 | 18392.62 | 1.337391 | 0.208483 | 0.419422 | Nonsignifi  |
| 1224983  | 2529024  | 1314424  | 1153872  | 2198171  | 1.10283  | 0.518292 | 0.141211 | Nonsignifi  |
| 308722.6 | 436557.2 | 494820.7 | 400276   | 443434   | 1.020613 | 0.878937 | 0.029435 | Nonsignifi  |
| 527661.4 | 783156.8 | 331332.2 | 533858.8 | 725089.5 | 1.237068 | 0.486703 | 0.306924 | Nonsignifi  |
| 53567.57 | 52206.03 | 25894.68 | 0        | 0        | 5.715415 | 0.2593   | 2.514858 | Nonsignifi  |
| 16501488 | 24235268 | 28529770 | 13498662 | 26919434 | 1.041024 | 0.811828 | 0.058004 | Nonsignifi  |
| 4765495  | 5840754  | 6631747  | 3324713  | 5449329  | 1.43928  | 0.009846 | 0.525347 | Nonsignifi  |
| 18284.92 | 17140.76 | 31970.54 | 17349.73 | 0        | 1.363333 | 0.273533 | 0.447138 | Nonsignifi  |
| 18841.74 | 20929.95 | 29640.91 | 0        | 19559.39 | 1.135093 | 0.544104 | 0.182811 | Nonsignifi  |
| 11174    | 14049.99 | 24958.72 | 0        | 0        | 2.559291 | 0.012042 | 1.355744 | Significant |
| 35877.66 | 342706.8 | 0        | 0        | 0        | 0.715063 | 0.453963 | -0.48386 | Nonsignifi  |
| 26911.81 | 77323.42 | 56002.02 | 48209.22 | 0        | 0.774324 | 0.301238 | -0.36899 | Nonsignifi  |
| 0        | 69887.91 | 48875.57 | 46529.96 | 23605.22 | 0.910068 | 0.710108 | -0.13595 | Nonsignifi  |



|          |          |          |          |          |          |          |          |             |
|----------|----------|----------|----------|----------|----------|----------|----------|-------------|
| 229335.2 | 501540.5 | 203114.8 | 363672.2 | 407302.9 | 1.173025 | 0.327304 | 0.230234 | Nonsignifi  |
| 149763.2 | 135955.5 | 305011.5 | 146320.8 | 267343.3 | 0.949043 | 0.781947 | -0.07545 | Nonsignifi  |
| 29940.84 | 35571.38 | 44187.2  | 21356.7  | 31497.54 | 0.804209 | 0.56097  | -0.31436 | Nonsignifi  |
| 284122.5 | 126359.7 | 206940.2 | 174240.3 | 237601.5 | 1.764045 | 0.191806 | 0.818887 | Nonsignifi  |
| 625630.6 | 618912.9 | 706786.5 | 409423.7 | 908297.6 | 1.32315  | 0.288967 | 0.403976 | Nonsignifi  |
| 0        | 17086.74 | 5131.492 | 7358.662 | 16671.18 | 1.591918 | 0.218487 | 0.670766 | Nonsignifi  |
| 0        | 0        | 0        | 64036.14 | 187615   | 0.753393 | 0.538668 | -0.40853 | Nonsignifi  |
| 16935.11 | 30569.06 | 56200.17 | 66024.83 | 37546.18 | 1.87817  | 0.086496 | 0.909327 | Nonsignifi  |
| 479412.6 | 739272.3 | 861944.5 | 474542.8 | 470299.4 | 0.757925 | 0.557231 | -0.39987 | Nonsignifi  |
| 67575016 | 69468752 | 66207112 | 51971948 | 68394184 | 0.994659 | 0.970236 | -0.00773 | Nonsignifi  |
| 1819254  | 603254.3 | 361002   | 628668.8 | 677214.7 | 1.077943 | 0.829109 | 0.108281 | Nonsignifi  |
| 36510.96 | 91644.72 | 68126.27 | 0        | 175109.8 | 0.994019 | 0.978182 | -0.00865 | Nonsignifi  |
| 383834.9 | 1011569  | 616401.4 | 607607.9 | 769232.3 | 0.700058 | 0.102321 | -0.51445 | Nonsignifi  |
| 0        | 29829.28 | 0        | 46145.59 | 52016.74 | 0.722222 | 0.195385 | -0.46949 | Nonsignifi  |
| 0        | 289283.1 | 0        | 144914.3 | 0        | 1.952856 | 0.321553 | 0.965585 | Nonsignifi  |
| 3297202  | 5255782  | 1298276  | 3682932  | 797827.3 | 1.622457 | 0.087832 | 0.698181 | Nonsignifi  |
| 224772.6 | 313462.9 | 97913.33 | 121579.1 | 176250   | 0.82845  | 0.390744 | -0.27151 | Nonsignifi  |
| 104193.8 | 199851.2 | 107805.9 | 91207.01 | 230128.4 | 0.864993 | 0.528604 | -0.20924 | Nonsignifi  |
| 0        | 124157.2 | 60824.32 | 34046.3  | 84720.16 | 1.154359 | 0.502189 | 0.207092 | Nonsignifi  |
| 397560.3 | 456739.2 | 839548.1 | 685001.9 | 180355.8 | 1.979387 | 0.023338 | 0.985053 | Significant |
| 274727.6 | 131546.6 | 232111.2 | 240067.5 | 203168.9 | 1.224536 | 0.304195 | 0.292235 | Nonsignifi  |
| 381590.5 | 5175066  | 602462.4 | 3407638  | 6896863  | 0.566448 | 0.169964 | -0.81998 | Nonsignifi  |
| 8340418  | 5649035  | 6098278  | 8227539  | 7045255  | 0.934652 | 0.296238 | -0.0975  | Nonsignifi  |
| 0        | 57480.3  | 0        | 0        | 72672.02 | 3.039001 | 0.013189 | 1.603597 | Significant |
| 0        | 0        | 0        | 0        | 33840.19 | 1.015242 | 0.897276 | 0.021824 | Nonsignifi  |
| 21497358 | 15999864 | 17877260 | 17513216 | 12031941 | 0.830809 | 0.185045 | -0.26741 | Nonsignifi  |
| 174886.5 | 239794   | 352796.8 | 86480.31 | 100819.2 | 1.138605 | 0.485657 | 0.187268 | Nonsignifi  |
| 4362.011 | 5059.601 | 0        | 4557.656 | 5239.711 | 0.810984 | 0.037932 | -0.30226 | Nonsignifi  |
| 7576.509 | 7163.1   | 13552.82 | 0        | 4901.171 | 1.380118 | 0.31984  | 0.464792 | Nonsignifi  |
| 0        | 20328.05 | 23703.15 | 0        | 230177.6 | 1.417481 | 0.2823   | 0.503329 | Nonsignifi  |
| 12533.22 | 9634.947 | 12998.7  | 17225.88 | 11470.14 | 1.176445 | 0.054772 | 0.234433 | Nonsignifi  |
| 10104907 | 8639706  | 8691321  | 12654672 | 8677639  | 0.911467 | 0.127741 | -0.13374 | Nonsignifi  |
| 179656.9 | 172505.5 | 151487.4 | 189368.3 | 175313.6 | 0.907864 | 0.575212 | -0.13945 | Nonsignifi  |
| 4571807  | 1930271  | 3430493  | 3695399  | 3144928  | 0.86099  | 0.210629 | -0.21593 | Nonsignifi  |
| 151976.8 | 153432.9 | 179850.3 | 153301   | 156415.7 | 0.71162  | 0.003665 | -0.49082 | Nonsignifi  |
| 163001.2 | 114787.4 | 204044.4 | 149456.2 | 186184.7 | 1.138148 | 0.397161 | 0.186688 | Nonsignifi  |
| 321828.3 | 324873.1 | 277287.5 | 280157.1 | 426420.1 | 0.827704 | 0.298492 | -0.27281 | Nonsignifi  |
| 8473.228 | 6406.945 | 0        | 0        | 6009.424 | 1.353256 | 0.14851  | 0.436434 | Nonsignifi  |
| 22220.83 | 23566.19 | 0        | 21139.05 | 0        | 1.296705 | 0.122103 | 0.37485  | Nonsignifi  |
| 96960.01 | 131624.6 | 107735.8 | 162192.2 | 91407.7  | 0.999496 | 0.996475 | -0.00073 | Nonsignifi  |
| 590414.9 | 855583.7 | 593076.9 | 1022304  | 1493879  | 0.941478 | 0.581096 | -0.087   | Nonsignifi  |
| 288453.3 | 664692.3 | 2188981  | 1697185  | 2305441  | 1.348132 | 0.35939  | 0.430962 | Nonsignifi  |
| 25102.44 | 32916.98 | 31160.76 | 18976.14 | 26274.29 | 0.882458 | 0.477042 | -0.1804  | Nonsignifi  |
| 6254.728 | 21921.08 | 8846.853 | 3840.004 | 6624.642 | 2.498079 | 0.032062 | 1.320819 | Significant |
| 15676.03 | 8208.28  | 0        | 10256.81 | 15746.21 | 1.461877 | 0.161519 | 0.547822 | Nonsignifi  |
| 878229.4 | 1485949  | 0        | 1732895  | 731237.8 | 1.123984 | 0.566891 | 0.168622 | Nonsignifi  |
| 442353.7 | 292193.3 | 321944   | 496798.8 | 307650.5 | 0.857264 | 0.239594 | -0.22219 | Nonsignifi  |
| 72916.61 | 66379.06 | 54058.46 | 83337.2  | 31477.8  | 0.962624 | 0.725625 | -0.05496 | Nonsignifi  |
| 42762.82 | 7876.408 | 35300.45 | 22478.39 | 23934.07 | 0.945163 | 0.837111 | -0.08136 | Nonsignifi  |
| 4187324  | 3764536  | 3459237  | 4077988  | 3286252  | 1.152028 | 0.391192 | 0.204176 | Nonsignifi  |
| 13606.33 | 0        | 114462.6 | 0        | 0        | 0.365461 | 0.487859 | -1.45221 | Nonsignifi  |
| 17228.99 | 0        | 19291.54 | 15655.46 | 13433.47 | 0.936064 | 0.80163  | -0.09532 | Nonsignifi  |
| 0        | 0        | 0        | 3425.685 | 0        | 3.724594 | 0.314125 | 1.897083 | Nonsignifi  |
| 8532.441 | 23612.72 | 10205.01 | 15976.28 | 17255.99 | 1.141687 | 0.609662 | 0.191168 | Nonsignifi  |
| 861372.7 | 1128111  | 1066580  | 941072.8 | 916373   | 0.785315 | 0.028284 | -0.34866 | Nonsignifi  |
| 50612.73 | 141622.2 | 94620.43 | 108374.4 | 31524.55 | 1.595027 | 0.044973 | 0.67358  | Significant |
| 99489.38 | 148808.4 | 26487.41 | 59705.45 | 39517.3  | 0.819349 | 0.359341 | -0.28745 | Nonsignifi  |
| 5223082  | 4808008  | 4987936  | 4387976  | 4562295  | 0.935653 | 0.499152 | -0.09596 | Nonsignifi  |

|          |          |          |          |          |          |          |          |            |
|----------|----------|----------|----------|----------|----------|----------|----------|------------|
| 0        | 0        | 44036.34 | 16347.01 | 16742.71 | 0.809015 | 0.455041 | -0.30576 | Nonsignifi |
| 2341908  | 2998404  | 5773738  | 2746927  | 4781742  | 0.977965 | 0.881769 | -0.03215 | Nonsignifi |
| 623331.6 | 149699.3 | 468159.3 | 323667.1 | 322590.7 | 3.237057 | 0.060763 | 1.694683 | Nonsignifi |
| 12894.31 | 139714.1 | 250286.1 | 0        | 238788.3 | 1.158667 | 0.752042 | 0.212466 | Nonsignifi |
| 1365516  | 1013739  | 611283.9 | 1037664  | 1438036  | 0.610597 | 0.007559 | -0.71171 | Significan |
| 0        | 1458.088 | 0        | 0        | 0        | 237.8732 | 0.128864 | 7.894049 | Nonsignifi |
| 0        | 55969.79 | 0        | 0        | 0        | 1.57289  | 0.388405 | 0.653418 | Nonsignifi |
| 70776.72 | 50409.98 | 97301.09 | 50069.75 | 63558.62 | 0.593795 | 0.033241 | -0.75196 | Significan |
| 718751.4 | 502819.6 | 80478.46 | 59792.92 | 626695.8 | 0.924991 | 0.836099 | -0.11249 | Nonsignifi |
| 0        | 8425.525 | 0        | 0        | 12503.95 | 1.838747 | 0.303298 | 0.878723 | Nonsignifi |
| 5176494  | 4716164  | 3678418  | 4579328  | 3660636  | 0.751101 | 0.005101 | -0.41292 | Nonsignifi |
| 0        | 3018.199 | 4222.896 | 4069.149 | 5037.016 | 1.696199 | 0.474338 | 0.762306 | Nonsignifi |
| 56064.91 | 75788.36 | 84683.78 | 81011.13 | 77539.83 | 0.875463 | 0.30395  | -0.19188 | Nonsignifi |
| 26185.09 | 22240.96 | 33224.97 | 18781.52 | 25054.27 | 1.049771 | 0.760085 | 0.070075 | Nonsignifi |
| 26557.14 | 26081.78 | 17192.07 | 16488.85 | 12478.28 | 1.487518 | 0.038086 | 0.572907 | Nonsignifi |
| 98893.98 | 116997.9 | 138191.1 | 119524.4 | 108273.6 | 0.639606 | 0.02857  | -0.64474 | Significan |
| 4204.817 | 794814.5 | 2637.363 | 0        | 655758.7 | 1.586432 | 0.449693 | 0.665785 | Nonsignifi |
| 99413.95 | 0        | 0        | 13585.16 | 8153.617 | 0.64622  | 0.52775  | -0.6299  | Nonsignifi |
| 190567.2 | 316951.2 | 234477.2 | 412463   | 529039.5 | 0.711015 | 0.047231 | -0.49205 | Nonsignifi |
| 328748.1 | 309508.9 | 355690.3 | 375561.5 | 325852.1 | 1.04523  | 0.541898 | 0.063821 | Nonsignifi |
| 11992.38 | 39831.79 | 17909.49 | 0        | 0        | 0.869921 | 0.581282 | -0.20104 | Nonsignifi |
| 203485.1 | 225523.1 | 41051.96 | 193535.2 | 392988.8 | 0.847228 | 0.550204 | -0.23918 | Nonsignifi |
| 2164098  | 1711229  | 1813914  | 2219065  | 1701826  | 0.890009 | 0.291579 | -0.16811 | Nonsignifi |
| 9279.475 | 16194.29 | 24649.57 | 22237.74 | 15767.05 | 0.98143  | 0.897802 | -0.02704 | Nonsignifi |
| 43980.85 | 42329.21 | 33580.18 | 49763.64 | 53128.54 | 1.065764 | 0.673399 | 0.091888 | Nonsignifi |
| 748746.8 | 411423.3 | 855315.3 | 831733.1 | 708968.1 | 0.728578 | 0.09204  | -0.45684 | Nonsignifi |
| 11960.38 | 20067.25 | 14829.09 | 25339.68 | 23401.49 | 1.259968 | 0.289611 | 0.333387 | Nonsignifi |
| 7032252  | 4492830  | 220336.4 | 205043.4 | 67962.41 | 0.10621  | 0.091679 | -3.235   | Nonsignifi |
| 57349.67 | 58003.23 | 45295.63 | 40273.72 | 47601.62 | 0.861697 | 0.13503  | -0.21475 | Nonsignifi |
| 27720.04 | 29983.83 | 8964.872 | 11191.54 | 2185198  | 0.786434 | 0.843511 | -0.3466  | Nonsignifi |
| 0        | 0        | 21971.85 | 0        | 0        | 1.193036 | 0.628415 | 0.254638 | Nonsignifi |
| 14606503 | 11260518 | 11179716 | 15845355 | 10727354 | 0.978008 | 0.801755 | -0.03208 | Nonsignifi |
| 30372.54 | 11421.15 | 28999.49 | 15182.03 | 52840.99 | 0.729132 | 0.21878  | -0.45575 | Nonsignifi |
| 36782.48 | 0        | 65362.81 | 0        | 39313.31 | 0.897645 | 0.534719 | -0.15578 | Nonsignifi |
| 0        | 0        | 0        | 0        | 8393.977 | 1.197753 | 0.606155 | 0.260331 | Nonsignifi |
| 5883.492 | 4720.104 | 8085.634 | 4152.207 | 5418.723 | 2.084095 | 0.12634  | 1.059421 | Nonsignifi |
| 207254.6 | 272850.8 | 261523.7 | 251868   | 261065.8 | 1.079972 | 0.456741 | 0.110994 | Nonsignifi |
| 20488.8  | 17072.09 | 17263.43 | 21137.04 | 20965.86 | 0.916152 | 0.5054   | -0.12634 | Nonsignifi |
| 29482.7  | 30879.62 | 26794.43 | 19801.25 | 23700.76 | 1.026082 | 0.772454 | 0.037146 | Nonsignifi |
| 20154994 | 13096398 | 10353798 | 19262232 | 11812828 | 1.106071 | 0.519208 | 0.145444 | Nonsignifi |
| 204013.7 | 301063.8 | 303291.9 | 322841.6 | 155880.1 | 0.825475 | 0.14929  | -0.2767  | Nonsignifi |
| 21918.44 | 12179.83 | 13038.6  | 19338.66 | 20528.34 | 0.768442 | 0.12461  | -0.37999 | Nonsignifi |
| 23368.96 | 19681.86 | 23561.02 | 19356.37 | 24012.56 | 0.895806 | 0.183018 | -0.15874 | Nonsignifi |
| 48051.85 | 38920.16 | 35293.39 | 54158.86 | 30354.36 | 1.193692 | 0.078952 | 0.255431 | Nonsignifi |
| 18671406 | 1536575  | 21621488 | 1489528  | 11605102 | 1.011929 | 0.967508 | 0.017107 | Nonsignifi |
| 0        | 120178   | 118081.3 | 188809.4 | 151527.6 | 1.293382 | 0.259218 | 0.371148 | Nonsignifi |
| 11467.53 | 6405.798 | 15147.83 | 8548.322 | 10837.67 | 1.276253 | 0.532792 | 0.351915 | Nonsignifi |
| 370055.9 | 82409.38 | 79043.45 | 72475.11 | 78762.47 | 1.27138  | 0.507285 | 0.346395 | Nonsignifi |
| 36381.73 | 39108.11 | 34554.49 | 38788.57 | 36816.35 | 0.77673  | 0.009949 | -0.36452 | Nonsignifi |
| 66134.7  | 7571.687 | 14539.52 | 13144.32 | 9822.972 | 0.697795 | 0.426711 | -0.51912 | Nonsignifi |
| 30480.26 | 38078.35 | 0        | 0        | 0        | 222.1201 | 0.168628 | 7.795196 | Nonsignifi |
| 507641.5 | 589241.1 | 1478339  | 702604.5 | 708074.1 | 0.973921 | 0.879809 | -0.03812 | Nonsignifi |
| 294996.8 | 360945   | 630996.5 | 298440.1 | 484584.9 | 0.919413 | 0.526659 | -0.12122 | Nonsignifi |
| 154043.8 | 119484   | 205349.3 | 193842.4 | 202744.9 | 0.707853 | 0.017854 | -0.49848 | Nonsignifi |
| 17161946 | 4582531  | 5117707  | 10734233 | 3689177  | 0.887529 | 0.652608 | -0.17213 | Nonsignifi |
| 19028540 | 15398260 | 14638816 | 16288024 | 12060362 | 1.022044 | 0.708577 | 0.031457 | Nonsignifi |
| 687512.4 | 842669.9 | 1005813  | 130254.3 | 864742.1 | 0.703386 | 0.165944 | -0.50761 | Nonsignifi |
| 1428226  | 1247236  | 1107543  | 1730111  | 1308296  | 1.126323 | 0.414204 | 0.171621 | Nonsignifi |

|          |          |          |          |          |          |          |          |            |
|----------|----------|----------|----------|----------|----------|----------|----------|------------|
| 9793667  | 11400393 | 8187964  | 11984689 | 7765900  | 0.871878 | 0.148181 | -0.1978  | Nonsignifi |
| 102468.8 | 89055.05 | 71416.23 | 95853.58 | 64104.53 | 0.854985 | 0.093912 | -0.22603 | Nonsignifi |
| 39317.29 | 49635.68 | 39097.16 | 42779.86 | 42139.44 | 1.019283 | 0.836458 | 0.027555 | Nonsignifi |
| 0        | 9704.38  | 10100.38 | 14885.47 | 20872.86 | 1.141062 | 0.468417 | 0.190378 | Nonsignifi |
| 463789.4 | 536586.3 | 617753.9 | 1050096  | 607168.6 | 0.592658 | 0.298795 | -0.75473 | Nonsignifi |
| 2460768  | 1035486  | 1057598  | 4642439  | 2893366  | 1.08987  | 0.691606 | 0.124157 | Nonsignifi |
| 293950.4 | 0        | 200131.9 | 115436.3 | 0        | 1.319336 | 0.337165 | 0.399812 | Nonsignifi |
| 1374568  | 1028029  | 1019748  | 1219058  | 698444.6 | 1.002188 | 0.984244 | 0.003154 | Nonsignifi |
| 84558.37 | 0        | 0        | 106707.3 | 70262.09 | 0.764771 | 0.431007 | -0.3869  | Nonsignifi |
| 0        | 0        | 9346.151 | 0        | 0        | 2.86408  | 0.230432 | 1.518072 | Nonsignifi |
| 0        | 0        | 0        | 0        | 170331.4 | 1.00384  | 0.989297 | 0.005529 | Nonsignifi |
| 6061.193 | 19568.05 | 25331.32 | 0        | 11978.45 | 0.582211 | 0.009968 | -0.78039 | Significan |
| 17839888 | 15085668 | 14521758 | 14425155 | 11428952 | 0.865725 | 0.194515 | -0.20802 | Nonsignifi |
| 18817.28 | 0        | 120529.3 | 240654.2 | 0        | 1.257413 | 0.679094 | 0.330458 | Nonsignifi |
| 25367.53 | 25872.51 | 4638.485 | 45927.25 | 2775.253 | 1.293558 | 0.540328 | 0.371345 | Nonsignifi |
| 0        | 0        | 37995.54 | 0        | 0        | 0.484491 | 0.194588 | -1.04546 | Nonsignifi |
| 11601.25 | 13245.97 | 12032.96 | 25382.5  | 13512.34 | 0.876014 | 0.322868 | -0.19097 | Nonsignifi |
| 3991276  | 4680946  | 3321131  | 8144493  | 3306953  | 0.777508 | 0.225867 | -0.36307 | Nonsignifi |
| 2092.002 | 7633.247 | 4988.611 | 4526.674 | 0        | 0.90272  | 0.878978 | -0.14765 | Nonsignifi |
| 14411.91 | 6128.164 | 7023.066 | 9010.063 | 7720.922 | 0.933841 | 0.640521 | -0.09875 | Nonsignifi |
| 13083.42 | 15699.82 | 13571.09 | 10449.4  | 14164.34 | 1.51356  | 0.219293 | 0.597946 | Nonsignifi |
| 8362.204 | 12512.42 | 8232.905 | 8095.52  | 5557.616 | 2.98183  | 0.294193 | 1.576198 | Nonsignifi |
| 13999583 | 8165126  | 6469195  | 8887853  | 7895103  | 0.861411 | 0.251041 | -0.21523 | Nonsignifi |
| 13610.16 | 15108.88 | 12317.6  | 13682.81 | 11134.85 | 1.040852 | 0.584514 | 0.057765 | Nonsignifi |
| 5753933  | 85099.2  | 5575277  | 5602710  | 4625280  | 0.733752 | 0.283226 | -0.44664 | Nonsignifi |
| 1376470  | 1251706  | 835194   | 1810241  | 1125355  | 0.659462 | 0.005815 | -0.60064 | Significan |
| 3482.225 | 3563.845 | 0        | 2652.856 | 0        | 0.988265 | 0.93389  | -0.01703 | Nonsignifi |
| 9623.219 | 25087.5  | 12889.24 | 21567.47 | 21905.49 | 1.263535 | 0.47862  | 0.337466 | Nonsignifi |
| 10000.01 | 9264.424 | 5589.222 | 11272.75 | 10551.28 | 0.877093 | 0.272669 | -0.1892  | Nonsignifi |
| 458668.4 | 888035.1 | 1033498  | 486713.5 | 477225.5 | 0.989606 | 0.943506 | -0.01507 | Nonsignifi |
| 9425.491 | 9995.905 | 9349.727 | 10407.92 | 9527.777 | 1.219203 | 0.358369 | 0.285938 | Nonsignifi |
| 60067.31 | 53422.47 | 63782.56 | 67317.78 | 61809.88 | 0.862167 | 0.271212 | -0.21396 | Nonsignifi |
| 274292.5 | 223630.8 | 185195.2 | 275969.9 | 183685.1 | 1.13758  | 0.252416 | 0.185969 | Nonsignifi |
| 33855.72 | 5121.6   | 0        | 12318.45 | 21091.72 | 2.20373  | 0.407425 | 1.139948 | Nonsignifi |
| 739268.4 | 87400.78 | 2155843  | 1828178  | 4236765  | 0.957459 | 0.925725 | -0.06272 | Nonsignifi |
| 11454.69 | 0        | 5593.173 | 10859.09 | 14272.44 | 0.868044 | 0.56791  | -0.20416 | Nonsignifi |
| 70044.8  | 49177.53 | 47475.45 | 10798.36 | 80298.21 | 0.48718  | 0.012445 | -1.03747 | Significan |
| 30430.47 | 31968.44 | 15054.24 | 30465.67 | 20533.45 | 0.883921 | 0.37862  | -0.17801 | Nonsignifi |
| 217579.8 | 443595.6 | 237224.1 | 350293.3 | 416975.6 | 0.967464 | 0.819889 | -0.04772 | Nonsignifi |
| 26103.87 | 15718.26 | 9898.905 | 25105.42 | 18283.95 | 1.459599 | 0.057542 | 0.545572 | Nonsignifi |
| 0        | 0        | 0        | 0        | 0        | 1.509209 | 0.000313 | 0.593792 | Significan |
| 3525187  | 0        | 1354442  | 3008381  | 139525.7 | 0.894479 | 0.824092 | -0.16088 | Nonsignifi |
| 222632.3 | 0        | 272099.5 | 211932.4 | 365838.5 | 0.816126 | 0.608472 | -0.29314 | Nonsignifi |
| 1211596  | 1307639  | 2906617  | 1095945  | 2228139  | 1.645423 | 0.092602 | 0.718459 | Nonsignifi |
| 24611708 | 19545630 | 21783882 | 19953192 | 16765259 | 0.813968 | 0.007684 | -0.29696 | Nonsignifi |
| 177335.5 | 134481.4 | 87853.91 | 136085.6 | 118454.3 | 1.740075 | 0.002528 | 0.79915  | Significan |
| 167560.8 | 11842.65 | 108524.7 | 106687.4 | 180773.9 | 1.569264 | 0.223077 | 0.650088 | Nonsignifi |
| 72160.34 | 66670.66 | 62929.09 | 84466.8  | 64729.02 | 0.954741 | 0.453438 | -0.06682 | Nonsignifi |
| 22252.47 | 9463.732 | 9342.229 | 10714.78 | 8902.127 | 0.668063 | 0.062619 | -0.58194 | Nonsignifi |
| 1977900  | 1935932  | 1877288  | 1998463  | 1491222  | 0.930019 | 0.311742 | -0.10467 | Nonsignifi |
| 17677.05 | 17272.5  | 19135.12 | 22026.23 | 17092.7  | 1.286336 | 0.072711 | 0.363268 | Nonsignifi |
| 351661.8 | 210718.1 | 211327.3 | 306423.1 | 168859.5 | 0.667568 | 0.08737  | -0.58301 | Nonsignifi |
| 1.22E+08 | 89377720 | 92847200 | 1.12E+08 | 99722312 | 0.728227 | 0.011259 | -0.45754 | Nonsignifi |
| 20521024 | 16193525 | 15924272 | 14248529 | 14448649 | 0.8167   | 0.07397  | -0.29212 | Nonsignifi |
| 1713451  | 112374.3 | 10232867 | 12221754 | 4332471  | 0.207498 | 0.122666 | -2.26883 | Nonsignifi |
| 458222.6 | 364433.3 | 371488.3 | 406359.3 | 345744   | 0.91117  | 0.358609 | -0.13421 | Nonsignifi |
| 5143728  | 5529897  | 4339940  | 5069797  | 4216563  | 0.911629 | 0.918589 | -0.13348 | Nonsignifi |
| 3177846  | 5158317  | 1914558  | 3699890  | 2014442  | 1.576672 | 0.02952  | 0.656882 | Significan |

|          |          |          |          |          |          |          |          |             |
|----------|----------|----------|----------|----------|----------|----------|----------|-------------|
| 183698.9 | 284242.1 | 364944.8 | 128135.3 | 223711.8 | 1.319693 | 0.151522 | 0.400202 | Nonsignifi  |
| 10224243 | 26911404 | 19572796 | 6914114  | 11597712 | 1.128422 | 0.525118 | 0.174307 | Nonsignifi  |
| 51022.8  | 38051.72 | 23160.96 | 24770.67 | 32671.94 | 0.939316 | 0.639745 | -0.09032 | Nonsignifi  |
| 61831.44 | 41838.2  | 25600.38 | 49056.58 | 54868.57 | 0.756787 | 0.165537 | -0.40204 | Nonsignifi  |
| 0        | 0        | 0        | 0        | 50073.03 | 0.963945 | 0.840711 | -0.05298 | Nonsignifi  |
| 155647.6 | 156886.2 | 190469.3 | 143523.9 | 143339.2 | 0.909619 | 0.305088 | -0.13667 | Nonsignifi  |
| 50598.29 | 45137.95 | 38070.78 | 53727.39 | 47935.94 | 1.047918 | 0.825251 | 0.067526 | Nonsignifi  |
| 1140522  | 1095984  | 996066.4 | 1457491  | 846790.1 | 0.952898 | 0.542528 | -0.06961 | Nonsignifi  |
| 47422.31 | 51988    | 91761.68 | 48534.29 | 38664.79 | 1.077919 | 0.665772 | 0.108248 | Nonsignifi  |
| 40784.67 | 0        | 0        | 44952.45 | 42632.98 | 0.540576 | 0.601837 | -0.88743 | Nonsignifi  |
| 481085.8 | 6389174  | 298082.9 | 217903.1 | 498052.3 | 0.407915 | 0.203005 | -1.29366 | Nonsignifi  |
| 444312.6 | 188545.9 | 262942.4 | 336209.5 | 401763.7 | 1.28107  | 0.142023 | 0.357349 | Nonsignifi  |
| 11973.54 | 13150.93 | 0        | 10694.8  | 0        | 0.86238  | 0.453666 | -0.2136  | Nonsignifi  |
| 40219.88 | 38529.27 | 32194.97 | 41666.76 | 70984.43 | 0.898497 | 0.590739 | -0.15441 | Nonsignifi  |
| 25411.68 | 20788.24 | 19505.38 | 23567.09 | 23930.52 | 0.967123 | 0.766424 | -0.04823 | Nonsignifi  |
| 157398.5 | 400288.8 | 140754   | 246945.7 | 165556.6 | 0.955122 | 0.843247 | -0.06624 | Nonsignifi  |
| 5377.875 | 0        | 0        | 7194.465 | 5063.504 | 1.084865 | 0.608482 | 0.117515 | Nonsignifi  |
| 0        | 0        | 13922.46 | 0        | 0        | 0.672375 | 0.614558 | -0.57266 | Nonsignifi  |
| 4818425  | 3032144  | 4113540  | 4250683  | 3638901  | 0.82906  | 0.326231 | -0.27045 | Nonsignifi  |
| 48121.44 | 43792.57 | 40242.5  | 2189.771 | 1767.852 | 1.237252 | 0.683713 | 0.307139 | Nonsignifi  |
| 17881.01 | 13540.91 | 12119.53 | 14145.46 | 10510.91 | 0.902735 | 0.400011 | -0.14763 | Nonsignifi  |
| 174632.2 | 157036.1 | 292382.4 | 148183   | 239181.5 | 0.78812  | 0.391218 | -0.34351 | Nonsignifi  |
| 1039040  | 269388.8 | 460989.8 | 593265.4 | 692307   | 0.91305  | 0.716715 | -0.13123 | Nonsignifi  |
| 124530.9 | 109295.3 | 147952.4 | 122193.1 | 15290.48 | 1.094912 | 0.577953 | 0.130815 | Nonsignifi  |
| 1052318  | 1034661  | 761043   | 886828.9 | 808713.5 | 0.812846 | 0.091343 | -0.29895 | Nonsignifi  |
| 0        | 3003.923 | 0        | 0        | 5878.624 | 0.841096 | 0.41936  | -0.24966 | Nonsignifi  |
| 147718.3 | 112150.5 | 125058.7 | 111131.6 | 91356.14 | 0.790742 | 0.027817 | -0.33872 | Nonsignifi  |
| 0        | 57500.9  | 0        | 3761.608 | 1535.278 | 1.658808 | 0.311862 | 0.730147 | Nonsignifi  |
| 23368.99 | 19681.89 | 23561.07 | 19356.38 | 24012.53 | 0.89     | 0.197771 | -0.16812 | Nonsignifi  |
| 4260.883 | 2649.162 | 3942.413 | 3092.094 | 0        | 0.757748 | 0.225163 | -0.40021 | Nonsignifi  |
| 1674508  | 2409186  | 2444248  | 1770227  | 3006832  | 0.765636 | 0.194517 | -0.38527 | Nonsignifi  |
| 3213354  | 2589175  | 1477039  | 844046.4 | 1758647  | 1.285541 | 0.223079 | 0.362376 | Nonsignifi  |
| 616703.3 | 518989.8 | 393136.6 | 410435.4 | 396095.7 | 0.830599 | 0.285439 | -0.26778 | Nonsignifi  |
| 633211.5 | 547944.9 | 386345.1 | 589469.1 | 474676.9 | 0.994588 | 0.947065 | -0.00783 | Nonsignifi  |
| 2904663  | 1913651  | 1623303  | 2170896  | 1555475  | 0.873377 | 0.29822  | -0.19532 | Nonsignifi  |
| 0        | 0        | 0        | 0        | 2100.579 | 1.929876 | 0.156697 | 0.948508 | Nonsignifi  |
| 0        | 26951.37 | 37226.82 | 36414.01 | 0        | 0.62247  | 0.299905 | -0.68392 | Nonsignifi  |
| 39647.78 | 15072.71 | 49035.45 | 32049.55 | 57938.96 | 1.038712 | 0.878928 | 0.054795 | Nonsignifi  |
| 42769.15 | 38895.41 | 31612.48 | 43031.28 | 40316.85 | 1.042392 | 0.698264 | 0.059897 | Nonsignifi  |
| 2997.04  | 0        | 21974.41 | 2337.332 | 51206.69 | 0.636548 | 0.47413  | -0.65166 | Nonsignifi  |
| 103697.2 | 125629.6 | 61113.86 | 44372.79 | 39868.56 | 1.551049 | 0.054566 | 0.633244 | Nonsignifi  |
| 0        | 0        | 0        | 860.3972 | 0        | 4.016219 | 0.274294 | 2.005838 | Nonsignifi  |
| 5285350  | 3728170  | 4066721  | 5369265  | 4148747  | 0.980173 | 0.754024 | -0.02889 | Nonsignifi  |
| 1.92E+08 | 1.41E+08 | 77278336 | 38638344 | 79189568 | 0.858827 | 0.537028 | -0.21956 | Nonsignifi  |
| 40297180 | 29324096 | 14775153 | 7516023  | 14270974 | 0.594821 | 0.091536 | -0.74947 | Nonsignifi  |
| 242530.6 | 203655.3 | 193806.8 | 257582.2 | 177364.4 | 0.996142 | 0.960604 | -0.00558 | Nonsignifi  |
| 6424872  | 4778519  | 6624800  | 6928198  | 4980261  | 0.881203 | 0.080979 | -0.18245 | Nonsignifi  |
| 586928.8 | 438944   | 561394.9 | 419647.3 | 1061278  | 1.107031 | 0.538079 | 0.146696 | Nonsignifi  |
| 5361.505 | 8728.792 | 14546.13 | 11308.59 | 10687.26 | 2.419103 | 0.018836 | 1.274472 | Significant |
| 35838656 | 23997682 | 22151762 | 33854548 | 22856212 | 1.047957 | 0.643648 | 0.067579 | Nonsignifi  |
| 65754972 | 59236108 | 46088352 | 51278772 | 44119652 | 0.811406 | 0.050683 | -0.3015  | Nonsignifi  |
| 1574357  | 1262013  | 1053904  | 1449178  | 1238852  | 0.990247 | 0.891283 | -0.01414 | Nonsignifi  |
| 4596616  | 6341658  | 7188203  | 6495847  | 7619584  | 0.883908 | 0.389403 | -0.17803 | Nonsignifi  |
| 293710.3 | 494510.1 | 362818.3 | 400351.6 | 476634.5 | 1.107056 | 0.618693 | 0.146729 | Nonsignifi  |
| 576671.2 | 600089.7 | 689738.9 | 625071.6 | 616282   | 1.44561  | 0.061108 | 0.531678 | Nonsignifi  |
| 325961.8 | 987027.7 | 322071.3 | 608101.3 | 1989438  | 0.428479 | 0.152263 | -1.2227  | Nonsignifi  |
| 394871.9 | 234119.5 | 684206.1 | 256389.4 | 205205.1 | 1.12464  | 0.709316 | 0.169463 | Nonsignifi  |
| 81408.2  | 263473.8 | 657655.6 | 237502.5 | 192198.8 | 1.108477 | 0.752934 | 0.148579 | Nonsignifi  |

|          |          |          |          |          |          |          |          |            |
|----------|----------|----------|----------|----------|----------|----------|----------|------------|
| 20659.94 | 22934.27 | 39451.13 | 0        | 26379.39 | 1.104356 | 0.611399 | 0.143205 | Nonsignifi |
| 77260.52 | 62193.67 | 67289.86 | 112573.3 | 60362.52 | 0.815203 | 0.2104   | -0.29477 | Nonsignifi |
| 40034264 | 58472536 | 46888284 | 43565612 | 63737736 | 0.846181 | 0.413122 | -0.24096 | Nonsignifi |
| 11013.17 | 7527.082 | 11690.11 | 2981.158 | 8859.567 | 1.263971 | 0.193166 | 0.337963 | Nonsignifi |
| 235616.6 | 3421158  | 225904   | 130097.8 | 261454.7 | 0.400617 | 0.130194 | -1.31971 | Nonsignifi |
| 30284496 | 3869710  | 23580774 | 26587308 | 19504436 | 0.744625 | 0.242828 | -0.42541 | Nonsignifi |
| 41050756 | 48055052 | 80789416 | 38723660 | 44440792 | 0.872159 | 0.25506  | -0.19734 | Nonsignifi |
| 1.01E+08 | 1.18E+08 | 2.08E+08 | 88393160 | 1.11E+08 | 0.816283 | 0.098111 | -0.29286 | Nonsignifi |
| 68389520 | 76926112 | 1.34E+08 | 67388840 | 79653888 | 0.809248 | 0.050845 | -0.30535 | Nonsignifi |
| 2225797  | 7189323  | 3452428  | 1529627  | 5130725  | 0.865069 | 0.531055 | -0.20911 | Nonsignifi |
| 514296.6 | 477317.6 | 613786.3 | 920571.6 | 603443.1 | 0.897071 | 0.444741 | -0.15671 | Nonsignifi |
| 7850929  | 9851279  | 6505413  | 6267168  | 7107996  | 0.809561 | 0.096517 | -0.30479 | Nonsignifi |
| 5618966  | 3178728  | 14372135 | 2931964  | 4922527  | 0.963385 | 0.876856 | -0.05382 | Nonsignifi |
| 5404588  | 2708480  | 3966357  | 4303820  | 4516854  | 0.902672 | 0.332424 | -0.14773 | Nonsignifi |
| 3773195  | 3174594  | 4129582  | 4935911  | 3688242  | 1.059269 | 0.602141 | 0.083069 | Nonsignifi |
| 70465016 | 76211064 | 69237400 | 77501312 | 67352128 | 0.874471 | 0.268538 | -0.19352 | Nonsignifi |
| 1.89E+09 | 1.47E+09 | 1.36E+09 | 1.62E+09 | 1.22E+09 | 0.925211 | 0.622878 | -0.11215 | Nonsignifi |
| 118442.6 | 141756.7 | 87029.25 | 108093   | 91438.22 | 1.082539 | 0.503183 | 0.114419 | Nonsignifi |
| 1.12E+08 | 1.13E+08 | 1.11E+08 | 1.17E+08 | 84148392 | 0.976602 | 0.861379 | -0.03416 | Nonsignifi |
| 61385868 | 45054412 | 37980704 | 53983724 | 44461152 | 0.909058 | 0.292252 | -0.13756 | Nonsignifi |
| 57142.41 | 54796.25 | 55677.61 | 74801.91 | 62000.21 | 1.0626   | 0.720718 | 0.087599 | Nonsignifi |
| 138212.3 | 70196.83 | 109745   | 168154.3 | 94678.95 | 1.15703  | 0.151085 | 0.210426 | Nonsignifi |
| 12859911 | 11788362 | 8414528  | 15253364 | 9914557  | 0.870128 | 0.115129 | -0.2007  | Nonsignifi |
| 4836062  | 2254995  | 2889220  | 2968368  | 2205756  | 1.037221 | 0.800938 | 0.052724 | Nonsignifi |
| 14247025 | 11684838 | 9652415  | 12702467 | 11341656 | 0.940798 | 0.508753 | -0.08804 | Nonsignifi |
| 524262.5 | 440852.5 | 2242074  | 527748.6 | 957200.9 | 0.822648 | 0.551965 | -0.28165 | Nonsignifi |
| 724219   | 1118549  | 3282364  | 687933.2 | 1205593  | 0.791758 | 0.424209 | -0.33687 | Nonsignifi |
| 107917.5 | 96971.01 | 134813.1 | 141291.3 | 118441.1 | 0.982305 | 0.818904 | -0.02576 | Nonsignifi |
| 3993.789 | 11969.74 | 74680.54 | 21054.58 | 15050.53 | 1.561861 | 0.4338   | 0.643266 | Nonsignifi |
| 559362.4 | 425804.2 | 364297.1 | 552598.9 | 546304.3 | 0.854705 | 0.069516 | -0.2265  | Nonsignifi |
| 4150653  | 2711741  | 2368396  | 2513564  | 2149783  | 0.862012 | 0.213557 | -0.21422 | Nonsignifi |
| 476056.8 | 8041446  | 315842.7 | 261859.6 | 602712.6 | 0.415576 | 0.248237 | -1.26682 | Nonsignifi |
| 61448.4  | 43389.14 | 49794.99 | 55884.4  | 49448.08 | 1.0534   | 0.266479 | 0.075054 | Nonsignifi |
| 475471.3 | 569793.1 | 1814467  | 657392.6 | 999362.4 | 0.635119 | 0.206927 | -0.6549  | Nonsignifi |
| 1950951  | 3169822  | 2161159  | 3254447  | 1581313  | 0.752786 | 0.294028 | -0.40969 | Nonsignifi |
| 31462.86 | 25158.39 | 28540.43 | 38602.93 | 34227.36 | 0.823508 | 0.211782 | -0.28015 | Nonsignifi |
| 6782.807 | 0        | 0        | 0        | 0        | 0.919964 | 0.910064 | -0.12035 | Nonsignifi |
| 658693.1 | 602400.6 | 533813.8 | 638176.9 | 454716.2 | 0.894261 | 0.152243 | -0.16123 | Nonsignifi |
| 856352.4 | 655478.3 | 653896.4 | 811292.9 | 558029.7 | 1.042679 | 0.588643 | 0.060296 | Nonsignifi |
| 22062.3  | 0        | 47329    | 0        | 35314.75 | 1.280941 | 0.534482 | 0.357204 | Nonsignifi |
| 17081.9  | 21292.93 | 33408.86 | 25743.55 | 23557.66 | 1.0374   | 0.851363 | 0.052972 | Nonsignifi |
| 10398.29 | 18519.86 | 381787.2 | 25880.45 | 9806.629 | 1.673568 | 0.574497 | 0.742928 | Nonsignifi |
| 2023260  | 6336647  | 1443831  | 2375985  | 2978009  | 0.639766 | 0.280413 | -0.64438 | Nonsignifi |
| 0        | 7508.334 | 0        | 0        | 17533.16 | 1.440998 | 0.694394 | 0.527068 | Nonsignifi |
| 6339958  | 4707205  | 4967951  | 5659416  | 4695612  | 0.876343 | 0.039811 | -0.19043 | Nonsignifi |
| 5258.934 | 6808.012 | 4612.098 | 3382.227 | 5603.787 | 0.850127 | 0.707866 | -0.23425 | Nonsignifi |
| 4406574  | 4133185  | 4411123  | 5170887  | 4022796  | 0.813597 | 0.003255 | -0.29761 | Nonsignifi |
| 112445.6 | 14522.14 | 466309.5 | 207177.8 | 0        | 0.521206 | 0.291138 | -0.94007 | Nonsignifi |
| 14253.85 | 34967.34 | 27631.62 | 12963.02 | 37967.95 | 1.073367 | 0.735011 | 0.102143 | Nonsignifi |
| 3324024  | 2829750  | 2799258  | 3542118  | 2876802  | 1.040701 | 0.66326  | 0.057555 | Nonsignifi |
| 165540.4 | 338872   | 969652.4 | 1021611  | 662983.8 | 0.436971 | 0.053786 | -1.19439 | Nonsignifi |
| 13266623 | 8025931  | 7601297  | 15284453 | 9557869  | 0.89123  | 0.340811 | -0.16613 | Nonsignifi |
| 8133927  | 36059136 | 13838885 | 8050856  | 13293228 | 0.748333 | 0.347172 | -0.41825 | Nonsignifi |
| 657577.4 | 2815837  | 416296.7 | 267815.7 | 1021478  | 0.816714 | 0.573617 | -0.2921  | Nonsignifi |
| 298071.1 | 250656.9 | 588822.4 | 278592.1 | 1178954  | 0.962548 | 0.871869 | -0.05507 | Nonsignifi |
| 349190.4 | 534287   | 500159.9 | 482980   | 553468.2 | 1.08434  | 0.520991 | 0.116817 | Nonsignifi |
| 397898.2 | 1147011  | 9598586  | 13273345 | 19710896 | 1.507706 | 0.436311 | 0.592355 | Nonsignifi |
| 65973.42 | 80551.14 | 127464   | 99599.34 | 232769.7 | 1.611837 | 0.117766 | 0.688706 | Nonsignifi |

|          |          |          |          |          |          |          |          |            |
|----------|----------|----------|----------|----------|----------|----------|----------|------------|
| 0        | 136335.7 | 2704552  | 0        | 287738.7 | 0.44806  | 0.209911 | -1.15824 | Nonsignifi |
| 6727978  | 6697301  | 33926944 | 27169700 | 32509602 | 1.426074 | 0.064164 | 0.512049 | Nonsignifi |
| 13430261 | 14970247 | 4397174  | 4918636  | 3945393  | 0.607436 | 0.040469 | -0.7192  | Significan |
| 282739.4 | 207426.3 | 204579   | 170042.5 | 267906   | 0.986759 | 0.940895 | -0.01923 | Nonsignifi |
| 35298.73 | 206352.8 | 27192.68 | 17359.51 | 39952.73 | 1.148472 | 0.740938 | 0.199715 | Nonsignifi |
| 0        | 0        | 0        | 177474.2 | 0        | 1.463089 | 0.086976 | 0.549018 | Nonsignifi |
| 7002.581 | 4758.475 | 7154.901 | 5929.169 | 7290.993 | 1.127133 | 0.457721 | 0.172658 | Nonsignifi |
| 15956.16 | 16271.51 | 20018.58 | 27506.31 | 17470.55 | 1.09362  | 0.511086 | 0.129112 | Nonsignifi |
| 173904.7 | 297663.8 | 348288.2 | 85671.7  | 379582.3 | 0.821075 | 0.391475 | -0.28441 | Nonsignifi |
| 0        | 0        | 8926.939 | 0        | 0        | 1.249382 | 0.747139 | 0.321214 | Nonsignifi |
| 17587.31 | 14329.66 | 8444.787 | 17057.35 | 13780.71 | 1.002596 | 0.975147 | 0.00374  | Nonsignifi |
| 123452.7 | 2782275  | 161304.9 | 107300.5 | 182650.4 | 0.43675  | 0.219377 | -1.19512 | Nonsignifi |
| 24599.84 | 243312.8 | 11639.67 | 12695.52 | 16898.44 | 0.801009 | 0.61111  | -0.32011 | Nonsignifi |
| 942851.9 | 1179880  | 1021675  | 1019479  | 786217.4 | 0.990848 | 0.900949 | -0.01326 | Nonsignifi |
| 16653.9  | 20212.19 | 35878.54 | 28155.61 | 22834.19 | 1.010577 | 0.96413  | 0.015179 | Nonsignifi |
| 19405.25 | 17281.51 | 41136.23 | 19322.79 | 33803.29 | 1.987327 | 0.353707 | 0.990829 | Nonsignifi |
| 9570.567 | 27659.66 | 24047.29 | 33552.41 | 55045.25 | 0.669473 | 0.400823 | -0.5789  | Nonsignifi |
| 458035.5 | 500250.7 | 429013.5 | 520573.1 | 431663.6 | 1.216669 | 0.032233 | 0.282937 | Nonsignifi |
| 176194.6 | 261246.8 | 383968.2 | 307862.1 | 220395.8 | 1.431223 | 0.226503 | 0.517249 | Nonsignifi |
| 0        | 21362.14 | 0        | 0        | 2282.734 | 40.57951 | 0.07755  | 5.342679 | Nonsignifi |
| 55141.29 | 32012.2  | 44823.25 | 71458.76 | 61087.75 | 0.829212 | 0.349999 | -0.27019 | Nonsignifi |
| 1397892  | 1605016  | 1350788  | 947068.6 | 1182982  | 0.755193 | 0.023769 | -0.40508 | Nonsignifi |
| 12977.38 | 13644.6  | 11842.85 | 14949.2  | 23577.3  | 1.153855 | 0.415267 | 0.206461 | Nonsignifi |
| 4194066  | 4270564  | 3365351  | 4296302  | 3249284  | 1.134847 | 0.22369  | 0.182498 | Nonsignifi |
| 7816831  | 5747709  | 5731332  | 8026249  | 6262953  | 0.980563 | 0.768912 | -0.02832 | Nonsignifi |
| 0        | 0        | 0        | 2813.747 | 0        | 1.275494 | 0.803967 | 0.351056 | Nonsignifi |
| 640369.2 | 609436.6 | 424295.6 | 760070.4 | 502850.6 | 1.007962 | 0.909994 | 0.011441 | Nonsignifi |
| 8222.013 | 11196.38 | 13893.9  | 10023.12 | 9395.199 | 0.520921 | 0.531001 | -0.94086 | Nonsignifi |
| 1127081  | 1154114  | 887361.4 | 1142213  | 982449.8 | 0.895975 | 0.088066 | -0.15847 | Nonsignifi |
| 5420801  | 13794234 | 5516944  | 12510798 | 6290617  | 0.770088 | 0.188369 | -0.37691 | Nonsignifi |
| 135959   | 175055.3 | 365109   | 183570.8 | 199504.7 | 0.93169  | 0.639878 | -0.10208 | Nonsignifi |
| 6343.075 | 0        | 8157.792 | 6452.246 | 5316.523 | 1.066417 | 0.816563 | 0.092772 | Nonsignifi |
| 7497.023 | 8538.104 | 7848.301 | 11231.48 | 7593.394 | 0.93471  | 0.679161 | -0.09741 | Nonsignifi |
| 4875.533 | 5230.214 | 5407.762 | 25140.02 | 0        | 0.892755 | 0.825971 | -0.16366 | Nonsignifi |
| 41885.68 | 26893.27 | 35133.8  | 29711.19 | 23946.33 | 0.900067 | 0.436637 | -0.1519  | Nonsignifi |
| 36948.36 | 54176.84 | 25040.17 | 30770    | 18668.58 | 1.124487 | 0.746619 | 0.169267 | Nonsignifi |
| 4480032  | 3275598  | 2718534  | 3506246  | 3798046  | 0.900541 | 0.381324 | -0.15114 | Nonsignifi |
| 13530.83 | 18186.51 | 17472.96 | 15959.06 | 11814.41 | 0.992765 | 0.956471 | -0.01048 | Nonsignifi |
| 0        | 15787.64 | 52977.57 | 1374.666 | 0        | 0.442185 | 0.364857 | -1.17728 | Nonsignifi |
| 64537.48 | 84151.16 | 47266.89 | 59493.9  | 59167.26 | 0.895488 | 0.257278 | -0.15925 | Nonsignifi |
| 94243.55 | 136284.5 | 98593.16 | 100075.8 | 93350.6  | 0.863264 | 0.196133 | -0.21213 | Nonsignifi |
| 24312.87 | 20474.4  | 19209.08 | 20417.32 | 25574.21 | 1.011862 | 0.898663 | 0.017013 | Nonsignifi |
| 204280.2 | 1889077  | 164115.6 | 127906.8 | 230084.3 | 0.44196  | 0.143843 | -1.17801 | Nonsignifi |
| 1473553  | 1100843  | 898732.7 | 800599.6 | 611090.3 | 1.089078 | 0.537343 | 0.123108 | Nonsignifi |
| 46892.28 | 689053.8 | 90102.57 | 44426.38 | 71553.75 | 0.556775 | 0.237892 | -0.84483 | Nonsignifi |
| 228126   | 214721.7 | 209070.4 | 313455.6 | 242135.6 | 1.000401 | 0.996168 | 0.000578 | Nonsignifi |
| 2568376  | 2071059  | 1491614  | 1880483  | 2078175  | 1.014777 | 0.854439 | 0.021163 | Nonsignifi |
| 110930   | 89297.14 | 99401.83 | 93334.11 | 94024.33 | 1.077205 | 0.350351 | 0.107293 | Nonsignifi |
| 0        | 0        | 0        | 0        | 2377.843 | 2.359757 | 0.086739 | 1.238638 | Nonsignifi |
| 648610.4 | 716371.4 | 493414.7 | 947529.6 | 623510.4 | 1.041833 | 0.747826 | 0.059125 | Nonsignifi |
| 449276.7 | 278422   | 510999.3 | 374987.2 | 375400.8 | 1.244732 | 0.297619 | 0.315835 | Nonsignifi |
| 14027.24 | 3700.017 | 5449.462 | 0        | 0        | 1.140354 | 0.681283 | 0.189481 | Nonsignifi |
| 394222.9 | 357663.4 | 360093.4 | 455791.7 | 352294.8 | 0.951592 | 0.464751 | -0.07159 | Nonsignifi |
| 9119.226 | 1002.32  | 5191.84  | 0        | 8479.084 | 1.163586 | 0.587571 | 0.218578 | Nonsignifi |
| 169738   | 123564.9 | 111598.4 | 149604.8 | 131330.9 | 0.793632 | 0.18606  | -0.33346 | Nonsignifi |
| 0        | 0        | 7438.354 | 6449.88  | 0        | 0.67986  | 0.437245 | -0.55669 | Nonsignifi |
| 1314440  | 1112323  | 1305194  | 1255325  | 1016242  | 0.919931 | 0.580163 | -0.1204  | Nonsignifi |
| 36759.1  | 157175.3 | 0        | 0        | 56142.82 | 0.895997 | 0.91369  | -0.15843 | Nonsignifi |

|          |          |          |          |          |          |          |          |            |
|----------|----------|----------|----------|----------|----------|----------|----------|------------|
| 399460.7 | 249893.4 | 275507.9 | 394383.5 | 355185.6 | 1.051114 | 0.593084 | 0.071919 | Nonsignifi |
| 827685   | 866597.7 | 857241.9 | 1100172  | 1021240  | 0.976725 | 0.876819 | -0.03398 | Nonsignifi |
| 0        | 0        | 0        | 0        | 17089.4  | 0.706119 | 0.484433 | -0.50202 | Nonsignifi |
| 34557.53 | 16704.95 | 13111.75 | 6721.354 | 22197.26 | 0.60565  | 0.119594 | -0.72344 | Nonsignifi |
| 1988.401 | 7522.69  | 0        | 0        | 0        | 0.133059 | 0.382955 | -2.90987 | Nonsignifi |
| 107820.7 | 78821.84 | 81766.38 | 92687.02 | 95296.85 | 0.777486 | 0.173899 | -0.36311 | Nonsignifi |
| 7574.449 | 10779.56 | 19679.57 | 21147.35 | 18253.45 | 0.465607 | 0.004556 | -1.10282 | Significan |
| 338691.3 | 6702391  | 155911.3 | 0        | 367816.1 | 0.260423 | 0.12445  | -1.94107 | Nonsignifi |
| 0        | 172038.6 | 0        | 93646.39 | 112784.4 | 0.410173 | 0.090242 | -1.2857  | Nonsignifi |
| 1031221  | 775666.8 | 843446.4 | 1582318  | 2071737  | 0.949913 | 0.75719  | -0.07413 | Nonsignifi |
| 1260070  | 975806.7 | 1623930  | 739638   | 1049106  | 1.364688 | 0.181183 | 0.448571 | Nonsignifi |
| 776742.9 | 73074.88 | 62688.4  | 712171.5 | 1593648  | 1.186679 | 0.73956  | 0.246929 | Nonsignifi |
| 1325912  | 1945478  | 2414804  | 1360577  | 1515080  | 0.951272 | 0.750229 | -0.07207 | Nonsignifi |
| 150877.2 | 34837.61 | 607462.6 | 68542.92 | 179153.8 | 1.172467 | 0.718872 | 0.229547 | Nonsignifi |
| 459469.5 | 564137.1 | 1102130  | 809226.5 | 633299.1 | 0.76241  | 0.326849 | -0.39136 | Nonsignifi |
| 9894.354 | 32604.75 | 0        | 31734.93 | 0        | 2.135479 | 0.261105 | 1.094559 | Nonsignifi |
| 861831.4 | 1028323  | 845541   | 1174776  | 791110.1 | 0.900261 | 0.614221 | -0.15158 | Nonsignifi |
| 137662.6 | 167200.8 | 173401.5 | 169756.3 | 109662.5 | 1.542441 | 0.041399 | 0.625216 | Significan |
| 365287.8 | 376648.8 | 679476.6 | 478759   | 633731.4 | 1.516342 | 0.068667 | 0.600596 | Nonsignifi |
| 2831854  | 1720742  | 3740552  | 1262795  | 2285494  | 1.177687 | 0.302592 | 0.235956 | Nonsignifi |
| 199535.9 | 45711.46 | 175660.7 | 197625   | 568485.7 | 1.863649 | 0.10865  | 0.89813  | Nonsignifi |
| 131984.1 | 369667.1 | 278760.3 | 323420   | 259803.7 | 1.318326 | 0.166643 | 0.398707 | Nonsignifi |
| 0        | 45929.84 | 9465.029 | 31688.23 | 0        | 1.864489 | 0.551529 | 0.89878  | Nonsignifi |
| 2655.152 | 4000.987 | 3567.365 | 2769.895 | 3373.324 | 0.895517 | 0.687153 | -0.15921 | Nonsignifi |
| 92320.33 | 50187.94 | 85299.57 | 98835.74 | 70719.2  | 1.211653 | 0.228504 | 0.276976 | Nonsignifi |
| 5189038  | 4906523  | 2711.798 | 21268.32 | 26445.89 | 0.727565 | 0.755615 | -0.45885 | Nonsignifi |
| 309375.3 | 1382994  | 6063.48  | 395006.2 | 257453.9 | 0.751968 | 0.570854 | -0.41126 | Nonsignifi |
| 673512.7 | 677843.9 | 431958.1 | 781663.3 | 626532   | 1.044558 | 0.729238 | 0.062892 | Nonsignifi |
| 0        | 19378.68 | 0        | 4472291  | 17567.81 | 0.440261 | 0.657819 | -1.18357 | Nonsignifi |
| 665237.1 | 613562   | 721709.9 | 626795.4 | 631483.8 | 1.079121 | 0.257416 | 0.109857 | Nonsignifi |
| 13177.66 | 15008.85 | 18258.15 | 12485.76 | 15879.31 | 0.990796 | 0.943868 | -0.01334 | Nonsignifi |
| 33225.21 | 28105.52 | 37376.7  | 59640.29 | 27266.08 | 0.738024 | 0.10862  | -0.43826 | Nonsignifi |
| 1147594  | 837101.6 | 653290   | 831819.2 | 760839.9 | 0.922748 | 0.561882 | -0.11599 | Nonsignifi |
| 128890   | 101169   | 70836.07 | 31530.88 | 714969.1 | 0.483526 | 0.254623 | -1.04834 | Nonsignifi |
| 0        | 0        | 0        | 0        | 0        | 1.18755  | 0.743613 | 0.247988 | Nonsignifi |
| 298561   | 410887.7 | 104637.5 | 166219.1 | 464070.8 | 1.066745 | 0.712734 | 0.093215 | Nonsignifi |
| 211044.2 | 261198   | 491372.3 | 188071.2 | 424912.3 | 1.528442 | 0.125499 | 0.612062 | Nonsignifi |
| 0        | 0        | 0        | 355893.7 | 0        | 1.176936 | 0.818862 | 0.235036 | Nonsignifi |
| 743357.1 | 397622.8 | 571824.5 | 740583.9 | 639127.6 | 0.7556   | 0.087365 | -0.4043  | Nonsignifi |
| 2822775  | 1187519  | 1651861  | 364411.7 | 1466466  | 0.662356 | 0.259597 | -0.59432 | Nonsignifi |
| 5520762  | 4819639  | 5647857  | 5499759  | 4825327  | 0.990265 | 0.925799 | -0.01411 | Nonsignifi |
| 72642.01 | 178084.7 | 122635   | 140315.6 | 82851.95 | 2.227598 | 0.010251 | 1.155489 | Significan |
| 0        | 6022.859 | 0        | 0        | 1        | 0.481158 | 0.505473 | -1.05542 | Nonsignifi |
| 37817.78 | 25452.88 | 343494.3 | 37243.33 | 73122.04 | 0.710659 | 0.465068 | -0.49277 | Nonsignifi |
| 67041.34 | 70699.65 | 212336.5 | 371337   | 236542.6 | 1.613481 | 0.094134 | 0.690176 | Nonsignifi |
| 18770112 | 17976668 | 17406346 | 14159314 | 13085886 | 0.84256  | 0.266318 | -0.24715 | Nonsignifi |
| 18825.37 | 10229.51 | 16057.37 | 0        | 8043.106 | 1.301925 | 0.267721 | 0.380646 | Nonsignifi |
| 367139.7 | 302744.3 | 436196.3 | 359008.6 | 647168.4 | 0.882063 | 0.389704 | -0.18105 | Nonsignifi |
| 3314251  | 2203138  | 2131833  | 1484208  | 2098191  | 0.994537 | 0.97019  | -0.0079  | Nonsignifi |
| 965041.8 | 1476897  | 2371965  | 609541.4 | 900978.8 | 1.641874 | 0.083526 | 0.715344 | Nonsignifi |
| 261344.5 | 217546.9 | 422086.6 | 182645.4 | 88864.73 | 0.846988 | 0.607237 | -0.23959 | Nonsignifi |
| 15380476 | 14187344 | 13315718 | 7633230  | 9512817  | 0.793922 | 0.122707 | -0.33293 | Nonsignifi |
| 12899.1  | 40327.92 | 120473.4 | 75143.63 | 28991.57 | 3.235956 | 0.040658 | 1.694192 | Significan |
| 341158.3 | 161280.5 | 139778.3 | 149072   | 194751.8 | 1.000977 | 0.994833 | 0.001409 | Nonsignifi |
| 1417070  | 998348.4 | 1377773  | 788786.6 | 1105970  | 1.045709 | 0.823183 | 0.064482 | Nonsignifi |
| 1610205  | 976613.3 | 1260553  | 940626.4 | 1643472  | 0.898341 | 0.38015  | -0.15467 | Nonsignifi |
| 68615.65 | 111477.1 | 126126.3 | 330930.3 | 881654.5 | 1.517446 | 0.136178 | 0.601645 | Nonsignifi |
| 14872932 | 1423881  | 15656113 | 8506771  | 1212068  | 1.149584 | 0.674213 | 0.201112 | Nonsignifi |

|          |          |          |          |          |          |          |          |             |
|----------|----------|----------|----------|----------|----------|----------|----------|-------------|
| 1850797  | 413522.8 | 920868.4 | 552648.6 | 0        | 1.000973 | 0.996868 | 0.001404 | Nonsignifi  |
| 186199.6 | 148512.2 | 151791.4 | 171853.5 | 116607   | 0.898678 | 0.565097 | -0.15412 | Nonsignifi  |
| 83471.05 | 28894.86 | 43592.61 | 20392.76 | 23463.48 | 1.696316 | 0.286842 | 0.762405 | Nonsignifi  |
| 31169.62 | 32184.9  | 24871.39 | 35347.82 | 31245.41 | 0.993786 | 0.926561 | -0.00899 | Nonsignifi  |
| 115498.7 | 261579.1 | 159620.2 | 128857.6 | 119758.2 | 1.084599 | 0.710301 | 0.117161 | Nonsignifi  |
| 8289.797 | 21656.32 | 0        | 0        | 15875.54 | 0.382347 | 0.240159 | -1.38705 | Nonsignifi  |
| 27350.43 | 26195.36 | 84583.37 | 56610.57 | 41617.6  | 1.218479 | 0.607791 | 0.285081 | Nonsignifi  |
| 138584.1 | 92326.52 | 169285.6 | 147885.6 | 88732.26 | 0.65797  | 0.017991 | -0.60391 | Significant |
| 0        | 0        | 34121.02 | 0        | 0        | 1.637396 | 0.049162 | 0.711403 | Significant |
| 19871.48 | 22975.81 | 45504.48 | 29819.67 | 31914.6  | 0.673518 | 0.185961 | -0.57021 | Nonsignifi  |
| 989955.6 | 2374545  | 2157239  | 1690834  | 947214.4 | 1.292563 | 0.309783 | 0.370234 | Nonsignifi  |
| 13894890 | 10689256 | 13722111 | 7306066  | 11374047 | 0.546281 | 0.006354 | -0.87228 | Significant |
| 14348628 | 22490214 | 14898612 | 17206910 | 15760250 | 1.320286 | 0.071584 | 0.40085  | Nonsignifi  |
| 66989.49 | 113378.5 | 149422   | 98747.57 | 49848.69 | 1.607656 | 0.104455 | 0.684959 | Nonsignifi  |
| 0        | 31032.05 | 0        | 9329.803 | 28239.22 | 4.277069 | 0.005271 | 2.096622 | Significant |
| 4253089  | 4539292  | 7717616  | 3189135  | 6042786  | 1.234125 | 0.371349 | 0.303489 | Nonsignifi  |
| 1648122  | 1872400  | 2872860  | 15814381 | 1408889  | 2.06713  | 0.244886 | 1.047629 | Nonsignifi  |
| 90493.27 | 146433.9 | 1578439  | 84863.02 | 433839.7 | 0.811629 | 0.695458 | -0.30111 | Nonsignifi  |
| 215337.5 | 431707.7 | 324232.8 | 370721.3 | 1710305  | 0.604722 | 0.268715 | -0.72565 | Nonsignifi  |
| 11558.75 | 5797.125 | 8212.199 | 0        | 0        | 2.019995 | 0.319223 | 1.014351 | Nonsignifi  |
| 23112.25 | 23336.96 | 70303.81 | 22539.53 | 11015.74 | 0.574962 | 0.199518 | -0.79846 | Nonsignifi  |
| 159016.8 | 137799.2 | 133619.4 | 92050.48 | 74334.76 | 2.489306 | 0.023398 | 1.315743 | Significant |
| 2659040  | 2855737  | 1022871  | 208974.6 | 5068505  | 1.645931 | 0.080324 | 0.718904 | Nonsignifi  |
| 2657.391 | 0        | 0        | 20990.28 | 90299.76 | 0.717494 | 0.586998 | -0.47896 | Nonsignifi  |
| 55245.89 | 112654.6 | 37506.68 | 4872.91  | 0        | 1.002868 | 0.993054 | 0.004132 | Nonsignifi  |
| 526539.4 | 511669.1 | 635844.6 | 881748.1 | 764982.1 | 1.273145 | 0.086257 | 0.348397 | Nonsignifi  |
| 232789.6 | 237682.2 | 187165.7 | 308063.1 | 224488.7 | 0.992533 | 0.968291 | -0.01081 | Nonsignifi  |
| 466254.5 | 935285.1 | 1141416  | 631721.6 | 797251.1 | 1.530649 | 0.095207 | 0.614143 | Nonsignifi  |
| 180406.5 | 81402.13 | 228846.5 | 105565.8 | 192036.8 | 1.37087  | 0.43016  | 0.455092 | Nonsignifi  |
| 3486957  | 4999357  | 5077788  | 3814142  | 5249251  | 0.742729 | 0.136077 | -0.42909 | Nonsignifi  |
| 2810.845 | 1699.376 | 2554.603 | 1786.282 | 0        | 7.875301 | 0.375832 | 2.977335 | Nonsignifi  |
| 50816.3  | 42094.63 | 35405.22 | 37970.18 | 37168.36 | 0.864368 | 0.437877 | -0.21028 | Nonsignifi  |
| 25649.28 | 17626.83 | 10221.53 | 23193.38 | 18486.24 | 0.85012  | 0.370801 | -0.23426 | Nonsignifi  |
| 59523.56 | 23986.13 | 111040.8 | 56971.95 | 558344.4 | 0.519334 | 0.267264 | -0.94526 | Nonsignifi  |
| 271782.3 | 648051.8 | 496206.5 | 702234.1 | 510601   | 1.151567 | 0.609193 | 0.203599 | Nonsignifi  |
| 0        | 0        | 90828.85 | 105123.3 | 119034.7 | 0.989973 | 0.965561 | -0.01454 | Nonsignifi  |
| 0        | 38568.8  | 250637   | 69625.23 | 57255.23 | 8.790801 | 0.188866 | 3.135995 | Nonsignifi  |
| 0        | 0        | 18659.63 | 9843.757 | 8308.27  | 1.202551 | 0.674555 | 0.266098 | Nonsignifi  |
| 12810.79 | 9092.023 | 13408.54 | 9293.505 | 12403.54 | 0.803242 | 0.174483 | -0.31609 | Nonsignifi  |
| 1501955  | 1066826  | 300997.8 | 169012.5 | 309894   | 1.88536  | 0.14467  | 0.91484  | Nonsignifi  |
| 128400   | 154365.2 | 137893.8 | 41455.07 | 56415.71 | 1.213969 | 0.350161 | 0.279731 | Nonsignifi  |
| 616584.9 | 1002240  | 4889159  | 982214   | 464175.1 | 0.907606 | 0.842322 | -0.13986 | Nonsignifi  |
| 41130.95 | 47691.27 | 41742.54 | 30455.74 | 79142.35 | 0.98577  | 0.934816 | -0.02068 | Nonsignifi  |
| 94789.66 | 168082.5 | 1416955  | 211687.5 | 134130.7 | 0.990243 | 0.981447 | -0.01415 | Nonsignifi  |
| 2442683  | 4838205  | 2721652  | 2575866  | 3680530  | 0.831221 | 0.553031 | -0.2667  | Nonsignifi  |
| 28348.9  | 15477.87 | 16271.75 | 13011.18 | 19256.74 | 0.961351 | 0.691521 | -0.05686 | Nonsignifi  |
| 72691.86 | 31101.28 | 64223.98 | 61927.07 | 43573.52 | 0.84045  | 0.313803 | -0.25077 | Nonsignifi  |
| 18292.16 | 26567.4  | 13298.66 | 14986.54 | 14703.22 | 1.048456 | 0.814211 | 0.068266 | Nonsignifi  |
| 0        | 0        | 13015.62 | 15474.47 | 0        | 2.23898  | 0.337386 | 1.162842 | Nonsignifi  |
| 40475.86 | 57248.1  | 184825.5 | 54835.97 | 39255.7  | 0.981235 | 0.956932 | -0.02733 | Nonsignifi  |
| 7190.7   | 45718.02 | 2287.635 | 0        | 2654.995 | 0.525679 | 0.245414 | -0.92775 | Nonsignifi  |
| 877000.4 | 305881.3 | 2054722  | 1490924  | 2042480  | 0.7065   | 0.20798  | -0.50124 | Nonsignifi  |
| 87562.27 | 75995.98 | 80953.51 | 103556.4 | 87843.36 | 0.944651 | 0.311785 | -0.08215 | Nonsignifi  |
| 52509.25 | 43576.19 | 102911.5 | 68423.43 | 68956.77 | 0.753976 | 0.280209 | -0.40741 | Nonsignifi  |
| 4541216  | 2140980  | 3321786  | 3951810  | 6248128  | 0.652404 | 0.17886  | -0.61616 | Nonsignifi  |
| 15730.27 | 13024.75 | 31260.85 | 11043.44 | 14795.1  | 0.639276 | 0.02615  | -0.64549 | Significant |
| 1301631  | 1892796  | 742015.3 | 1545641  | 2583182  | 1.136768 | 0.618291 | 0.184938 | Nonsignifi  |
| 56991.41 | 119953.2 | 180450.4 | 27951.47 | 106667   | 1.036193 | 0.913493 | 0.051293 | Nonsignifi  |



|          |          |          |          |          |          |          |          |             |
|----------|----------|----------|----------|----------|----------|----------|----------|-------------|
| 19687.59 | 37677.45 | 22185.85 | 19517.58 | 0        | 1.322495 | 0.503093 | 0.403262 | Nonsignifi  |
| 21125224 | 20307770 | 25074290 | 22579542 | 18478050 | 1.509547 | 0.038384 | 0.594115 | Significant |
| 0        | 189353.8 | 0        | 0        | 0        | 0.199163 | 0.381562 | -2.32798 | Nonsignifi  |
| 17235.95 | 50604.96 | 169222   | 0        | 30740.23 | 0.705643 | 0.580751 | -0.50299 | Nonsignifi  |
| 103472.7 | 54687.82 | 186657.7 | 106769.6 | 144551.8 | 0.928708 | 0.659908 | -0.1067  | Nonsignifi  |
| 8537.129 | 15211.59 | 149548   | 9433.184 | 7276.493 | 0.262416 | 0.276406 | -1.93007 | Nonsignifi  |
| 16341.84 | 15313.45 | 0        | 16804.96 | 15007.56 | 1.241565 | 0.110507 | 0.31216  | Nonsignifi  |
| 77926.11 | 65554.03 | 47687.32 | 67950.6  | 53676.83 | 1.268149 | 0.043179 | 0.342724 | Nonsignifi  |
| 363696.5 | 373990.9 | 441419.4 | 339014.2 | 527525.1 | 1.146285 | 0.37919  | 0.196966 | Nonsignifi  |
| 0        | 33708.8  | 43389.63 | 0        | 19637.86 | 2.00943  | 0.066542 | 1.006786 | Nonsignifi  |
| 6017053  | 5986860  | 11519653 | 26747680 | 9310018  | 1.329527 | 0.316051 | 0.410913 | Nonsignifi  |
| 1987605  | 1263949  | 1580189  | 1990649  | 1463879  | 0.922873 | 0.253969 | -0.1158  | Nonsignifi  |
| 0        | 47711.68 | 59293.95 | 46664.43 | 52463.98 | 0.875412 | 0.415074 | -0.19197 | Nonsignifi  |
| 12057.77 | 51122.49 | 26903.31 | 22745.47 | 33019.29 | 2.688583 | 0.014292 | 1.426846 | Significant |
| 47451.12 | 40648.64 | 40040.56 | 47218.84 | 48267.13 | 0.949798 | 0.716477 | -0.07431 | Nonsignifi  |
| 0        | 121912.6 | 137383.3 | 156854.3 | 0        | 0.539432 | 0.112048 | -0.89049 | Nonsignifi  |
| 0        | 0        | 0        | 9837.37  | 0        | 0.714219 | 0.195912 | -0.48556 | Nonsignifi  |
| 133458.1 | 15703.73 | 183613.1 | 0        | 265576.6 | 0.881213 | 0.774508 | -0.18244 | Nonsignifi  |
| 61525.27 | 80436.81 | 75627.37 | 97722.45 | 59664.69 | 1.037045 | 0.71902  | 0.052478 | Nonsignifi  |
| 19488916 | 18464602 | 29336766 | 29398798 | 9970805  | 1.304607 | 0.175133 | 0.383615 | Nonsignifi  |
| 3373387  | 1721724  | 3262724  | 1073596  | 2491481  | 0.883641 | 0.495037 | -0.17847 | Nonsignifi  |
| 2233605  | 2794871  | 2392637  | 2921743  | 0        | 0.559786 | 0.155743 | -0.83705 | Nonsignifi  |
| 189530.4 | 188818.6 | 206718.5 | 261071.2 | 204170.4 | 0.954111 | 0.559151 | -0.06777 | Nonsignifi  |
| 279093.6 | 248547.7 | 217690.4 | 240106.8 | 218554.2 | 0.845162 | 0.084974 | -0.2427  | Nonsignifi  |
| 47691.73 | 43489.43 | 34699.5  | 61088.31 | 50664.67 | 1.253208 | 0.160843 | 0.325626 | Nonsignifi  |
| 0        | 0        | 0        | 0        | 0        | 2.227833 | 0.060552 | 1.155641 | Nonsignifi  |
| 31050.62 | 49170.09 | 125001   | 13207.11 | 35193.84 | 1.721086 | 0.122242 | 0.783319 | Nonsignifi  |
| 0        | 169884.5 | 316004.3 | 77912.16 | 229522.3 | 1.24587  | 0.448594 | 0.317153 | Nonsignifi  |
| 200308.5 | 382155.8 | 120285.9 | 172152.5 | 432611.3 | 1.148853 | 0.661717 | 0.200195 | Nonsignifi  |
| 104124.2 | 143738.1 | 170096.5 | 160973.3 | 118531   | 1.097623 | 0.694709 | 0.134382 | Nonsignifi  |
| 787881.9 | 731916.6 | 1302121  | 1412442  | 996358.8 | 0.876753 | 0.385633 | -0.18976 | Nonsignifi  |
| 1411931  | 1089364  | 1326885  | 1207311  | 1103741  | 0.828401 | 0.037439 | -0.2716  | Nonsignifi  |
| 3158710  | 6635904  | 5332054  | 2995069  | 4608178  | 0.917794 | 0.553031 | -0.12376 | Nonsignifi  |
| 441810.5 | 531121.9 | 148890.3 | 723604.6 | 377686.7 | 3.390405 | 0.010379 | 1.761458 | Significant |
| 586528.3 | 907179.1 | 1208320  | 469491.3 | 809889.6 | 1.554287 | 0.000385 | 0.636253 | Significant |
| 491914.7 | 388588.3 | 695399.1 | 1093380  | 679486.2 | 1.039813 | 0.882394 | 0.056324 | Nonsignifi  |
| 2492538  | 2407665  | 4576453  | 1618237  | 2041228  | 0.811849 | 0.203544 | -0.30072 | Nonsignifi  |
| 50223.34 | 91502.85 | 121067.6 | 0        | 68225.88 | 1.14478  | 0.538533 | 0.19507  | Nonsignifi  |
| 0        | 0        | 0        | 0        | 0        | 2.359466 | 0.386988 | 1.238461 | Nonsignifi  |
| 66757.23 | 106799.9 | 221510.2 | 189897.1 | 266572.9 | 1.35018  | 0.273981 | 0.433152 | Nonsignifi  |
| 0        | 0        | 0        | 21912.05 | 17111.6  | 1.898745 | 0.316153 | 0.925046 | Nonsignifi  |
| 0        | 325145   | 0        | 410344   | 460631.2 | 0.989983 | 0.971012 | -0.01452 | Nonsignifi  |
| 0        | 0        | 0        | 0        | 0        | 0.69323  | 0.373179 | -0.52859 | Nonsignifi  |
| 1767338  | 385659.9 | 1410311  | 332522.7 | 1085073  | 1.081518 | 0.757605 | 0.113058 | Nonsignifi  |
| 38738.36 | 36086.57 | 31338.21 | 46644.46 | 50254.5  | 0.758665 | 0.24253  | -0.39846 | Nonsignifi  |
| 132874.2 | 129641.6 | 126411.1 | 167916.2 | 205551.4 | 0.848585 | 0.273867 | -0.23687 | Nonsignifi  |
| 686132.5 | 2002705  | 1221543  | 1518769  | 2134869  | 1.01815  | 0.904321 | 0.02595  | Nonsignifi  |
| 56512.44 | 130649.4 | 117007.4 | 79773.78 | 49008.88 | 1.200832 | 0.360221 | 0.264034 | Nonsignifi  |
| 197237.5 | 174366.6 | 230793.3 | 391410.2 | 841108.9 | 0.959303 | 0.87899  | -0.05994 | Nonsignifi  |
| 168578   | 299141.6 | 254238.8 | 207214.7 | 232987.4 | 1.022314 | 0.872016 | 0.031839 | Nonsignifi  |
| 5625.229 | 25478.74 | 628144.9 | 33077.55 | 34758.11 | 0.85331  | 0.847362 | -0.22886 | Nonsignifi  |
| 44159.97 | 1121150  | 3464148  | 2691828  | 177269   | 1.670542 | 0.467318 | 0.740316 | Nonsignifi  |
| 168492.4 | 13266145 | 12829909 | 10289093 | 1708721  | 2.014749 | 0.068224 | 1.0106   | Nonsignifi  |
| 888413.5 | 1656174  | 1234560  | 1040700  | 1799172  | 2.185729 | 0.007874 | 1.128115 | Significant |
| 2698828  | 4381364  | 3928796  | 2609462  | 1606722  | 0.991135 | 0.959666 | -0.01285 | Nonsignifi  |
| 6001179  | 5650759  | 2958631  | 2643894  | 3753301  | 0.79456  | 0.096657 | -0.33177 | Nonsignifi  |
| 7935.89  | 49639.58 | 0        | 18616.55 | 17936.11 | 1.237695 | 0.573786 | 0.307656 | Nonsignifi  |
| 0        | 27207.93 | 0        | 0        | 96775.17 | 1.827899 | 0.18609  | 0.870187 | Nonsignifi  |

|          |          |          |          |          |          |          |          |            |
|----------|----------|----------|----------|----------|----------|----------|----------|------------|
| 7726614  | 9350738  | 6867997  | 6600477  | 7210026  | 1.130118 | 0.470589 | 0.176474 | Nonsignifi |
| 48813.61 | 47357.62 | 63595.5  | 114455.9 | 48330.43 | 0.882611 | 0.579019 | -0.18015 | Nonsignifi |
| 116936.8 | 0        | 29615.99 | 345897.7 | 41758.72 | 0.750928 | 0.630404 | -0.41325 | Nonsignifi |
| 4.29E+08 | 5.13E+08 | 4.29E+08 | 3.1E+08  | 4.2E+08  | 1.014143 | 0.926362 | 0.02026  | Nonsignifi |
| 16115911 | 13724146 | 13064206 | 14948806 | 11444969 | 0.869613 | 0.20502  | -0.20155 | Nonsignifi |
| 7886.984 | 28982.11 | 0        | 0        | 26535.91 | 0.977734 | 0.9383   | -0.03249 | Nonsignifi |

| S.vs.C | UP.I | GO_NUM | GO_Descri  | KEGG_Des      | KEGG_EC   | KEGG_ko | COG_Func    | COG_Func      | COG_Class    |
|--------|------|--------|------------|---------------|-----------|---------|-------------|---------------|--------------|
| None   |      | 1      | Molecular  | fast skelet   | --        | ko04510 | F           | --            | --           |
| None   |      | 2      | Biological | vinculin      | --        | ko04510 | F           | --            | --           |
| None   |      | 1      | Biological | saposin       | --        | ko04142 | L           | --            | --           |
| None   |      | 1      | Molecular  | histone H2    | --        | ko05034 | A           | --            | --           |
| None   |      | 1      | Molecular  | histone H2    | --        | ko04217 | N           | --            | --           |
| None   |      | 1      | Molecular  | compleme      | --        | ko04610 | C           | --            | --           |
| None   |      | 2      | Cellular   | Cc apolipoprc | --        | ko04979 | C           | --            | --           |
| None   |      | 1      | Molecular  | ADP-ribos     | --        | ko04144 | E           | GTPase SAR    | General fu   |
| None   |      | 2      | Molecular  | fructose-b    | 4.1.2.13  | ko00010 | G           | Fructose-t G  | Carbohydr    |
| None   |      | 4      | Cellular   | Cc apolipoprc | --        | --      | --          | --            | --           |
| None   |      | 3      | Molecular  | myosin he     | --        | ko04530 | T           | Chromoso D    | Cell cycle c |
| None   |      | 3      | Biological | --            | --        | --      | --          | --            | --           |
| None   |      | 1      | Molecular  | junction pl   | --        | ko05200 | P           | --            | --           |
| None   | --   | --     | --         | C-type lec    | --        | --      | Uncharact   | R             | General fu   |
| up     |      | 4      | Molecular  | cathepsin l   | 3.4.22.1  | ko04140 | A           | Cysteine p O  | Posttransla  |
| None   |      | 4      | Cellular   | Cc apolipoprc | --        | ko03320 | P           | --            | --           |
| None   | --   | --     | --         | melanoma      | --        | --      | --          | --            | --           |
| None   |      | 3      | Molecular  | amyloid-lil   | --        | --      | --          | --            | --           |
| down   |      | 3      | Biological | --            | --        | --      | --          | --            | --           |
| None   | --   | --     | --         | --            | --        | --      | --          | --            | --           |
| None   | --   | --     | --         | enolase       | 4.2.1.11  | ko00010 | G           | Enolase G     | Carbohydr    |
| None   |      | 1      | Biological | alpha 1,3-g   | 3.2.1.84  | ko00510 | N           | Alpha-glu     | Carbohydr    |
| None   |      | 1      | Molecular  | cortactin     | --        | ko04530 | T           | --            | --           |
| None   |      | 2      | Molecular  | annexin A2    | --        | --      | --          | --            | --           |
| None   |      | 1      | Molecular  | actinin alp   | --        | ko04510 | F           | --            | --           |
| None   |      | 1      | Molecular  | fibulin 5     | --        | --      | --          | --            | --           |
| None   | --   | --     | --         | serpin pep    | --        | --      | Serine pro  | O             | Posttransla  |
| None   | --   | --     | --         | alpha-1-ai    | --        | ko04610 | C           | Serine pro    | O            |
| None   | --   | --     | --         | serpin pep    | --        | --      | Serine pro  | O             | Posttransla  |
| None   | --   | --     | --         | protein C i   | --        | ko04610 | C           | Serine pro    | O            |
| None   | --   | --     | --         | serpin pep    | --        | --      | Serine pro  | O             | Posttransla  |
| None   |      | 4      | Molecular  | matrix met    | 3.4.24.24 | ko01522 | E           | Predicted     | O            |
| None   | --   | --     | --         | --            | --        | --      | --          | --            | --           |
| None   | --   | --     | --         | intercellul   | --        | ko04514 | C           | --            | --           |
| None   |      | 2      | Molecular  | Ras-relate    | --        | ko04972 | P           | GTPase SAR    | General fu   |
| None   |      | 1      | Molecular  | tenascin      | --        | ko04151 | P           | Phage-rel     | X            |
| None   |      | 3      | Molecular  | --            | --        | --      | --          | --            | --           |
| None   | --   | --     | --         | prostaglan    | 5.3.99.2  | ko00590 | A           | Bacterial liq | M            |
| None   |      | 1      | Biological | protein dis   | 5.3.4.1   | ko04141 | P           | Negative r    | O            |
| None   |      | 1      | Cellular   | Cc transmeml  | --        | --      | --          | --            | --           |
| None   |      | 3      | Molecular  | --            | --        | --      | Leucine-ric | K             | Transcripti  |
| None   | --   | --     | --         | antithromk    | --        | ko04610 | C           | Serine pro    | O            |
| None   | --   | --     | --         | carboxype     | 3.4.17.-  | --      | Zn-depend   | O             | Posttransla  |
| None   | --   | --     | --         | collectin su  | --        | --      | Membran     | M             | Cell wall/m  |
| None   | --   | --     | --         | intron-bin    | --        | ko03040 | S           | Superfamil    | L            |
| None   | --   | --     | --         | compleme      | --        | ko04610 | C           | Type V sec    | MU           |
| None   |      | 1      | Molecular  | heparan su    | --        | ko04512 | E           | Outer men     | M            |
| None   | --   | --     | --         | compleme      | --        | ko04610 | C           | Exopolysac    | G            |
| None   | --   | --     | --         | compleme      | --        | ko04610 | C           | Type V sec    | MU           |
| None   | --   | --     | --         | matrix Gla    | --        | --      | --          | --            | --           |
| None   |      | 2      | Molecular  | Ras-relate    | --        | ko04010 | N           | GTPase SAR    | General fu   |
| None   |      | 2      | Molecular  | aminopept     | 3.4.11.2  | ko00480 | G           | Amino pep     | E            |
| None   |      | 2      | Molecular  | Ras GTPas     | --        | ko04520 | A           | --            | --           |
| None   |      | 4      | Molecular  | G protein-    | --        | --      | --          | --            | --           |
| None   |      | 2      | Molecular  | platelet-ac   | 3.1.1.47  | ko00565 | E           | Predicted     | R            |
| None   |      | 1      | Molecular  | --            | --        | --      | --          | --            | --           |
| up     |      | 4      | Molecular  | --            | --        | --      | --          | --            | --           |

|      |    |               |                      |    |           |                |              |
|------|----|---------------|----------------------|----|-----------|----------------|--------------|
| None | -- | --            | --                   | -- | --        | Uncaracter R   | General fu   |
| None |    | 2 Molecular   | plastin-2            | -- | --        | --             | --           |
| up   |    | 1 Cellular Cc | lysosomal-           | -- | ko04140 A | --             | --           |
| None | -- | --            | major histc          | -- | ko04144 E | --             | --           |
| None | -- | --            | immunoglu            | -- | ko04020 C | --             | --           |
| None | -- | --            | --                   | -- | --        | --             | --           |
| None | -- | --            | --                   | -- | --        | --             | --           |
| None | -- | --            | --                   | -- | --        | --             | --           |
| None | -- | --            | immunoglu            | -- | ko04020 C | --             | --           |
| None | -- | --            | --                   | -- | --        | --             | --           |
| down | -- | --            | --                   | -- | --        | --             | --           |
| None | -- | --            | --                   | -- | --        | --             | --           |
| None | -- | --            | immunoglu            | -- | ko04020 C | --             | --           |
| None | -- | --            | immunoglu            | -- | ko04020 C | --             | --           |
| None | -- | --            | immunoglu            | -- | ko04020 C | --             | --           |
| None | -- | --            | --                   | -- | --        | --             | --           |
| None | -- | --            | pre-B lymf           | -- | --        | --             | --           |
| None | -- | --            | pre-B lymf           | -- | --        | --             | --           |
| None | -- | --            | pre-B lymf           | -- | --        | --             | --           |
| None | -- | --            | --                   | -- | --        | --             | --           |
| down | -- | --            | pre-B lymf           | -- | --        | --             | --           |
| None | -- | --            | pre-B lymf           | -- | --        | --             | --           |
| None | -- | --            | --                   | -- | --        | --             | --           |
| None | -- | --            | immunoglu            | -- | ko04020 C | --             | --           |
| None | -- | --            | --                   | -- | --        | --             | --           |
| None | -- | --            | --                   | -- | --        | --             | --           |
| None | -- | --            | --                   | -- | --        | --             | --           |
| None | -- | --            | --                   | -- | --        | --             | --           |
| None | -- | 2 Molecular   | --                   | -- | --        | --             | --           |
| None | -- | --            | --                   | -- | --        | --             | --           |
| None | -- | --            | --                   | -- | --        | --             | --           |
| None | -- | --            | --                   | -- | --        | --             | --           |
| None | -- | --            | --                   | -- | --        | --             | --           |
| None | -- | 4 Molecular   | carboxype 3.4.17.20  | -- | ko04610 C | Murein triç M  | Cell wall/m  |
| None | -- | --            | --                   | -- | --        | --             | --           |
| None | -- | --            | --                   | -- | --        | --             | --           |
| None |    | 3 Molecular   | receptor-t 3.1.3.48  | -- | ko04520 A | Protein tyr T  | Signal tran  |
| None | -- | --            | neuroblast           | -- | ko04350 T | --             | --           |
| None |    | 3 Molecular   | cadherin 1           | -- | ko04015 R | Large exoç U   | Intracellula |
| None |    | 1 Molecular   | neural cell          | -- | ko04514 C | Uncharactç S   | Function u   |
| None |    | 1 Cellular Cc | serum albu           | -- | ko04918 T | --             | --           |
| None |    | 3 Molecular   | mannosyl- 3.2.1.113  | -- | ko00510 N | --             | --           |
| None |    | 1 Molecular   | L1 cell adh          | -- | --        | Uncharactç S   | Function u   |
| None | -- | --            | --                   | -- | --        | --             | --           |
| None | -- | --            | cell adhesi          | -- | ko04514 C | --             | --           |
| None |    | 3 Molecular   | glutathionç 1.11.1.9 | -- | ko00480 G | Glutathion VI  | Defense m    |
| None |    | 2 Molecular   | aggrecaç             | -- | --        | Spore coat M   | Cell wall/m  |
| None | -- | --            | retinoic ac          | -- | --        | --             | --           |
| None |    | 1 Molecular   | coagulatio           | -- | ko04610 C | Multicoppç DPM | Cell cycle c |
| None | -- | --            | --                   | -- | --        | --             | --           |
| None | -- | --            | --                   | -- | --        | --             | --           |
| None | -- | --            | --                   | -- | --        | --             | --           |
| None |    | 2 Molecular   | translation          | -- | ko03013 R | --             | --           |
| None | -- | --            | poliovirus           | -- | ko04514 C | --             | --           |
| None |    | 2 Molecular   | CUB and s            | -- | --        | Periplasmiç U  | Intracellula |
| None |    | 3 Molecular   | peroxidc 1.11.1.15   | -- | ko04146 P | Alkyl hydrç V  | Defense m    |

|      |    |               |                      |    |           |                |    |              |
|------|----|---------------|----------------------|----|-----------|----------------|----|--------------|
| None | -- | --            | --                   | -- | --        | --             | -- | --           |
| None | -- | --            | --                   | -- | --        | --             | -- | --           |
| None | -- | --            | immunogl             | -- | ko04020 C | --             | -- | --           |
| None | -- | --            | immunogl             | -- | ko04020 C | --             | -- | --           |
| None | -- | --            | --                   | -- | --        | --             | -- | --           |
| None | -- | --            | --                   | -- | --        | --             | -- | --           |
| None | -- | --            | --                   | -- | --        | --             | -- | --           |
| None | -- | --            | pre-B lymph          | -- | --        | --             | -- | --           |
| None | -- | --            | immunogl             | -- | ko04020 C | --             | -- | --           |
| None | -- | --            | --                   | -- | --        | --             | -- | --           |
| None | -- | --            | --                   | -- | --        | --             | -- | --           |
| None | -- | --            | --                   | -- | --        | --             | -- | --           |
| None | -- | 4 Cellular Cc | apolipoprc           | -- | ko03320 P | --             | -- | --           |
| None | -- | 1 Molecular   | --                   | -- | --        | PKD repea S    | -- | Function u   |
| None | -- | 1 Molecular   | platelet gly         | -- | ko04512 E | Leucine-ric K  | -- | Transcripti  |
| None | -- | --            | --                   | -- | --        | --             | -- | --           |
| None | -- | --            | --                   | -- | --        | --             | -- | --           |
| None | -- | --            | --                   | -- | --        | --             | -- | --           |
| None | -- | --            | --                   | -- | --        | --             | -- | --           |
| None | -- | --            | --                   | -- | --        | --             | -- | --           |
| None | -- | --            | immunogl             | -- | ko04020 C | --             | -- | --           |
| None | -- | --            | --                   | -- | --        | --             | -- | --           |
| None | -- | --            | immunogl             | -- | ko04020 C | --             | -- | --           |
| None | -- | --            | --                   | -- | --        | --             | -- | --           |
| None | -- | 1 Molecular   | lymphocyt            | -- | ko04015 R | --             | -- | --           |
| None | -- | 2 Molecular   | plasminog 3.4.21.7   | -- | ko04080 N | Secreted t1 O  | -- | Posttransla  |
| None | -- | --            | --                   | -- | --        | --             | -- | --           |
| None | -- | --            | immunogl             | -- | ko04020 C | --             | -- | --           |
| None | -- | --            | --                   | -- | --        | --             | -- | --           |
| None | -- | --            | immunogl             | -- | ko04020 C | --             | -- | --           |
| None | -- | --            | --                   | -- | --        | --             | -- | --           |
| None | -- | --            | --                   | -- | --        | --             | -- | --           |
| None | -- | 1 Molecular   | --                   | -- | --        | --             | -- | --           |
| None | -- | --            | --                   | -- | --        | --             | -- | --           |
| None | -- | --            | selectin, ly         | -- | ko04514 C | Ca2+ -binc Q   | -- | Secondary    |
| None | -- | --            | --                   | -- | --        | --             | -- | --           |
| None | -- | --            | --                   | -- | --        | --             | -- | --           |
| None | -- | --            | --                   | -- | --        | --             | -- | --           |
| None | -- | --            | --                   | -- | --        | --             | -- | --           |
| None | -- | --            | tropomyos            | -- | ko04260 C | Cell divisio D | -- | Cell cycle c |
| None | -- | 1 Molecular   | cystatin-C           | -- | ko04970 S | --             | -- | --           |
| None | -- | 2 Molecular   | hemoglob             | -- | ko05143 A | Hemoglob C     | -- | Energy prc   |
| None | -- | --            | immunogl             | -- | ko04020 C | --             | -- | --           |
| None | -- | 4 Molecular   | coagulatio 3.4.21.38 | -- | ko04610 C | Secreted t1 O  | -- | Posttransla  |
| None | -- | 4 Cellular Cc | apolipoprc           | -- | ko04979 C | --             | -- | --           |
| None | -- | 1 Molecular   | cholesteryl          | -- | ko04979 C | --             | -- | --           |
| None | -- | 2 Molecular   | galectin-3           | -- | --        | --             | -- | --           |
| None | -- | 2 Molecular   | type II ker          | -- | --        | DNA repai L    | -- | Replicatio   |
| None | -- | 1 Molecular   | EGF-conta            | -- | --        | --             | -- | --           |
| None | -- | --            | compleme             | -- | ko05168 H | --             | -- | --           |
| None | -- | 3 Molecular   | protein S            | -- | ko04610 C | --             | -- | --           |
| None | -- | --            | transformii          | -- | --        | Uncaracter R   | -- | General fu   |
| None | -- | --            | CLIP-assoc           | -- | --        | --             | -- | --           |
| None | -- | --            | protein C r          | -- | ko04610 C | --             | -- | --           |
| None | -- | --            | haptoglob            | -- | --        | --             | -- | --           |
| None | -- | --            | --                   | -- | --        | --             | -- | --           |

|      |    |               |             |            |           |             |    |             |
|------|----|---------------|-------------|------------|-----------|-------------|----|-------------|
| None | -- | --            | --          | --         | --        | --          | -- | --          |
| None | -- | --            | --          | --         | --        | --          | -- | --          |
| None | -- | --            | --          | --         | --        | --          | -- | --          |
| None | -- | --            | immunogl    | --         | ko04020 C | --          | -- | --          |
| None | -- | --            | --          | --         | --        | --          | -- | --          |
| None | -- | --            | --          | --         | --        | --          | -- | --          |
| None | -- | --            | immunogl    | --         | ko04020 C | --          | -- | --          |
| None | -- | --            | --          | --         | --        | --          | -- | --          |
| None | -- | --            | --          | --         | --        | --          | -- | --          |
| None | -- | --            | --          | --         | --        | --          | -- | --          |
| None | -- | --            | --          | --         | --        | --          | -- | --          |
| None | -- | --            | immunogl    | --         | ko04020 C | --          | -- | --          |
| None | -- | --            | --          | --         | --        | --          | -- | --          |
| None | -- | --            | --          | --         | --        | --          | -- | --          |
| up   | -- | --            | --          | --         | --        | --          | -- | --          |
| None | -- | --            | --          | --         | --        | --          | -- | --          |
| None | -- | --            | --          | --         | --        | --          | -- | --          |
| None | -- | --            | --          | --         | --        | --          | -- | --          |
| None | -- | --            | --          | --         | --        | --          | -- | --          |
| None | -- | --            | --          | --         | --        | --          | -- | --          |
| None | -- | --            | immunogl    | --         | ko04020 C | --          | -- | --          |
| None | -- | --            | --          | --         | --        | --          | -- | --          |
| None | -- | --            | --          | --         | --        | --          | -- | --          |
| None | -- | --            | --          | --         | --        | --          | -- | --          |
| None | -- | --            | immunogl    | --         | ko04020 C | --          | -- | --          |
| up   | -- | --            | --          | --         | --        | --          | -- | --          |
| None | -- | --            | --          | --         | --        | --          | -- | --          |
| None | -- | --            | --          | --         | --        | --          | -- | --          |
| up   | -- | --            | --          | --         | --        | --          | -- | --          |
| None | -- | --            | --          | --         | --        | --          | -- | --          |
| None | -- | --            | --          | --         | --        | --          | -- | --          |
| None | -- | --            | --          | --         | --        | --          | -- | --          |
| None | -- | --            | --          | --         | --        | --          | -- | --          |
| None | -- | --            | --          | --         | --        | --          | -- | --          |
| None | -- | --            | immunogl    | --         | ko04020 C | --          | -- | --          |
| None | -- | --            | --          | --         | --        | --          | -- | --          |
| None |    | 1 Molecular   | tenascin    | --         | ko04151 P | Phage-rel   | X  | Mobilome:   |
| None |    | 2 Cellular Cc | --          | --         | --        | --          | -- | --          |
| None |    | 3 Molecular   | hepsin      | 3.4.21.106 | ko05203 V | Secreted tr | O  | Posttransla |
| None |    | 2 Molecular   | Xaa-Pro di  | 3.4.13.9   | --        | Xaa-Pro ar  | E  | Amino acid  |
| None |    | 3 Biological  | superoxide  | 1.15.1.1   | --        | Cu/Zn sup   | P  | Inorganic i |
| None | -- | --            | --          | --         | --        | --          | -- | --          |
| None |    | 2 Biological  | lecithin-ch | 2.3.1.43   | ko00564 G | --          | -- | --          |
| None | -- | --            | staphylocc  | --         | ko05169 E | Endonucle   | L  | Replicatio  |
| None |    | 3 Molecular   | thiol oxida | 1.8.3.2    | --        | --          | -- | --          |
| None | -- | --            | pigment e   | --         | ko04310 V | Serine pro  | O  | Posttransla |
| None |    | 1 Molecular   | --          | --         | --        | Leucine-ri  | K  | Transcripti |
| None | -- | --            | lactotransf | 3.4.21.-   | --        | --          | -- | --          |
| None | -- | --            | --          | --         | --        | --          | -- | --          |
| None | -- | --            | --          | --         | --        | --          | -- | --          |
| None | -- | --            | --          | --         | --        | --          | -- | --          |
| None | -- | --            | --          | --         | --        | --          | -- | --          |
| None | -- | --            | --          | --         | --        | --          | -- | --          |
| None | -- | --            | --          | --         | --        | --          | -- | --          |
| None | -- | --            | --          | --         | --        | --          | -- | --          |
| None |    | 2 Molecular   | cathepsin l | 3.4.23.5   | ko04071 S | --          | -- | --          |

|      |    |               |              |           |           |               |              |
|------|----|---------------|--------------|-----------|-----------|---------------|--------------|
| None | -- | --            | vitamin D    | --        | --        | --            | --           |
| None | -- | --            | --           | --        | --        | --            | --           |
| None | -- | --            | --           | --        | --        | --            | --           |
| None | -- | --            | --           | --        | --        | --            | --           |
| None | -- | --            | --           | --        | --        | --            | --           |
| None | -- | --            | --           | --        | --        | --            | --           |
| None | -- | 2 Molecular   | hemoglob     | --        | ko05143 A | --            | --           |
| None | -- | --            | immunogl     | --        | ko04020 C | --            | --           |
| None | -- | --            | --           | --        | --        | --            | --           |
| None | -- | --            | immunogl     | --        | ko04020 C | --            | --           |
| None | -- | --            | --           | --        | --        | --            | --           |
| None | -- | --            | --           | --        | --        | --            | --           |
| None | -- | --            | --           | --        | --        | --            | --           |
| down | -- | --            | pre-B lymf   | --        | --        | --            | --           |
| None | -- | --            | --           | --        | --        | --            | --           |
| None | -- | --            | --           | --        | --        | --            | --           |
| None | -- | 5 Cellular Cc | talins       | --        | ko04015 R | --            | --           |
| None | -- | 1 Molecular   | --           | --        | --        | --            | --           |
| None | -- | 2 Molecular   | receptor-t   | 3.1.3.48  | --        | Protein tyr T | Signal tran  |
| None | -- | 2 Molecular   | macrophag    | --        | ko04145 P | Autotransp    | Intracellul  |
| down | -- | 2 Molecular   | insulin-like | --        | ko01521 E | --            | --           |
| None | -- | 2 Molecular   | compleme     | 3.4.21.43 | ko04610 C | Secreted t    | Posttransla  |
| None | -- | 1 Molecular   | low affinity | --        | ko04145 P | --            | --           |
| None | -- | --            | immunogl     | --        | ko04020 C | --            | --           |
| None | -- | --            | --           | --        | --        | --            | --           |
| None | -- | --            | --           | --        | --        | --            | --           |
| None | -- | --            | immunogl     | --        | ko04020 C | --            | --           |
| None | -- | --            | immunogl     | --        | ko04020 C | --            | --           |
| None | -- | --            | immunogl     | --        | ko04020 C | --            | --           |
| up   | -- | --            | immunogl     | --        | ko04020 C | --            | --           |
| None | -- | --            | --           | --        | --        | --            | --           |
| None | -- | --            | immunogl     | --        | ko04020 C | --            | --           |
| None | -- | --            | immunogl     | --        | ko04020 C | --            | --           |
| None | -- | --            | --           | --        | --        | --            | --           |
| None | -- | --            | --           | --        | --        | --            | --           |
| None | -- | --            | --           | --        | --        | --            | --           |
| None | -- | --            | --           | --        | --        | --            | --           |
| None | -- | --            | --           | --        | --        | --            | --           |
| None | -- | --            | --           | --        | --        | --            | --           |
| None | -- | --            | --           | --        | --        | --            | --           |
| None | -- | --            | --           | --        | --        | --            | --           |
| None | -- | 2 Molecular   | CD44 anti    | --        | ko04512 E | --            | --           |
| None | -- | 2 Biological  | major hist   | --        | ko04144 E | --            | --           |
| None | -- | 4 Molecular   | small subu   | --        | ko03010 R | Ubiquitin O   | Posttransla  |
| up   | -- | --            | --           | --        | --        | --            | --           |
| None | -- | --            | --           | --        | --        | --            | --           |
| None | -- | 2 Cellular Cc | --           | --        | --        | --            | --           |
| None | -- | --            | tropomyos    | --        | ko04260 C | Chromoso D    | Cell cycle c |
| None | -- | 3 Cellular Cc | erythrocyt   | --        | --        | --            | --           |
| None | -- | 3 Cellular Cc | radixin      | --        | ko04530 T | --            | --           |
| None | -- | --            | tropomyos    | --        | ko04260 C | Chromoso D    | Cell cycle c |
| None | -- | 2 Molecular   | hemoglob     | --        | --        | --            | --           |
| None | -- | --            | --           | --        | --        | --            | --           |
| None | -- | --            | CD59 anti    | --        | ko04610 C | --            | --           |
| None | -- | --            | --           | --        | --        | --            | --           |
| None | -- | --            | immunogl     | --        | ko04020 C | --            | --           |
| None | -- | --            | immunogl     | --        | ko04020 C | --            | --           |
| None | -- | --            | immunogl     | --        | ko04020 C | --            | --           |
| None | -- | --            | --           | --        | --        | --            | --           |

|      |    |    |          |    |             |    |           |
|------|----|----|----------|----|-------------|----|-----------|
| None | -- | -- | --       | -- | --          | -- | --        |
| None | -- | -- | immunogl | -- | ko04020 C   | -- | --        |
| None | -- | -- | immunogl | -- | ko04020 C   | -- | --        |
| None | -- | -- | --       | -- | --          | -- | --        |
| None | -- | -- | --       | -- | --          | -- | --        |
| None | -- | -- | immunogl | -- | ko04020 C   | -- | --        |
| up   | -- | -- | --       | -- | --          | -- | --        |
| None | -- | -- | immunogl | -- | ko04020 C   | -- | --        |
| None | -- | -- | --       | -- | --          | -- | --        |
| None | -- | -- | --       | -- | --          | -- | --        |
| None | -- | -- | --       | -- | --          | -- | --        |
| None | -- | -- | immunogl | -- | ko04020 C   | -- | --        |
| None | -- | -- | immunogl | -- | ko04020 C   | -- | --        |
| None | -- | -- | immunogl | -- | ko04020 C   | -- | --        |
| up   | -- | -- | immunogl | -- | ko04020 C   | -- | --        |
| None | -- | -- | immunogl | -- | ko04020 C   | -- | --        |
| None | -- | -- | immunogl | -- | ko04020 C   | -- | --        |
| None | -- | -- | --       | -- | --          | -- | --        |
| None | -- | -- | immunogl | -- | ko04020 C   | -- | --        |
| None | -- | -- | --       | -- | --          | -- | --        |
| None | -- | -- | --       | -- | Glycogen (G | -- | Carbohydr |
| None | -- | -- | --       | -- | --          | -- | --        |
| None | -- | -- | immunogl | -- | ko04020 C   | -- | --        |
| None | -- | -- | --       | -- | --          | -- | --        |
| None | -- | -- | --       | -- | --          | -- | --        |
| None | -- | -- | --       | -- | --          | -- | --        |
| None | -- | -- | --       | -- | --          | -- | --        |
| None | -- | -- | immunogl | -- | ko04020 C   | -- | --        |
| up   | -- | -- | --       | -- | --          | -- | --        |
| None | -- | -- | --       | -- | --          | -- | --        |
| up   | -- | -- | --       | -- | --          | -- | --        |
| None | -- | -- | --       | -- | --          | -- | --        |
| None | -- | -- | --       | -- | --          | -- | --        |
| None | -- | -- | --       | -- | --          | -- | --        |
| up   | -- | -- | --       | -- | --          | -- | --        |
| None | -- | -- | --       | -- | --          | -- | --        |
| None | -- | -- | immunogl | -- | ko04020 C   | -- | --        |
| None | -- | -- | immunogl | -- | ko04020 C   | -- | --        |
| None | -- | -- | immunogl | -- | ko04020 C   | -- | --        |
| None | -- | -- | immunogl | -- | ko04020 C   | -- | --        |
| None | -- | -- | --       | -- | --          | -- | --        |
| None | -- | -- | --       | -- | --          | -- | --        |
| None | -- | -- | --       | -- | --          | -- | --        |
| None | -- | -- | --       | -- | --          | -- | --        |
| None | -- | -- | immunogl | -- | ko04020 C   | -- | --        |
| None | -- | -- | --       | -- | --          | -- | --        |
| None | -- | -- | --       | -- | --          | -- | --        |
| None | -- | -- | immunogl | -- | ko04020 C   | -- | --        |
| None | -- | -- | immunogl | -- | ko04020 C   | -- | --        |
| None | -- | -- | --       | -- | --          | -- | --        |
| None | -- | -- | --       | -- | --          | -- | --        |
| None | -- | -- | --       | -- | --          | -- | --        |
| None | -- | -- | immunogl | -- | ko04020 C   | -- | --        |
| None | -- | -- | --       | -- | --          | -- | --        |
| None | -- | -- | --       | -- | --          | -- | --        |



|      |    |              |              |    |           |              |    |             |
|------|----|--------------|--------------|----|-----------|--------------|----|-------------|
| up   | -- | --           | --           | -- | --        | --           | -- | --          |
| None | -- | --           | --           | -- | --        | --           | -- | --          |
| None | -- | --           | --           | -- | --        | --           | -- | --          |
| None | -- | --           | --           | -- | --        | --           | -- | --          |
| down | -- | --           | --           | -- | --        | --           | -- | --          |
| None | -- | --           | --           | -- | --        | --           | -- | --          |
| None | -- | --           | immunogl     | -- | ko04020 C | --           | -- | --          |
| None | -- | --           | immunogl     | -- | ko04020 C | --           | -- | --          |
| None | -- | --           | --           | -- | --        | --           | -- | --          |
| None | -- | --           | immunogl     | -- | ko04020 C | --           | -- | --          |
| None | -- | --           | --           | -- | --        | --           | -- | --          |
| None | -- | --           | --           | -- | --        | --           | -- | --          |
| None | -- | --           | immunogl     | -- | ko04020 C | --           | -- | --          |
| None | -- | --           | immunogl     | -- | ko04020 C | --           | -- | --          |
| None | -- | --           | --           | -- | --        | --           | -- | --          |
| None | -- | --           | --           | -- | --        | --           | -- | --          |
| None | -- | --           | --           | -- | --        | --           | -- | --          |
| None | -- | --           | immunogl     | -- | ko04020 C | --           | -- | --          |
| None | -- | --           | immunogl     | -- | ko04020 C | --           | -- | --          |
| down | -- | --           | immunogl     | -- | ko04020 C | --           | -- | --          |
| None | -- | --           | --           | -- | --        | --           | -- | --          |
| None | -- | --           | immunogl     | -- | ko04020 C | --           | -- | --          |
| None | -- | --           | --           | -- | --        | --           | -- | --          |
| None | -- | --           | --           | -- | --        | --           | -- | --          |
| None | -- | --           | immunogl     | -- | ko04020 C | --           | -- | --          |
| None | -- | --           | immunogl     | -- | ko04020 C | --           | -- | --          |
| None | -- | --           | --           | -- | --        | --           | -- | --          |
| None | -- | --           | --           | -- | --        | --           | -- | --          |
| None | -- | --           | --           | -- | --        | --           | -- | --          |
| None | -- | --           | immunogl     | -- | ko04020 C | --           | -- | --          |
| None | -- | --           | immunogl     | -- | ko04020 C | --           | -- | --          |
| None | -- | --           | --           | -- | --        | --           | -- | --          |
| None | -- | --           | --           | -- | --        | --           | -- | --          |
| None | -- | --           | immunogl     | -- | ko04020 C | --           | -- | --          |
| None | -- | --           | --           | -- | --        | --           | -- | --          |
| None | -- | --           | immunogl     | -- | ko04020 C | --           | -- | --          |
| None | -- | --           | --           | -- | --        | --           | -- | --          |
| None | -- | --           | --           | -- | --        | --           | -- | --          |
| None | -- | --           | immunogl     | -- | ko04020 C | --           | -- | --          |
| None | -- | --           | --           | -- | --        | --           | -- | --          |
| None | -- | --           | immunogl     | -- | ko04020 C | --           | -- | --          |
| None | -- | --           | --           | -- | --        | --           | -- | --          |
| None | -- | --           | --           | -- | --        | --           | -- | --          |
| None | -- | --           | immunogl     | -- | ko04020 C | --           | -- | --          |
| None | -- | --           | --           | -- | --        | --           | -- | --          |
| None | -- | --           | immunogl     | -- | ko04020 C | --           | -- | --          |
| None | -- | --           | dedicator    | -- | ko04062 C | --           | -- | --          |
| None |    | 1 Biological | Rho GTPas    | -- | --        | --           | -- | --          |
| None | -- | --           | --           | -- | --        | --           | -- | --          |
| None | -- | --           | --           | -- | --        | --           | -- | --          |
| None | -- | --           | --           | -- | --        | --           | -- | --          |
| None | -- | --           | --           | -- | --        | --           | -- | --          |
| None | -- | --           | --           | -- | --        | --           | -- | --          |
| None | -- | --           | --           | -- | --        | --           | -- | --          |
| None | -- | --           | --           | -- | --        | --           | -- | --          |
| None | -- | --           | immunogl     | -- | ko04020 C | --           | -- | --          |
| None | -- | --           | immunogl     | -- | ko04020 C | --           | -- | --          |
| None | -- | --           | --           | -- | --        | --           | -- | --          |
| None | -- | --           | serpin pep   | -- | --        | Serine pro O | -- | Posttransla |
| None |    | 1 Molecular  | low affinity | -- | ko04145 P | --           | -- | --          |
| None |    | 1 Molecular  | fibrillin 1  | -- | --        | --           | -- | --          |
| down | -- | --           | C1 inhibitc  | -- | ko04610 C | Serine pro O | -- | Posttransla |
| None | -- | --           | gelsolin     | -- | ko04666 F | --           | -- | --          |

|      |    |    |              |                  |           |         |    |             |                  |
|------|----|----|--------------|------------------|-----------|---------|----|-------------|------------------|
| None | -- | -- | intercellula | --               | ko04064   | N       | -- | --          | --               |
| None |    | 2  | Molecular    | fibronectin      | --        | ko04151 | P  | Phage-rel   | X Mobilome:      |
| None |    | 1  | Biological   | nidogen (ε       | --        | --      |    | Glucose/ar  | G Carbohydr      |
| None | -- | -- | --           | --               | --        | --      | -- | --          | --               |
| None |    | 1  | Molecular    | transgelin       | --        | --      | -- | --          | --               |
| None |    | 1  | Molecular    | lumican          | --        | ko05205 | P  | Leucine-ric | K Transcripti    |
| None | -- | -- | --           | beta-2-gly       | --        | ko04979 | C  | --          | --               |
| None | -- | -- | --           | clusterin        | --        | ko04610 | C  | --          | --               |
| None | -- | -- | --           | heat shock       | --        | ko03040 | S  | Molecular   | O Posttransla    |
| None |    | 1  | Biological   | cathelicidin     | --        | ko04621 | N  | --          | --               |
| None |    | 1  | Molecular    | tubulin beta     | --        | ko04145 | P  | --          | --               |
| None |    | 3  | Molecular    | catalase         | 1.11.1.6  | ko00380 | T  | Catalase    | P Inorganic i    |
| None |    | 1  | Molecular    | --               | --        | ko00760 | N  | --          | --               |
| None | -- | -- | --           | adiponectin      | --        | ko03320 | P  | Type V sec  | MU Cell wall/r   |
| None | -- | -- | --           | --               | --        | --      | -- | --          | --               |
| None |    | 2  | Molecular    | complement       | 3.4.21.41 | ko04145 | P  | Secreted    | t1 O Posttransla |
| None |    | 4  | Molecular    | urotensin II     | --        | --      | -- | --          | --               |
| None | -- | -- | --           | --               | --        | --      | -- | --          | --               |
| None |    | 2  | Molecular    | hemoglobin       | --        | --      | -- | --          | --               |
| None | -- | -- | --           | --               | --        | --      | -- | --          | --               |
| None | -- | -- | --           | --               | --        | --      | -- | --          | --               |
| None | -- | -- | --           | immunoglobulin   | --        | ko04020 | C  | --          | --               |
| None | -- | -- | --           | --               | --        | --      | -- | --          | --               |
| None | -- | -- | --           | immunoglobulin   | --        | ko04020 | C  | --          | --               |
| None | -- | -- | --           | immunoglobulin   | --        | ko04020 | C  | --          | --               |
| None | -- | -- | --           | pre-B lymphocyte | --        | --      | -- | --          | --               |
| None | -- | -- | --           | --               | --        | --      | -- | --          | --               |
| None | -- | -- | --           | large subunit    | --        | ko03010 | R  | Ribosomal   | J Translatior    |
| None | -- | -- | --           | transferrin      | --        | ko04066 | H  | --          | --               |
| None | -- | -- | --           | immunoglobulin   | --        | ko04020 | C  | --          | --               |
| None | -- | -- | --           | --               | --        | --      | -- | --          | --               |
| None | -- | -- | --           | --               | --        | --      | -- | --          | --               |
| None | -- | -- | --           | --               | --        | --      | -- | --          | --               |
| None | -- | -- | --           | --               | --        | --      | -- | --          | --               |
| None | -- | -- | --           | immunoglobulin   | --        | ko04020 | C  | --          | --               |
| None | -- | -- | --           | --               | --        | --      | -- | --          | --               |
| None | -- | -- | --           | --               | --        | --      | -- | --          | --               |
| None | -- | -- | --           | --               | --        | --      | -- | --          | --               |
| None | -- | -- | --           | --               | --        | --      | -- | --          | --               |
| None | -- | -- | --           | --               | --        | --      | -- | --          | --               |
| None | -- | -- | --           | --               | --        | --      | -- | --          | --               |
| None | -- | -- | --           | --               | --        | --      | -- | --          | --               |
| None | -- | -- | --           | --               | --        | --      | -- | --          | --               |
| None | -- | -- | --           | --               | --        | --      | -- | --          | --               |
| None | -- | -- | --           | --               | --        | --      | -- | --          | --               |
| None | -- | -- | --           | immunoglobulin   | --        | ko04020 | C  | --          | --               |
| None | -- | -- | --           | immunoglobulin   | --        | ko04020 | C  | --          | --               |
| None | -- | -- | --           | immunoglobulin   | --        | ko04020 | C  | --          | --               |
| None | -- | -- | --           | immunoglobulin   | --        | ko04020 | C  | --          | --               |
| None | -- | -- | --           | immunoglobulin   | --        | ko04020 | C  | --          | --               |

|      |    |               |              |           |           |              |     |              |
|------|----|---------------|--------------|-----------|-----------|--------------|-----|--------------|
| None | -- | --            | --           | --        | --        | --           | --  | --           |
| None | -- | --            | --           | --        | --        | --           | --  | --           |
| None | -- | --            | immunogl     | --        | ko04020 C | --           | --  | --           |
| None | -- | --            | immunogl     | --        | ko04020 C | --           | --  | --           |
| None | -- | --            | --           | --        | --        | --           | --  | --           |
| None | -- | --            | --           | --        | --        | --           | --  | --           |
| None | -- | --            | --           | --        | --        | --           | --  | --           |
| None | -- | --            | --           | --        | --        | --           | --  | --           |
| None | -- | --            | --           | --        | --        | --           | --  | --           |
| None | -- | --            | --           | --        | --        | --           | --  | --           |
| None | -- | --            | --           | --        | --        | --           | --  | --           |
| None | -- | --            | immunogl     | --        | ko04020 C | --           | --  | --           |
| None | -- | --            | --           | --        | --        | --           | --  | --           |
| None | -- | --            | --           | --        | --        | --           | --  | --           |
| None | -- | --            | immunogl     | --        | ko04020 C | --           | --  | --           |
| None | -- | --            | immunogl     | --        | ko04020 C | --           | --  | --           |
| None | -- | --            | immunogl     | --        | ko04020 C | --           | --  | --           |
| None | -- | --            | immunogl     | --        | ko04020 C | --           | --  | --           |
| up   | -- | --            | immunogl     | --        | ko04020 C | --           | --  | --           |
| None | -- | --            | --           | --        | --        | --           | --  | --           |
| None | -- | --            | immunogl     | --        | ko04020 C | --           | --  | --           |
| None | -- | 2 Molecular   | inter-alpha  | --        | --        | Secreted p R | --  | General fu   |
| up   | -- | --            | macrophag    | 2.7.10.1  | ko04010 M | --           | --  | --           |
| None | -- | --            | N-acetylgl   | --        | ko04142 L | --           | --  | --           |
| None | -- | 4 Cellular Cc | apolipoprc   | --        | ko03320 P | --           | --  | --           |
| None | -- | --            | --           | --        | --        | --           | --  | --           |
| None | -- | 2 Molecular   | anthrax tox  | --        | ko04621 N | --           | --  | --           |
| None | -- | --            | --           | --        | ko01100 M | Alkyl hydr   | V   | Defense m    |
| None | -- | 1 Biological  | glyceralde   | 1.2.1.12  | ko00010 G | Glyceralde   | G   | Carbohydr    |
| None | -- | 5 Molecular   | alpha-mar    | 3.2.1.114 | ko00510 N | Uncharact    | S   | Function u   |
| None | -- | 3 Molecular   | ceruloplas   | 1.16.3.1  | ko00860 P | Multicopp    | DPM | Cell cycle c |
| None | -- | --            | --           | --        | --        | --           | --  | --           |
| None | -- | --            | transthyret  | --        | ko04918 T | 5-hydroxy    | F   | Nucleotide   |
| None | -- | 3 Biological  | insulin-like | --        | ko04115 p | --           | --  | --           |
| None | -- | 2 Molecular   | componen     | 3.4.21.46 | ko04610 C | Secreted t   | O   | Posttransla  |
| None | -- | --            | angiopoiet   | --        | ko04979 C | --           | --  | --           |
| None | -- | 1 Molecular   | osteoglyci   | --        | --        | Leucine-ric  | K   | Transcripti  |
| None | -- | --            | --           | --        | --        | --           | --  | --           |
| None | -- | 2 Biological  | beta-Ala-l   | 3.4.13.20 | ko00330 A | Acetylornit  | E   | Amino acid   |
| None | -- | 1 Molecular   | compleme     | --        | ko04610 C | --           | --  | --           |
| None | -- | 3 Molecular   | --           | --        | --        | Uncharact    | R   | General fu   |
| None | -- | 2 Biological  | gamma-gl     | 3.4.19.9  | ko00790 F | Gamma-g      | E   | Amino acid   |
| up   | -- | 3 Molecular   | thrombos     | --        | ko04145 P | Alpha-tub    | DZ  | Cell cycle c |
| None | -- | 3 Biological  | peptidyl-p   | 5.2.1.8   | ko04217 N | Peptidyl-p   | O   | Posttransla  |
| None | -- | --            | compleme     | --        | ko04610 C | --           | --  | --           |
| None | -- | 2 Molecular   | insulin-like | --        | ko04010 M | --           | --  | --           |
| None | -- | 2 Molecular   | interleukin  | --        | ko04010 M | --           | --  | --           |
| None | -- | --            | --           | --        | --        | Uncharact    | R   | General fu   |
| None | -- | 2 Molecular   | type II ker  | --        | --        | --           | --  | --           |
| None | -- | 1 Molecular   | elongation   | --        | ko03013 R | Translatior  | J   | Translatior  |
| None | -- | 1 Cellular Cc | serum albu   | --        | ko04918 T | --           | --  | --           |
| None | -- | 1 Molecular   | poly [ADP    | 2.4.2.30  | --        | --           | --  | --           |
| None | -- | 1 Cellular Cc | neuropilin   | --        | ko04360 A | PKD repea    | S   | Function u   |
| None | -- | 1 Molecular   | insulin-like | --        | --        | Leucine-ric  | K   | Transcripti  |
| up   | -- | 1 Molecular   | cubilin      | --        | ko04977 V | --           | --  | --           |
| None | -- | 5 Molecular   | --           | --        | --        | Secreted t   | O   | Posttransla  |
| None | -- | --            | angiotensi   | --        | ko04614 R | Serine pro   | O   | Posttransla  |

|      |    |    |            |               |           |         |             |             |              |
|------|----|----|------------|---------------|-----------|---------|-------------|-------------|--------------|
| None |    | 1  | Molecular  | fibulin 1/2   | --        | --      | --          | --          | --           |
| None | -- | -- | --         | --            | --        | --      | --          | --          | --           |
| None | -- | -- |            | immunogl      | --        | ko04020 | C           | --          | --           |
| None | -- | -- | --         | --            | --        | --      | --          | --          | --           |
| down | -- | -- | --         | --            | --        | --      | --          | --          | --           |
| None | -- | -- |            | caspase 14    | 3.4.22.-  | --      | --          | --          | --           |
| None |    | 2  | Molecular  | leukocyte c   | 3.4.21.37 | ko05202 | T           | Secreted t  | O            |
| down | -- | -- |            | lysozyme (    | 3.2.1.17  | ko04970 | S           | --          | --           |
| None | -- | -- |            | protein S1    | --        | ko04657 | IL          | --          | --           |
| None | -- | -- |            | histone H4    | --        | ko05034 | A           | --          | --           |
| None |    | 1  | Cellular   | Cc serum amy  | --        | --      | --          | --          | --           |
| None |    | 1  | Molecular  | --            | --        | --      | --          | --          | --           |
| None |    | 2  | Molecular  | lymphatic     | '         | --      | --          | --          | --           |
| None | -- | -- |            | peptidase     | --        | --      | Uncharact   | S           | Function u   |
| None |    | 1  | Molecular  | --            | --        | ko00010 | G           | --          | --           |
| down |    | 1  | Biological | --            | --        | --      | Negative r  | O           | Posttransla  |
| None |    | 1  | Molecular  | --            | --        | --      | --          | --          | --           |
| None |    | 2  | Biological | glycogen p    | 2.4.1.1   | ko00500 | S           | Glucan ph   | G            |
| None | -- | -- | --         | --            | --        | --      | --          | --          | --           |
| None | -- | -- |            | monocyte      | --        | ko04010 | M           | --          | --           |
| None |    | 1  | Molecular  | creatine ki   | 2.7.3.2   | ko00330 | A           | Protein-ar  | O            |
| None |    | 3  | Molecular  | --            | --        | --      | Uncharact   | R           | General fu   |
| None |    | 1  | Biological | --            | --        | --      | Thiol-disul | O           | Posttransla  |
| None |    | 1  | Molecular  | glutathion    | 2.5.1.18  | ko00480 | G           | Glutathion  | O            |
| None | -- | -- | --         | --            | --        | --      | --          | --          | --           |
| None | -- | -- |            | integrin al   | --        | ko04015 | R           | Ca2+-binc   | Q            |
| None |    | 1  | Biological | Di-N-acet     | 3.2.1.-   | --      | Spore gerr  | D           | Cell cycle c |
| None |    | 1  | Cellular   | Cc serum albu | --        | ko04918 | T           | --          | --           |
| None |    | 1  | Molecular  | inhibin, be   | --        | ko04350 | T           | --          | --           |
| None | -- | -- |            | serpin pep    | --        | --      | Serine pro  | O           | Posttransla  |
| None |    | 2  | Molecular  | adenylyl cy   | --        | --      | --          | --          | --           |
| None |    | 2  | Molecular  | --            | --        | --      | Secreted p  | R           | General fu   |
| None | -- | -- |            | lipocalin 2   | --        | ko04657 | IL          | --          | --           |
| None |    | 1  | Molecular  | metallope     | --        | ko04066 | H           | --          | --           |
| None | -- | -- | --         | --            | --        | --      | --          | --          | --           |
| None | -- | -- |            | heat shock    | --        | ko03040 | S           | dsDNA-sp    | L            |
| None |    | 1  | Molecular  | phospholi     | --        | ko03320 | P           | --          | --           |
| None |    | 1  | Molecular  | --            | --        | --      | --          | --          | --           |
| None |    | 1  | Molecular  | --            | --        | --      | --          | --          | --           |
| None |    | 1  | Biological | ceramide c    | 2.4.1.47  | ko00565 | E           | --          | --           |
| None | -- | -- |            | transferrin   | --        | ko04066 | H           | --          | --           |
| None | -- | -- | --         | --            | --        | --      | --          | --          | --           |
| None | -- | -- |            | --            | --        | ko00052 | G           | Glycosyltra | G            |
| None |    | 3  | Molecular  | coagulatio    | 3.4.21.21 | ko04610 | C           | Secreted t  | O            |
| None |    | 1  | Cellular   | Cc serum albu | --        | ko04918 | T           | --          | --           |
| None | -- | -- |            | phosphatic    | 3.1.3.86  | ko00562 | lr          | --          | --           |
| None |    | 1  | Molecular  | tubulin alp   | --        | ko04145 | P           | --          | --           |
| None |    | 1  | Molecular  | compleme      | --        | ko04145 | P           | Uncharact   | R            |
| None | -- | -- |            | CDW93 an      | --        | --      | --          | --          | --           |
| None | -- | -- |            | carbonic a    | 4.2.1.1   | ko00910 | N           | Carbonic a  | P            |
| None |    | 2  | Molecular  | triosephos    | 5.3.1.1   | ko00010 | G           | Triosephos  | G            |
| None |    | 1  | Molecular  | fibulin 1/2   | --        | --      | --          | --          | --           |
| None |    | 3  | Molecular  | Rho GTPa      | --        | ko04530 | T           | --          | --           |
| None | -- | -- |            | beta-2-mi     | --        | ko04612 | A           | --          | --           |
| None | -- | -- |            | transferrin   | --        | ko04066 | H           | --          | --           |
| None |    | 1  | Molecular  | kininogen     | --        | ko04610 | C           | ABC-type    | P            |
| None | -- | -- |            | compleme      | --        | ko04610 | C           | --          | --           |
| None | -- | -- |            | compleme      | --        | ko04610 | C           | --          | --           |

|      |    |    |           |                |           |         |    |               |     |    |              |
|------|----|----|-----------|----------------|-----------|---------|----|---------------|-----|----|--------------|
| None |    | 2  | Molecular | component      | 3.4.21.47 | ko04610 | C  | Secreted      | t   | O  | Posttransla  |
| None |    | 1  | Cellular  | Cc lysosomal   | --        | ko04140 | A  | --            | --  | -- | --           |
| None |    | 1  | Cellular  | Cc             | --        | --      |    | Serine pro    | O   |    | Posttransla  |
| None | -- | -- | --        | compleme       | --        | ko04610 | C  | --            | --  | -- | --           |
| None | -- | -- | --        | immunogl       | --        | ko04020 | C  | --            | --  | -- | --           |
| None |    | 1  | Molecular | compleme       | --        | ko04610 | C  | Uncharact     | R   |    | General fu   |
| None | -- | -- | --        | inter-alpha    | --        | --      |    | Secreted p    | R   |    | General fu   |
| None |    | 1  | Molecular | compleme       | --        | ko04610 | C  | --            | --  | -- | --           |
| None |    | 2  | Molecular | ADAM-like      | 3.4.24.-  | --      | -- | --            | --  | -- | --           |
| None |    | 1  | Molecular | myosin ligl    | --        | ko04270 | V  | Ca2+ -binc    | T   |    | Signal tran  |
| None |    | 1  | Molecular | --             | --        | --      | -- | --            | --  | -- | --           |
| down |    | 3  | Molecular | thrombosç      | --        | ko04145 | P  | Alpha-tub     | DZ  |    | Cell cycle c |
| None |    | 1  | Molecular | --             | --        | --      | -- | --            | --  | -- | --           |
| None | -- | -- | --        | --             | --        | --      |    | Secreted p    | R   |    | General fu   |
| None |    | 3  | Molecular | cadherin 1     | --        | --      |    | Large exoç    | U   |    | Intracellula |
| None |    | 2  | Cellular  | Cc             | --        | --      | -- | --            | --  | -- | --           |
| None | -- | -- | --        | podocalyxi     | --        | --      | -- | --            | --  | -- | --           |
| None |    | 2  | Molecular | neprilysin     | 3.4.24.11 | ko04614 | R  | Predicted     | ı   | O  | Posttransla  |
| None |    | 3  | Molecular | alpha-amy      | 3.2.1.1   | ko00500 | S  | Glycosidas    | G   |    | Carbohydr    |
| None |    | 3  | Molecular | --             | --        | --      | -- | --            | --  | -- | --           |
| None |    | 1  | Molecular | collagen, t    | --        | ko04151 | P  | Autotransç    | UW  |    | Intracellula |
| None | -- | -- | --        | mannose r      | --        | ko04145 | P  | Ca2+ -binc    | Q   |    | Secondary    |
| None |    | 2  | Molecular | apolipoprc     | --        | ko04975 | F  | PPE-repea     | S   |    | Function u   |
| None |    | 1  | Molecular | troponin C     | --        | ko04020 | C  | Ca2+ -binc    | T   |    | Signal tran  |
| None | -- | -- | --        | transferrin    | --        | ko04066 | H  | --            | --  | -- | --           |
| down | -- | -- | --        | apolipoprc     | --        | --      |    | Bacterial liç | M   |    | Cell wall/m  |
| None |    | 2  | Molecular | cytochrom      | --        | ko00920 | S  | Cytochrom     | C   |    | Energy prc   |
| None |    | 2  | Molecular | CD163 ant      | --        | --      | -- | --            | --  | -- | --           |
| None |    | 1  | Molecular | tissue factr   | --        | ko04610 | C  | --            | --  | -- | --           |
| None |    | 5  | Molecular | fibrinogen     | --        | ko04610 | C  | --            | --  | -- | --           |
| None | -- | -- | --        | 14-3-3 prc     | --        | ko04110 | C  | --            | --  | -- | --           |
| None | -- | -- | --        | actin, aorti   | --        | ko04270 | V  | Actin-relat   | Z   |    | Cytoskelet   |
| None | -- | -- | --        | cholinester    | 3.1.1.8   | --      |    | Carboxyleç    | I   |    | Lipid trans  |
| None |    | 4  | Molecular | --             | --        | --      | -- | --            | --  | -- | --           |
| None |    | 1  | Cellular  | Cc serum amy   | --        | --      | -- | --            | --  | -- | --           |
| None | -- | -- | --        | --             | --        | --      |    | Uncharact     | S   |    | Function u   |
| down |    | 3  | Molecular | collagen, t    | --        | ko04974 | P  | Autotransç    | UW  |    | Intracellula |
| None | -- | -- | --        | intercellula   | --        | ko04514 | C  | --            | --  | -- | --           |
| None |    | 3  | Cellular  | Cc platelet ba | --        | ko04060 | C  | --            | --  | -- | --           |
| None |    | 2  | Molecular | myeloblast     | 3.4.21.76 | --      |    | Secreted t    | O   |    | Posttransla  |
| up   |    | 1  | Molecular | ceruloplası    | 1.16.3.1  | ko00860 | P  | Multicoppı    | DPM |    | Cell cycle c |
| None |    | 1  | Cellular  | Cc vitamin D-  | --        | --      | -- | --            | --  | -- | --           |
| None |    | 3  | Molecular | cadherin 6     | --        | --      |    | Large exoç    | U   |    | Intracellula |
| None |    | 2  | Molecular | hemoglob       | --        | ko05143 | A  | --            | --  | -- | --           |
| None |    | 3  | Molecular | vitronectin    | --        | ko04151 | P  | --            | --  | -- | --           |
| up   | -- | -- | --        | apolipoprc     | --        | ko04975 | F  | --            | --  | -- | --           |
| None | -- | -- | --        | fatty acid-    | --        | ko03320 | P  | --            | --  | -- | --           |
| None |    | 5  | Molecular | protein C (    | 3.4.21.69 | ko04610 | C  | Secreted t    | O   |    | Posttransla  |
| None |    | 3  | Molecular | cyclin-dep     | 2.7.11.22 | --      |    | PASTA dor     | M   |    | Cell wall/m  |
| None |    | 5  | Molecular | compleme       | 3.4.21.45 | ko04610 | C  | Secreted t    | O   |    | Posttransla  |
| None |    | 7  | Molecular | ectonuclec     | 3.1.4.39  | ko00565 | E  | Predicted     | ı   | R  | General fu   |
| None | -- | -- | --        | hydroxypy      | 5.3.1.22  | ko00630 | G  | Hydroxypy     | G   |    | Carbohydr    |
| None | -- | -- | --        | alpha-1-aı     | --        | ko04610 | C  | Serine pro    | O   |    | Posttransla  |
| None | -- | -- | --        | C1 inhibitc    | --        | ko04610 | C  | Serine pro    | O   |    | Posttransla  |
| None |    | 2  | Molecular | cofilin        | --        | ko04360 | A  | --            | --  | -- | --           |
| None |    | 5  | Molecular | coagulatio     | 3.4.21.22 | ko04610 | C  | Secreted t    | O   |    | Posttransla  |
| None |    | 1  | Cellular  | Cc serum albt  | --        | ko04918 | T  | --            | --  | -- | --           |
| up   | -- | -- | --        | --             | --        | --      | -- | --            | --  | -- | --           |

|      |    |    |                   |             |            |               |               |             |              |
|------|----|----|-------------------|-------------|------------|---------------|---------------|-------------|--------------|
| None | -- | -- | --                | --          | --         | --            | --            | --          |              |
| None | -- | -- | --                | --          | --         | --            | --            | --          |              |
| None | -- | -- | transferrin       | --          | ko04066    | HZn-depende   | O             | Posttransla |              |
| None | -- | -- | pancreatic        | 3.1.27.5    | --         | --            | --            | --          |              |
| None | -- | -- | serpin pep        | --          | --         | Serine pro    | O             | Posttransla |              |
| None | -- | 2  | Molecular         | --          | --         | Secreted tr   | O             | Posttransla |              |
| None | -- | -- | breast can        | 2.3.2.27    | ko01524    | P             | --            | --          |              |
| None | -- | 5  | Molecular         | plasma kal  | 3.4.21.34  | ko04610       | C Secreted tr | O           | Posttransla  |
| None | -- | -- | platelet de       | --          | ko01521    | E             | --            | --          |              |
| None | -- | -- | vitronectin       | --          | ko04151    | P             | --            | --          |              |
| None | -- | 2  | Molecular         | type II ker | --         | --            | Uncharact     | S           | Function u   |
| None | -- | -- | --                | --          | --         | --            | --            | --          |              |
| None | -- | 2  | Molecular         | semaphori   | --         | ko04360       | A             | --          | --           |
| None | -- | -- | cysteine-ri       | --          | --         | --            | Uncharact     | S           | Function u   |
| None | -- | 2  | Molecular         | fructose-b  | 4.1.2.13   | ko00010       | G Fructose-t  | G           | Carbohydr    |
| None | -- | -- | reelin            | 3.4.21.-    | ko04151    | P PKD repea   | S             | Function u  |              |
| None | -- | 2  | Biological        | membrane    | 3.4.13.19  | --            | Zn-depende    | E           | Amino acic   |
| None | -- | -- | --                | --          | --         | --            | --            | --          | --           |
| None | -- | 4  | Biological        | apolipoprc  | --         | ko04979       | C             | --          | --           |
| None | -- | 4  | Molecular         | molecular   | --         | ko04141       | P Molecular   | O           | Posttransla  |
| None | -- | -- | --                | --          | --         | --            | --            | --          | --           |
| None | -- | 1  | Molecular         | von Willeb  | --         | ko04151       | P Secreted p  | R           | General fu   |
| None | -- | -- | synaptota         | --          | --         | --            | --            | --          | --           |
| None | -- | -- | alpha-solu        | --          | ko04721    | S             | --            | --          | --           |
| None | -- | -- | compleme          | --          | ko04145    | P             | --            | --          | --           |
| None | -- | 2  | Molecular         | Notch 3     | --         | ko01522       | E             | --          | --           |
| None | -- | 3  | Molecular         | mannan-b    | 3.4.21.104 | ko04610       | C Secreted tr | O           | Posttransla  |
| None | -- | 2  | Molecular         | plexin B    | --         | ko04360       | A Type V sec  | MU          | Cell wall/m  |
| None | -- | -- | beta-1,4- $\zeta$ | 2.4.1.-     | ko00512    | M Glycosyltra | G             | Carbohydr   |              |
| None | -- | -- | --                | --          | --         | --            | --            | --          | --           |
| None | -- | 2  | Molecular         | --          | --         | --            | --            | --          | --           |
| None | -- | 5  | Molecular         | --          | --         | ko04140       | A Serine/thr  | T           | Signal tran  |
| None | -- | -- | ficolin           | --          | --         | --            | Type V sec    | MU          | Cell wall/m  |
| None | -- | 2  | Molecular         | --          | --         | --            | N-acetylne    | M           | Cell wall/m  |
| None | -- | -- | --                | --          | --         | --            | --            | --          | --           |
| None | -- | 5  | Molecular         | --          | --         | ko00030       | P Glucose-6   | G           | Carbohydr    |
| None | -- | 1  | Biological        | pantethein  | 3.5.1.92   | ko00770       | P Predicted   | R           | General fu   |
| None | -- | -- | --                | --          | --         | --            | --            | --          | --           |
| None | -- | 2  | Molecular         | L-lactate c | 1.1.1.27   | ko00010       | G Malate/lac  | C           | Energy pro   |
| None | -- | 3  | Molecular         | coagulatio  | --         | ko04610       | C Multicopp   | DPM         | Cell cycle c |
| None | -- | 2  | Molecular         | coagulatio  | 2.3.2.13   | ko04610       | C             | --          | --           |
| None | -- | 2  | Molecular         | phosphogl   | 2.7.2.3    | ko00010       | G 3-phosph    | G           | Carbohydr    |
| None | -- | 5  | Molecular         | coagulatio  | 3.4.21.5   | ko04080       | N Secreted tr | O           | Posttransla  |
| None | -- | 2  | Molecular         | haptoglob   | --         | --            | Secreted tr   | O           | Posttransla  |
| None | -- | 2  | Molecular         | haptoglob   | --         | ko05143       | A Secreted tr | O           | Posttransla  |
| None | -- | 5  | Molecular         | coagulatio  | 3.4.21.6   | ko04610       | C Secreted tr | O           | Posttransla  |
| None | -- | 2  | Molecular         | plasminog   | 3.4.21.7   | ko04080       | N Secreted tr | O           | Posttransla  |
| None | -- | 4  | Molecular         | coagulatio  | 3.4.21.38  | ko04610       | C Secreted tr | O           | Posttransla  |
| up   | -- | -- | carbonic a        | 4.2.1.1     | ko00910    | N Carbonic a  | P             | Inorganic i |              |
| None | -- | 3  | Molecular         | alpha-2-n   | --         | ko04610       | C Uncharact   | R           | General fu   |
| None | -- | 3  | Molecular         | compleme    | --         | ko04145       | P Uncharact   | R           | General fu   |
| None | -- | 3  | Molecular         | compleme    | --         | ko04610       | C Uncharact   | R           | General fu   |
| None | -- | -- | --                | --          | --         | --            | --            | --          | --           |
| None | -- | -- | --                | --          | --         | --            | --            | --          | --           |
| None | -- | -- | --                | --          | --         | --            | --            | --          | --           |
| None | -- | -- | pre-B lym         | --          | --         | --            | --            | --          | --           |
| None | -- | -- | --                | --          | --         | --            | --            | --          | --           |
| None | -- | -- | immunogl          | --          | ko04020    | C             | --            | --          | --           |

|      |    |               |              |           |            |             |    |              |
|------|----|---------------|--------------|-----------|------------|-------------|----|--------------|
| None | -- | --            | immunogl     | --        | ko04020 C  | --          | -- | --           |
| None | -- | --            | polymeric    | --        | ko04672 Ir | --          | -- | --           |
| None | -- | --            | --           | --        | --         | --          | -- | --           |
| None |    | 2 Molecular   | collagen, t  | --        | ko04151 P  | Autotransç  | UW | Intracellula |
| None |    | 2 Molecular   | type I kera  | --        | --         | --          | -- | --           |
| None | -- | --            | apolipoprc   | --        | ko03320 P  | --          | -- | --           |
| None |    | 5 Molecular   | fibrinogen   | --        | ko04610 C  | PPE-repea   | S  | Function u   |
| None |    | 5 Molecular   | fibrinogen   | --        | ko04610 C  | --          | -- | --           |
| None |    | 5 Molecular   | fibrinogen   | --        | ko04610 C  | --          | -- | --           |
| None | -- | --            | C-reactive   | --        | --         | Autotransç  | U  | Intracellula |
| None | -- | --            | --           | --        | --         | Autotransç  | U  | Intracellula |
| None |    | 1 Molecular   | --           | --        | --         | Heme-bin    | P  | Inorganic i  |
| None |    | 2 Molecular   | fibronectin  | --        | ko04151 P  | Phage-relç  | X  | Mobilome:    |
| None | -- | --            | retinol-bin  | --        | --         | --          | -- | --           |
| None |    | 1 Molecular   | --           | --        | --         | --          | -- | --           |
| None | -- | --            | alpha-1-a    | --        | --         | --          | -- | --           |
| None |    | 1 Cellular Cc | serum albu   | --        | ko04918 T  | --          | -- | --           |
| None |    | 3 Cellular Cc | platelet fac | --        | ko04060 C  | --          | -- | --           |
| None | -- | --            | transferrin  | --        | ko04066 H  | --          | -- | --           |
| None | -- | --            | hemopexin    | --        | --         | --          | -- | --           |
| None | -- | --            | angiogenin   | 3.1.27.-  | --         | --          | -- | --           |
| None |    | 2 Molecular   | coagulatio   | 3.4.21.27 | ko04610 C  | Secreted t  | O  | Posttransla  |
| None | -- | --            | compleme     | --        | ko04610 C  | --          | -- | --           |
| None |    | 1 Molecular   | --           | --        | --         | --          | -- | --           |
| None |    | 1 Molecular   | --           | --        | --         | --          | -- | --           |
| None |    | 1 Molecular   | von Willeb   | --        | ko04151 P  | Secreted p  | R  | General fu   |
| None | -- | --            | --           | --        | --         | --          | -- | --           |
| None | -- | --            | coagulatio   | --        | ko04610 C  | --          | -- | --           |
| None | -- | --            | myeloperc    | 1.11.2.2  | ko04145 P  | Ca2+ -binc  | Q  | Secondary    |
| None | -- | --            | thyroxine-   | --        | ko04918 T  | Serine pro  | O  | Posttransla  |
| None | -- | --            | heparin co   | --        | ko04610 C  | Serine pro  | O  | Posttransla  |
| None |    | 2 Molecular   | type II kera | --        | --         | --          | -- | --           |
| None |    | 1 Molecular   | myosin ligl  | --        | --         | Ca2+ -binc  | T  | Signal tran  |
| None | -- | --            | --           | --        | --         | --          | -- | --           |
| None |    | 4 Cellular Cc | apolipoprc   | --        | ko04975 F  | Chromoso    | D  | Cell cycle c |
| None |    | 2 Molecular   | L-lactate c  | 1.1.1.27  | ko00010 G  | Malate/lac  | C  | Energy prc   |
| None | -- | --            | asialoglycc  | --        | ko04918 T  | Uncharact   | R  | General fu   |
| None |    | 1 Molecular   | compleme     | --        | ko04610 C  | --          | -- | --           |
| None | -- | --            | compleme     | --        | ko04610 C  | --          | -- | --           |
| None | -- | --            | profilin     | --        | ko04015 R  | --          | -- | --           |
| None |    | 4 Molecular   | thrombosç    | --        | ko04015 R  | Alpha-tub   | DZ | Cell cycle c |
| None |    | 2 Molecular   | cathepsin    | 3.4.21.20 | ko04080 N  | Secreted t  | O  | Posttransla  |
| None |    | 2 Molecular   | apolipoprc   | 3.4.21.-  | ko04979 C  | Secreted t  | O  | Posttransla  |
| None |    | 4 Molecular   | receptor-t   | 3.1.3.48  | ko04514 C  | Protein tyr | T  | Signal tran  |
| None | -- | --            | compleme     | --        | ko04610 C  | --          | -- | --           |
| None |    | 2 Molecular   | vimentin     | --        | ko05169 E  | --          | -- | --           |
| None | -- | --            | alpha-2-a    | --        | ko04610 C  | Serine pro  | O  | Posttransla  |
| None |    | 2 Molecular   | type I kera  | --        | --         | --          | -- | --           |
| None |    | 3 Molecular   | dopamine     | 1.14.17.1 | ko00350 T  | Cytochron   | C  | Energy prc   |
| None |    | 2 Molecular   | compleme     | 3.4.21.42 | ko04610 C  | Secreted t  | O  | Posttransla  |
| None |    | 3 Molecular   | compleme     | --        | ko04610 C  | Uncharact   | R  | General fu   |
| None |    | 3 Molecular   | compleme     | --        | ko04610 C  | Uncharact   | R  | General fu   |
| None |    | 1 Cellular Cc | serum amy    | --        | --         | --          | -- | --           |
| None |    | 1 Cellular Cc | serum amy    | --        | --         | --          | -- | --           |
| None | -- | --            | immunogl     | --        | ko04020 C  | --          | -- | --           |
| None | -- | --            | immunogl     | --        | ko04020 C  | --          | -- | --           |
| None | -- | --            | --           | --        | --         | --          | -- | --           |
| None | -- | --            | --           | --        | --         | --          | -- | --           |

|      |    |    |             |              |             |         |               |               |              |              |
|------|----|----|-------------|--------------|-------------|---------|---------------|---------------|--------------|--------------|
| None | -- | -- | immunogl    | --           | ko04020     | C       | --            | --            | --           |              |
| None | -- | -- | --          | --           | --          | --      | --            | --            | --           |              |
| down | -- | -- | --          | --           | --          | --      | --            | --            | --           |              |
| None | -- | -- | --          | --           | --          | --      | --            | --            | --           |              |
| None | -- | -- | --          | --           | --          | --      | --            | --            | --           |              |
| None | -- | -- | immunogl    | --           | ko04020     | C       | --            | --            | --           |              |
| None |    | 3  | Molecular   | receptor-t   | 3.1.3.48    | ko04514 | C             | Protein tyr T | Signal tran  |              |
| None | -- | -- | heat shock  | --           | ko03060     | P       | Molecular     | O             | Posttransla  |              |
| None | -- | -- | mannose-    | --           | ko04145     | P       | Spore coat    | M             | Cell wall/m  |              |
| None |    | 1  | Cellular    | Cc           | --          | --      | --            | --            | --           |              |
| None |    | 3  | Molecular   | myosin he    | --          | ko04530 | T             | Uncharact     | S            | Function u   |
| None |    | 2  | Molecular   | type I kera  | --          | --      | --            | --            | --           |              |
| None |    | 2  | Molecular   | type II kera | --          | --      | --            | --            | --           |              |
| None |    | 1  | Molecular   | compleme     | --          | ko04610 | C             | --            | --           |              |
| None |    | 4  | Molecular   | pyruvate k   | 2.7.1.40    | ko00010 | G             | Phosphohi     | T            | Signal tran  |
| None |    | 4  | Molecular   | heat shock   | --          | ko04141 | P             | Molecular     | O            | Posttransla  |
| None |    | 4  | Molecular   | matrix met   | 3.4.24.35   | ko01522 | E             | Predicted     | U            | Posttransla  |
| None |    | 3  | Molecular   | carboxype    | 3.4.17.3    | --      | Bacillopep    | O             | Posttransla  |              |
| None | -- | -- | immunogl    | --           | --          | --      | --            | --            | --           |              |
| None |    | 1  | Cellular    | Cc           | desmoplak   | --      | ko05412       | A             | --           | --           |
| None |    | 3  | Biological  | --           | --          | --      | --            | --            | --           |              |
| None |    | 1  | Molecular   | lipopolysac  | --          | ko04064 | N             | --            | --           |              |
| None |    | 2  | Biological  | vascular ce  | --          | ko04064 | N             | --            | --           |              |
| None | -- | -- | alpha-1-a   | --           | --          | --      | --            | --            | --           |              |
| None |    | 2  | Molecular   | inter-alpha  | --          | --      | Secreted p    | R             | General fu   |              |
| None |    | 2  | Molecular   | --           | --          | --      | Secreted t    | O             | Posttransla  |              |
| None | -- | -- | compleme    | --           | ko04610     | C       | --            | --            | --           |              |
| None |    | 1  | Molecular   | filamin      | --          | ko04010 | M             | Autotrans     | U            | Intracellula |
| None |    | 1  | Molecular   | carboxype    | --          | --      | Leucine-ric   | K             | Transcripti  |              |
| None | -- | -- | --          | --           | --          | --      | --            | --            | --           |              |
| None |    | 1  | Molecular   | fibulin 1/2  | --          | --      | --            | --            | --           |              |
| None |    | 3  | Biological  | peptidyl-p   | 5.2.1.8     | --      | Peptidyl-p    | O             | Posttransla  |              |
| None |    | 3  | Molecular   | receptor-t   | 3.1.3.48    | --      | Protein tyr T |               | Signal tran  |              |
| None |    | 1  | Molecular   | --           | --          | --      | --            | --            | --           |              |
| None |    | 3  | Biological  | --           | --          | --      | --            | --            | --           |              |
| None |    | 3  | Cellular    | Cc           | moesin      | --      | ko04530       | T             | --           | --           |
| None |    | 1  | Molecular   | --           | --          | --      | Sugar lact    | G             | Carbohydr    |              |
| None |    | 2  | Biological  | dipeptidyl-  | 3.4.14.5    | ko04974 | P             | Dipeptidyl    | E            | Amino acid   |
| None |    | 1  | Molecular   | peroxiredc   | 1.11.1.15   | ko04146 | P             | Peroxiredc    | O            | Posttransla  |
| None |    | 3  | Molecular   | cadherin 5   | --          | ko04514 | C             | Large exo     | U            | Intracellula |
| None |    | 3  | Molecular   | mannosyl-    | 3.2.1.113   | ko00510 | N             | --            | --           | --           |
| None | -- | -- | ribonuclea  | 3.1.27.-     | --          | --      | --            | --            | --           |              |
| None |    | 2  | Molecular   | type I kera  | --          | --      | --            | --            | --           |              |
| None |    | 1  | Cellular    | Cc           | serum amy   | --      | --            | --            | --           |              |
| None |    | 2  | Molecular   | type II kera | --          | --      | Uncharact     | S             | Function u   |              |
| None |    | 1  | Biological  | biotinidase  | 3.5.1.12    | ko00780 | B             | --            | --           |              |
| None |    | 1  | Cellular    | Cc           | --          | --      | --            | --            | --           |              |
| None |    | 2  | Molecular   | mannan-b     | 3.4.21.-    | ko04610 | C             | Secreted t    | O            | Posttransla  |
| None |    | 1  | Molecular   | inhibin, be  | --          | ko04350 | T             | --            | --           |              |
| None |    | 2  | Cellular    | Cc           | defensin, a | --      | --            | --            | --           |              |
| None | -- | -- | actin beta/ | --           | ko04015     | R       | Actin-relat   | Z             | Cytoskelet   |              |
| None |    | 1  | Molecular   | amyloid-lil  | --          | --      | --            | --            | --           |              |
| None | -- | -- | glycosylph  | 3.1.4.50     | ko00563     | G       | Cytolysin, i  | U             | Intracellula |              |
| None | -- | -- | brain acid  | --           | --          | --      | --            | --            | --           |              |
| None |    | 3  | Cellular    | Cc           | --          | --      | --            | --            | --           |              |
| None | -- | -- | --          | --           | --          | --      | --            | --            | --           |              |
| None | -- | -- | --          | --           | --          | --      | --            | --            | --           |              |
| None |    | 2  | Molecular   | type I kera  | --          | --      | --            | --            | --           |              |



|      |    |               |                      |           |               |               |             |
|------|----|---------------|----------------------|-----------|---------------|---------------|-------------|
| None |    | 4 Molecular   | hepatocyte 3.4.21.-  | --        |               | Secreted tı O | Posttransla |
| None |    | 2 Molecular   | --                   | --        |               | Secreted p R  | General fu  |
| None | -- | --            | --                   | --        |               | --            | --          |
| None |    | 2 Molecular   | low-densit --        | ko04979 C | Glucose/ar G  |               | Carbohydr   |
| None |    | 3 Molecular   | desmocolli --        | --        |               | PKD repea S   | Function u  |
| None | -- | --            | --                   | --        |               | --            | --          |
| down | -- | --            | --                   | --        |               | Ca2+ -binc Q  | Secondary   |
| None |    | 2 Molecular   | type II kera --      | --        |               | --            | --          |
| None | -- | --            | --                   | --        |               | --            | --          |
| None | -- | --            | immunogl --          | ko04020 C | --            | --            | --          |
| None | -- | --            | immunogl --          | ko04020 C | --            | --            | --          |
| None | -- | --            | immunogl --          | ko04020 C | --            | --            | --          |
| None | -- | --            | --                   | --        |               | --            | --          |
| None | -- | --            | --                   | --        |               | --            | --          |
| None | -- | --            | immunogl --          | ko04020 C | --            | --            | --          |
| None | -- | --            | immunogl --          | ko04020 C | --            | --            | --          |
| None | -- | --            | immunogl --          | ko04020 C | --            | --            | --          |
| up   | -- | --            | --                   | --        |               | --            | --          |
| None | -- | --            | --                   | --        |               | --            | --          |
| None | -- | --            | --                   | --        |               | --            | --          |
| None | -- | --            | immunogl --          | ko04020 C | --            | --            | --          |
| None | -- | --            | --                   | --        |               | --            | --          |
| None | -- | 1 Molecular   | --                   | --        |               | --            | --          |
| None |    | 2 Cellular Cc | --                   | --        |               | --            | --          |
| None |    | 1 Molecular   | --                   | --        |               | --            | --          |
| None | -- | --            | pappalysin 3.4.24.79 | --        |               | PKD repea S   | Function u  |
| None | -- | --            | --                   | --        |               | --            | --          |
| None |    | 3 Molecular   | desmoglei --         | ko05412 A | Large exoç U  |               | Intracellu  |
| None |    | 3 Molecular   | hyaluronar 3.4.21.-  | --        |               | Secreted tı O | Posttransla |
| None |    | 2 Molecular   | plastin-1 --         | --        |               | --            | --          |
| None | -- | --            | --                   | --        |               | --            | --          |
| None |    | 1 Molecular   | --                   | --        |               | Sugar lactç G | Carbohydr   |
| None | -- | --            | ficolin --           | --        |               | Type V sec MU | Cell wall/m |
| None |    | 1 Molecular   | cystatin-M --        | --        |               | --            | --          |
| None | -- | --            | alpha-1-aı --        | ko04610 C | Serine proı O |               | Posttransla |
| None |    | 2 Molecular   | hemoglob --          | ko05143 A | --            | --            | --          |
| None |    | 2 Molecular   | compleme 3.4.21.41   | ko04145 P | Secreted tı O |               | Posttransla |
| None | -- | --            | angiotensi --        | ko04614 R | Serine proı O |               | Posttransla |
| None | -- | --            | --                   | --        |               | --            | --          |
| None |    | 1 Cellular Cc | serum albu --        | ko04918 T | --            | --            | --          |
| up   | -- | --            | --                   | --        |               | --            | --          |
| None | -- | --            | filaggrin --         | --        |               | Autotransç UW | Intracellu  |
| None | -- | --            | --                   | --        |               | --            | --          |
| None | -- | --            | --                   | --        |               | --            | --          |
| None | -- | --            | --                   | --        |               | --            | --          |
| None | -- | --            | intelectin --        | --        |               | --            | --          |
| None | -- | --            | --                   | --        |               | --            | --          |
| None | -- | --            | --                   | --        |               | --            | --          |
| None | -- | --            | pre-B lymç --        | --        |               | --            | --          |
| None | -- | --            | --                   | --        |               | --            | --          |
| up   | -- | --            | pre-B lymç --        | --        |               | --            | --          |
| None | -- | --            | --                   | --        |               | --            | --          |
| None | -- | --            | pre-B lymç --        | --        |               | --            | --          |
| None | -- | --            | --                   | --        |               | --            | --          |
| None |    | 1 Molecular   | --                   | --        |               | Heme-binı P   | Inorganic i |
| None | -- | --            | --                   | --        |               | --            | --          |

|      |    |             |              |           |           |             |               |
|------|----|-------------|--------------|-----------|-----------|-------------|---------------|
| None | -- | --          | --           | --        | --        | --          | --            |
| None | -- | --          | C-type lec   | --        | --        | Uncharacter | General fu    |
| None | -- | --          | --           | --        | --        | --          | --            |
| None | -- | 1 Molecular | --           | --        | --        | Leucine-ric | Transcripti   |
| None | -- | --          | --           | --        | --        | --          | --            |
| None | -- | --          | --           | --        | --        | --          | --            |
| None | -- | --          | --           | --        | --        | --          | --            |
| down | -- | 3 Molecular | compleme     | 3.4.21.45 | ko04610 C | --          | --            |
| up   | -- | --          | --           | --        | --        | --          | --            |
| None | -- | 2 Molecular | mannan-b     | 3.4.21.-  | ko04610 C | Secreted tr | O Posttransla |
| None | -- | --          | --           | --        | --        | --          | --            |
| down | -- | --          | immunogl     | --        | ko04020 C | --          | --            |
| None | -- | --          | immunogl     | --        | ko04020 C | --          | --            |
| None | -- | --          | --           | --        | --        | --          | --            |
| up   | -- | --          | --           | --        | --        | --          | --            |
| None | -- | --          | --           | --        | --        | --          | --            |
| None | -- | --          | --           | --        | --        | --          | --            |
| None | -- | --          | --           | --        | --        | --          | --            |
| None | -- | --          | --           | --        | --        | --          | --            |
| None | -- | --          | --           | --        | --        | --          | --            |
| None | -- | --          | --           | --        | --        | --          | --            |
| None | -- | --          | --           | --        | --        | --          | --            |
| None | -- | --          | --           | --        | --        | --          | --            |
| None | -- | --          | --           | --        | --        | --          | --            |
| None | -- | --          | --           | --        | --        | --          | --            |
| None | -- | --          | --           | --        | --        | --          | --            |
| None | -- | --          | --           | --        | --        | --          | --            |
| None | -- | 3 Cellular  | Cc sperm equ | --        | --        | --          | --            |
| None | -- | --          | --           | --        | --        | --          | --            |
| None | -- | --          | peptidase    | --        | --        | Uncharacter | S Function u  |
| None | -- | 3 Molecular | CD109 ant    | --        | --        | Uncharacter | R General fu  |
| None | -- | --          | pre-B lym    | --        | --        | --          | --            |
| None | -- | --          | immunogl     | --        | ko04020 C | --          | --            |
| None | -- | --          | --           | --        | --        | --          | --            |
| None | -- | --          | --           | --        | --        | --          | --            |
| None | -- | 2 Molecular | type II ker  | --        | --        | --          | --            |
| None | -- | 2 Molecular | a disintegr  | 3.4.24.87 | --        | --          | --            |
| None | -- | --          | --           | --        | --        | --          | --            |
| None | -- | --          | --           | --        | --        | --          | --            |
| None | -- | --          | --           | --        | --        | --          | --            |
| None | -- | --          | immunogl     | --        | ko04020 C | --          | --            |
| None | -- | --          | immunogl     | --        | ko04020 C | --          | --            |
| None | -- | --          | --           | --        | --        | --          | --            |
| None | -- | --          | serpin pep   | --        | --        | Serine pro  | O Posttransla |
| None | -- | --          | --           | --        | --        | --          | --            |
| None | -- | --          | kindlin 3    | --        | ko04611 P | --          | --            |
| None | -- | --          | --           | --        | --        | --          | --            |
| None | -- | 2 Molecular | hemoglob     | --        | ko05143 A | --          | --            |
| None | -- | --          | --           | --        | --        | --          | --            |
| None | -- | --          | immunogl     | --        | ko04020 C | --          | --            |
| None | -- | 2 Molecular | protein C (  | 3.4.21.69 | ko04610 C | Secreted tr | O Posttransla |
| None | -- | 2 Molecular | type II ker  | --        | --        | --          | --            |
| None | -- | --          | --           | --        | --        | --          | --            |
| down | -- | 2 Molecular | proprotein   | 3.4.21.-  | ko04979 C | Serine pro  | O Posttransla |
| None | -- | --          | --           | --        | --        | --          | --            |
| None | -- | --          | --           | --        | --        | --          | --            |

|      |    |               |                      |    |                        |    |    |              |
|------|----|---------------|----------------------|----|------------------------|----|----|--------------|
| None | -- | --            | --                   | -- | --                     | -- | -- | --           |
| up   | -- | --            | --                   | -- | --                     | -- | -- | --           |
| None | -- | --            | apolipopro           | -- | ko04979 C              | -- | -- | --           |
| None | -- | --            | --                   | -- | --                     | -- | -- | --           |
| None | -- | --            | --                   | -- | --                     | -- | -- | --           |
| None |    | 4 Biological  | HtrA serinε 3.4.21.- | -- | Periplasmic O          |    |    | Posttransla  |
| None |    | 2 Molecular   | neogenin             | -- | ko04514 C Phage-relε X |    |    | Mobilome     |
| None | -- | --            | mediator c           | -- | ko04919 T              | -- | -- | --           |
| None | -- | --            | pre-B lymph          | -- | --                     | -- | -- | --           |
| None | -- | --            | --                   | -- | --                     | -- | -- | --           |
| None | -- | --            | immunogl             | -- | ko04020 C              | -- | -- | --           |
| None |    | 2 Molecular   | peptidogly           | -- | N-acetylm M            |    |    | Cell wall/m  |
| None | -- | --            | --                   | -- | --                     | -- | -- | --           |
| up   | -- | --            | --                   | -- | --                     | -- | -- | --           |
| None | -- | --            | collectin st         | -- | ko04145 P Spore coat M |    |    | Cell wall/m  |
| None |    | 3 Molecular   | cadherin-r           | -- | Large exoε U           |    |    | Intracellula |
| None |    | 2 Molecular   | --                   | -- | Secreted tı O          |    |    | Posttransla  |
| None | -- | --            | --                   | -- | --                     | -- | -- | --           |
| None |    | 2 Biological  | adipocyte            | -- | Sugar lactε G          |    |    | Carbohydr    |
| None | -- | --            | --                   | -- | --                     | -- | -- | --           |
| None | -- | --            | --                   | -- | --                     | -- | -- | --           |
| None |    | 4 Cellular Cc | --                   | -- | --                     | -- | -- | --           |
| None |    | 2 Molecular   | --                   | -- | Secreted tı O          |    |    | Posttransla  |
| None |    | 1 Molecular   | --                   | -- | --                     | -- | -- | --           |
| None |    | 2 Biological  | --                   | -- | ko00900 T Protoporp H  |    |    | Coenzyme     |
| None |    | 2 Molecular   | hemoglob             | -- | ko05143 A              | -- | -- | --           |
| None | -- | --            | --                   | -- | --                     | -- | -- | --           |
| None | -- | --            | immunogl             | -- | ko04020 C              | -- | -- | --           |
| None | -- | --            | immunogl             | -- | ko04020 C              | -- | -- | --           |
| None | -- | --            | pre-B lymph          | -- | --                     | -- | -- | --           |
| None | -- | --            | --                   | -- | --                     | -- | -- | --           |
| None | -- | --            | immunogl             | -- | ko04020 C              | -- | -- | --           |
| None | -- | --            | --                   | -- | --                     | -- | -- | --           |
| up   | -- | --            | --                   | -- | --                     | -- | -- | --           |
| up   | -- | --            | --                   | -- | --                     | -- | -- | --           |
| None | -- | --            | --                   | -- | --                     | -- | -- | --           |
| None | -- | --            | --                   | -- | --                     | -- | -- | --           |
| None | -- | --            | --                   | -- | --                     | -- | -- | --           |
| None | -- | --            | --                   | -- | --                     | -- | -- | --           |
| None | -- | --            | immunogl             | -- | ko04020 C              | -- | -- | --           |
| None |    | 2 Biological  | --                   | -- | Protein-tyı T          |    |    | Signal tran  |
| None |    | 1 Cellular Cc | --                   | -- | Uncharactε R           |    |    | General fu   |
| None | -- | --            | V-set and            | -- | ko04610 C              | -- | -- | --           |
| None | -- | --            | immunogl             | -- | ko04020 C              | -- | -- | --           |
| None |    | 3 Molecular   | myosin he            | -- | ko04530 T Chromoso D   |    |    | Cell cycle c |
| None | -- | --            | --                   | -- | Large exoε U           |    |    | Intracellula |
| None | -- | --            | --                   | -- | --                     | -- | -- | --           |
| None | -- | --            | immunogl             | -- | ko04020 C              | -- | -- | --           |
| None | -- | --            | --                   | -- | --                     | -- | -- | --           |
| None | -- | --            | --                   | -- | --                     | -- | -- | --           |
| None | -- | --            | immunogl             | -- | ko04020 C              | -- | -- | --           |
| None | -- | --            | --                   | -- | --                     | -- | -- | --           |
| up   | -- | --            | immunogl             | -- | ko04020 C              | -- | -- | --           |
| None | -- | --            | --                   | -- | --                     | -- | -- | --           |
| None | -- | --            | --                   | -- | --                     | -- | -- | --           |
| None | -- | --            | --                   | -- | --                     | -- | -- | --           |
| None | -- | --            | --                   | -- | --                     | -- | -- | --           |

|      |    |               |             |          |           |    |    |    |
|------|----|---------------|-------------|----------|-----------|----|----|----|
| None | -- | --            | --          | --       | --        | -- | -- | -- |
| None | -- | --            | --          | --       | --        | -- | -- | -- |
| None | -- | --            | --          | --       | --        | -- | -- | -- |
| None | -- | --            | immunogl    | --       | ko04020 C | -- | -- | -- |
| None | -- | 1 Cellular Cc | vitamin D-  | --       | --        | -- | -- | -- |
| None | -- | --            | lactotransf | 3.4.21.- | --        | -- | -- | -- |

IPR\_Term

IPR002048 [EF-hand domain]  
IPR006077 [Vinculin/alpha-catenin]  
IPR003119 [Saposin A-type domain] ; IPR007856 [Saposin-like type B, region 1] ; IPR008138 [Saposin-like type B, region 2]  
IPR007125 [Histone H2A/H2B/H3]  
IPR007125 [Histone H2A/H2B/H3] ; IPR032454 [Histone H2A, C-terminal domain]  
IPR000884 [Thrombospondin type-1 (TSP1) repeat] ; IPR002172 [Low-density lipoprotein (LDL) receptor type I domain]  
IPR006781 [Apolipoprotein C-I]  
IPR006689 [Small GTPase superfamily, ARF/SAR type]  
IPR000741 [Fructose-bisphosphate aldolase, class-I]  
IPR008405 [Apolipoprotein L]  
IPR001609 [Myosin head, motor domain] ; IPR002928 [Myosin tail] ; IPR004009 [Myosin, N-terminal domain]  
IPR000716 [Thyroglobulin type-1] ; IPR000867 [Insulin-like growth factor-binding protein, IGFBP]  
IPR000225 [Armadillo]  
IPR001304 [C-type lectin-like]  
IPR000668 [Peptidase C1A, papain C-terminal] ; IPR012599 [Peptidase C1A, propeptide]  
IPR000074 [Apolipoprotein A/E]  
IPR013106 [Immunoglobulin V-set domain] ; IPR013151 [Immunoglobulin] ; IPR013162 [CD80-like, C-terminal domain]  
IPR002223 [Pancreatic trypsin inhibitor Kunitz domain] ; IPR011178 [Amyloidogenic glycoprotein, C-terminal domain]  
IPR000716 [Thyroglobulin type-1] ; IPR000867 [Insulin-like growth factor-binding protein, IGFBP]  
IPR025256 [Domain of unknown function DUF4203]  
IPR020810 [Enolase, C-terminal TIM barrel domain] ; IPR020811 [Enolase, N-terminal]  
IPR000322 [Glycoside hydrolase family 31] ; IPR025887 [Glycoside hydrolase family 31, N-terminal domain]  
IPR001452 [SH3 domain] ; IPR003134 [Hs1/Cortactin]  
IPR018502 [Annexin repeat]  
IPR001715 [Calponin homology domain] ; IPR002017 [Spectrin repeat] ; IPR014837 [EF-hand, Ca-binding site]  
IPR001881 [EGF-like calcium-binding domain] ; IPR026823 [Complement C1r-like EGF domain]  
IPR023796 [Serpine domain]  
IPR000562 [Fibronectin, type II, collagen-binding] ; IPR001818 [Peptidase M10, metallopeptidase] ; IPR002181 [Fibrinogen, alpha/beta/gamma chain, C-terminal globular domain]  
IPR013768 [Intercellular adhesion molecule, N-terminal]  
IPR001806 [Small GTPase superfamily]  
IPR002181 [Fibrinogen, alpha/beta/gamma chain, C-terminal globular domain] ; IPR003961 [Fibrinogen, alpha/beta/gamma chain, N-terminal globular domain]  
IPR000884 [Thrombospondin type-1 (TSP1) repeat] ; IPR010294 [ADAM-TS Spacer 1] ; IPR010909 [ADAM-TS Spacer 2]  
IPR000566 [Lipocalin/cytosolic fatty-acid binding domain]  
IPR013766 [Thioredoxin domain]  
IPR012496 [TMC]  
IPR001212 [Somatomedin B domain] ; IPR018487 [Hemopexin-like repeats]  
IPR023796 [Serpine domain]  
IPR007484 [Peptidase M28]  
IPR001304 [C-type lectin-like] ; IPR008160 [Collagen triple helix repeat]  
IPR032174 [Intron-binding protein aquarius, N-terminal]  
IPR001073 [C1q domain] ; IPR008160 [Collagen triple helix repeat]  
IPR000034 [Laminin IV] ; IPR000742 [EGF-like domain] ; IPR001791 [Laminin G domain] ; IPR002048 [Laminin G domain]  
IPR001073 [C1q domain] ; IPR008160 [Collagen triple helix repeat]  
IPR001073 [C1q domain] ; IPR008160 [Collagen triple helix repeat]  
--  
IPR001806 [Small GTPase superfamily]  
IPR014782 [Peptidase M1, membrane alanine aminopeptidase, N-terminal] ; IPR024571 [ERAP1-like domain]  
IPR000048 [IQ motif, EF-hand binding site] ; IPR000593 [RasGAP protein, C-terminal] ; IPR001715 [RasGAP protein, N-terminal]  
IPR000082 [SEA domain] ; IPR000203 [GPS motif] ; IPR000832 [GPCR, family 2, secretin-like] ; IPR000082 [GPCR, family 2, secretin-like]  
IPR005065 [Platelet-activating factor acetylhydrolase-like]  
IPR002350 [Kazal domain] ; IPR013098 [Immunoglobulin I-set]  
IPR002350 [Kazal domain] ; IPR015369 [Follistatin/Osteonectin EGF domain] ; IPR019577 [SPARC/Thrombospondin type-1 repeat]



IPR013106 [Immunoglobulin V-set domain]  
 --  
 IPR013106 [Immunoglobulin V-set domain]  
 IPR000074 [Apolipoprotein A/E]  
 IPR001881 [EGF-like calcium-binding domain] ; IPR011519 [ASPIC/UnbV]  
 IPR000372 [Leucine-rich repeat N-terminal domain] ; IPR001611 [Leucine-rich repeat]  
 IPR013106 [Immunoglobulin V-set domain]  
 IPR000980 [SH2 domain] ; IPR001660 [Sterile alpha motif domain]  
 IPR000001 [Kringle] ; IPR001254 [Serine proteases, trypsin domain] ; IPR003609 [PAN/Apple domain]  
 IPR013106 [Immunoglobulin V-set domain]  
 IPR000504 [RNA recognition motif domain]  
 IPR013106 [Immunoglobulin V-set domain]  
 IPR000436 [Sushi/SCR/CCP domain] ; IPR001304 [C-type lectin-like]  
 IPR013106 [Immunoglobulin V-set domain]  
 IPR000533 [Tropomyosin]  
 IPR000010 [Cystatin domain]  
 IPR000971 [Globin]  
 IPR003597 [Immunoglobulin C1-set] ; IPR013106 [Immunoglobulin V-set domain]  
 IPR000001 [Kringle] ; IPR000083 [Fibronectin, type I] ; IPR000562 [Fibronectin, type II, collagen-binding]  
 IPR000074 [Apolipoprotein A/E]  
 IPR001124 [Lipid-binding serum glycoprotein, C-terminal] ; IPR017942 [Lipid-binding serum glyco  
 IPR001190 [SRCR domain] ; IPR011705 [BTB/Kelch-associated]  
 IPR001664 [Intermediate filament protein] ; IPR032444 [Keratin type II head]  
 IPR001881 [EGF-like calcium-binding domain] ; IPR026823 [Complement C1r-like EGF domain]  
 IPR000884 [Thrombospondin type-1 (TSP1) repeat]  
 IPR000294 [Gamma-carboxyglutamic acid-rich (GLA) domain] ; IPR000742 [EGF-like domain] ; IPR  
 IPR000782 [FAS1 domain]  
 IPR024395 [CLASP N-terminal domain]  
 IPR011161 [MHC class I-like antigen recognition-like]  
 --  
 IPR013106 [Immunoglobulin V-set domain]













IPR013106 [Immunoglobulin V-set domain]  
 IPR013106 [Immunoglobulin V-set domain]  
 IPR013106 [Immunoglobulin V-set domain]  
 IPR013106 [Immunoglobulin V-set domain]  
 IPR013106 [Immunoglobulin V-set domain]  
 IPR013106 [Immunoglobulin V-set domain]  
 IPR013106 [Immunoglobulin V-set domain]  
 IPR013106 [Immunoglobulin V-set domain]  
 IPR013106 [Immunoglobulin V-set domain]  
 IPR003597 [Immunoglobulin C1-set] ; IPR013106 [Immunoglobulin V-set domain]  
 IPR002035 [von Willebrand factor, type A] ; IPR010600 [Inter-alpha-trypsin inhibitor heavy chain, C  
 IPR013151 [Immunoglobulin]  
 IPR009011 [Mannose-6-phosphate receptor binding domain]  
 IPR008403 [Apolipoprotein CIII]  
 IPR003597 [Immunoglobulin C1-set] ; IPR013106 [Immunoglobulin V-set domain]  
 IPR002035 [von Willebrand factor, type A] ; IPR008399 [Anthrax toxin receptor, C-terminal] ; IPR008  
 --  
 IPR020829 [Glyceraldehyde 3-phosphate dehydrogenase, catalytic domain]  
 IPR000602 [Glycoside hydrolase family 38, N-terminal domain] ; IPR011682 [Glycosyl hydrolase fam  
 IPR001117 [Multicopper oxidase, type 1] ; IPR011706 [Multicopper oxidase, type 2] ; IPR011707 [M  
 IPR028120 [Apolipoprotein C-IV]  
 IPR023416 [Transthyretin/hydroxyisourate hydrolase, superfamily]  
 IPR000716 [Thyroglobulin type-1] ; IPR000867 [Insulin-like growth factor-binding protein, IGFBP]  
 IPR001254 [Serine proteases, trypsin domain]  
 IPR002181 [Fibrinogen, alpha/beta/gamma chain, C-terminal globular domain]  
 IPR001611 [Leucine-rich repeat]  
 IPR003112 [Olfactomedin-like domain] ; IPR022082 [Noelin domain]  
 IPR002933 [Peptidase M20] ; IPR011650 [Peptidase M20, dimerisation domain]  
 IPR000436 [Sushi/SCR/CCP domain] ; IPR000884 [Thrombospondin type-1 (TSP1) repeat] ; IPR0021  
 IPR001599 [Alpha-2-macroglobulin] ; IPR002890 [Alpha-2-macroglobulin, N-terminal] ; IPR009048  
 IPR011697 [Peptidase C26]  
 IPR001881 [EGF-like calcium-binding domain] ; IPR003367 [Thrombospondin, type 3-like repeat] ;  
 IPR002130 [Cyclophilin-type peptidyl-prolyl cis-trans isomerase domain]  
 IPR000436 [Sushi/SCR/CCP domain]  
 IPR013576 [Insulin-like growth factor II E-peptide, C-terminal] ; IPR016179 [Insulin-like]  
 IPR000157 [Toll/interleukin-1 receptor homology (TIR) domain]  
 IPR001304 [C-type lectin-like]  
 IPR001664 [Intermediate filament protein] ; IPR032444 [Keratin type II head]  
 IPR004160 [Translation elongation factor EFTu/EF1A, C-terminal] ; IPR004161 [Translation elongatic  
 IPR014760 [Serum albumin, N-terminal]  
 IPR004170 [WWE domain] ; IPR012317 [Poly(ADP-ribose) polymerase, catalytic domain]  
 IPR000421 [Coagulation factor 5/8 C-terminal domain] ; IPR000859 [CUB domain] ; IPR000998 [MA  
 IPR000372 [Leucine-rich repeat N-terminal domain] ; IPR001611 [Leucine-rich repeat]  
 IPR000742 [EGF-like domain]  
 IPR000294 [Gamma-carboxyglutamic acid-rich (GLA) domain] ; IPR000742 [EGF-like domain] ; IPR  
 IPR023796 [Serpin domain]

IPR001881 [EGF-like calcium-binding domain] ; IPR026823 [Complement C1r-like EGF domain]  
 IPR013106 [Immunoglobulin V-set domain]  
 IPR013106 [Immunoglobulin V-set domain]  
 IPR013106 [Immunoglobulin V-set domain]  
 IPR013106 [Immunoglobulin V-set domain]  
 --  
 IPR001254 [Serine proteases, trypsin domain]  
 IPR001916 [Glycoside hydrolase, family 22]  
 IPR013787 [S100/CaBP-9k-type, calcium binding, subdomain]  
 --  
 IPR000096 [Serum amyloid A protein]  
 IPR002048 [EF-hand domain] ; IPR013787 [S100/CaBP-9k-type, calcium binding, subdomain]  
 IPR000538 [Link domain]  
 IPR014044 [CAP domain]  
 IPR000560 [Histidine phosphatase superfamily, clade-2]  
 IPR013766 [Thioredoxin domain]  
 IPR001124 [Lipid-binding serum glycoprotein, C-terminal] ; IPR017942 [Lipid-binding serum glyco  
 IPR000811 [Glycosyl transferase, family 35]  
 IPR004020 [DAPIN domain] ; IPR004021 [HIN-200/IF120x]  
 --  
 IPR022413 [ATP:guanido phosphotransferase, N-terminal] ; IPR022414 [ATP:guanido phosphotrans  
 IPR001599 [Alpha-2-macroglobulin] ; IPR002890 [Alpha-2-macroglobulin, N-terminal] ; IPR009048  
 IPR010400 [PITH domain] ; IPR013766 [Thioredoxin domain]  
 IPR004045 [Glutathione S-transferase, N-terminal] ; IPR004046 [Glutathione S-transferase, C-termi  
 IPR000436 [Sushi/SCR/CCP domain]  
 IPR002035 [von Willebrand factor, type A] ; IPR013517 [FG-GAP repeat] ; IPR013649 [Integrin alpha  
 IPR001223 [Glycoside hydrolase family 18, catalytic domain]  
 IPR014760 [Serum albumin, N-terminal]  
 IPR001839 [Transforming growth factor-beta, C-terminal]  
 IPR023796 [Serp domain]  
 IPR013912 [Adenylate cyclase-associated CAP, C-terminal] ; IPR013992 [Adenylate cyclase-associ  
 IPR002035 [von Willebrand factor, type A] ; IPR010600 [Inter-alpha-trypsin inhibitor heavy chain, C  
 IPR000566 [Lipocalin/cytosolic fatty-acid binding domain]  
 IPR001820 [Protease inhibitor I35 (TIMP)]  
 --  
 IPR013126 [Heat shock protein 70 family]  
 IPR001124 [Lipid-binding serum glycoprotein, C-terminal] ; IPR017942 [Lipid-binding serum glyco  
 IPR007110 [Immunoglobulin-like domain]  
 IPR001073 [C1q domain] ; IPR011489 [EMI domain]  
 IPR002213 [UDP-glucuronosyl/UDP-glucosyltransferase]  
 IPR001156 [Transferrin-like domain]  
 IPR000118 [Granulin]  
 IPR027791 [Galactosyltransferase, C-terminal] ; IPR027995 [Galactosyltransferase, N-terminal]  
 IPR000742 [EGF-like domain] ; IPR001254 [Serine proteases, trypsin domain]  
 IPR014760 [Serum albumin, N-terminal]  
 IPR000980 [SH2 domain]  
 IPR003008 [Tubulin/FtsZ, GTPase domain] ; IPR018316 [Tubulin/FtsZ, 2-layer sandwich domain]  
 IPR002890 [Alpha-2-macroglobulin, N-terminal]  
 IPR001304 [C-type lectin-like]  
 IPR001148 [Alpha carbonic anhydrase]  
 IPR000652 [Triosephosphate isomerase]  
 IPR001881 [EGF-like calcium-binding domain] ; IPR026823 [Complement C1r-like EGF domain]  
 IPR000198 [Rho GTPase-activating protein domain] ; IPR004148 [BAR domain]  
 IPR003597 [Immunoglobulin C1-set]  
 IPR001156 [Transferrin-like domain]  
 IPR000010 [Cystatin domain]  
 IPR000436 [Sushi/SCR/CCP domain]  
 IPR000436 [Sushi/SCR/CCP domain]

IPR000436 [Sushi/SCR/CCP domain] ; IPR001254 [Serine proteases, trypsin domain] ; IPR002035 [vc  
 IPR002000 [Lysosome-associated membrane glycoprotein]  
 IPR002165 [Plexin repeat]  
 IPR000436 [Sushi/SCR/CCP domain] ; IPR000884 [Thrombospondin type-1 (TSP1) repeat] ; IPR0208  
 IPR013106 [Immunoglobulin V-set domain]  
 IPR002890 [Alpha-2-macroglobulin, N-terminal]  
 IPR002035 [von Willebrand factor, type A] ; IPR013694 [VIT domain]  
 IPR002172 [Low-density lipoprotein (LDL) receptor class A repeat] ; IPR020864 [Membrane attack c  
 IPR001590 [Peptidase M12B, ADAM/reprolysin] ; IPR002870 [Peptidase M12B, propeptide]  
 IPR002048 [EF-hand domain]  
 IPR001599 [Alpha-2-macroglobulin]  
 IPR001881 [EGF-like calcium-binding domain] ; IPR003367 [Thrombospondin, type 3-like repeat] ;  
 IPR000010 [Cystatin domain]  
 IPR002035 [von Willebrand factor, type A] ; IPR013694 [VIT domain]  
 IPR002126 [Cadherin] ; IPR014868 [Cadherin prodomain]  
 IPR008605 [Extracellular matrix protein 1]  
 IPR013836 [CD34/Podocalyxin]  
 IPR008753 [Peptidase M13, N-terminal domain] ; IPR018497 [Peptidase M13, C-terminal domain]  
 IPR006047 [Glycosyl hydrolase, family 13, catalytic domain] ; IPR006048 [Alpha-amylase/branching  
 IPR000884 [Thrombospondin type-1 (TSP1) repeat] ; IPR010294 [ADAM-TS Spacer 1] ; IPR010909 [  
 IPR002035 [von Willebrand factor, type A] ; IPR002223 [Pancreatic trypsin inhibitor Kunitz domain]  
 IPR000562 [Fibronectin, type II, collagen-binding] ; IPR000772 [Ricin B, lectin domain] ; IPR001304 [  
 IPR001747 [Lipid transport protein, N-terminal] ; IPR009454 [Lipid transport, open beta-sheet] ; IPR  
 IPR002048 [EF-hand domain]  
 IPR001156 [Transferrin-like domain]  
 IPR000566 [Lipocalin/cytosolic fatty-acid binding domain]  
 IPR009056 [Cytochrome c-like domain]  
 IPR001190 [SRCR domain]  
 IPR002223 [Pancreatic trypsin inhibitor Kunitz domain]  
 IPR002181 [Fibrinogen, alpha/beta/gamma chain, C-terminal globular domain] ; IPR012290 [Fibrin  
 IPR023410 [14-3-3 domain]  
 IPR004000 [Actin family]  
 IPR002018 [Carboxylesterase, type B] ; IPR014788 [Acetylcholinesterase, tetramerisation domain]  
 IPR002350 [Kazal domain] ; IPR015369 [Follistatin/Osteonectin EGF domain] ; IPR019577 [SPARC/T  
 IPR000096 [Serum amyloid A protein]  
 IPR014044 [CAP domain]  
 IPR008160 [Collagen triple helix repeat] ; IPR010515 [Collagenase NC10/endostatin]  
 IPR013768 [Intercellular adhesion molecule, N-terminal]  
 IPR001811 [Chemokine interleukin-8-like domain]  
 IPR001254 [Serine proteases, trypsin domain]  
 IPR011707 [Multicopper oxidase, type 3]  
 IPR014760 [Serum albumin, N-terminal] ; IPR015247 [Vitamin D binding protein, domain III]  
 IPR002126 [Cadherin]  
 IPR000971 [Globin]  
 IPR001212 [Somatomedin B domain] ; IPR018487 [Hemopexin-like repeats]  
 --  
 IPR000566 [Lipocalin/cytosolic fatty-acid binding domain]  
 IPR000294 [Gamma-carboxyglutamic acid-rich (GLA) domain] ; IPR000742 [EGF-like domain] ; IPR(  
 IPR000719 [Protein kinase domain]  
 IPR001190 [SRCR domain] ; IPR001254 [Serine proteases, trypsin domain] ; IPR002172 [Low-density  
 IPR001212 [Somatomedin B domain] ; IPR001604 [DNA/RNA non-specific endonuclease] ; IPR0025  
 IPR013022 [Xylose isomerase-like, TIM barrel domain]  
 IPR023796 [Serpins domain]  
 IPR023796 [Serpins domain]  
 IPR002108 [Actin-depolymerising factor homology domain]  
 IPR000294 [Gamma-carboxyglutamic acid-rich (GLA) domain] ; IPR000742 [EGF-like domain] ; IPR(  
 IPR014760 [Serum albumin, N-terminal]  
 IPR013106 [Immunoglobulin V-set domain]

IPR013106 [Immunoglobulin V-set domain]  
 IPR013106 [Immunoglobulin V-set domain]  
 IPR003137 [PA domain] ; IPR007365 [Transferrin receptor-like, dimerisation domain] ; IPR007484 [F  
 IPR023412 [Ribonuclease A-domain]  
 IPR023796 [Serp domain]  
 IPR000001 [Kringle] ; IPR001254 [Serine proteases, trypsin domain] ; IPR003609 [PAN/Apple domai  
 --  
 IPR001128 [Cytochrome P450] ; IPR001254 [Serine proteases, trypsin domain] ; IPR003609 [PAN/Apple  
 IPR000859 [CUB domain]  
 IPR018487 [Hemopexin-like repeats]  
 IPR001664 [Intermediate filament protein] ; IPR032444 [Keratin type II head] ; IPR032449 [Keratin ty  
 IPR001791 [Laminin G domain]  
 IPR001627 [Sema domain] ; IPR002165 [Plexin repeat]  
 IPR013871 [Cysteine-rich secretory protein] ; IPR014044 [CAP domain]  
 IPR000741 [Fructose-bisphosphate aldolase, class-I]  
 IPR002861 [Reeler domain]  
 IPR008257 [Renal dipeptidase family]  
 IPR019439 [FMP27, N-terminal] ; IPR019441 [FMP27, GFWDK domain] ; IPR019443 [FMP27, C-tern  
 IPR008019 [Apolipoprotein C-II] ; IPR028120 [Apolipoprotein C-IV]  
 IPR001404 [Heat shock protein Hsp90 family] ; IPR003594 [Histidine kinase-like ATPase, C-terminal  
 --  
 IPR001007 [VWFC domain] ; IPR001846 [von Willebrand factor, type D domain] ; IPR002035 [von W  
 --  
 --  
 --  
 IPR000742 [EGF-like domain] ; IPR001881 [EGF-like calcium-binding domain] ; IPR013032 [EGF-like  
 IPR000436 [Sushi/SCR/CCP domain] ; IPR000859 [CUB domain] ; IPR001254 [Serine proteases, tryp  
 IPR001627 [Sema domain] ; IPR002165 [Plexin repeat] ; IPR002909 [IPT domain] ; IPR013548 [Plexin  
 IPR027791 [Galactosyltransferase, C-terminal] ; IPR027995 [Galactosyltransferase, N-terminal]  
 --  
 --  
 IPR001190 [SRCR domain]  
 IPR000719 [Protein kinase domain] ; IPR010513 [KEN domain]  
 IPR002181 [Fibrinogen, alpha/beta/gamma chain, C-terminal globular domain]  
 IPR000859 [CUB domain] ; IPR001304 [C-type lectin-like] ; IPR002165 [Plexin repeat] ; IPR006652 [h  
 IPR022734 [Apolipoprotein M]  
 IPR006148 [Glucosamine/galactosamine-6-phosphate isomerase] ; IPR022674 [Glucose-6-phosph  
 IPR003010 [Carbon-nitrogen hydrolase]  
 IPR013106 [Immunoglobulin V-set domain]  
 IPR001236 [Lactate/malate dehydrogenase, N-terminal] ; IPR022383 [Lactate/malate dehydrogenas  
 IPR000421 [Coagulation factor 5/8 C-terminal domain] ; IPR001117 [Multicopper oxidase, type 1] ;  
 IPR001102 [Transglutaminase, N-terminal] ; IPR002931 [Transglutaminase-like] ; IPR008958 [Transc  
 IPR001576 [Phosphoglycerate kinase]  
 IPR000001 [Kringle] ; IPR000294 [Gamma-carboxyglutamic acid-rich (GLA) domain] ; IPR001254 [S  
 IPR001254 [Serine proteases, trypsin domain]  
 IPR001254 [Serine proteases, trypsin domain]  
 IPR000294 [Gamma-carboxyglutamic acid-rich (GLA) domain] ; IPR000742 [EGF-like domain] ; IPR  
 IPR000001 [Kringle] ; IPR001254 [Serine proteases, trypsin domain] ; IPR003609 [PAN/Apple domai  
 IPR000001 [Kringle] ; IPR000083 [Fibronectin, type I] ; IPR000562 [Fibronectin, type II, collagen-binc  
 IPR001148 [Alpha carbonic anhydrase]  
 IPR001599 [Alpha-2-macroglobulin] ; IPR002890 [Alpha-2-macroglobulin, N-terminal] ; IPR009048  
 IPR000020 [Anaphylatoxin/fibulin] ; IPR001599 [Alpha-2-macroglobulin] ; IPR002890 [Alpha-2-ma  
 IPR000020 [Anaphylatoxin/fibulin] ; IPR001599 [Alpha-2-macroglobulin] ; IPR002890 [Alpha-2-ma  
 IPR024110 [Immunoglobulin J chain]  
 IPR013106 [Immunoglobulin V-set domain]  
 IPR013106 [Immunoglobulin V-set domain]  
 IPR013106 [Immunoglobulin V-set domain]  
 IPR013106 [Immunoglobulin V-set domain]  
 IPR013106 [Immunoglobulin V-set domain]



IPR013106 [Immunoglobulin V-set domain]  
 IPR013106 [Immunoglobulin V-set domain]  
 IPR003597 [Immunoglobulin C1-set]  
 IPR000885 [Fibrillar collagen, C-terminal] ; IPR001007 [VWFC domain] ; IPR008160 [Collagen triple  
 IPR001664 [Intermediate filament protein]  
 --  
 IPR002181 [Fibrinogen, alpha/beta/gamma chain, C-terminal globular domain] ; IPR012290 [Fibrin  
 IPR002181 [Fibrinogen, alpha/beta/gamma chain, C-terminal globular domain] ; IPR012290 [Fibrin  
 IPR002181 [Fibrinogen, alpha/beta/gamma chain, C-terminal globular domain] ; IPR012290 [Fibrin  
 IPR001759 [Pentraxin-related]  
 IPR001759 [Pentraxin-related]  
 IPR001611 [Leucine-rich repeat]  
 IPR000083 [Fibronectin, type I] ; IPR000562 [Fibronectin, type II, collagen-binding] ; IPR003961 [Fib  
 IPR000566 [Lipocalin/cytosolic fatty-acid binding domain]  
 IPR000566 [Lipocalin/cytosolic fatty-acid binding domain] ; IPR002223 [Pancreatic trypsin inhibitor  
 IPR000566 [Lipocalin/cytosolic fatty-acid binding domain]  
 IPR014760 [Serum albumin, N-terminal]  
 IPR001811 [Chemokine interleukin-8-like domain]  
 IPR001156 [Transferrin-like domain]  
 IPR018487 [Hemopexin-like repeats]  
 IPR023412 [Ribonuclease A-domain]  
 IPR001254 [Serine proteases, trypsin domain] ; IPR003609 [PAN/Apple domain]  
 IPR000436 [Sushi/SCR/CCP domain]  
 IPR000010 [Cystatin domain]  
 IPR007110 [Immunoglobulin-like domain]  
 IPR001007 [VWFC domain] ; IPR001846 [von Willebrand factor, type D domain] ; IPR002035 [von W  
 IPR013106 [Immunoglobulin V-set domain]  
 IPR000436 [Sushi/SCR/CCP domain]  
 IPR019791 [Haem peroxidase, animal]  
 IPR023796 [Serp domain]  
 IPR023796 [Serp domain]  
 IPR001664 [Intermediate filament protein] ; IPR032444 [Keratin type II head]  
 IPR002048 [EF-hand domain]  
 IPR013106 [Immunoglobulin V-set domain]  
 IPR000074 [Apolipoprotein A/E]  
 IPR001236 [Lactate/malate dehydrogenase, N-terminal] ; IPR022383 [Lactate/malate dehydrogenase  
 IPR001304 [C-type lectin-like] ; IPR005640 [Hepatic lectin, N-terminal]  
 IPR000884 [Thrombospondin type-1 (TSP1) repeat] ; IPR002172 [Low-density lipoprotein (LDL) rec  
 IPR000566 [Lipocalin/cytosolic fatty-acid binding domain]  
 IPR005455 [Profilin]  
 IPR000884 [Thrombospondin type-1 (TSP1) repeat] ; IPR001007 [VWFC domain] ; IPR003367 [Thro  
 IPR001254 [Serine proteases, trypsin domain]  
 IPR000001 [Kringle] ; IPR001254 [Serine proteases, trypsin domain]  
 IPR000242 [PTP type protein phosphatase] ; IPR003961 [Fibronectin type III] ; IPR016335 [Receptor  
 IPR000436 [Sushi/SCR/CCP domain]  
 IPR001664 [Intermediate filament protein] ; IPR006821 [Intermediate filament head, DNA-binding c  
 IPR023796 [Serp domain]  
 IPR001664 [Intermediate filament protein]  
 IPR000323 [Copper type II, ascorbate-dependent monooxygenase, N-terminal] ; IPR005018 [DOMI  
 IPR000436 [Sushi/SCR/CCP domain] ; IPR000859 [CUB domain] ; IPR001254 [Serine proteases, tryp  
 IPR000020 [Anaphylatoxin/fibulin] ; IPR001599 [Alpha-2-macroglobulin] ; IPR002890 [Alpha-2-ma  
 IPR000020 [Anaphylatoxin/fibulin] ; IPR001599 [Alpha-2-macroglobulin] ; IPR002890 [Alpha-2-ma  
 IPR000096 [Serum amyloid A protein]  
 IPR000096 [Serum amyloid A protein]  
 IPR003597 [Immunoglobulin C1-set] ; IPR013106 [Immunoglobulin V-set domain] ; IPR013151 [Imr  
 IPR003597 [Immunoglobulin C1-set] ; IPR013106 [Immunoglobulin V-set domain] ; IPR013151 [Imr  
 IPR003597 [Immunoglobulin C1-set] ; IPR013106 [Immunoglobulin V-set domain]  
 IPR003597 [Immunoglobulin C1-set] ; IPR013106 [Immunoglobulin V-set domain]

IPR003597 [Immunoglobulin C1-set] ; IPR013106 [Immunoglobulin V-set domain]  
 IPR003597 [Immunoglobulin C1-set] ; IPR013106 [Immunoglobulin V-set domain]  
 IPR003597 [Immunoglobulin C1-set] ; IPR013106 [Immunoglobulin V-set domain]  
 IPR013106 [Immunoglobulin V-set domain]  
 IPR013106 [Immunoglobulin V-set domain]  
 IPR013106 [Immunoglobulin V-set domain]  
 IPR000242 [PTP type protein phosphatase] ; IPR003961 [Fibronectin type III] ; IPR013098 [Immunoglobulin V-set domain]  
 IPR013126 [Heat shock protein 70 family]  
 IPR001304 [C-type lectin-like] ; IPR008160 [Collagen triple helix repeat]  
 IPR007990 [Prolactin-inducible protein]  
 IPR001609 [Myosin head, motor domain] ; IPR002928 [Myosin tail] ; IPR004009 [Myosin, N-terminal]  
 IPR001664 [Intermediate filament protein]  
 IPR001664 [Intermediate filament protein] ; IPR032444 [Keratin type II head]  
 IPR000436 [Sushi/SCR/CCP domain] ; IPR000884 [Thrombospondin type-1 (TSP1) repeat] ; IPR0021  
 IPR015793 [Pyruvate kinase, barrel] ; IPR015795 [Pyruvate kinase, C-terminal]  
 IPR001404 [Heat shock protein Hsp90 family] ; IPR003594 [Histidine kinase-like ATPase, C-terminal]  
 IPR000562 [Fibronectin, type II, collagen-binding] ; IPR001818 [Peptidase M10, metallopeptidase] ;  
 IPR000834 [Peptidase M14, carboxypeptidase A]  
 IPR003597 [Immunoglobulin C1-set]  
 IPR001101 [Plectin repeat]  
 IPR000716 [Thyroglobulin type-1] ; IPR000867 [Insulin-like growth factor-binding protein, IGFBP]  
 IPR001124 [Lipid-binding serum glycoprotein, C-terminal] ; IPR017942 [Lipid-binding serum glyco  
 IPR008424 [Immunoglobulin C2-set] ; IPR013098 [Immunoglobulin I-set] ; IPR013151 [Immunoglobulin I-set]  
 IPR000566 [Lipocalin/cytosolic fatty-acid binding domain]  
 IPR002035 [von Willebrand factor, type A] ; IPR010600 [Inter-alpha-trypsin inhibitor heavy chain, C  
 IPR001254 [Serine proteases, trypsin domain]  
 IPR000436 [Sushi/SCR/CCP domain]  
 IPR001715 [Calponin homology domain] ; IPR017868 [Filamin/ABP280 repeat-like]  
 IPR001611 [Leucine-rich repeat]  
 IPR013106 [Immunoglobulin V-set domain]  
 IPR001881 [EGF-like calcium-binding domain] ; IPR026823 [Complement C1r-like EGF domain]  
 IPR002130 [Cyclophilin-type peptidyl-prolyl cis-trans isomerase domain]  
 IPR000242 [PTP type protein phosphatase] ; IPR001148 [Alpha carbonic anhydrase] ; IPR003961 [Fil  
 IPR008435 [Corticotropin-releasing factor-binding protein]  
 IPR000716 [Thyroglobulin type-1] ; IPR000867 [Insulin-like growth factor-binding protein, IGFBP]  
 IPR011259 [Ezrin/radixin/moesin, C-terminal] ; IPR018979 [FERM, N-terminal] ; IPR018980 [FERM, C  
 IPR002640 [Arylesterase]  
 IPR001375 [Peptidase S9, prolyl oligopeptidase, catalytic domain] ; IPR002469 [Dipeptidylpeptidase  
 IPR013740 [Redoxin]  
 IPR000233 [Cadherin, cytoplasmic domain] ; IPR002126 [Cadherin]  
 IPR001382 [Glycoside hydrolase family 47]  
 IPR023412 [Ribonuclease A-domain]  
 IPR001664 [Intermediate filament protein]  
 IPR000096 [Serum amyloid A protein]  
 IPR001664 [Intermediate filament protein] ; IPR032444 [Keratin type II head]  
 IPR003010 [Carbon-nitrogen hydrolase]  
 IPR014760 [Serum albumin, N-terminal]  
 IPR000436 [Sushi/SCR/CCP domain] ; IPR000859 [CUB domain] ; IPR001254 [Serine proteases, tryp  
 IPR001839 [Transforming growth factor-beta, C-terminal]  
 IPR002366 [Defensin propeptide] ; IPR006081 [Alpha-defensin]  
 IPR004000 [Actin family]  
 IPR002223 [Pancreatic trypsin inhibitor Kunitz domain]  
 IPR013517 [FG-GAP repeat] ; IPR029002 [Phospholipase C/D]  
 IPR008408 [Brain acid soluble protein 1]  
 IPR028130 [Dermcidin]  
 IPR000436 [Sushi/SCR/CCP domain]  
 IPR000436 [Sushi/SCR/CCP domain]  
 IPR001664 [Intermediate filament protein]

IPR000001 [Kringle] ; IPR000083 [Fibronectin, type I] ; IPR000562 [Fibronectin, type II, collagen-binding  
 IPR002035 [von Willebrand factor, type A] ; IPR010600 [Inter-alpha-trypsin inhibitor heavy chain, C  
 --  
 IPR000033 [LDLR class B repeat] ; IPR001881 [EGF-like calcium-binding domain] ; IPR002172 [Low-  
 IPR000233 [Cadherin, cytoplasmic domain] ; IPR002126 [Cadherin] ; IPR014868 [Cadherin prodoma  
 IPR002181 [Fibrinogen, alpha/beta/gamma chain, C-terminal globular domain]  
 --  
 IPR001664 [Intermediate filament protein] ; IPR032444 [Keratin type II head]  
 IPR003597 [Immunoglobulin C1-set] ; IPR013106 [Immunoglobulin V-set domain]  
 IPR002350 [Kazal domain] ; IPR015369 [Follistatin/Osteonectin EGF domain]  
 IPR010892 [Secreted phosphoprotein 24]  
 IPR000742 [EGF-like domain] ; IPR001073 [C1q domain] ; IPR011489 [EMI domain]  
 IPR000436 [Sushi/SCR/CCP domain] ; IPR008754 [Peptidase M43, pregnancy-associated plasma-A]  
 IPR026114 [Apolipoprotein F]  
 IPR002126 [Cadherin]  
 IPR000001 [Kringle] ; IPR000742 [EGF-like domain] ; IPR001254 [Serine proteases, trypsin domain]  
 IPR001715 [Calponin homology domain] ; IPR002048 [EF-hand domain]  
 IPR000859 [CUB domain] ; IPR018933 [Netrin module, non-TIMP type]  
 IPR002640 [Arylesterase]  
 IPR002181 [Fibrinogen, alpha/beta/gamma chain, C-terminal globular domain] ; IPR008160 [Collag  
 IPR000010 [Cystatin domain]  
 IPR023796 [Serpine domain]  
 IPR000971 [Globin]  
 IPR000436 [Sushi/SCR/CCP domain] ; IPR000859 [CUB domain] ; IPR001254 [Serine proteases, trypt  
 IPR023796 [Serpine domain]  
 IPR003597 [Immunoglobulin C1-set] ; IPR013106 [Immunoglobulin V-set domain]  
 IPR014760 [Serum albumin, N-terminal]  
 IPR003597 [Immunoglobulin C1-set] ; IPR013106 [Immunoglobulin V-set domain]  
 IPR013787 [S100/CaBP-9k-type, calcium binding, subdomain]  
 IPR003597 [Immunoglobulin C1-set] ; IPR013106 [Immunoglobulin V-set domain]  
 IPR003597 [Immunoglobulin C1-set] ; IPR013106 [Immunoglobulin V-set domain]  
 IPR003597 [Immunoglobulin C1-set] ; IPR013106 [Immunoglobulin V-set domain]  
 --  
 IPR013106 [Immunoglobulin V-set domain]  
 IPR001611 [Leucine-rich repeat]  
 IPR003597 [Immunoglobulin C1-set] ; IPR013106 [Immunoglobulin V-set domain]





IPR003597 [Immunoglobulin C1-set] ; IPR013106 [Immunoglobulin V-set domain]  
IPR003597 [Immunoglobulin C1-set] ; IPR013106 [Immunoglobulin V-set domain]  
IPR003597 [Immunoglobulin C1-set] ; IPR013106 [Immunoglobulin V-set domain]  
IPR003597 [Immunoglobulin C1-set] ; IPR013106 [Immunoglobulin V-set domain]  
IPR014760 [Serum albumin, N-terminal] ; IPR015247 [Vitamin D binding protein, domain III]  
IPR001156 [Transferrin-like domain]

eptor class A repeat] ; IPR020864 [Membrane attack complex component/perforin (MACPF) domain

opper-binding] ; IPR015849 [Amyloidogenic glycoprotein, heparin-binding] ; IPR019543 [Beta-amy

] [Laminin EGF domain] ; IPR002172 [Low-density lipoprotein (LDL) receptor class A repeat] ; IPR007

| ; IPR001881 [EGF-like calcium-binding domain] ; IPR002035 [von Willebrand factor, type A] ; IPR00







alin, central] ; IPR018979 [FERM, N-terminal] ; IPR019748 [FERM central domain] ; IPR032425 [Talin,







L72 [Low-density lipoprotein (LDL) receptor class A repeat] ; IPR020864 [Membrane attack complex  
3 [Alpha-macroglobulin, receptor-binding] ; IPR011625 [Alpha-2-macroglobulin, N-terminal 2] ; IP  
IPR008859 [Thrombospondin, C-terminal] ; IPR024665 [Thrombospondin/cartilage oligomeric matr

3 [Alpha-macroglobulin, receptor-binding] ; IPR011625 [Alpha-2-macroglobulin, N-terminal 2] ; IP



IPR008859 [Thrombospondin, C-terminal] ; IPR024665 [Thrombospondin/cartilage oligomeric matr

illebrand factor, type A] ; IPR002919 [Trypsin Inhibitor-like, cysteine rich domain] ; IPR014853 [Uncl

ate dehydrogenase, NAD-binding] ; IPR022675 [Glucose-6-phosphate dehydrogenase, C-terminal]

3 [Alpha-macroglobulin, receptor-binding] ; IPR011625 [Alpha-2-macroglobulin, N-terminal 2] ; IP  
croglobulin, N-terminal] ; IPR009048 [Alpha-macroglobulin, receptor-binding] ; IPR011625 [Alpha-  
croglobulin, N-terminal] ; IPR009048 [Alpha-macroglobulin, receptor-binding] ; IPR011625 [Alpha-

ogen, alpha/beta/gamma chain, coiled coil domain] ; IPR021996 [Fibrinogen alpha C domain]

/illebrand factor, type A] ; IPR002919 [Trypsin Inhibitor-like, cysteine rich domain] ; IPR014853 [Uncl

eptor class A repeat] ; IPR020864 [Membrane attack complex component/perforin (MACPF) domair

-type tyrosine-protein phosphatase C] ; IPR024739 [Protein tyrosine phosphatase, receptor type, N

ON domain] ; IPR024548 [Copper type II ascorbate-dependent monooxygenase, C-terminal]

croglobulin, N-terminal] ; IPR009048 [Alpha-macroglobulin, receptor-binding] ; IPR011625 [Alpha-  
croglobulin, N-terminal] ; IPR009048 [Alpha-macroglobulin, receptor-binding] ; IPR011625 [Alpha-

L72 [Low-density lipoprotein (LDL) receptor class A repeat] ; IPR002350 [Kazal domain] ; IPR020864

·density lipoprotein (LDL) receptor class A repeat] ; IPR026823 [Complement C1r-like EGF domain] ;

3 [Alpha-macroglobulin, receptor-binding] ; IPR011625 [Alpha-2-macroglobulin, N-terminal 2] ; IP

domain] ; IPR014853 [Uncharacterised domain, cysteine-rich] ; IPR025615 [TILa domain]





/oid precursor protein C-terminal] ; IPR024329 [Amyloidogenic glycoprotein, E2 domain]

03410 [HYR domain] ; IPR011641 [Tyrosine-protein kinase ephrin type A/B receptor-like] ; IPR01303















R011626 [Alpha-macroglobulin complement component] ; IPR019565 [Alpha-2-macroglobulin, thi

R011626 [Alpha-macroglobulin complement component] ; IPR019565 [Alpha-2-macroglobulin, thi



characterised domain, cysteine-rich] ; IPR032361 [von Willebrand factor, VWA N-terminal domain]

IPR011626 [Alpha-macroglobulin complement component] ; IPR019565 [Alpha-2-macroglobulin, thi  
-2-macroglobulin, N-terminal 2] ; IPR011626 [Alpha-macroglobulin complement component] ; IPR011626  
-2-macroglobulin, N-terminal 2] ; IPR011626 [Alpha-macroglobulin complement component] ; IPR011626

characterised domain, cysteine-rich] ; IPR032361 [von Willebrand factor, VWA N-terminal domain]

·2-macroglobulin, N-terminal 2] ; IPR011626 [Alpha-macroglobulin complement component] ; IPR(

·2-macroglobulin, N-terminal 2] ; IPR011626 [Alpha-macroglobulin complement component] ; IPR(





R011626 [Alpha-macroglobulin complement component] ; IPR019565 [Alpha-2-macroglobulin, thi































018933 [Netrin module, non-TIMP type] ; IPR019565 [Alpha-2-macroglobulin, thiol-ester bond-for

018933 [Netrin module, non-TIMP type] ; IPR019565 [Alpha-2-macroglobulin, thiol-ester bond-for  
018933 [Netrin module, non-TIMP type] ; IPR019565 [Alpha-2-macroglobulin, thiol-ester bond-for





































ming]



·ming]  
·ming]

## additional file 2: page 158 to 164

| Protein  | Description          | Gene      | S1       | S2       | S3       | S4       | S5       | S6       |
|----------|----------------------|-----------|----------|----------|----------|----------|----------|----------|
| A0A024R3 | Cathepsin            | CTSB      | 25457.6  | 36669.62 | 16311.56 | 9252.642 | 21913.65 | 19212.58 |
| A0A024R4 | Insulin-like         | IGFBP5    | 6745.469 | 8692.381 | 0        | 8372.411 | 10411.44 | 11278.18 |
| A0A024RC | SPARC-like           | SPARCL1   | 0        | 14071.24 | 9229.142 | 12979.11 | 9224.014 | 22657.2  |
| A0A024RD | Lysosomal            | LAMP1     | 12992.53 | 19123.3  | 14337.07 | 13505.64 | 10150.43 | 32614.21 |
| A0A068LN | Ig heavy chain       | variabl   | 3252230  | 4215748  | 1955638  | 3042468  | 3147298  | 1716602  |
| A0A075B6 | Immunogl             | IGLV3-12  | 0        | 0        | 0        | 8236.094 | 70365.29 | 0        |
| A0A109PP | MS-C2 light chain    | var       | 130377.5 | 1352164  | 200612.1 | 1020570  | 174093.6 | 787538.6 |
| A0A125QY | GCT-A6 light chain   | va        | 0        | 0        | 329572.1 | 0        | 285738.7 | 0        |
| A0A125QY | IBM-B2 heavy chain   | v         | 2515532  | 3037551  | 3959000  | 1910470  | 3522983  | 1496249  |
| A0A1L2BU | Anti-staphylococcal  | e         | 35759.44 | 468956.7 | 70693.57 | 98479.91 | 550121.1 | 103563.5 |
| A0A1U9W  | Insulin-like growth  | fa        | 6224.015 | 0        | 17602.8  | 12404.42 | 15878.64 | 8624.972 |
| A0A1W6IY | N90-VRC38.05 heavy   |           | 219715.5 | 22986.53 | 48225.71 | 19984.61 | 47770.48 | 306265.2 |
| A0A286YE | Immunogl             | IGHG3     | 30165668 | 35950988 | 32434816 | 16543170 | 16942030 | 14855433 |
| A0A2U8J8 | Ig heavy c           | IgH       | 83002.31 | 120453.6 | 153761.8 | 132392.9 | 73496.85 | 242458.4 |
| A0A2U8J8 | Ig heavy c           | IgH       | 50863.21 | 111991.4 | 50025.73 | 81598.55 | 50239.83 | 117491.7 |
| A0A2U8J8 | Ig heavy c           | IgH       | 1342127  | 2817630  | 129334.8 | 2308388  | 2620918  | 3264814  |
| A0A2U8J8 | Ig heavy c           | IgH       | 32829.94 | 53562.56 | 89219.9  | 111693.3 | 162604   | 110029.3 |
| A0A2U8J8 | Ig heavy c           | IgH       | 277413.3 | 414960   | 391983.4 | 436745   | 451797.3 | 241422.5 |
| A0A2U8J9 | Ig heavy c           | IgH       | 695590.4 | 2181092  | 563064.8 | 99231.02 | 875335   | 583412.1 |
| A0A2U8J9 | Ig heavy c           | IgH       | 6993.839 | 14413.49 | 5568.763 | 11824.89 | 19347.38 | 10540.66 |
| A0A2U8J9 | Ig heavy c           | IgH       | 0        | 0        | 0        | 23858.19 | 0        | 0        |
| A0A384M  | Epididymis           | secretory | 0        | 0        | 0        | 0        | 0        | 125194.4 |
| A2J1N4   | Rheumatoid factor    | RF        | 321831.6 | 186874.1 | 243632   | 145601.5 | 231864.9 | 122362.6 |
| A2J422   | Anti-HER3 scFv       | (Frag     | 118155.4 | 31700.41 | 108034.7 | 93912.1  | 101665.3 | 272799.4 |
| A2N0S9   | VH6DJ pro            | VH6DJ     | 0        | 38036.77 | 21372.7  | 0        | 0        | 21854.92 |
| A2NYV1   | Heavy chain          | Fab (Frag | 218470.1 | 813437.2 | 686894.1 | 161253.1 | 1153090  | 1273759  |
| A2VDG3   | CSF1R pro            | CSF1R     | 0        | 0        | 98242.38 | 0        | 89154.88 | 0        |
| A8K3I0   | cDNA FLJ78437, high  |           | 8539.188 | 9532.105 | 19868.51 | 4990.972 | 23729.61 | 14581.45 |
| B0YIZ6   | Cubilin              | var CUBN  | 89501.63 | 98511.59 | 186766.6 | 190382.8 | 189713.1 | 49644.97 |
| B1N7B9   | Cryocrystalglobulin  | C         | 808232.1 | 655950.1 | 542070.6 | 1052557  | 260998   | 520661.6 |
| B2R4C5   | Lysozyme             | LYZ       | 38523.89 | 97474.31 | 52196.59 | 43179.35 | 33828.02 | 56198.66 |
| B2R7I0   | cDNA, FLJ93451, high |           | 40922.64 | 87919.32 | 75363.22 | 33135.67 | 59903.77 | 111974.8 |
| B7Z832   | cDNA FLJ51409, high  |           | 11611.88 | 13244.13 | 10531.9  | 12025.09 | 0        | 6702.577 |
| C9JF17   | Apolipoppr           | APOD      | 907265.9 | 1173801  | 1032471  | 1120725  | 975035.5 | 1496166  |
| D3DSM4   | Collagen, t          | COL18A1   | 14720.03 | 16408.95 | 66967.03 | 55259.91 | 15793.48 | 67309.73 |
| D6RE86   | Ceruloplas           | CP        | 32506.71 | 33478.27 | 0        | 32375.46 | 29805.07 | 0        |
| E1B4S8   | Apolipoppr           | APOB      | 201499.9 | 159422.8 | 134047.1 | 200634   | 223143.3 | 207743.7 |
| G1FM90   | Anti-Influenza A     | hem       | 3347982  | 4422754  | 5357378  | 2890563  | 5026250  | 2026237  |
| P00915   | Carbonic             | a CA1     | 37025.79 | 18826.78 | 39390.37 | 22825.23 | 24801.96 | 41733.42 |
| P0DOX8   | Immunoglobulin       | lamk      | 3725390  | 4388946  | 5012275  | 3538180  | 4191968  | 4249662  |
| Q09666   | Neuroblas            | AHNAK     | 5123.492 | 3254.181 | 12146.03 | 4020.288 | 14715.76 | 5748.376 |
| Q0ZC10   | Immunoglobulin       | heavy     | 111866.4 | 148024.1 | 115657.2 | 180019   | 160022.5 | 195522   |
| Q5CZ94   | Uncharact            | DKFZp781  | 156843   | 243746.3 | 338018.2 | 161574.1 | 267892.5 | 158586.5 |
| Q5NV82   | V4-2 prote           | V4-2      | 91991.63 | 20073.65 | 79593.21 | 8910.725 | 115093.6 | 239493.2 |
| Q6LAM1   | Heavy chain of       | factor    | 161577.5 | 77905.02 | 142534.9 | 148946   | 73281.59 | 65756.7  |
| Q6LBV5   | DNA rearranged       | by a      | 59829.47 | 44955.49 | 0        | 31819.61 | 32701.57 | 33215.52 |
| Q6MZU6   | Uncharact            | DKFZp686  | 4867162  | 8528442  | 5924677  | 6648767  | 5450657  | 10846584 |
| Q6N041   | Uncharact            | DKFZp686  | 7328.644 | 0        | 0        | 87196.99 | 0        | 93820.97 |
| Q6N097   | Uncharact            | DKFZp686  | 106623.2 | 118903   | 83680.37 | 73318.67 | 367809.7 | 274864.7 |
| Q8NBP7   | Proprotein           | PCSK9     | 16138.02 | 16152.55 | 8443.666 | 11735.12 | 4972.494 | 11153.71 |
| Q8TCD0   | Uncharacterized      | prot      | 19921972 | 23607334 | 19788184 | 18308650 | 21875232 | 26083740 |
| Q96SB0   | Anti-streptococcal   | ar        | 23545.98 | 182557.9 | 60476.78 | 117931.9 | 77255.63 | 39721.96 |
| Q9UL86   | Myosin-reactive      | imm       | 1499133  | 350395.7 | 320988.8 | 240355.5 | 194503.8 | 1509417  |
| Q9UL88   | Myosin-reactive      | imm       | 885499.7 | 1133176  | 1007774  | 920450.3 | 1264071  | 946000.7 |
| S6BGD4   | IgG H chain          |           | 1408696  | 1839721  | 2902390  | 1840269  | 1768388  | 3135712  |

| S7       | S8       | S9       | S10      | C1       | C2       | C3       | C4       | C5       |
|----------|----------|----------|----------|----------|----------|----------|----------|----------|
| 34901.6  | 14100.41 | 0        | 22683.09 | 4545.37  | 0        | 0        | 19145.42 | 11441.65 |
| 0        | 3013.984 | 2147.28  | 4216.268 | 7832.993 | 23373    | 12903.87 | 16921.61 | 17432.33 |
| 20759.04 | 18798.94 | 22738.06 | 28331.69 | 18312.18 | 14216.49 | 9385.113 | 9854.9   | 7253.495 |
| 14720.2  | 14436.83 | 28929.1  | 17795.3  | 0        | 0        | 8133.507 | 5723.669 | 12180.9  |
| 1592168  | 1692733  | 2436297  | 1356497  | 3192312  | 4736178  | 4037417  | 2327373  | 5634289  |
| 1350236  | 79453.41 | 46390.19 | 0        | 0        | 8701.188 | 1971510  | 4797234  | 1915964  |
| 1738844  | 203402.6 | 1707289  | 1839862  | 153250.5 | 749657   | 242800.1 | 104386.9 | 115811   |
| 208984.9 | 0        | 0        | 186407.4 | 0        | 0        | 30502.13 | 170539.3 | 0        |
| 3366990  | 5406506  | 6767177  | 2997065  | 1485243  | 1911678  | 2184583  | 962864.8 | 3541565  |
| 84934.15 | 98366.69 | 85463.16 | 87206.98 | 713668.6 | 906923.4 | 323116.9 | 411459.4 | 514785.3 |
| 6952.431 | 9464.373 | 13112.42 | 12300.41 | 21032.81 | 16112.16 | 12447.52 | 11963.61 | 21333.23 |
| 260432   | 39558.45 | 237193.6 | 384654   | 0        | 9698.982 | 19892.77 | 58840.66 | 30289.72 |
| 46754440 | 16408049 | 65215400 | 33900460 | 9028015  | 25631524 | 15283871 | 8233777  | 12595329 |
| 265018.6 | 232804.3 | 174851.6 | 152929.9 | 107802.1 | 69176.52 | 114809.8 | 70261.59 | 107996.7 |
| 205700.9 | 103556.9 | 151732.1 | 164251.6 | 30290.94 | 74575.41 | 81300.28 | 93687.88 | 73571.03 |
| 3397863  | 5776548  | 66856.98 | 1777692  | 73479.48 | 1585260  | 2687084  | 155064.6 | 221328.5 |
| 133386.9 | 257007.3 | 79511.06 | 105077.4 | 58074.54 | 89017.59 | 68901.11 | 69625.84 | 68160.67 |
| 533767.8 | 846205.9 | 446430.3 | 425258.7 | 111042.7 | 271219.6 | 207196   | 344054.1 | 231910.7 |
| 977278.4 | 907283.2 | 1867112  | 829863.3 | 369516.7 | 745536.8 | 624461.1 | 727603.4 | 450862.1 |
| 3104.819 | 31555.82 | 16672.04 | 10015.11 | 0        | 12732.86 | 51952.62 | 29653.92 | 66228.24 |
| 77564.16 | 30127.48 | 28794.25 | 0        | 84020.25 | 78780.19 | 115244.4 | 0        | 0        |
| 0        | 0        | 101807.8 | 0        | 0        | 288026.8 | 287795.2 | 0        | 0        |
| 277702.7 | 302782.2 | 166427.1 | 125597.2 | 39399.39 | 0        | 168095.6 | 77170.69 | 149956.8 |
| 760058.4 | 238806.6 | 264486.3 | 376979   | 117959   | 53135.61 | 88070.25 | 82128.52 | 138905.7 |
| 57308.6  | 34845.55 | 44166.79 | 64632.51 | 6021.902 | 0        | 0        | 0        | 22561    |
| 724775.9 | 700398.8 | 1482898  | 577128.7 | 504228.7 | 127162.5 | 448992   | 109688.8 | 187348.9 |
| 56753.9  | 0        | 56520.35 | 0        | 10779.95 | 4199.216 | 6643.271 | 14415.94 | 6950.146 |
| 54378.77 | 47216.06 | 14145.18 | 41516.89 | 14286.64 | 9120.183 | 6356.763 | 10016.45 | 8205.501 |
| 148199.7 | 45574.97 | 82756.82 | 156128   | 34293.41 | 59643.61 | 81939.2  | 61738.93 | 111279.2 |
| 955930.6 | 602660   | 405117.7 | 257333.2 | 615268.5 | 1160220  | 587012.1 | 1014296  | 1084148  |
| 6646.501 | 5391.11  | 16747.49 | 6574.728 | 61395.66 | 36870.96 | 69383.23 | 53844.64 | 47204.27 |
| 61658.74 | 55846.66 | 88494.27 | 24215.84 | 0        | 84881.98 | 0        | 0        | 33049.61 |
| 7457.315 | 13911.51 | 7177.544 | 5610.576 | 17189.88 | 0        | 17711.87 | 20082.74 | 0        |
| 985348.2 | 850427.5 | 691469.5 | 1067804  | 1584194  | 2366769  | 1507529  | 2152249  | 1609863  |
| 10409.33 | 6710.216 | 9570.792 | 7816.165 | 50903.95 | 53117.57 | 49976.28 | 81822.06 | 62578.19 |
| 0        | 0        | 0        | 0        | 0        | 20874.84 | 19775.95 | 23040.95 | 0        |
| 242843.8 | 270164   | 66996.31 | 263235.1 | 0        | 83445.07 | 83295.62 | 132501.3 | 65329.02 |
| 4332143  | 6920130  | 8737848  | 4097320  | 1972394  | 2688968  | 3005849  | 1590871  | 4687086  |
| 69126.11 | 0        | 8726.481 | 16171.7  | 5476.685 | 21604.12 | 0        | 24667.5  | 0        |
| 6845331  | 4768147  | 4459225  | 3795290  | 5978345  | 6276775  | 5835348  | 5889117  | 8398462  |
| 10123.22 | 0        | 3198.766 | 3743.391 | 16303.8  | 20053.67 | 3302.501 | 18431.12 | 12605.04 |
| 237550.8 | 283769.3 | 397059.1 | 145871.6 | 150913.8 | 63110.59 | 110225.1 | 67715.28 | 131023.8 |
| 249782.4 | 598808.1 | 577298.3 | 283192.1 | 250128.5 | 76128.68 | 110377.9 | 103628.5 | 225993.7 |
| 232530.9 | 190168.7 | 491610.5 | 108488.8 | 17189.15 | 22537.85 | 125594.4 | 15466.85 | 29008.02 |
| 102310.7 | 99731.05 | 104085.5 | 79311.28 | 257465   | 148796.6 | 181914.4 | 249854.6 | 129240.9 |
| 55323.25 | 70607.16 | 51496.26 | 42889.77 | 0        | 0        | 0        | 26640.96 | 25317.43 |
| 1213651  | 19271034 | 867902.2 | 7650791  | 10143779 | 16676315 | 15703297 | 16031192 | 14922334 |
| 81847.75 | 78540.02 | 137412.2 | 67563.81 | 9571.027 | 14299.51 | 0        | 0        | 0        |
| 349440.3 | 272625.9 | 661171.5 | 293629.5 | 81570.45 | 69380.92 | 126629.6 | 91493.2  | 79403.48 |
| 17007.95 | 10642.59 | 0        | 3281.653 | 20202.79 | 0        | 16243.6  | 18000.51 | 15387.04 |
| 49277456 | 44851480 | 52305948 | 42662932 | 26187924 | 14012930 | 24481088 | 12462757 | 26402090 |
| 92960.68 | 23365.03 | 69877.19 | 52473.18 | 13730.53 | 24542.87 | 36828.63 | 30060.57 | 24288.79 |
| 2166051  | 1670669  | 2097019  | 1972051  | 195930.2 | 172489.9 | 207290.4 | 120658.8 | 625987.2 |
| 1122793  | 1118947  | 1132786  | 893564.1 | 511864.7 | 496532.7 | 499089.8 | 573859.2 | 644542.1 |
| 5208674  | 4553355  | 6055957  | 3039556  | 1583238  | 1335141  | 1819890  | 1221009  | 1948990  |

| C6       | C7       | C8       | C9       | C10      | S.vs.C FC | S.vs.C Pval | S.vs.C log2 | S.vs.C UP.L |
|----------|----------|----------|----------|----------|-----------|-------------|-------------|-------------|
| 21105.28 | 10858.86 | 0        | 12205.51 | 2747.329 | 1.900642  | 0.022509    | 0.926487    | up          |
| 7921.41  | 11416.15 | 12780.26 | 9341.599 | 13417.46 | 0.514447  | 0.00563     | -0.9589     | down        |
| 7109.777 | 14351.31 | 6851.277 | 7256.044 | 15743.42 | 1.599068  | 0.018105    | 0.677231    | up          |
| 9761.69  | 11826    | 0        | 12800.59 | 8440.398 | 1.815437  | 0.007594    | 0.860317    | up          |
| 1406064  | 2408991  | 5498999  | 4638708  | 4274300  | 0.639704  | 0.020188    | -0.64452    | down        |
| 15804.69 | 3798553  | 0        | 1582377  | 0        | 0.154473  | 0.047865    | -2.69457    | down        |
| 142618   | 685953.6 | 813643.1 | 397316.2 | 116580.6 | 2.599293  | 0.039087    | 1.378119    | up          |
| 156264.3 | 172846.4 | 154934.8 | 0        | 0        | 1.844115  | 0.028989    | 0.882928    | up          |
| 2296513  | 3759735  | 1406407  | 2585241  | 1072473  | 1.649487  | 0.03027     | 0.722018    | up          |
| 103607.9 | 191289   | 981958.9 | 343340.7 | 599709.1 | 0.330765  | 0.005799    | -1.59612    | down        |
| 16494.14 | 24833.88 | 20881.58 | 17315.47 | 34793.72 | 0.577869  | 0.004535    | -0.79118    | down        |
| 50626.99 | 54214.32 | 6389.525 | 166837.6 | 39191.39 | 3.275612  | 0.03563     | 1.711764    | up          |
| 10358878 | 10822323 | 13310423 | 44593868 | 11089455 | 1.92094   | 0.027884    | 0.941813    | up          |
| 82051.01 | 114438.7 | 137007.4 | 107976.5 | 119373.2 | 1.582288  | 0.019549    | 0.662012    | up          |
| 34241.36 | 30023.69 | 84222.69 | 54729.63 | 61123.45 | 1.760296  | 0.024676    | 0.815818    | up          |
| 59496.94 | 1336172  | 3065491  | 112431.5 | 487016.6 | 2.402391  | 0.046686    | 1.264471    | up          |
| 56758.35 | 79909.75 | 35424.61 | 53424.19 | 80238.69 | 1.72079   | 0.041916    | 0.783071    | up          |
| 144393   | 234847   | 213183.9 | 233438.2 | 384408.3 | 1.879866  | 0.002032    | 0.91063     | up          |
| 394814.7 | 181198.9 | 417787.7 | 559905.9 | 447165.9 | 1.947458  | 0.043946    | 0.961592    | up          |
| 23029.37 | 36581.78 | 39326.51 | 35741.7  | 20331.39 | 0.370853  | 0.001563    | -1.43108    | down        |
| 0        | 0        | 0        | 0        | 0        | 0.432513  | 0.030838    | -1.20918    | down        |
| 0        | 0        | 0        | 0        | 0        | 0.394223  | 0.042599    | -1.34292    | down        |
| 56834.14 | 135982   | 72859.66 | 56131.19 | 53501.99 | 2.360951  | 0.000546    | 1.239368    | up          |
| 30473.19 | 35150.23 | 118090.3 | 32466.69 | 70680.2  | 3.085285  | 0.042356    | 1.625404    | up          |
| 11174    | 14049.99 | 24958.72 | 0        | 0        | 2.559291  | 0.012042    | 1.355744    | up          |
| 397560.3 | 456739.2 | 839548.1 | 685001.9 | 180355.8 | 1.979387  | 0.023338    | 0.985053    | up          |
| 0        | 57480.3  | 0        | 0        | 72672.02 | 3.039001  | 0.013189    | 1.603597    | up          |
| 6254.728 | 21921.08 | 8846.853 | 3840.004 | 6624.642 | 2.498079  | 0.032062    | 1.320819    | up          |
| 50612.73 | 141622.2 | 94620.43 | 108374.4 | 31524.55 | 1.595027  | 0.044973    | 0.67358     | up          |
| 1365516  | 1013739  | 611283.9 | 1037664  | 1438036  | 0.610597  | 0.007559    | -0.71171    | down        |
| 70776.72 | 50409.98 | 97301.09 | 50069.75 | 63558.62 | 0.593795  | 0.033241    | -0.75196    | down        |
| 98893.98 | 116997.9 | 138191.1 | 119524.4 | 108273.6 | 0.639606  | 0.02857     | -0.64474    | down        |
| 6061.193 | 19568.05 | 25331.32 | 0        | 11978.45 | 0.582211  | 0.009968    | -0.78039    | down        |
| 1376470  | 1251706  | 835194   | 1810241  | 1125355  | 0.659462  | 0.005815    | -0.60064    | down        |
| 70044.8  | 49177.53 | 47475.45 | 10798.36 | 80298.21 | 0.48718   | 0.012445    | -1.03747    | down        |
| 0        | 0        | 0        | 0        | 0        | 1.509209  | 0.000313    | 0.593792    | up          |
| 177335.5 | 134481.4 | 87853.91 | 136085.6 | 118454.3 | 1.740075  | 0.002528    | 0.79915     | up          |
| 3177846  | 5158317  | 1914558  | 3699890  | 2014442  | 1.576672  | 0.02952     | 0.656882    | up          |
| 5361.505 | 8728.792 | 14546.13 | 11308.59 | 10687.26 | 2.419103  | 0.018836    | 1.274472    | up          |
| 13430261 | 14970247 | 4397174  | 4918636  | 3945393  | 0.607436  | 0.040469    | -0.7192     | down        |
| 7574.449 | 10779.56 | 19679.57 | 21147.35 | 18253.45 | 0.465607  | 0.004556    | -1.10282    | down        |
| 137662.6 | 167200.8 | 173401.5 | 169756.3 | 109662.5 | 1.542441  | 0.041399    | 0.625216    | up          |
| 72642.01 | 178084.7 | 122635   | 140315.6 | 82851.95 | 2.227598  | 0.010251    | 1.155489    | up          |
| 12899.1  | 40327.92 | 120473.4 | 75143.63 | 28991.57 | 3.235956  | 0.040658    | 1.694192    | up          |
| 138584.1 | 92326.52 | 169285.6 | 147885.6 | 88732.26 | 0.65797   | 0.017991    | -0.60391    | down        |
| 0        | 0        | 34121.02 | 0        | 0        | 1.637396  | 0.049162    | 0.711403    | up          |
| 13894890 | 10689256 | 13722111 | 7306066  | 11374047 | 0.546281  | 0.006354    | -0.87228    | down        |
| 0        | 31032.05 | 0        | 9329.803 | 28239.22 | 4.277069  | 0.005271    | 2.096622    | up          |
| 159016.8 | 137799.2 | 133619.4 | 92050.48 | 74334.76 | 2.489306  | 0.023398    | 1.315743    | up          |
| 15730.27 | 13024.75 | 31260.85 | 11043.44 | 14795.1  | 0.639276  | 0.02615     | -0.64549    | down        |
| 21125224 | 20307770 | 25074290 | 22579542 | 18478050 | 1.509547  | 0.038384    | 0.594115    | up          |
| 12057.77 | 51122.49 | 26903.31 | 22745.47 | 33019.29 | 2.688583  | 0.014292    | 1.426846    | up          |
| 441810.5 | 531121.9 | 148890.3 | 723604.6 | 377686.7 | 3.390405  | 0.010379    | 1.761458    | up          |
| 586528.3 | 907179.1 | 1208320  | 469491.3 | 809889.6 | 1.554287  | 0.000385    | 0.636253    | up          |
| 888413.5 | 1656174  | 1234560  | 1040700  | 1799172  | 2.185729  | 0.007874    | 1.128115    | up          |

| GO_NUM | GO_Descri  | KEGG_Des           | KEGG_EC   | KEGG_ko | COG_Func | COG_Func       | COG_Class    | IPR_Term  |
|--------|------------|--------------------|-----------|---------|----------|----------------|--------------|-----------|
| 4      | Molecular  | cathepsin          | 3.4.22.1  | ko04140 | A        | Cysteine p O   | Posttransla  | IPR000668 |
| 3      | Biological | --                 | --        | --      | --       | --             | --           | IPR000716 |
| 4      | Molecular  | --                 | --        | --      | --       | --             | --           | IPR002350 |
| 1      | Cellular   | Cc lysosomal-      | --        | ko04140 | A        | --             | --           | IPR002000 |
| --     | --         | --                 | --        | --      | --       | --             | --           | IPR013106 |
| --     | --         | pre-B lymph        | --        | --      | --       | --             | --           | IPR013106 |
| --     | --         | --                 | --        | --      | --       | --             | --           | IPR013106 |
| --     | --         | --                 | --        | --      | --       | --             | --           | IPR013106 |
| --     | --         | pre-B lymph        | --        | --      | --       | --             | --           | IPR013106 |
| 2      | Molecular  | insulin-like       | --        | ko01521 | E        | --             | --           | IPR016179 |
| --     | --         | immunogl           | --        | ko04020 | C        | --             | --           | IPR013106 |
| --     | --         | --                 | --        | --      | --       | --             | --           | IPR003597 |
| --     | --         | --                 | --        | --      | --       | --             | --           | IPR013106 |
| --     | --         | immunogl           | --        | ko04020 | C        | --             | --           | IPR013106 |
| --     | --         | --                 | --        | --      | --       | --             | --           | IPR013106 |
| --     | --         | --                 | --        | --      | --       | --             | --           | IPR013106 |
| --     | --         | --                 | --        | --      | --       | --             | --           | IPR013106 |
| --     | --         | --                 | --        | --      | --       | --             | --           | IPR013106 |
| --     | --         | immunogl           | --        | ko04020 | C        | --             | --           | IPR013106 |
| --     | --         | C1 inhibitc        | --        | ko04610 | C        | Serine pro O   | Posttransla  | IPR023796 |
| --     | --         | --                 | --        | --      | --       | --             | --           | IPR013106 |
| --     | --         | --                 | --        | --      | --       | --             | --           | IPR013106 |
| --     | --         | immunogl           | --        | ko04020 | C        | --             | --           | IPR013106 |
| --     | --         | immunogl           | --        | ko04020 | C        | --             | --           | IPR013106 |
| --     | --         | macrophag          | 2.7.10.1  | ko04010 | M        | --             | --           | IPR013151 |
| 3      | Molecular  | thrombos           | --        | ko04145 | P        | Alpha-tub DZ   | Cell cycle c | IPR001881 |
| 1      | Molecular  | cubilin            | --        | ko04977 | V        | --             | --           | IPR000742 |
| --     | --         | --                 | --        | --      | --       | --             | --           | IPR013106 |
| --     | --         | lysozyme (3.2.1.17 | --        | ko04970 | S        | --             | --           | IPR001916 |
| 1      | Biological | --                 | --        | --      | --       | Negative r O   | Posttransla  | IPR013766 |
| 3      | Molecular  | thrombos           | --        | ko04145 | P        | Alpha-tub DZ   | Cell cycle c | IPR001881 |
| --     | --         | apolipoprc         | --        | --      | --       | Bacterial lipM | Cell wall/m  | IPR000566 |
| 3      | Molecular  | collagen, t        | --        | ko04974 | P        | Autotrans      | Intracellul  | IPR008160 |
| 1      | Molecular  | ceruloplas         | 1.16.3.1  | ko00860 | P        | Multicopp      | Cell cycle c | IPR011707 |
| --     | --         | apolipoprc         | --        | ko04975 | F        | --             | --           | --        |
| --     | --         | --                 | --        | --      | --       | --             | --           | IPR013106 |
| --     | --         | carbonic a         | 4.2.1.1   | ko00910 | N        | Carbonic aP    | Inorganic i  | IPR001148 |
| --     | --         | --                 | --        | --      | --       | --             | --           | IPR003597 |
| --     | --         | --                 | --        | --      | --       | Ca2+-bind      | Secondary    | --        |
| --     | --         | --                 | --        | --      | --       | --             | --           | IPR013106 |
| --     | --         | --                 | --        | --      | --       | --             | --           | IPR003597 |
| --     | --         | pre-B lymph        | --        | --      | --       | --             | --           | IPR013106 |
| 3      | Molecular  | compleme           | 3.4.21.45 | ko04610 | C        | --             | --           | IPR001190 |
| --     | --         | --                 | --        | --      | --       | --             | --           | IPR013106 |
| --     | --         | immunogl           | --        | ko04020 | C        | --             | --           | IPR003597 |
| --     | --         | --                 | --        | --      | --       | --             | --           | IPR003597 |
| --     | --         | --                 | --        | --      | --       | --             | --           | IPR003597 |
| 2      | Molecular  | proprotein         | 3.4.21.-  | ko04979 | C        | Serine pro O   | Posttransla  | IPR000209 |
| --     | --         | --                 | --        | --      | --       | --             | --           | IPR003597 |
| --     | --         | --                 | --        | --      | --       | --             | --           | IPR013106 |
| --     | --         | --                 | --        | --      | --       | --             | --           | IPR013106 |
| --     | --         | --                 | --        | --      | --       | --             | --           | IPR013106 |
| --     | --         | immunogl           | --        | ko04020 | C        | --             | --           | IPR003597 |

[Kazal domain] ; IPR015369 [Follistatin/Osteonectin EGF domain] ; IPR019577 [SPARC/Testican, calc

[EGF-like calcium-binding domain] ; IPR003367 [Thrombospondin, type 3-like repeat] ; IPR008859

[EGF-like calcium-binding domain] ; IPR003367 [Thrombospondin, type 3-like repeat] ; IPR008859

[Peptidase S8/S53 domain] ; IPR010259 [Peptidase S8 propeptide/proteinase inhibitor I9]

[Thrombospondin, C-terminal] ; IPR024665 [Thrombospondin/cartilage oligomeric matrix protein, ]

[Thrombospondin, C-terminal] ; IPR024665 [Thrombospondin/cartilage oligomeric matrix protein, ]

coiled-coil domain]

coiled-coil domain]



additional file 3: page 165 to 168

| Protein  | Description           | Gene     | S1       | S2       | S3       | S4       | S5       | S6       |
|----------|-----------------------|----------|----------|----------|----------|----------|----------|----------|
| D6RE86   | Ceruloplas            | CP       | 32506.71 | 33478.27 | 0        | 32375.46 | 29805.07 | 0        |
| Q9UL88   | Myosin-reactive immu  |          | 885499.7 | 1133176  | 1007774  | 920450.3 | 1264071  | 946000.7 |
| A2J1N4   | Rheumatoid factor RF  |          | 321831.6 | 186874.1 | 243632   | 145601.5 | 231864.9 | 122362.6 |
| A0A2U8J8 | Ig heavy cI           | IgH      | 277413.3 | 414960   | 391983.4 | 436745   | 451797.3 | 241422.5 |
| E1B4S8   | Apolipopopr           | APOB     | 201499.9 | 159422.8 | 134047.1 | 200634   | 223143.3 | 207743.7 |
| Q6N041   | Uncharact             | DKFZp686 | 7328.644 | 0        | 0        | 87196.99 | 0        | 93820.97 |
| A0A024RD | Lysosomal LAMP1       |          | 12992.53 | 19123.3  | 14337.07 | 13505.64 | 10150.43 | 32614.21 |
| S6BGD4   | IgG H chain           |          | 1408696  | 1839721  | 2902390  | 1840269  | 1768388  | 3135712  |
| Q5CZ94   | Uncharact             | DKFZp781 | 156843   | 243746.3 | 338018.2 | 161574.1 | 267892.5 | 158586.5 |
| Q9UL86   | Myosin-reactive immu  |          | 1499133  | 350395.7 | 320988.8 | 240355.5 | 194503.8 | 1509417  |
| A2N0S9   | VH6DJ pro             | VH6DJ    | 0        | 38036.77 | 21372.7  | 0        | 0        | 21854.92 |
| A2VDG3   | CSF1R pro             | CSF1R    | 0        | 0        | 98242.38 | 0        | 89154.88 | 0        |
| Q96SB0   | Anti-streptococcal/ar |          | 23545.98 | 182557.9 | 60476.78 | 117931.9 | 77255.63 | 39721.96 |
| A0A024RD | SPARC-like            | SPARCL1  | 0        | 14071.24 | 9229.142 | 12979.11 | 9224.014 | 22657.2  |
| P00915   | Carbonic a            | CA1      | 37025.79 | 18826.78 | 39390.37 | 22825.23 | 24801.96 | 41733.42 |
| A0A2U8J8 | Ig heavy cI           | IgH      | 83002.31 | 120453.6 | 153761.8 | 132392.9 | 73496.85 | 242458.4 |
| A0A024R3 | Cathepsin             | CTSB     | 25457.6  | 36669.62 | 16311.56 | 9252.642 | 21913.65 | 19212.58 |
| A2NYV1   | Heavy chain Fab (Frag |          | 218470.1 | 813437.2 | 686894.1 | 161253.1 | 1153090  | 1273759  |
| Q6N097   | Uncharact             | DKFZp686 | 106623.2 | 118903   | 83680.37 | 73318.67 | 367809.7 | 274864.7 |
| A0A2U8J8 | Ig heavy cI           | IgH      | 50863.21 | 111991.4 | 50025.73 | 81598.55 | 50239.83 | 117491.7 |
| A0A286YE | Immunogl              | IGHG3    | 30165668 | 35950988 | 32434816 | 16543170 | 16942030 | 14855433 |
| A0A125QY | GCT-A6 light chain va |          | 0        | 0        | 329572.1 | 0        | 285738.7 | 0        |
| G1FM90   | Anti-Influenza A hem  |          | 3347982  | 4422754  | 5357378  | 2890563  | 5026250  | 2026237  |
| A0A125QY | IBM-B2 heavy chain v  |          | 2515532  | 3037551  | 3959000  | 1910470  | 3522983  | 1496249  |
| A8K3I0   | cDNA FLJ78437, highl  |          | 8539.188 | 9532.105 | 19868.51 | 4990.972 | 23729.61 | 14581.45 |
| A0A1W6IY | N90-VRC38.05 heavy    |          | 219715.5 | 22986.53 | 48225.71 | 19984.61 | 47770.48 | 306265.2 |
| Q8TCD0   | Uncharacterized prote |          | 19921972 | 23607334 | 19788184 | 18308650 | 21875232 | 26083740 |
| A0A109PP | MS-C2 light chain var |          | 130377.5 | 1352164  | 200612.1 | 1020570  | 174093.6 | 787538.6 |
| Q5NV82   | V4-2 prote            | V4-2     | 91991.63 | 20073.65 | 79593.21 | 8910.725 | 115093.6 | 239493.2 |
| Q0ZCI0   | Immunoglobulin heavy  |          | 111866.4 | 148024.1 | 115657.2 | 180019   | 160022.5 | 195522   |
| A0A2U8J8 | Ig heavy cI           | IgH      | 32829.94 | 53562.56 | 89219.9  | 111693.3 | 162604   | 110029.3 |
| A2J422   | Anti-HER3 scFv (Frag  |          | 118155.4 | 31700.41 | 108034.7 | 93912.1  | 101665.3 | 272799.4 |
| A0A2U8J9 | Ig heavy cI           | IgH      | 695590.4 | 2181092  | 563064.8 | 99231.02 | 875335   | 583412.1 |
| B0YIZ6   | Cubilin var           | CUBN     | 89501.63 | 98511.59 | 186766.6 | 190382.8 | 189713.1 | 49644.97 |
| A0A2U8J8 | Ig heavy cI           | IgH      | 1342127  | 2817630  | 129334.8 | 2308388  | 2620918  | 3264814  |
| Q6LBV5   | DNA rearranged by a   |          | 59829.47 | 44955.49 | 0        | 31819.61 | 32701.57 | 33215.52 |

| S7       | S8       | S9       | S10      | C1       | C2       | C3       | C4       | C5       |
|----------|----------|----------|----------|----------|----------|----------|----------|----------|
| 0        | 0        | 0        | 0        | 0        | 20874.84 | 19775.95 | 23040.95 | 0        |
| 1122793  | 1118947  | 1132786  | 893564.1 | 511864.7 | 496532.7 | 499089.8 | 573859.2 | 644542.1 |
| 277702.7 | 302782.2 | 166427.1 | 125597.2 | 39399.39 | 0        | 168095.6 | 77170.69 | 149956.8 |
| 533767.8 | 846205.9 | 446430.3 | 425258.7 | 111042.7 | 271219.6 | 207196   | 344054.1 | 231910.7 |
| 242843.8 | 270164   | 66996.31 | 263235.1 | 0        | 83445.07 | 83295.62 | 132501.3 | 65329.02 |
| 81847.75 | 78540.02 | 137412.2 | 67563.81 | 9571.027 | 14299.51 | 0        | 0        | 0        |
| 14720.2  | 14436.83 | 28929.1  | 17795.3  | 0        | 0        | 8133.507 | 5723.669 | 12180.9  |
| 5208674  | 4553355  | 6055957  | 3039556  | 1583238  | 1335141  | 1819890  | 1221009  | 1948990  |
| 249782.4 | 598808.1 | 577298.3 | 283192.1 | 250128.5 | 76128.68 | 110377.9 | 103628.5 | 225993.7 |
| 2166051  | 1670669  | 2097019  | 1972051  | 195930.2 | 172489.9 | 207290.4 | 120658.8 | 625987.2 |
| 57308.6  | 34845.55 | 44166.79 | 64632.51 | 6021.902 | 0        | 0        | 0        | 22561    |
| 56753.9  | 0        | 56520.35 | 0        | 10779.95 | 4199.216 | 6643.271 | 14415.94 | 6950.146 |
| 92960.68 | 23365.03 | 69877.19 | 52473.18 | 13730.53 | 24542.87 | 36828.63 | 30060.57 | 24288.79 |
| 20759.04 | 18798.94 | 22738.06 | 28331.69 | 18312.18 | 14216.49 | 9385.113 | 9854.9   | 7253.495 |
| 69126.11 | 0        | 8726.481 | 16171.7  | 5476.685 | 21604.12 | 0        | 24667.5  | 0        |
| 265018.6 | 232804.3 | 174851.6 | 152929.9 | 107802.1 | 69176.52 | 114809.8 | 70261.59 | 107996.7 |
| 34901.6  | 14100.41 | 0        | 22683.09 | 4545.37  | 0        | 0        | 19145.42 | 11441.65 |
| 724775.9 | 700398.8 | 1482898  | 577128.7 | 504228.7 | 127162.5 | 448992   | 109688.8 | 187348.9 |
| 349440.3 | 272625.9 | 661171.5 | 293629.5 | 81570.45 | 69380.92 | 126629.6 | 91493.2  | 79403.48 |
| 205700.9 | 103556.9 | 151732.1 | 164251.6 | 30290.94 | 74575.41 | 81300.28 | 93687.88 | 73571.03 |
| 46754440 | 16408049 | 65215400 | 33900460 | 9028015  | 25631524 | 15283871 | 8233777  | 12595329 |
| 208984.9 | 0        | 0        | 186407.4 | 0        | 0        | 30502.13 | 170539.3 | 0        |
| 4332143  | 6920130  | 8737848  | 4097320  | 1972394  | 2688968  | 3005849  | 1590871  | 4687086  |
| 3366990  | 5406506  | 6767177  | 2997065  | 1485243  | 1911678  | 2184583  | 962864.8 | 3541565  |
| 54378.77 | 47216.06 | 14145.18 | 41516.89 | 14286.64 | 9120.183 | 6356.763 | 10016.45 | 8205.501 |
| 260432   | 39558.45 | 237193.6 | 384654   | 0        | 9698.982 | 19892.77 | 58840.66 | 30289.72 |
| 49277456 | 44851480 | 52305948 | 42662932 | 26187924 | 14012930 | 24481088 | 12462757 | 26402090 |
| 1738844  | 203402.6 | 1707289  | 1839862  | 153250.5 | 749657   | 242800.1 | 104386.9 | 115811   |
| 232530.9 | 190168.7 | 491610.5 | 108488.8 | 17189.15 | 22537.85 | 125594.4 | 15466.85 | 29008.02 |
| 237550.8 | 283769.3 | 397059.1 | 145871.6 | 150913.8 | 63110.59 | 110225.1 | 67715.28 | 131023.8 |
| 133386.9 | 257007.3 | 79511.06 | 105077.4 | 58074.54 | 89017.59 | 68901.11 | 69625.84 | 68160.67 |
| 760058.4 | 238806.6 | 264486.3 | 376979   | 117959   | 53135.61 | 88070.25 | 82128.52 | 138905.7 |
| 977278.4 | 907283.2 | 1867112  | 829863.3 | 369516.7 | 745536.8 | 624461.1 | 727603.4 | 450862.1 |
| 148199.7 | 45574.97 | 82756.82 | 156128   | 34293.41 | 59643.61 | 81939.2  | 61738.93 | 111279.2 |
| 3397863  | 5776548  | 66856.98 | 1777692  | 73479.48 | 1585260  | 2687084  | 155064.6 | 221328.5 |
| 55323.25 | 70607.16 | 51496.26 | 42889.77 | 0        | 0        | 0        | 26640.96 | 25317.43 |

| C6       | C7       | C8       | C9       | C10      | S.vs.C FC | S.vs.C Pval | S.vs.C log2 | S.vs.C UP.E |
|----------|----------|----------|----------|----------|-----------|-------------|-------------|-------------|
| 0        | 0        | 0        | 0        | 0        | 1.509209  | 0.000313    | 0.593792    | up          |
| 586528.3 | 907179.1 | 1208320  | 469491.3 | 809889.6 | 1.554287  | 0.000385    | 0.636253    | up          |
| 56834.14 | 135982   | 72859.66 | 56131.19 | 53501.99 | 2.360951  | 0.000546    | 1.239368    | up          |
| 144393   | 234847   | 213183.9 | 233438.2 | 384408.3 | 1.879866  | 0.002032    | 0.91063     | up          |
| 177335.5 | 134481.4 | 87853.91 | 136085.6 | 118454.3 | 1.740075  | 0.002528    | 0.79915     | up          |
| 0        | 31032.05 | 0        | 9329.803 | 28239.22 | 4.277069  | 0.005271    | 2.096622    | up          |
| 9761.69  | 11826    | 0        | 12800.59 | 8440.398 | 1.815437  | 0.007594    | 0.860317    | up          |
| 888413.5 | 1656174  | 1234560  | 1040700  | 1799172  | 2.185729  | 0.007874    | 1.128115    | up          |
| 72642.01 | 178084.7 | 122635   | 140315.6 | 82851.95 | 2.227598  | 0.010251    | 1.155489    | up          |
| 441810.5 | 531121.9 | 148890.3 | 723604.6 | 377686.7 | 3.390405  | 0.010379    | 1.761458    | up          |
| 11174    | 14049.99 | 24958.72 | 0        | 0        | 2.559291  | 0.012042    | 1.355744    | up          |
| 0        | 57480.3  | 0        | 0        | 72672.02 | 3.039001  | 0.013189    | 1.603597    | up          |
| 12057.77 | 51122.49 | 26903.31 | 22745.47 | 33019.29 | 2.688583  | 0.014292    | 1.426846    | up          |
| 7109.777 | 14351.31 | 6851.277 | 7256.044 | 15743.42 | 1.599068  | 0.018105    | 0.677231    | up          |
| 5361.505 | 8728.792 | 14546.13 | 11308.59 | 10687.26 | 2.419103  | 0.018836    | 1.274472    | up          |
| 82051.01 | 114438.7 | 137007.4 | 107976.5 | 119373.2 | 1.582288  | 0.019549    | 0.662012    | up          |
| 21105.28 | 10858.86 | 0        | 12205.51 | 2747.329 | 1.900642  | 0.022509    | 0.926487    | up          |
| 397560.3 | 456739.2 | 839548.1 | 685001.9 | 180355.8 | 1.979387  | 0.023338    | 0.985053    | up          |
| 159016.8 | 137799.2 | 133619.4 | 92050.48 | 74334.76 | 2.489306  | 0.023398    | 1.315743    | up          |
| 34241.36 | 30023.69 | 84222.69 | 54729.63 | 61123.45 | 1.760296  | 0.024676    | 0.815818    | up          |
| 10358878 | 10822323 | 13310423 | 44593868 | 11089455 | 1.92094   | 0.027884    | 0.941813    | up          |
| 156264.3 | 172846.4 | 154934.8 | 0        | 0        | 1.844115  | 0.028989    | 0.882928    | up          |
| 3177846  | 5158317  | 1914558  | 3699890  | 2014442  | 1.576672  | 0.02952     | 0.656882    | up          |
| 2296513  | 3759735  | 1406407  | 2585241  | 1072473  | 1.649487  | 0.03027     | 0.722018    | up          |
| 6254.728 | 21921.08 | 8846.853 | 3840.004 | 6624.642 | 2.498079  | 0.032062    | 1.320819    | up          |
| 50626.99 | 54214.32 | 6389.525 | 166837.6 | 39191.39 | 3.275612  | 0.03563     | 1.711764    | up          |
| 21125224 | 20307770 | 25074290 | 22579542 | 18478050 | 1.509547  | 0.038384    | 0.594115    | up          |
| 142618   | 685953.6 | 813643.1 | 397316.2 | 116580.6 | 2.599293  | 0.039087    | 1.378119    | up          |
| 12899.1  | 40327.92 | 120473.4 | 75143.63 | 28991.57 | 3.235956  | 0.040658    | 1.694192    | up          |
| 137662.6 | 167200.8 | 173401.5 | 169756.3 | 109662.5 | 1.542441  | 0.041399    | 0.625216    | up          |
| 56758.35 | 79909.75 | 35424.61 | 53424.19 | 80238.69 | 1.72079   | 0.041916    | 0.783071    | up          |
| 30473.19 | 35150.23 | 118090.3 | 32466.69 | 70680.2  | 3.085285  | 0.042356    | 1.625404    | up          |
| 394814.7 | 181198.9 | 417787.7 | 559905.9 | 447165.9 | 1.947458  | 0.043946    | 0.961592    | up          |
| 50612.73 | 141622.2 | 94620.43 | 108374.4 | 31524.55 | 1.595027  | 0.044973    | 0.67358     | up          |
| 59496.94 | 1336172  | 3065491  | 112431.5 | 487016.6 | 2.402391  | 0.046686    | 1.264471    | up          |
| 0        | 0        | 34121.02 | 0        | 0        | 1.637396  | 0.049162    | 0.711403    | up          |

DOWN

## additional file 4: page 169 to 172

| Protein  | Description            | Gene     | S1       | S2       | S3       | S4       | S5       | S6       |
|----------|------------------------|----------|----------|----------|----------|----------|----------|----------|
| A0A024R4 | Insulin-like           | IGFBP5   | 6745.469 | 8692.381 | 0        | 8372.411 | 10411.44 | 11278.18 |
| A0A068LN | Ig heavy chain variabl |          | 3252230  | 4215748  | 1955638  | 3042468  | 3147298  | 1716602  |
| A0A075B6 | Immunoglobulin         | IGLV3-12 | 0        | 0        | 0        | 8236.094 | 70365.29 | 0        |
| A0A1L2BU | Anti-staphylococcal e  |          | 35759.44 | 468956.7 | 70693.57 | 98479.91 | 550121.1 | 103563.5 |
| A0A1U9W  | Insulin-like growth fa |          | 6224.015 | 0        | 17602.8  | 12404.42 | 15878.64 | 8624.972 |
| A0A2U8J9 | Ig heavy chain         | IgH      | 6993.839 | 14413.49 | 5568.763 | 11824.89 | 19347.38 | 10540.66 |
| A0A2U8J9 | Ig heavy chain         | IgH      | 0        | 0        | 0        | 23858.19 | 0        | 0        |
| A0A384MI | Epididymis secretory   |          | 0        | 0        | 0        | 0        | 0        | 125194.4 |
| B1N7B9   | Cryocryoglobulin C     |          | 808232.1 | 655950.1 | 542070.6 | 1052557  | 260998   | 520661.6 |
| B2R4C5   | Lysozyme               | LYZ      | 38523.89 | 97474.31 | 52196.59 | 43179.35 | 33828.02 | 56198.66 |
| B2R7I0   | cDNA, FLJ93451, high   |          | 40922.64 | 87919.32 | 75363.22 | 33135.67 | 59903.77 | 111974.8 |
| B7Z832   | cDNA FLJ51409, high    |          | 11611.88 | 13244.13 | 10531.9  | 12025.09 | 0        | 6702.577 |
| C9JF17   | Apolipoprotein         | APOD     | 907265.9 | 1173801  | 1032471  | 1120725  | 975035.5 | 1496166  |
| D3DSM4   | Collagen, type         | COL18A1  | 14720.03 | 16408.95 | 66967.03 | 55259.91 | 15793.48 | 67309.73 |
| P0DOX8   | Immunoglobulin lam     |          | 3725390  | 4388946  | 5012275  | 3538180  | 4191968  | 4249662  |
| Q09666   | Neuroblastoma          | AHNAK    | 5123.492 | 3254.181 | 12146.03 | 4020.288 | 14715.76 | 5748.376 |
| Q6LAM1   | Heavy chain of factor  |          | 161577.5 | 77905.02 | 142534.9 | 148946   | 73281.59 | 65756.7  |
| Q6MZU6   | Uncharacterized        | DKFZp686 | 4867162  | 8528442  | 5924677  | 6648767  | 5450657  | 10846584 |
| Q8NBP7   | Proprotein             | PCSK9    | 16138.02 | 16152.55 | 8443.666 | 11735.12 | 4972.494 | 11153.71 |

| S7       | S8       | S9       | S10      | C1       | C2       | C3       | C4       | C5       |
|----------|----------|----------|----------|----------|----------|----------|----------|----------|
| 0        | 3013.984 | 2147.28  | 4216.268 | 7832.993 | 23373    | 12903.87 | 16921.61 | 17432.33 |
| 1592168  | 1692733  | 2436297  | 1356497  | 3192312  | 4736178  | 4037417  | 2327373  | 5634289  |
| 1350236  | 79453.41 | 46390.19 | 0        | 0        | 8701.188 | 1971510  | 4797234  | 1915964  |
| 84934.15 | 98366.69 | 85463.16 | 87206.98 | 713668.6 | 906923.4 | 323116.9 | 411459.4 | 514785.3 |
| 6952.431 | 9464.373 | 13112.42 | 12300.41 | 21032.81 | 16112.16 | 12447.52 | 11963.61 | 21333.23 |
| 3104.819 | 31555.82 | 16672.04 | 10015.11 | 0        | 12732.86 | 51952.62 | 29653.92 | 66228.24 |
| 77564.16 | 30127.48 | 28794.25 | 0        | 84020.25 | 78780.19 | 115244.4 | 0        | 0        |
| 0        | 0        | 101807.8 | 0        | 0        | 288026.8 | 287795.2 | 0        | 0        |
| 955930.6 | 602660   | 405117.7 | 257333.2 | 615268.5 | 1160220  | 587012.1 | 1014296  | 1084148  |
| 6646.501 | 5391.11  | 16747.49 | 6574.728 | 61395.66 | 36870.96 | 69383.23 | 53844.64 | 47204.27 |
| 61658.74 | 55846.66 | 88494.27 | 24215.84 | 0        | 84881.98 | 0        | 0        | 33049.61 |
| 7457.315 | 13911.51 | 7177.544 | 5610.576 | 17189.88 | 0        | 17711.87 | 20082.74 | 0        |
| 985348.2 | 850427.5 | 691469.5 | 1067804  | 1584194  | 2366769  | 1507529  | 2152249  | 1609863  |
| 10409.33 | 6710.216 | 9570.792 | 7816.165 | 50903.95 | 53117.57 | 49976.28 | 81822.06 | 62578.19 |
| 6845331  | 4768147  | 4459225  | 3795290  | 5978345  | 6276775  | 5835348  | 5889117  | 8398462  |
| 10123.22 | 0        | 3198.766 | 3743.391 | 16303.8  | 20053.67 | 3302.501 | 18431.12 | 12605.04 |
| 102310.7 | 99731.05 | 104085.5 | 79311.28 | 257465   | 148796.6 | 181914.4 | 249854.6 | 129240.9 |
| 1213651  | 19271034 | 867902.2 | 7650791  | 10143779 | 16676315 | 15703297 | 16031192 | 14922334 |
| 17007.95 | 10642.59 | 0        | 3281.653 | 20202.79 | 0        | 16243.6  | 18000.51 | 15387.04 |

| C6       | C7       | C8       | C9       | C10      | S.vs.C FC | S.vs.C Pval | S.vs.C log2 | S.vs.C UP.E |
|----------|----------|----------|----------|----------|-----------|-------------|-------------|-------------|
| 7921.41  | 11416.15 | 12780.26 | 9341.599 | 13417.46 | 0.514447  | 0.00563     | -0.9589     | down        |
| 1406064  | 2408991  | 5498999  | 4638708  | 4274300  | 0.639704  | 0.020188    | -0.64452    | down        |
| 15804.69 | 3798553  | 0        | 1582377  | 0        | 0.154473  | 0.047865    | -2.69457    | down        |
| 103607.9 | 191289   | 981958.9 | 343340.7 | 599709.1 | 0.330765  | 0.005799    | -1.59612    | down        |
| 16494.14 | 24833.88 | 20881.58 | 17315.47 | 34793.72 | 0.577869  | 0.004535    | -0.79118    | down        |
| 23029.37 | 36581.78 | 39326.51 | 35741.7  | 20331.39 | 0.370853  | 0.001563    | -1.43108    | down        |
| 0        | 0        | 0        | 0        | 0        | 0.432513  | 0.030838    | -1.20918    | down        |
| 0        | 0        | 0        | 0        | 0        | 0.394223  | 0.042599    | -1.34292    | down        |
| 1365516  | 1013739  | 611283.9 | 1037664  | 1438036  | 0.610597  | 0.007559    | -0.71171    | down        |
| 70776.72 | 50409.98 | 97301.09 | 50069.75 | 63558.62 | 0.593795  | 0.033241    | -0.75196    | down        |
| 98893.98 | 116997.9 | 138191.1 | 119524.4 | 108273.6 | 0.639606  | 0.02857     | -0.64474    | down        |
| 6061.193 | 19568.05 | 25331.32 | 0        | 11978.45 | 0.582211  | 0.009968    | -0.78039    | down        |
| 1376470  | 1251706  | 835194   | 1810241  | 1125355  | 0.659462  | 0.005815    | -0.60064    | down        |
| 70044.8  | 49177.53 | 47475.45 | 10798.36 | 80298.21 | 0.48718   | 0.012445    | -1.03747    | down        |
| 13430261 | 14970247 | 4397174  | 4918636  | 3945393  | 0.607436  | 0.040469    | -0.7192     | down        |
| 7574.449 | 10779.56 | 19679.57 | 21147.35 | 18253.45 | 0.465607  | 0.004556    | -1.10282    | down        |
| 138584.1 | 92326.52 | 169285.6 | 147885.6 | 88732.26 | 0.65797   | 0.017991    | -0.60391    | down        |
| 13894890 | 10689256 | 13722111 | 7306066  | 11374047 | 0.546281  | 0.006354    | -0.87228    | down        |
| 15730.27 | 13024.75 | 31260.85 | 11043.44 | 14795.1  | 0.639276  | 0.02615     | -0.64549    | down        |

DOWN
